# Supplementary material for: A Novel Viral Assembly Inhibitor Blocks SARS-CoV-2 Replication in Airway Epithelial Cells
Source: Research Square preprint supplement (doi:10.21203/rs.3.rs-2887435/v1), 2023-05-17
Supplement: Supplementary file 2 [file 5e9a0e23d542587718ea4371.xlsx]

## Sheet: SC
	pathway	pval	padj	ES	NES	nMoreExtreme	size	leadingEdge
1	REACTOME_INTERFERON_ALPHA_BETA_SIGNALING	0.00131234	0.0175605	0.810831	2.85386	0	54	OAS3,IFIT2,ISG15,IFIT3,OAS2,IFIT1,RSAD2,OAS1,EGR1,IRF7,IFI35,STAT1,IFI6,MX1,XAF1,USP18,MX2,OASL,BST2,SAMHD1,ISG20,STAT2,SOCS1,ADAR,IRF1,HLA-A,IFI27,IFIT5,IRF9,IFITM1,HLA-B,HLA-E,SOCS3,HLA-F,HLA-C
2	REACTOME_INTERFERON_SIGNALING	0.00110865	0.0175605	0.657035	2.71422	0	172	OAS3,IFIT2,ISG15,IFIT3,OAS2,IFIT1,RSAD2,OAS1,EGR1,IRF7,IFI35,DDX58,TRIM25,STAT1,IFI6,EIF2AK2,MX1,XAF1,PML,USP18,MX2,OASL,GBP4,BST2,HERC5,GBP1,SAMHD1,ISG20,TRIM14,STAT2,SOCS1,ICAM1,ADAR,IRF1,HLA-A,PRKCD,FLNA,GBP5,SP100,EIF4G1,UBE2L6,IFI27,TRIM26,IFIT5,IRF9,TRIM5,TRIM21,TRIM8,TRIM22,JAK2,KPNB1,IFITM1,UBA7,POM121C,HLA-B,TRIM38,HLA-E,TRIM68,FLNB,SOCS3,HLA-F,HLA-C
3	REACTOME_INTERFERON_GAMMA_SIGNALING	0.00126103	0.0175605	0.704614	2.62636	0	77	OAS3,OAS2,OAS1,IRF7,TRIM25,STAT1,PML,OASL,GBP4,GBP1,TRIM14,SOCS1,ICAM1,IRF1,HLA-A,PRKCD,GBP5,SP100,TRIM26,IRF9,TRIM5,TRIM21,TRIM8,TRIM22,JAK2,HLA-B,TRIM38,HLA-E,TRIM68,SOCS3,HLA-F,HLA-C
4	REACTOME_CELL_CELL_COMMUNICATION	0.00119904	0.0175605	0.644463	2.49115	0	98	NCK2,LAMC2,LAMA3,ACTN1,JUP,ACTG1,FLNA,ACTB,NECTIN2,CLDN4,ACTN4,PTK2B,CLDN23,CDH1,GRB2,PVR,LAMB3,COL17A1,CLDN7,WASL,CD47,SRC,CLDN5,ITGB4,CASK,CLDN3,CDH6,CDH2,SIRPA,NECTIN4,SDK2,PARD6B,PLEC,CDH3,CDH11,VASP,PARD3,PARVA,SPTBN1,F11R,FYN,FBLIM1,CD151,PXN
5	REACTOME_CYTOKINE_SIGNALING_IN_IMMUNE_SYSTEM	0.00100807	0.0175605	0.546758	2.43276	0	566	OAS3,JUN,IFIT2,CXCL10,ISG15,IFIT3,OAS2,IFIT1,RSAD2,OAS1,PTGS2,EGR1,IRF7,IFI35,DDX58,FN1,TRIM25,TNFSF13B,STAT1,IFI6,EIF2AK2,MX1,MMP9,XAF1,PML,USP18,MX2,CCL5,IL36RN,OASL,GBP4,BST2,HERC5,GBP1,SAMHD1,ISG20,PIM1,TRIM14,JUNB,PRKACA,STAT2,SOCS1,MMP2,TP53,ICAM1,LGALS9,ADAR,IRF1,SMARCA4,HLA-A,PRKCD,FLNA,FOS,RELA,GBP5,CSF1,TNFRSF12A,SP100,CCND1,EIF4G1,UBE2L6,LIFR,IFI27,TRIM26,TNFSF13,IFNLR1,CSF2,IFIT5,UBE2…
6	REACTOME_SIGNALING_BY_VEGF	0.00120919	0.0175605	0.621113	2.39478	0	96	PRKACA,NCK2,JUP,ACTG1,PRKCD,SPHK1,ACTB,PTK2B,BCAR1,NCF1,SRC,RASA1,PRKCZ,WASF2,MAPKAPK2,VAV2,AKT1,DOCK1,NRP1,BAIAP2,PGF,AHCYL1,SHB,NCKAP1,TRIB3,VAV1,MAPKAP1,MAPK14,CAV1,FYN,MAPK13,ITPR1,PXN,CRK,HRAS,MTOR,ITPR2,WASF1,ITPR3,PAK2,PDPK1,VEGFA,WASF3,KDR,VEGFB,KRAS,ITGB3,AKT2,ITGAV,MLST8,ROCK1,ELMO2,PIK3CA,HSPB1,SHC2
7	REACTOME_DDX58_IFIH1_MEDIATED_INDUCTION_OF_INTERFERON_ALPHA_BETA	0.00128866	0.0175605	0.649375	2.36958	0	67	ISG15,IFIH1,IRF7,DDX58,TRIM25,NLRC5,TNFAIP3,HERC5,DHX58,RELA,UBE2L6,OTUD5,UBE2D2,TRAF3,NFKBIA,UBA7,RIPK1,APP,TKFC,CREBBP,NFKB2,PCBP2,NFKB1,EP300,CYLD,NFKBIB,CASP10,MAVS,NKIRAS2
8	REACTOME_CELL_JUNCTION_ORGANIZATION	0.00125786	0.0175605	0.638679	2.36167	0	73	LAMC2,LAMA3,ACTN1,JUP,ACTG1,FLNA,ACTB,NECTIN2,CLDN4,CLDN23,CDH1,PVR,LAMB3,COL17A1,CLDN7,CLDN5,ITGB4,CLDN3,CDH6,CDH2,NECTIN4,SDK2,PARD6B,PLEC,CDH3,CDH11,VASP,PARD3,PARVA,F11R,FBLIM1,CD151,PXN
9	REACTOME_INTERLEUKIN_4_AND_INTERLEUKIN_13_SIGNALING	0.00125471	0.0175605	0.622464	2.3329	0	82	PTGS2,FN1,STAT1,MMP9,PIM1,JUNB,SOCS1,MMP2,TP53,ICAM1,FOS,CCND1,CCL22,ALOX15,SOX2,MMP1,JAK2,MCL1,HMOX1,IL1A,AKT1,STAT3,VIM,SOCS3,FSCN1,ZEB1,LIF,CDKN1A,TGFB1,FOXO3,POU2F1,JAK1,GATA3,BCL2L1,ITGB2,VEGFA,ANXA1,IL1B,MYC
10	REACTOME_SIGNALING_BY_NTRKS	0.00118203	0.0175605	0.58614	2.30576	0	116	EGR1,FOSB,JUNB,EGR2,FOS,EGR3,AP2A1,AP2A2,MAP2K2,RPS6KA2,CLTA,GRB2,IRS2,FOSL1,SHC1,SRC,PCSK6,ID3,JUND,SRF,NELFB,TRIB1,MAPKAPK2,FURIN,STAT3,DNM2,MEF2D,PPP2R1A,ID4,DUSP4,RALB,RAPGEF1,EP300,MAPK14,FYN,MAPK13,DUSP6,PPP2CB,ELK1,RRAD,CRK,HRAS,IRS1,RPS6KA1,MAP2K5,BAX,F3,MAPK3,SHC3,KRAS,CDK5R1,DUSP3,RPS6KA3,PIK3CA,AP2M1,MAPK1,SHC2,MEF2C,MAP2K1,CLTC,DNM3,DUSP7,CRKL,AP2S1,NTF4,DOCK3,PPP2R5D
11	REACTOME_NGF_STIMULATED_TRANSCRIPTION	0.00145138	0.0175605	0.706168	2.27507	0	33	EGR1,FOSB,JUNB,EGR2,FOS,EGR3,FOSL1,ID3,JUND,SRF,TRIB1,DNM2,MEF2D,ID4,EP300,ELK1,RRAD
12	REACTOME_EXTRA_NUCLEAR_ESTROGEN_SIGNALING	0.00130378	0.0175605	0.626694	2.26187	0	63	MMP9,GNB2,MMP2,FOS,SPHK1,CCND1,GNB4,EREG,GNB1,GNG4,GNAI2,SHC1,SRC,PRKCZ,SRF,AKT1,STRN,FOXO3,CAV1,CDKN1B,EGFR,ELK1,EPGN,HRAS,ZDHHC7,EGF,PDPK1,IGF1R,ESR1,MAPK3,KRAS,AKT2,BCL2,PIK3CA,HSPB1,MAPK1,CAV2,AREG,TGFA
13	REACTOME_LEISHMANIA_INFECTION	0.00114811	0.0175605	0.55654	2.25902	0	146	JUN,PRKACA,GNB2,ACTG1,MYO1C,RELA,DVL2,ACTB,MYH9,MYO10,RHBDF2,ADRB1,ABL1,GRB2,GNB4,GNB1,GNG4,GNAI2,WASL,SRC,WIPF2,ADM,GNAS,WASF2,ADM2,FURIN,HMOX1,IL1A,VAV2,DOCK1,BAIAP2,APP,AHCYL1,NCKAP1,NFKB2,ADCY9,PRKX,VAV1,NFKB1,MAPK14,ADCY7,FYN,ITPR1,MYO9B,YES1,CRK,ARPC4,ADRB2,ITPR2,DVL3,WASF1,ITPR3,PYCARD,PTGER4,LYN,WASF3,DVL1,SCTR,IL1B,C3,MAPK3,CASP1,ADCY5,NCKIPSD,PRKAR1B,ADCY4,GNAZ,NT5E,ELMO2,FZD7,IL18,MAPK…
14	REACTOME_SIGNALING_BY_RECEPTOR_TYROSINE_KINASES	0.00103093	0.0175605	0.510947	2.24163	0	431	EGR1,FN1,STAT1,MMP9,CD274,FOSB,PRDM1,JUNB,PRKACA,ATP6V0D1,SOCS1,COL4A2,NCK2,LAMC2,SPARC,LAMA3,EGR2,JUP,ACTG1,PRKCD,FOS,SPHK1,PDGFB,GTF2F1,EGR3,ACTB,AP2A1,AP2A2,SPINT1,PTK2B,MAP2K2,RPS6KA2,PTBP1,CLTA,CSK,SPRED1,GRB10,GRB2,THBS1,IRS2,SH3KBP1,FOSL1,BCAR1,EREG,LAMB3,SH3GL1,APH1A,NCF1,ITGA3,SHC1,STAT5A,JAK2,POLR2A,RBFOX2,SRC,PTPRJ,RASA1,PCSK6,SH2B2,PTPRU,PRKCZ,ID3,MDK,JUND,SRF,NELFB,WASF2,TRIB1,MAPKAP…
15	REACTOME_NUCLEAR_EVENTS_KINASE_AND_TRANSCRIPTION_FACTOR_ACTIVATION	0.00131062	0.0175605	0.626166	2.20752	0	55	EGR1,FOSB,JUNB,EGR2,FOS,EGR3,RPS6KA2,FOSL1,ID3,JUND,SRF,TRIB1,MAPKAPK2,DNM2,MEF2D,PPP2R1A,ID4,DUSP4,EP300,MAPK14,DUSP6,PPP2CB,ELK1,RRAD,RPS6KA1,F3,MAPK3
16	REACTOME_EXTRACELLULAR_MATRIX_ORGANIZATION	0.00108932	0.0175605	0.523837	2.20579	0	210	FN1,MMP9,CTSD,COL4A2,LAMC2,MMP2,SPARC,ICAM1,LAMA3,SERPINE1,ACTN1,NID1,PDGFB,CAPN1,AGRN,ADAM19,MMP13,ADAMTS1,CDH1,DDR1,P4HB,THBS1,ITGA5,LAMB3,DAG1,FBLN1,P3H2,ITGA3,COL17A1,TIMP2,MMP1,PLOD3,CD47,ITGB5,MMP15,HSPG2,ITGB4,FURIN,CEACAM1,PLOD1,CASK,MMP10,LTBP2,LOXL2,BMP2,LOXL4,APP,BMP1,ADAM8,PXDN,LTBP3,PLEC,SDC1,CAPNS1,COL9A2,TGFB1,BSG,TGFB2,F11R,LAMC1,LTBP1,CAPN14,LAMA1,COL18A1,CD151,ITGA1,COL16A1,CAPN…
17	REACTOME_NEGATIVE_REGULATORS_OF_DDX58_IFIH1_SIGNALING	0.00142857	0.0175605	0.67523	2.20219	0	35	ISG15,IFIH1,DDX58,TRIM25,NLRC5,TNFAIP3,HERC5,UBE2L6,OTUD5,UBE2D2,TRAF3,UBA7,PCBP2,CYLD,MAVS
18	REACTOME_PARASITE_INFECTION	0.00135501	0.0175605	0.633407	2.18701	0	49	ACTG1,MYO1C,ACTB,MYH9,MYO10,ABL1,GRB2,WASL,SRC,WIPF2,WASF2,VAV2,DOCK1,BAIAP2,NCKAP1,VAV1,FYN,MYO9B,YES1,CRK,ARPC4,WASF1,LYN,WASF3
19	REACTOME_ANTIVIRAL_MECHANISM_BY_IFN_STIMULATED_GENES	0.00126103	0.0175605	0.579005	2.16502	0	81	OAS3,ISG15,OAS2,IFIT1,OAS1,DDX58,TRIM25,STAT1,EIF2AK2,MX1,USP18,MX2,OASL,HERC5,FLNA,EIF4G1,UBE2L6,KPNB1,UBA7,POM121C,FLNB
20	REACTOME_CELL_CELL_JUNCTION_ORGANIZATION	0.00134953	0.0175605	0.626654	2.16455	0	48	JUP,ACTG1,ACTB,NECTIN2,CLDN4,CLDN23,CDH1,PVR,CLDN7,CLDN5,CLDN3,CDH6,CDH2,NECTIN4,SDK2,PARD6B,CDH3,CDH11,PARD3,F11R
21	REACTOME_SIGNALING_BY_SCF_KIT	0.00141643	0.0175605	0.651339	2.16238	0	39	STAT1,MMP9,SOCS1,GRB10,GRB2,STAT5A,JAK2,SRC,SH2B2,PTPRU,STAT3,GAB2,SH2B3,VAV1,FYN,YES1,HRAS,STAT5B,LYN,CBL,KRAS,GRB7
22	REACTOME_GROWTH_HORMONE_RECEPTOR_SIGNALING	0.00155521	0.0178255	0.765025	2.16153	0	19	STAT1,SOCS1,IRS2,STAT5A,JAK2,STAT3,CISH,SOCS3,SOCS2,IRS1,STAT5B,LYN,MAPK3,PTPN1,MAPK1
23	REACTOME_SIGNALING_BY_INTERLEUKINS	0.00103734	0.0175605	0.495299	2.16018	0	363	JUN,CXCL10,PTGS2,FN1,STAT1,MMP9,CCL5,IL36RN,PIM1,JUNB,PRKACA,STAT2,SOCS1,MMP2,TP53,ICAM1,LGALS9,SMARCA4,FOS,RELA,CSF1,CCND1,LIFR,IFNLR1,CSF2,PTK2B,CCL22,RPS6KA2,CRLF1,CNN2,ALOX15,MAP2K3,IL32,IL17C,P4HB,GRB2,IRS2,TNFRSF1A,TOLLIP,IL15RA,IRAK1,PSMA6,IRAK2,SHC1,SOX2,MMP1,STAT5A,JAK2,IL17RA,IL22RA1,NFKBIA,MCL1,CCL20,PTPN14,STX4,MAPKAPK2,HMOX1,IL1A,AKT1,STAT3,PSMD3,CISH,GAB2,VIM,PSMB9,SOCS3,APP,FSCN1,P…
24	REACTOME_TRAF6_MEDIATED_NF_KB_ACTIVATION	0.00149701	0.0175605	0.721994	2.15819	0	24	IFIH1,DDX58,TRIM25,RELA,NFKBIA,APP,NFKB2,NFKB1,NFKBIB,MAVS,NKIRAS2
25	REACTOME_NON_INTEGRIN_MEMBRANE_ECM_INTERACTIONS	0.00135501	0.0175605	0.625005	2.158	0	49	FN1,COL4A2,LAMC2,LAMA3,ACTN1,PDGFB,AGRN,DDR1,THBS1,LAMB3,DAG1,ITGB5,HSPG2,ITGB4,CASK,SDC1,TGFB1,LAMC1,LAMA1,SDC3,NTN4,ITGB3,TNC,ITGAV,LAMB1,COL4A1,SDC4
26	REACTOME_CHEMOKINE_RECEPTORS_BIND_CHEMOKINES	0.00147059	0.0175605	0.696158	2.15479	0	27	CXCL10,CXCL9,CXCL11,CCL5,CXCL16,CX3CL1,CCL22,CCL20,CXCL3,CCL28,CXCL13,ACKR2,CXCL5
27	REACTOME_INTERLEUKIN_2_FAMILY_SIGNALING	0.00145985	0.0175605	0.671097	2.14486	0	31	STAT1,LGALS9,CSF2,PTK2B,GRB2,IL15RA,SHC1,STAT5A,JAK2,STAT3,GAB2,INPP5D,JAK1,STAT5B
28	REACTOME_INTERLEUKIN_10_SIGNALING	0.00147493	0.0175605	0.68838	2.13947	0	28	CXCL10,PTGS2,CCL5,ICAM1,CSF1,CSF2,CCL22,TNFRSF1A,CCL20,IL1A,STAT3,LIF,IL1RN,PTAFR,JAK1,CD86,IL1B
29	REACTOME_OAS_ANTIVIRAL_RESPONSE	0.0017094	0.017999	0.92238	2.13322	0	9	OAS3,OAS2,OAS1,DDX58,OASL,FLNA
30	REACTOME_MET_PROMOTES_CELL_MOTILITY	0.00144718	0.0175605	0.654956	2.12137	0	34	FN1,LAMC2,LAMA3,GRB2,LAMB3,ITGA3,SRC,TNS3,RAPGEF1,LAMC1,LAMA1,MET,CRK,COL27A1
31	REACTOME_REGULATION_OF_RUNX1_EXPRESSION_AND_ACTIVITY	0.00158228	0.0178255	0.765993	2.11956	0	17	PML,CCND1,MOV10,CCND3,SRC,CDK6,TNRC6B,AGO2,CCND2,TNRC6C,RUNX1,AGO1
32	REACTOME_RAC3_GTPASE_CYCLE	0.00125471	0.0175605	0.563078	2.11767	0	84	ARHGAP17,CDC42EP1,EMD,ARHGAP1,ARHGAP26,PAK4,IL32,EPHA2,NCF1,TRIO,JAG1,WASF2,VAV2,BAIAP2,ARHGAP35,NCKAP1,AMIGO2,RAPGEF1,CAV1,ESYT1,ABR,BAIAP2L1,BCR,WASF1,VANGL1,PAK2,PGRMC2,ABL2,LAMTOR1,ARAP3,RAC3,FERMT2,SNAP23,TAOK3,ARHGAP21,ERBIN,SRGAP2,ARHGAP32,TFRC,ARAP2,NCF4,OPHN1,DSG2,NOXA1
33	REACTOME_FORMATION_OF_THE_CORNIFIED_ENVELOPE	0.00129032	0.0175605	0.582529	2.11461	0	65	JUP,PPL,PKP3,CAPN1,ST14,KRT6B,PCSK6,FURIN,KRT78,KRT10,KLK13,IVL,EVPL,CAPNS1,KRT17,KLK5,DSP,KRT19,KRT80,SPRR3,KRT7,SPRR2D,FLG,SPRR2F,TGM1,PKP2,PKP1,PRSS8,SPRR1A,DSC2,KRT6A,RPTN,KRT5,KRT4,KRT39,DSG2,PKP4,KRT40,KLK12,SPINK5,KRT8,KRT33A,CSTA,KRT13,SPRR2E,KRT23,KLK8
34	REACTOME_FCGAMMA_RECEPTOR_FCGR_DEPENDENT_PHAGOCYTOSIS	0.00125786	0.0175605	0.571481	2.11319	0	73	ACTG1,MYO1C,PRKCD,ACTB,MYH9,MYO10,ABL1,GRB2,WASL,SRC,WIPF2,WASF2,VAV2,PLD3,DOCK1,LIMK1,BAIAP2,AHCYL1,NCKAP1,VAV1,PLD2,FYN,CFL1,ITPR1,MYO9B,YES1,CRK,ARPC4,ITPR2,WASF1,ITPR3,LYN,WASF3
35	REACTOME_REGULATION_OF_INSULIN_LIKE_GROWTH_FACTOR_IGF_TRANSPORT_AND_UPTAKE_BY_INSULIN_LIKE_GROWTH_FACTOR_BINDING_PROTEINS_IGFBPS	0.00124069	0.0175605	0.556454	2.10938	0	87	FN1,CCN1,MMP2,SHISA5,IGFBP4,CSF1,FSTL3,QSOX1,TMEM132A,MFGE8,P4HB,PRKCSH,GAS6,MELTF,VWA1,MMP1,STC2,APOL1,FSTL1,KLK1,CDH2,KLK13,CKAP4,APP,IGFBP2,MBTPS1,WFS1,NUCB1,PAPPA,FAM20C,LAMC1,LTBP1
36	REACTOME_KERATINIZATION	0.00128866	0.0175605	0.574503	2.09636	0	67	JUP,PPL,PKP3,CAPN1,ST14,KRT6B,PCSK6,FURIN,KRT78,KRT10,KLK13,IVL,EVPL,CAPNS1,KRT17,KLK5,DSP,KRT19,KRT80,SPRR3,KRT7,SPRR2D,FLG,SPRR2F,TGM1,PKP2,PKP1,PRSS8,SPRR1A,DSC2,KRT6A,RPTN,KRT5,KRT4,KRT39,DSG2,PKP4,KRT40,KLK12,SPINK5,KRT8,KRT33A,CSTA,KRT13,SPRR2E,KRT23,KLK8
37	REACTOME_RIP_MEDIATED_NFKB_ACTIVATION_VIA_ZBP1	0.00158228	0.0178255	0.756034	2.092	0	17	TICAM1,RELA,ZBP1,NFKBIA,RIPK1,TLR3,NFKB2,NFKB1,NFKBIB,MYD88,NKIRAS2
38	REACTOME_ADHERENS_JUNCTIONS_INTERACTIONS	0.00151515	0.0175605	0.709148	2.08599	0	23	JUP,ACTG1,ACTB,NECTIN2,CDH1,PVR,CDH6,CDH2,NECTIN4,CDH3,CDH11
39	REACTOME_NEGATIVE_REGULATION_OF_THE_PI3K_AKT_NETWORK	0.00125471	0.0175605	0.554043	2.08369	0	84	PDGFB,GRB2,IRS2,EREG,IRAK1,IER3,PIK3AP1,RHOG,SRC,AKT1,GAB2,PHLPP2,INSR,PPP2R1A,NRG2,PIP5K1C,TRIB3,STRN,VAV1,FGF1,FYN,PPP2CB,EGFR,RAC2,MET,EPGN,MYD88,IRS1,PIP4K2B,PIP5K1A,EGF,PPP2R5B,PHLPP1,PPP2R5A,CD86,ESR1,PIP4K2C,ERBB2,MAPK3,PIP4K2A,AKT2,PIK3CA,MAPK1,AREG,TGFA
40	REACTOME_HEMOSTASIS	0.00103093	0.0175605	0.473012	2.07508	0	432	FN1,WEE1,PLAU,CAPZB,PRKACA,GNB2,RHOB,TP53,SPARC,TOR4A,IRF1,SERPINE1,MAFF,ACTN1,PRKCD,FLNA,SLC7A11,PDGFB,EHD2,GATA6,ACTB,KIF13B,TLN1,STIM1,ECM1,ACTN4,QSOX1,EHD1,ORAI1,WDR1,PLAUR,CSK,GTPBP2,ABL1,GRB2,TNFRSF10B,THBS1,ITGA5,BCAR1,GNB4,GAS6,KIF26B,KIF1C,TUBB2A,GNB1,GNG4,GNAI2,ITPK1,ITGA3,ABHD12,SHC1,MMP1,GNA15,JAK2,LGALS3BP,RHOG,CD47,SRC,SH2B2,RCOR1,PRKCZ,GNAS,GNA11,KCNMA1,STX4,CEACAM1,CD99,TNFRSF10A,…
41	REACTOME_PEPTIDE_LIGAND_BINDING_RECEPTORS	0.00130378	0.0175605	0.573248	2.06898	0	63	CXCL10,CXCL9,CXCL11,CCL5,CXCL16,ECE1,CX3CL1,CCL22,C5AR2,CCL20,APP,EDN1,CXCL3,CCL28,CXCL13,NPFFR2,ACKR2,CXCL5,EDNRA,ANXA1,ACKR4,C3,HEBP1,F2RL1
42	REACTOME_RORA_ACTIVATES_GENE_EXPRESSION	0.0015674	0.0178255	0.738036	2.06591	0	18	HELZ2,TBL1X,SREBF1,CARM1,CREBBP,EP300,RXRA,NCOA1,NCOA2,NCOA6,PPARA,CPT1A
43	REACTOME_CELL_SURFACE_INTERACTIONS_AT_THE_VASCULAR_WALL	0.00121507	0.0175605	0.533407	2.05101	0	94	FN1,SLC7A11,GRB2,TNFRSF10B,ITGA5,GAS6,ITGA3,SHC1,MMP1,CD47,SRC,CEACAM1,CD99,TNFRSF10A,SLC16A3,SIRPA,TREM1,INPP5D,SDC1,TGFB1,EPCAM,BSG,CAV1,F11R,FYN,GLG1,YES1,CD177,HRAS,SDC3,ESAM,LYN,ITGB2,CD74,THBD,MERTK,PICK1,ANGPT2,KRAS,ITGB3,GRB7,PSG1,ITGAV,SLC3A2,SDC4,PIK3CA,SLC7A5
44	REACTOME_ESR_MEDIATED_SIGNALING	0.00109529	0.0175605	0.493254	2.04616	0	176	JUN,MMP9,FOSB,CTSD,GNB2,MMP2,FOS,SPHK1,GTF2F1,CCND1,PPP5C,CXXC5,GNB4,EREG,GNB1,H2BC21,GNG4,GNAI2,SHC1,USF2,POLR2A,MOV10,SRC,PRKCZ,JUND,SRF,AKT1,TNRC6B,CARM1,ZNF217,AXIN1,KDM4B,CREBBP,STRN,NCOA3,EP300,FOXO3,CAV1,YY1,AGO2,CDKN1B,H2BC7,CDK9,EGFR,ELK1,NCOA1,EPGN,POU2F1,H4C4,HRAS,TLE3,H2BC6,ZDHHC7,FKBP5,H3C13,GATA3,EGF,PDPK1,SP1,POLR2D,TNRC6C,IGF1R,KANK1,KAT2B,RUNX1,AGO1,ESR1,NCOA2,MAPK3,MYC,KAT5
45	REACTOME_PLATELET_ACTIVATION_SIGNALING_AND_AGGREGATION	0.00109649	0.0175605	0.490834	2.04427	0	186	FN1,GNB2,RHOB,SPARC,TOR4A,SERPINE1,ACTN1,PRKCD,FLNA,PDGFB,TLN1,ECM1,ACTN4,QSOX1,WDR1,CSK,GTPBP2,GRB2,THBS1,BCAR1,GNB4,GAS6,GNB1,GNG4,GNAI2,ABHD12,SHC1,GNA15,LGALS3BP,RHOG,SRC,PRKCZ,GNA11,STX4,VAV2,AKT1,GNA12,MGLL,PDPN,APP,CAP1,BRPF3,DAGLA,TGFB1,RAB27B,ENDOD1,VAV1,FAM3C,TGFB2,MAPK14,FYN,CFL1,ITPR1,STXBP2,RAC2,HABP4,SERPING1,CRK,ITPR2,ITPR3,EGF,LYN,PDPK1,VEGFA,VEGFB,RAPGEF3,PCDH7,MAPK3,ARRB2,ITGB3,…
46	REACTOME_RET_SIGNALING	0.00146199	0.0175605	0.641666	2.04111	0	30	PRKACA,GRB10,GRB2,RAP1GAP,IRS2,SHC1,SRC,ARTN,GAB2,PDLIM7,DOK4,PSPN,SHC3,GRB7,PIK3CA,RET,PIK3CD,PRKACB,NRTN,SOS1
47	REACTOME_RUNX1_INTERACTS_WITH_CO_FACTORS_WHOSE_PRECISE_EFFECT_ON_RUNX1_TARGETS_IS_NOT_KNOWN	0.00144928	0.0175605	0.626127	2.04066	0	36	SMARCA4,CBX4,HIPK2,CSNK2A2,CBX6,PHC2,SMARCC1,SMARCB1,ARID1B,PCGF5,EP300,ARID1A,RING1,SMARCD1,RUNX1,SMARCC2,CBX8
48	REACTOME_RAC1_GTPASE_CYCLE	0.0011274	0.0175605	0.496611	2.0379	0	164	PKN1,ARHGAP17,CDC42EP1,EMD,ARHGAP1,ARHGDIA,ARHGEF18,ARHGAP26,PAK4,EPHA2,NCF1,ARHGAP27,WASL,WIPF2,TRIO,JAG1,PLEKHG6,PLEKHG3,WASF2,VAV2,DOCK1,BAIAP2,ARHGAP29,TAGAP,CDC42BPA,SRGAP1,ARHGAP35,DLC1,NCKAP1,AMIGO2,ARHGAP22,VAV1,PLD2,ARHGAP44,CAV1,ARHGAP23,ESYT1,ABR,BAIAP2L1,BCR,ARAP1,DOCK9,DOCK6,MYO9B,WASF1,VANGL1,PLEKHG2,SYDE2,PAK2,WASF3,FARP1,PAK6,ABL2,GMIP,LAMTOR1,ARAP3,FERMT2,ARHGAP20,SNAP23,CDC42EP4…
49	REACTOME_ESTROGEN_DEPENDENT_NUCLEAR_EVENTS_DOWNSTREAM_OF_ESR_MEMBRANE_SIGNALING	0.00149701	0.0175605	0.68098	2.03559	0	24	FOS,CCND1,EREG,SRF,AKT1,FOXO3,CDKN1B,EGFR,ELK1,EPGN,EGF,MAPK3,AKT2,BCL2,MAPK1,AREG,TGFA,BTC,XPO1,HBEGF
50	REACTOME_DOWNSTREAM_SIGNAL_TRANSDUCTION	0.00147059	0.0175605	0.65694	2.03341	0	27	STAT1,NCK2,PDGFB,GRB2,BCAR1,STAT5A,SRC,RASA1,STAT3,RAPGEF1,CRK,HRAS,STAT5B,KRAS,GRB7,PIK3CA,STAT6
51	REACTOME_INTEGRIN_SIGNALING	0.00310078	0.0230683	0.705543	2.03227	1	21	FN1,TLN1,CSK,GRB2,BCAR1,SHC1,SRC,AKT1,CRK,PDPK1,RAPGEF3,ITGB3,PTPN1
52	REACTOME_VEGFR2_MEDIATED_CELL_PROLIFERATION	0.0031348	0.0230683	0.725688	2.03135	1	18	PRKCD,SPHK1,SRC,RASA1,PRKCZ,AHCYL1,ITPR1,HRAS,ITPR2,ITPR3,PDPK1,VEGFA,KDR,KRAS
53	REACTOME_PLASMA_LIPOPROTEIN_ASSEMBLY_REMODELING_AND_CLEARANCE	0.00134953	0.0175605	0.587391	2.02893	0	48	PRKACA,LSR,AP2A1,AP2A2,LDLR,CLTA,P4HB,SCARB1,LIPG,LMF2,PCSK6,LMF1,FURIN,NPC1,LDLRAP1,BMP1,MBTPS1,ANGPTL4,PLTP,VLDLR,ABCA1,ABCG1,NR1H2
54	REACTOME_ANTI_INFLAMMATORY_RESPONSE_FAVOURING_LEISHMANIA_PARASITE_INFECTION	0.00125786	0.0175605	0.546361	2.0203	0	73	PRKACA,GNB2,MYH9,RHBDF2,ADRB1,GNB4,GNB1,GNG4,GNAI2,SRC,ADM,GNAS,ADM2,FURIN,AHCYL1,ADCY9,PRKX,MAPK14,ADCY7,FYN,ITPR1,YES1,ADRB2,ITPR2,ITPR3,PTGER4,LYN,SCTR,ADCY5,PRKAR1B,ADCY4
55	REACTOME_CD28_CO_STIMULATION	0.00147493	0.0175605	0.649499	2.01863	0	28	GRB2,SRC,AKT1,MAP3K14,TRIB3,VAV1,MAPKAP1,FYN,MAP3K8,YES1,MTOR,PAK2,LYN,PDPK1,CD86,AKT2,MLST8,PIK3CA,RICTOR
56	REACTOME_RHOQ_GTPASE_CYCLE	0.00130208	0.0175605	0.565843	2.01657	0	57	ARHGAP17,CDC42EP1,JUP,ARHGAP1,ARHGAP26,PAK4,CDC42BPB,TRIP10,WASL,PLEKHG3,SCRIB,CDC42BPA,ARHGAP35,DLC1,ITSN1,CAV1,CDC42EP3,WWP2,GFOD1,VANGL1,FNBP1,PAK2,LAMTOR1,SNAP23,CDC42EP4,ARHGAP21,SRGAP2,ARHGAP32,TFRC,ARHGEF7,OPHN1,STEAP3
57	REACTOME_MYD88_INDEPENDENT_TLR4_CASCADE	0.00121065	0.0175605	0.523675	2.01588	0	95	JUN,IRF7,TICAM1,FOS,RELA,UBE2D2,RPS6KA2,MAP2K3,IRAK1,IRAK2,BIRC3,TRAF3,NFKBIA,MAPKAPK2,RIPK1,APP,PPP2R1A,TAB1,NOD2,NFKB2,DUSP4,NFKB1,MAPK14,NFKBIB,TAB2,DUSP6,TNIP2,PPP2CB,ELK1,MAP3K8,TAB3,NKIRAS2,NOD1,MAP2K7,RPS6KA1,IRF3,RIPK2,MAPK3,FADD
58	REACTOME_ACTIVATION_OF_MATRIX_METALLOPROTEINASES	0.00310078	0.0230683	0.698997	2.01342	1	21	MMP9,MMP2,MMP13,TIMP2,MMP1,MMP15,FURIN,MMP10,COL18A1,MMP14
59	REACTOME_SEMA3A_PLEXIN_REPULSION_SIGNALING_BY_INHIBITING_INTEGRIN_ADHESION	0.00165017	0.0179611	0.788197	2.01287	0	13	TLN1,RND1,PLXNA1,RRAS,NRP1,PLXNA2,PIP5K1C,FYN
60	REACTOME_ZBP1_DAI_MEDIATED_INDUCTION_OF_TYPE_I_IFNS	0.00307692	0.0230683	0.702474	2.01109	1	20	TICAM1,RELA,ZBP1,NFKBIA,RIPK1,TLR3,NFKB2,NFKB1,NFKBIB,MYD88,NKIRAS2,IRF3,DTX4,IKBKG
61	REACTOME_SIGNALLING_TO_ERKS	0.00145985	0.0175605	0.628452	2.00857	0	31	MAP2K2,GRB2,SHC1,SRC,MAPKAPK2,RALB,RAPGEF1,MAPK14,MAPK13,CRK,HRAS,MAPK3,SHC3,KRAS,MAPK1,SHC2,MAP2K1,CRKL
62	REACTOME_RHOD_GTPASE_CYCLE	0.00134228	0.0175605	0.578101	2.00782	0	50	CAPZB,ARHGAP17,ACTN1,EMD,ARHGAP1,ARHGAP26,EFHD2,WHAMM,AKAP12,ANKFY1,DBN1,PLXNA1,VAPB,ARHGAP35,DIAPH1,CAV1,ESYT1,VANGL1,PAK6,PGRMC2
63	REACTOME_OVARIAN_TUMOR_DOMAIN_PROTEASES	0.00142857	0.0175605	0.609008	2.00589	0	38	IFIH1,DDX58,TRIM25,TNFAIP3,TNIP1,TP53,OTUD5,TRAF3,RIPK1,TNIP3,NOD2,OTUD7B,TNIP2,MAVS,NOD1,VCPIP1,ESR1,RIPK2,OTUB2
64	REACTOME_DEGRADATION_OF_THE_EXTRACELLULAR_MATRIX	0.00119904	0.0175605	0.516973	1.99834	0	98	FN1,MMP9,CTSD,COL4A2,LAMC2,MMP2,LAMA3,NID1,CAPN1,MMP13,ADAMTS1,CDH1,LAMB3,COL17A1,TIMP2,MMP1,MMP15,HSPG2,FURIN,MMP10,BMP1,ADAM8,CAPNS1,COL9A2,BSG,LAMC1,CAPN14,COL18A1,COL16A1,CAPN2,MMP14,NCSTN,CAPN5,TLL2,ADAM15,COL8A1,LAMB1,COL4A1,CTSV,CAPN15
65	REACTOME_CLASS_B_2_SECRETIN_FAMILY_RECEPTORS	0.00138504	0.0175605	0.597285	1.99735	0	40	WNT7A,GNB2,GNB4,GNB1,WNT7B,ADGRE2,GNG4,FZD5,ADM,FZD1,GNAS,ADGRE5,ADM2
66	REACTOME_ECM_PROTEOGLYCANS	0.00134409	0.0175605	0.584302	1.99577	0	44	FN1,COL4A2,SPARC,LAMA3,SERPINE1,AGRN,DAG1,ITGB5,HSPG2,APP,COL9A2,TGFB1,TGFB2,LAMC1,LAMA1,ITGB6,ITGB3,TNC,ITGAV,LAMB1,COL4A1
67	REACTOME_RAF_INDEPENDENT_MAPK1_3_ACTIVATION	0.00151515	0.0175605	0.678302	1.99525	0	23	DUSP2,DUSP5,DUSP8,DUSP1,MAP2K2,PEA15,JAK2,DUSP10,DUSP4,DUSP9,DUSP6,DUSP16,JAK1
68	REACTOME_SEMA4D_IN_SEMAPHORIN_SIGNALING	0.00149701	0.0175605	0.666787	1.99316	0	24	RHOB,MYH14,MYL9,MYH9,RND1,RRAS,LIMK1,ARHGAP35,MET,RHOC,ERBB2,MYH10,ROCK1,ARHGEF11
69	REACTOME_INTRACELLULAR_SIGNALING_BY_SECOND_MESSENGERS	0.0010661	0.0175605	0.464592	1.98889	0	266	JUN,EGR1,PML,PRKACA,TP53,PRKCD,CBX4,GATAD2A,PDGFB,CSNK2A2,GRB2,IRS2,EREG,GATAD2B,AKT1S1,IRAK1,MAF1,NR4A1,CBX6,PHC2,PSMA6,IER3,PIK3AP1,RHOG,MOV10,SRC,RCOR1,SNAI2,MTA2,HDAC5,AKT1,PSMD3,TNRC6B,RRAGC,GAB2,PSMB9,RRAGD,PHLPP2,INSR,PPP2R1A,NRG2,PIP5K1C,AHCYL1,PSMB10,TRIB3,CDKN1A,STRN,GRK2,ADCY9,PRKX,RBBP7,VAV1,FGF1,FOXO3,MAPKAP1,ADCY7,AGO2,RRAGA,RHEB,CDKN1B,FYN,MDM2,PPP2CB,WWP2,EGFR,PSMF1,ITPR1,HDAC7,RA…
70	REACTOME_NEGATIVE_REGULATION_OF_MAPK_PATHWAY	0.00137363	0.0175605	0.588371	1.98861	0	42	DUSP2,DUSP5,DUSP8,DUSP1,MAP2K2,ARAF,PAQR3,PPP5C,BRAP,DUSP10,PPP2R1A,DUSP4,DUSP9,DUSP6,PPP2CB,DUSP16,HRAS,PPP2R5B,PPP2R5A,MAPK3,KRAS
71	REACTOME_CDC42_GTPASE_CYCLE	0.00118064	0.0175605	0.495995	1.98784	0	138	ARHGAP17,CDC42EP1,JUP,ARHGAP1,ARHGDIA,ARHGAP26,PAK4,CDC42EP5,FMNL3,CDC42BPB,ARHGAP27,WASL,WIPF2,TRIO,PLEKHG3,VAV2,BAIAP2,MAP3K11,ARHGAP29,TAGAP,SCRIB,CDC42BPA,SRGAP1,ARHGAP35,DLC1,ARHGAP22,WDR81,ITSN1,ARHGAP44,CAV1,FGD2,CDC42EP3,ABR,BCR,ARAP1,DOCK9,DOCK6,MYO9B,SHKBP1,VANGL1,FNBP1,PLEKHG2,PAK2,FARP1,PAK6,GMIP,LAMTOR1,ARAP3,ARHGAP20,ARHGEF16,SNAP23,SH3PXD2A,CDC42EP4,FGD1,PLEKHG4B,ARHGEF11,PARD6A,AR…
72	REACTOME_SIGNALING_BY_GPCR	0.00104932	0.0175605	0.457758	1.98739	0	345	CXCL10,WNT7A,CXCL9,CXCL11,CCL5,PRKACA,GNB2,RHOB,CXCL16,ECE1,PRKCD,CX3CL1,ARHGEF18,CCL22,RPS6KA2,ADRB1,PLCB3,GRB2,GNB4,GNB1,WNT7B,PLPPR3,ADGRE2,GNG4,GNAI2,C5AR2,FZD5,ABHD12,GNA15,SRC,TRIO,ADM,FZD1,CCL20,GNAS,ADGRE5,GNA11,ARHGEF40,ARHGEF37,ADM2,ARHGEF10L,VAV2,AKT1,GNA12,MGLL,RGS19,GPSM1,GPSM3,AKAP13,APP,S1PR2,PPP2R1A,RGS20,EDN1,AHCYL1,CXCL3,CCL28,GRK2,ADCY9,GRK6,DAGLA,PRKX,CXCL13,VAV1,ITSN1,RGS12,A…
73	REACTOME_PLATELET_AGGREGATION_PLUG_FORMATION	0.00151515	0.0175605	0.672963	1.97955	0	23	FN1,TLN1,CSK,GRB2,BCAR1,SHC1,SRC,AKT1,CRK,PDPK1,RAPGEF3,ITGB3,PTPN1
74	REACTOME_MET_ACTIVATES_PTK2_SIGNALING	0.00151515	0.0175605	0.672707	1.97879	0	23	FN1,LAMC2,LAMA3,LAMB3,ITGA3,SRC,LAMC1,LAMA1,MET,COL27A1
75	REACTOME_RHOB_GTPASE_CYCLE	0.00130378	0.0175605	0.546664	1.97569	0	64	PKN1,RHOB,JUP,ARHGAP1,ARHGAP26,STK10,CAVIN1,TJP2,ARHGEF10L,VAV2,RTKN,RHPN2,AKAP13,ARHGAP35,DLC1,DIAPH1,CAV1,ABR,BCR,MYO9B,VANGL1,ARHGEF1,PCDH7,SNAP23,PKN3,ROCK1,ARHGEF11,ARHGAP21,ARHGEF5,ERBIN,ARHGAP32,TFRC,OPHN1
76	REACTOME_SEMAPHORIN_INTERACTIONS	0.00130208	0.0175605	0.551086	1.97127	0	58	SEMA7A,RHOB,MYH14,MYL9,MYH9,TLN1,RND1,PLXNA1,RRAS,NRP1,LIMK1,PLXNA2,PIP5K1C,ARHGAP35,FYN,CFL1,MET,ITGA1,RHOC,PAK2,ERBB2,MYH10,PLXND1,ROCK1,CDK5R1,ARHGEF11
77	REACTOME_ACTIVATION_OF_GENE_EXPRESSION_BY_SREBF_SREBP	0.00137363	0.0175605	0.582966	1.97034	0	42	HELZ2,FASN,TBL1X,SREBF2,SREBF1,CARM1,ELOVL6,CREBBP,LSS,MVK,RXRA,NCOA1,ACACA,MTF1,SP1,NCOA2,NCOA6,PPARA
78	REACTOME_TRAF3_DEPENDENT_IRF_ACTIVATION_PATHWAY	0.0016	0.0179	0.755701	1.96967	0	14	IFIH1,IRF7,DDX58,TRIM25,TRAF3,CREBBP,EP300,MAVS,IRF3
79	REACTOME_DISEASES_OF_IMMUNE_SYSTEM	0.00299401	0.0230683	0.651978	1.96965	1	25	TICAM1,UNC93B1,RELA,TRAF3,NFKBIA,TLR2,TLR3,NFKB2,NFKB1,MYD88
80	REACTOME_EPH_EPHRIN_SIGNALING	0.00126263	0.0175605	0.524833	1.96785	0	83	MMP9,NCK2,MMP2,ACTG1,MYH14,MYL9,ACTB,MYH9,AP2A1,AP2A2,CLTA,EPHB4,APH1A,EPHB2,EPHA2,WASL,SRC,RASA1,VAV2,LIMK1,ITSN1,FYN,CFL1,YES1,ARPC4,HRAS,PAK2,LYN,EFNA5,EPHA10,NCSTN,EPHB3
81	REACTOME_RHOC_GTPASE_CYCLE	0.00126263	0.0175605	0.531851	1.96761	0	72	PKN1,JUP,ARHGAP1,ARHGDIA,ARHGAP26,STK10,FMNL3,CAVIN1,TJP2,ARHGEF40,ARHGEF10L,VAV2,VAPB,RTKN,AKAP13,ARHGAP35,DLC1,DIAPH1,CAV1,ABR,BCR,MYO9B,RHOC,VANGL1,ARHGEF1,PKN3,ROCK1,ARHGEF11,ACBD5,ARHGAP21,ARHGEF5,ERBIN,ARHGAP32,TFRC,OPHN1
82	REACTOME_BMAL1_CLOCK_NPAS2_ACTIVATES_CIRCADIAN_GENE_EXPRESSION	0.00299401	0.0230683	0.647469	1.95603	1	25	HELZ2,NOCT,SERPINE1,BHLHE41,DBP,TBL1X,CARM1,CREBBP,ARNTL2,RXRA,NCOA1,NCOA2,NCOA6,PPARA,NAMPT
83	REACTOME_SIGNALING_BY_LEPTIN	0.00167785	0.0179611	0.816872	1.95578	0	10	IRS2,STAT5A,JAK2,STAT3,SOCS3,LEPR,IRS1,STAT5B
84	REACTOME_COSTIMULATION_BY_THE_CD28_FAMILY	0.00132275	0.0175605	0.558619	1.95493	0	52	CD274,CSK,GRB2,SRC,PDCD1LG2,AKT1,MAP3K14,PPP2R1A,TRIB3,VAV1,MAPKAP1,FYN,PPP2CB,MAP3K8,YES1,MTOR,PAK2,PPP2R5B,LYN,PDPK1,PPP2R5A,CD86,HLA-DPB1
85	REACTOME_REGULATION_OF_PTEN_GENE_TRANSCRIPTION	0.00130719	0.0175605	0.546781	1.95217	0	59	JUN,EGR1,TP53,CBX4,GATAD2A,GATAD2B,MAF1,CBX6,PHC2,RCOR1,SNAI2,MTA2,HDAC5,RRAGC,RRAGD,RBBP7,RRAGA,RHEB,HDAC7,RING1,MTOR,RPTOR,LAMTOR1,MAPK3,CBX8
86	REACTOME_ANTIGEN_ACTIVATES_B_CELL_RECEPTOR_BCR_LEADING_TO_GENERATION_OF_SECOND_MESSENGERS	0.00299401	0.0230683	0.652632	1.95085	1	24	STIM1,ORAI1,GRB2,SH3KBP1,PIK3AP1,AHCYL1,VAV1,FYN,ITPR1,ITPR2,ITPR3,LYN
87	REACTOME_ONCOGENIC_MAPK_SIGNALING	0.00125945	0.0175605	0.525605	1.94826	0	74	FN1,ZC3HAV1,ACTG1,DUSP8,ACTB,LMNA,QKI,TLN1,MAP2K2,ARAF,CSK,SPRED1,SPRED3,BRAP,JAK2,SRC,DUSP10,MAP3K11,DUSP9,DUSP6,DUSP16,FAM131B,SND1,HRAS,MAPK3,SPRED2,MPRIP,ARRB2,KRAS,ITGB3,ARRB1
88	REACTOME_SIGNALING_BY_KIT_IN_DISEASE	0.00311042	0.0230683	0.689387	1.94782	1	19	STAT1,GRB2,STAT5A,JAK2,SRC,STAT3,FYN,YES1,HRAS,STAT5B,LYN,KRAS,PIK3CA
89	REACTOME_FLT3_SIGNALING	0.00293686	0.0230683	0.60625	1.94722	1	32	CSK,GRB10,GRB2,STAT5A,PTPRJ,AKT1,GAB2,SH2B3,FOXO3,CDKN1B,FYN,SOCS2,HRAS,STAT5B,ABL2,CBL,KRAS,AKT2,PIK3CA
90	REACTOME_SIGNALING_BY_MET	0.0012837	0.0175605	0.529425	1.94549	0	69	FN1,LAMC2,LAMA3,SPINT1,GRB2,SH3KBP1,LAMB3,SH3GL1,ITGA3,SHC1,SRC,PTPRJ,STAT3,TNS3,ARF6,MUC20,RAPGEF1,LAMC1,LAMA1,MET,CRK,HRAS,COL27A1,CBL,KRAS,PTPN1,LAMB1
91	REACTOME_LAMININ_INTERACTIONS	0.00290276	0.0230683	0.615586	1.94312	1	29	COL4A2,LAMC2,LAMA3,NID1,LAMB3,ITGA3,HSPG2,ITGB4,LAMC1,LAMA1,COL18A1,ITGA1,ITGAV,LAMB1,COL4A1
92	REACTOME_TOLL_LIKE_RECEPTOR_TLR1_TLR2_CASCADE	0.00121507	0.0175605	0.504858	1.94123	0	94	JUN,SOCS1,FOS,RELA,RPS6KA2,MAP2K3,ECSIT,IRAK1,IRAK2,NFKBIA,MAPKAPK2,APP,PPP2R1A,TLR2,TAB1,NOD2,NFKB2,DUSP4,NFKB1,MAPK14,NFKBIB,TAB2,DUSP6,TNIP2,PPP2CB,ELK1,MAP3K8,TAB3,MYD88,PELI3,NKIRAS2,NOD1,MAP2K7,RPS6KA1,RIPK2,MAPK3
93	REACTOME_MAPK_FAMILY_SIGNALING_CASCADES	0.00107066	0.0175605	0.454001	1.94048	0	261	JUN,FN1,DUSP2,DUSP5,PRKACA,MMP2,ACTG1,DUSP8,PDGFB,ACTB,DUSP1,TLN1,CSF2,MAP2K2,ARAF,CDC42EP5,PAQR3,PEA15,CSK,SPRED1,SPRED3,PPP5C,GRB2,IRS2,EREG,BRAP,PSMA6,SHC1,RASGRP3,JAK2,MOV10,CCND3,SRC,RASA1,ARTN,RAPGEF2,PSMD3,TNRC6B,ZDHHC9,MMP10,DUSP10,PSMB9,ABHD17A,MAP3K11,PPP2R1A,DNAJB1,RCE1,NRG2,CUL3,PSMB10,DUSP4,ETV4,DAB2IP,NCOA3,DUSP9,FGF1,FOXO3,SPTBN1,AGO2,FYN,CDC42EP3,DUSP6,PPP2CB,DUSP16,EGFR,PSMF1,MET…
94	REACTOME_TOLL_LIKE_RECEPTOR_9_TLR9_CASCADE	0.00124844	0.0175605	0.510828	1.93557	0	89	JUN,IRF7,TICAM1,FOS,RELA,RPS6KA2,MAP2K3,ECSIT,IRAK1,IRAK2,NFKBIA,MAPKAPK2,APP,PPP2R1A,TAB1,NOD2,NFKB2,DUSP4,NFKB1,MAPK14,NFKBIB,TAB2,DUSP6,TNIP2,PPP2CB,ELK1,MAP3K8,TAB3,MYD88,PELI3,NKIRAS2,NOD1,MAP2K7,RPS6KA1,RIPK2,MAPK3,EEA1
95	REACTOME_INNATE_IMMUNE_SYSTEM	0.001001	0.0175605	0.430439	1.93465	0	796	JUN,ISG15,IFIH1,IRF7,DDX58,TRIM25,MMP9,NLRC5,TNFAIP3,PLAU,BST2,CARD11,HERC5,CTSD,PRKACA,ATP6V0D1,SOCS1,DHX58,TICAM1,TMBIM1,HSPA6,CD81,JUP,ACTG1,LTF,UNC93B1,MYO1C,HLA-A,PRKCD,RAP2B,FOS,RELA,HSPA1A,CAPN1,COTL1,ACTB,AGPAT2,MYH9,EEF2,AP1M1,MVP,CTSA,UBE2L6,LAMP1,FTH1,AP2A2,MYO10,OTUD5,QSOX1,UBE2D2,IGF2R,ZBP1,CCL22,RPS6KA2,PLAUR,CNN2,MAP2K3,RELB,PDAP1,POLR3D,TRIM21,STK10,ECSIT,ABL1,GRB2,PRKCSH,TRIM56,D…
96	REACTOME_NR1H3_NR1H2_REGULATE_GENE_EXPRESSION_LINKED_TO_CHOLESTEROL_TRANSPORT_AND_EFFLUX	0.00292398	0.0230683	0.607826	1.93347	1	30	TBL1X,MOV10,ARL4C,TNRC6B,PLTP,EP300,AGO2,RXRA,NCOA1,TNRC6C,AGO1,ABCA1,ABCG1,NR1H2,NCOR2,TNRC6A
97	REACTOME_COLLAGEN_DEGRADATION	0.00138504	0.0175605	0.577562	1.9314	0	40	MMP9,CTSD,COL4A2,MMP2,MMP13,COL17A1,MMP1,MMP15,FURIN,MMP10,COL9A2,COL18A1,COL16A1,MMP14
98	REACTOME_INTERLEUKIN_15_SIGNALING	0.0016835	0.0179611	0.775096	1.9313	0	12	GRB2,IL15RA,SHC1,STAT5A,STAT3,GAB2,JAK1,STAT5B,IL15
99	REACTOME_SIGNALLING_TO_RAS	0.0031348	0.0230683	0.689714	1.93065	1	18	GRB2,SHC1,SRC,MAPKAPK2,RALB,MAPK14,MAPK13,HRAS,SHC3,KRAS,SHC2
100	REACTOME_RAC2_GTPASE_CYCLE	0.00126103	0.0175605	0.516322	1.93063	0	81	ARHGAP17,CDC42EP1,EMD,ARHGAP1,ARHGDIA,ARHGAP26,PAK4,EPHA2,NCF1,TRIO,WASF2,VAV2,VAPB,DOCK1,ARHGAP35,NCKAP1,VAV1,PLD2,CAV1,ESYT1,ABR,BAIAP2L1,BCR,RAC2,ANKLE2,VANGL1,PAK2,PGRMC2,LAMTOR1,CDC42EP4,TAOK3,ARHGAP21,PIK3CA,ERBIN,ARHGAP32,TFRC,NCF4,OPHN1,DSG2
101	REACTOME_INTERLEUKIN_20_FAMILY_SIGNALING	0.0031348	0.0230683	0.689494	1.93004	1	18	STAT1,STAT2,IFNLR1,STAT5A,JAK2,IL22RA1,STAT3,SOCS3,JAK1,STAT5B
102	REACTOME_SIGNALING_BY_CSF3_G_CSF	0.00294118	0.0230683	0.623336	1.92939	1	27	STAT1,SOCS1,UBE2D2,GRB2,SHC1,STAT5A,JAK2,STAT3,GAB2,SOCS3,JAK1,STAT5B,LYN
103	REACTOME_INTEGRIN_CELL_SURFACE_INTERACTIONS	0.00132275	0.0175605	0.551126	1.92871	0	52	FN1,COL4A2,ICAM1,AGRN,CDH1,THBS1,ITGA5,ITGA3,CD47,ITGB5,HSPG2,COL9A2,BSG,F11R,COL18A1,ITGA1,COL16A1,ITGB2,ITGB6,KDR,ITGB3,TNC,ITGAV,COL8A1,ITGB7,COL4A1,ITGB8,COL1A1,FBN1,VWF,MADCAM1
104	REACTOME_SIGNALING_BY_NUCLEAR_RECEPTORS	0.00107411	0.0175605	0.453811	1.92706	0	235	JUN,MMP9,FOSB,CTSD,GNB2,MMP2,FOS,SPHK1,GTF2F1,RARA,PPARD,CCND1,PPP5C,FASN,CXXC5,GNB4,EREG,GNB1,H2BC21,GNG4,GNAI2,SHC1,USF2,POLR2A,TBL1X,MOV10,SRC,PRKCZ,JUND,SRF,CRABP2,SREBF1,AKT1,ARL4C,TNRC6B,CARM1,ZNF217,AXIN1,KDM4B,CREBBP,STRN,NCOA3,PLTP,EP300,FOXO3,CAV1,YY1,AGO2,CDKN1B,H2BC7,RXRA,CDK9,EGFR,ELK1,NCOA1,EPGN,POU2F1,H4C4,HRAS,TLE3,H2BC6,ZDHHC7,FKBP5,H3C13,GATA3,EGF,PDPK1,SP1,POLR2D,TNRC6C,IGF1R,K…
105	REACTOME_PRESYNAPTIC_FUNCTION_OF_KAINATE_RECEPTORS	0.00167785	0.0179611	0.802008	1.92019	0	10	GNB2,PLCB3,GNB4,GNB1,GNG4
106	REACTOME_CASPASE_ACTIVATION_VIA_DEATH_RECEPTORS_IN_THE_PRESENCE_OF_LIGAND	0.0032	0.0232216	0.736634	1.91997	1	14	TICAM1,TNFRSF10B,RIPK1,TNFRSF10A,CFLAR,TNFSF10,TRADD,FADD
107	REACTOME_GPCR_LIGAND_BINDING	0.00113379	0.0175605	0.467611	1.91792	0	160	CXCL10,WNT7A,CXCL9,CXCL11,CCL5,GNB2,CXCL16,ECE1,CX3CL1,CCL22,ADRB1,GNB4,GNB1,WNT7B,PLPPR3,ADGRE2,GNG4,C5AR2,FZD5,ADM,FZD1,CCL20,GNAS,ADGRE5,ADM2,APP,S1PR2,EDN1,CXCL3,CCL28,CXCL13,WNT3,NPFFR2,ACKR2,PTAFR,DRD4,ADRB2,CXCL5,PTGER4,EDNRA,ANXA1,SCTR,ACKR4,C3,HEBP1,F2RL1,PLPPR2,HCAR3,FZD8,GRM6,FZD7,CXCL2,GPER1,NMB,SMO,LPAR2,RRH,OXTR,UCN2,GPR37L1,GPR132,WNT9A
108	REACTOME_SIGNAL_REGULATORY_PROTEIN_FAMILY_INTERACTIONS	0.00167785	0.0179611	0.801013	1.91781	0	10	PTK2B,GRB2,CD47,SRC,SIRPA
109	REACTOME_CIRCADIAN_CLOCK	0.00128866	0.0175605	0.525422	1.91727	0	67	HELZ2,NR1D1,PER1,NOCT,SERPINE1,BHLHE41,DBP,TBL1X,SREBF1,CARM1,MEF2D,CRTC3,CREBBP,CSNK1D,RAI1,EP300,ARNTL2,CRTC2,RXRA,NCOA1,CRY2,NR3C1,PPP1CA,NFIL3,NCOA2,NCOA6,PPARA,CPT1A,SIK1,NAMPT,SIRT1
110	REACTOME_TRAF6_MEDIATED_IRF7_ACTIVATION	0.0031348	0.0230683	0.704351	1.91619	1	16	IFIH1,IRF7,DDX58,TRIM25,CREBBP,EP300,MAVS,IRF3
111	REACTOME_G_ALPHA_I_SIGNALLING_EVENTS	0.00114679	0.0175605	0.471143	1.91402	0	149	CXCL10,CXCL9,CXCL11,CCL5,PRKACA,GNB2,CXCL16,PRKCD,CX3CL1,PLCB3,GNB4,GNB1,GNG4,GNAI2,GNA15,SRC,CCL20,GNAS,GNA11,RGS19,GPSM1,GPSM3,APP,S1PR2,PPP2R1A,RGS20,AHCYL1,CXCL3,CCL28,GRK2,ADCY9,PRKX,CXCL13,RGS12,ADCY7,PPP2CB,ITPR1,DRD4,ITPR2,CXCL5,CAMKK2,PPP3R1,ITPR3,ANXA1,PPP1CA,C3,PPP3CA,HEBP1,ADCY5,HCAR3,PRKAR1B,ADCY4,RGS3,RGS16,GNAZ,RGS14,RGS17,GRM6,RGS10,MAPK1,CXCL2,GPER1,LPAR2,RRH,GPR37L1,RGS9
112	REACTOME_PLASMA_LIPOPROTEIN_REMODELING	0.0031348	0.0230683	0.701704	1.90899	1	16	P4HB,LIPG,LMF2,PCSK6,LMF1,FURIN,MBTPS1,ANGPTL4,PLTP
113	REACTOME_TRANSCRIPTIONAL_REGULATION_BY_MECP2	0.00134589	0.0175605	0.553433	1.90739	0	47	PRKACA,HIPK2,GAMT,IRAK1,SOX2,TBL1X,MOV10,GPRIN1,TNRC6B,MECP2,HTT,AGO2,MET,FKBP5,TNRC6C,AGO1,NOTCH1,PTPN1,NCOR2,TNRC6A
114	REACTOME_PI3K_AKT_SIGNALING_IN_CANCER	0.00126743	0.0175605	0.511789	1.90692	0	78	PDGFB,GRB2,IRS2,EREG,AKT1S1,NR4A1,PIK3AP1,RHOG,SRC,AKT1,GAB2,NRG2,CDKN1A,STRN,VAV1,FGF1,FOXO3,MAPKAP1,CDKN1B,FYN,MDM2,EGFR,RAC2,MET,EPGN,MTOR,IRS1,RPS6KB2,EGF,PDPK1,CD86,ESR1,ERBB2
115	REACTOME_SIGNALING_BY_PDGF	0.00136426	0.0175605	0.556569	1.90666	0	46	STAT1,COL4A2,NCK2,PDGFB,GRB2,THBS1,BCAR1,STAT5A,SRC,RASA1,FURIN,STAT3,PTPN12,COL9A2,RAPGEF1,CRK,HRAS,STAT5B
116	REACTOME_SIGNALING_BY_TGFB_FAMILY_MEMBERS	0.00121065	0.0175605	0.494854	1.90493	0	95	JUNB,INHBA,SERPINE1,DRAP1,CDKN2B,FSTL3,ARHGEF18,PPP1R15A,FST,PRKCZ,SMURF1,PMEPA1,FURIN,FSTL1,BMP2,CCNK,BAMBI,UBE2M,PARD3,CGN,TGFB1,SMAD3,ACVRL1,F11R,CDK9,NEDD4L,SKI,TGIF2,TGIF1,SP1,TGFBR2,INHBB,PPP1CA,CBL,WWTR1,MAPK3,MYC,RNF111,BMPR2,SMURF2,NCOR2,USP9X,PARD6A,PPM1A,MAPK1,TRIM33,STUB1,SMAD9
117	REACTOME_NEPHRIN_FAMILY_INTERACTIONS	0.0031348	0.0230683	0.69975	1.90367	1	16	NCK2,ACTN1,ACTN4,WASL,CASK,SPTBN1,FYN,CD2AP,SPTAN1,PIK3CA
118	REACTOME_PROSTACYCLIN_SIGNALLING_THROUGH_PROSTACYCLIN_RECEPTOR	0.00167785	0.0179611	0.844805	1.90246	0	8	GNB2,GNB4,GNB1,GNG4,GNAS
119	REACTOME_FOXO_MEDIATED_TRANSCRIPTION	0.00131752	0.0175605	0.541705	1.9023	0	53	BBC3,GADD45A,KLF4,SREBF1,AKT1,DDIT3,FBXO32,PINK1,YWHAG,CITED2,SOD2,CREBBP,CDKN1A,SMAD3,EP300,FOXO3,STK11,CAV1,CCNG2,CDKN1B,NR3C1,KAT2B
120	REACTOME_RHO_GTPASE_CYCLE	0.0010395	0.0175605	0.434527	1.89966	0	415	PKN1,CAPZB,RHOB,NCK2,ARHGAP17,EPSTI1,CDC42EP1,ACTN1,JUP,ACTG1,ACTB,EMD,ARHGAP1,ARHGDIA,ARHGEF18,ARHGAP26,EFHD2,PAK4,PTK2B,WHAMM,CDC42EP5,SEMA4F,IL32,CSK,STK10,PRAG1,GRB2,FMNL3,AKAP12,ANKFY1,CDC42BPB,EPHA2,NCF1,RND1,NSFL1C,ARHGAP27,TRIP10,WASL,RHOG,SRC,MTMR1,WIPF2,TRIO,CAVIN1,JAG1,PLEKHG6,PLEKHG3,DBN1,TJP2,PLXNA1,ARHGEF40,WASF2,ARHGEF10L,ATP6AP1,VAV2,VAPB,ARHGAP8,DOCK1,RHOV,CKB,RTKN,BAIAP2,RHPN2,V…
121	REACTOME_IMMUNOREGULATORY_INTERACTIONS_BETWEEN_A_LYMPHOID_AND_A_NON_LYMPHOID_CELL	0.00133511	0.0175605	0.545547	1.89933	0	51	ICAM1,CD81,HLA-A,NECTIN2,CDH1,PVR,COL17A1,IFITM1,HLA-B,CD99,HLA-E,HLA-F,TREM1,HLA-C
122	REACTOME_PLATELET_HOMEOSTASIS	0.00131234	0.0175605	0.539095	1.89744	0	54	GNB2,STIM1,ORAI1,GNB4,GNB1,GNG4,GNAS,KCNMA1,PDE9A,PPP2R1A,MAPK14,PPP2CB,ITPR1,ITPR2,ATP2A2,ITPR3,PPP2R5B,PPP2R5A
123	REACTOME_ABERRANT_REGULATION_OF_MITOTIC_G1_S_TRANSITION_IN_CANCER_DUE_TO_RB1_DEFECTS	0.00316456	0.0230683	0.684554	1.89421	1	17	CDKN1C,CCND1,CCND3,CDK6,CDKN1A,CCND2,CDKN1B
124	REACTOME_INTERLEUKIN_3_INTERLEUKIN_5_AND_GM_CSF_SIGNALING	0.00283286	0.0230683	0.570271	1.89324	1	39	PRKACA,CSF2,GRB2,SHC1,STAT5A,JAK2,GAB2,INPP5D,RAPGEF1,VAV1,FYN,YES1,CRK,JAK1,STAT5B,LYN,CBL
125	REACTOME_O_LINKED_GLYCOSYLATION	0.00124378	0.0175605	0.501326	1.89299	0	85	GALNT2,B4GALT5,THSD7A,THSD1,ADAMTS1,THBS1,DAG1,ST3GAL1,B3GNT9,GALNT5,SPON2,B3GNT7,GALNT14,ADAMTS17,MUC20,GCNT4,ST6GALNAC2,B3GNT3,GALNT10,ST3GAL4,MUC16,ADAMTSL5,ADAMTS7,ST6GALNAC4,C1GALT1,CHST4,MUC21,ADAMTSL4,B3GNT8,THSD4,MUC15,GALNT7,POMGNT2,SPON1,B3GALNT2,ST3GAL3,B3GNT6
126	REACTOME_O_GLYCOSYLATION_OF_TSR_DOMAIN_CONTAINING_PROTEINS	0.00299401	0.0230683	0.632773	1.89149	1	24	THSD7A,THSD1,ADAMTS1,THBS1,SPON2,ADAMTS17,ADAMTSL5,ADAMTS7,ADAMTSL4,THSD4,SPON1
127	REACTOME_NR1H2_AND_NR1H3_MEDIATED_SIGNALING	0.00291545	0.0230683	0.578624	1.89094	1	37	FASN,TBL1X,MOV10,SREBF1,ARL4C,TNRC6B,PLTP,EP300,AGO2,RXRA,NCOA1,TNRC6C,AGO1,ABCA1,ABCG1,NR1H2,NCOR2,TNRC6A,NRIP1,RXRB,FABP6
128	REACTOME_TOLL_LIKE_RECEPTOR_CASCADES	0.00116959	0.0175605	0.470795	1.88805	0	136	JUN,IRF7,SOCS1,TICAM1,UNC93B1,FOS,RELA,UBE2D2,RPS6KA2,MAP2K3,ECSIT,IRAK1,IRAK2,BIRC3,TRAF3,NFKBIA,MAPKAPK2,RIPK1,DNM2,APP,PPP2R1A,TLR2,TAB1,NOD2,TLR3,NFKB2,DUSP4,NFKB1,MAPK14,NFKBIB,TAB2,DUSP6,TNIP2,PPP2CB,ELK1,MAP3K8,TAB3,MYD88,PELI3,NKIRAS2,NOD1,ITGB2,MAP2K7,RPS6KA1,IRF3,RIPK2,MAPK3,FADD,EEA1
129	REACTOME_SIGNALING_BY_PTK6	0.00134228	0.0175605	0.54322	1.88667	0	50	CCND1,BCAR1,EREG,KHDRBS1,RASA1,AKT1,STAT3,DOCK1,SOCS3,NRG2,ARHGAP35,CDKN1B,EGFR,ARAP1,PXN,CRK,HRAS,PTK6,EGF,NR3C1,PELP1,CBL,ERBB2,KRAS,PTPN1
130	REACTOME_GLUCAGON_SIGNALING_IN_METABOLIC_REGULATION	0.00307692	0.0230683	0.658416	1.88496	1	20	PRKACA,GNB2,GNB4,GNB1,GNG4,GNAS,ADCY9,ADCY7,ADCY5,PRKAR1B,ADCY4
131	REACTOME_CD28_DEPENDENT_PI3K_AKT_SIGNALING	0.00311042	0.0230683	0.666195	1.88229	1	19	AKT1,MAP3K14,TRIB3,MAPKAP1,FYN,MAP3K8,MTOR,PDPK1,CD86,AKT2,MLST8,PIK3CA,RICTOR
132	REACTOME_GLUCAGON_LIKE_PEPTIDE_1_GLP1_REGULATES_INSULIN_SECRETION	0.00294118	0.0230683	0.607613	1.88072	1	27	PRKACA,GNB2,GNB4,GNB1,GNG4,GNAS,ITPR1,ITPR2,ITPR3,RAPGEF3,ADCY5,PRKAR1B
133	REACTOME_INTEGRATION_OF_ENERGY_METABOLISM	0.00126422	0.0175605	0.504059	1.88057	0	79	PRKACA,GNB2,PLCB3,FASN,GNB4,ACLY,GNB1,GNG4,GNAI2,MARCKS,GNA15,TKT,GNAS,GNA11,PPP2R1A,AHCYL1,ADCY9,STXBP1,STK11,ADCY7,PPP2CB,ITPR1,ACACA,ITPR2,STX1A,ITPR3,RAPGEF3,SLC2A1,ADCY5,PRKAR1B,ADCY4
134	REACTOME_REGULATION_OF_CHOLESTEROL_BIOSYNTHESIS_BY_SREBP_SREBF	0.00131062	0.0175605	0.533076	1.87933	0	55	HELZ2,FASN,TBL1X,KPNB1,SREBF2,SREBF1,CARM1,SCAP,MBTPS1,ELOVL6,CREBBP,SEC24C,LSS,MVK,RXRA,NCOA1,ACACA,MTF1,SP1,NCOA2,NCOA6,PPARA
135	REACTOME_TNF_RECEPTOR_SUPERFAMILY_TNFSF_MEMBERS_MEDIATING_NON_CANONICAL_NF_KB_PATHWAY	0.0016835	0.0179611	0.753681	1.87794	0	12	TNFSF13B,TNFRSF12A,LTBR,BIRC3,TRAF3,MAP3K14
136	REACTOME_EPHB_MEDIATED_FORWARD_SIGNALING	0.00277008	0.0230683	0.561349	1.87718	1	40	ACTG1,ACTB,EPHB4,EPHB2,WASL,SRC,RASA1,LIMK1,ITSN1,FYN,CFL1,YES1,ARPC4,HRAS,LYN,EPHB3
137	REACTOME_GRB2_SOS_PROVIDES_LINKAGE_TO_MAPK_SIGNALING_FOR_INTEGRINS	0.00335571	0.0235837	0.78208	1.87248	1	10	FN1,TLN1,GRB2,SRC,ITGB3
138	REACTOME_FCGR3A_MEDIATED_IL10_SYNTHESIS	0.00290276	0.0230683	0.592461	1.87012	1	29	PRKACA,SRC,AHCYL1,ADCY9,PRKX,ADCY7,FYN,ITPR1,YES1,ITPR2,ITPR3,LYN,ADCY5,PRKAR1B,ADCY4
139	REACTOME_GPVI_MEDIATED_ACTIVATION_CASCADE	0.00299401	0.0230683	0.618999	1.87002	1	25	RHOB,RHOG,PRKCZ,VAV2,PDPN,VAV1,FYN,RAC2,LYN,PDPK1
140	REACTOME_EPH_EPHRIN_MEDIATED_REPULSION_OF_CELLS	0.00134409	0.0175605	0.54713	1.8688	0	44	MMP9,MMP2,ACTG1,ACTB,AP2A1,AP2A2,CLTA,EPHB4,APH1A,EPHB2,EPHA2,SRC,VAV2,FYN,YES1,LYN,EFNA5,EPHA10,NCSTN,EPHB3
141	REACTOME_SEMA4D_INDUCED_CELL_MIGRATION_AND_GROWTH_CONE_COLLAPSE	0.00461538	0.0290892	0.652645	1.86843	2	20	RHOB,MYH14,MYL9,MYH9,RND1,LIMK1,RHOC,ERBB2,MYH10,ROCK1,ARHGEF11
142	REACTOME_SIGNALING_BY_CYTOSOLIC_FGFR1_FUSION_MUTANTS	0.00316456	0.0230683	0.67421	1.86558	1	17	STAT1,CUX1,GRB2,STAT5A,STAT3,GAB2,MYO18A,BCR,STAT5B
143	REACTOME_HEME_SIGNALING	0.00134409	0.0175605	0.545808	1.86429	0	44	HELZ2,NR1D1,TBL1X,HMOX1,CARM1,MEF2D,CRTC3,CREBBP,RAI1,EP300,CRTC2,RXRA,NCOA1,NCOA2,NCOA6,PPARA,BACH1,MAFK,SIRT1,NRIP1,MEF2C
144	REACTOME_FOXO_MEDIATED_TRANSCRIPTION_OF_CELL_DEATH_GENES	0.0048	0.0291804	0.699345	1.86382	2	15	BBC3,DDIT3,PINK1,CITED2,CREBBP,EP300,FOXO3,STK11
145	REACTOME_TYPE_I_HEMIDESMOSOME_ASSEMBLY	0.00169779	0.0179944	0.761438	1.8634	0	11	LAMC2,LAMA3,LAMB3,COL17A1,ITGB4,PLEC,CD151
146	REACTOME_INTERLEUKIN_7_SIGNALING	0.00308166	0.0230683	0.637658	1.86025	1	22	SOCS1,SMARCA4,IRS2,STAT5A,STAT3,CISH,SOCS2,JAK1,IRS1,H3C13,STAT5B,H3C6,IL7R
147	REACTOME_TAK1_ACTIVATES_NFKB_BY_PHOSPHORYLATION_AND_ACTIVATION_OF_IKKS_COMPLEX	0.00291971	0.0230683	0.5819	1.85978	1	31	RELA,IRAK1,IRAK2,NFKBIA,APP,TAB1,NOD2,NFKB2,NFKB1,NFKBIB,TAB2,TAB3,NKIRAS2,NOD1,RIPK2
148	REACTOME_SYNDECAN_INTERACTIONS	0.00308166	0.0230683	0.636942	1.85816	1	22	FN1,ACTN1,THBS1,ITGB5,ITGB4,CASK,SDC1,TGFB1,SDC3,ITGB3,TNC,ITGAV,SDC4
149	REACTOME_G_ALPHA_Z_SIGNALLING_EVENTS	0.00292398	0.0230683	0.583611	1.85644	1	30	GNB2,PRKCD,GNB4,GNB1,GNG4,GNAI2,GNAS,RGS19,RGS20,ADCY9,ADCY7,ADCY5,ADCY4,RGS16,GNAZ,RGS17
150	REACTOME_TNFR1_INDUCED_PROAPOPTOTIC_SIGNALING	0.003367	0.0235837	0.744646	1.85543	1	12	TNFAIP3,TNFRSF1A,RIPK1,TRADD,OTUD7B,CYLD,USP2,FADD
151	REACTOME_CA2_PATHWAY	0.00134589	0.0175605	0.537931	1.85396	0	47	GNB2,PLCB3,GNB4,NFATC1,GNB1,GNG4,FZD5,MOV10,TNRC6B,TCF7L1,TCF7L2,AGO2,ITPR1,ITPR2,PPP3R1,ITPR3,TNRC6C,AGO1,PPP3CA,MYC,KRAS
152	REACTOME_GAB1_SIGNALOSOME	0.00474683	0.0291804	0.669972	1.85386	2	17	CSK,GRB2,EREG,SRC,EGFR,PXN,EPGN,EGF,PIK3CA,AREG,TGFA,BTC,HBEGF
153	REACTOME_DISEASES_OF_SIGNAL_TRANSDUCTION_BY_GROWTH_FACTOR_RECEPTORS_AND_SECOND_MESSENGERS	0.00104058	0.0175605	0.424991	1.85242	0	380	FN1,STAT1,ZC3HAV1,RNF213,PIM1,JUNB,HDAC9,ACTG1,CEBPB,DUSP8,PDGFB,GTF2F1,ACTB,MYH9,LMNA,QKI,TLN1,CUX1,MAP2K2,ARAF,RRBP1,CSK,SPRED1,SPRED3,GRB2,HES1,IRS2,HDAC11,EREG,APH1A,AKT1S1,BRAP,PPFIBP1,NR4A1,FZD5,PSMA6,SHC1,STAT5A,JAK2,POLR2A,PIK3AP1,TBL1X,RHOG,SRC,JAG1,HDAC5,AKT1,STAT3,PSMD3,MECP2,GAB2,DUSP10,PSMB9,TCF7L2,MAP3K11,AXIN1,BCL2A1,PPP2R1A,NRG2,TPM4,CREBBP,PTPN12,SYVN1,PSMB10,CDKN1A,STRN,MYO18A,T…
154	REACTOME_RESPONSE_OF_EIF2AK1_HRI_TO_HEME_DEFICIENCY	0.0048	0.0291804	0.694906	1.85198	2	15	ATF3,CEBPB,GRB10,PPP1R15A,DDIT3,TRIB3,CHAC1,ATF5
155	REACTOME_REGULATION_BY_C_FLIP	0.00335571	0.0235837	0.773323	1.85152	1	10	TNFRSF10B,RIPK1,TNFRSF10A,CFLAR,TNFSF10,TRADD,FADD
156	REACTOME_ANTIGEN_PRESENTATION_FOLDING_ASSEMBLY_AND_PEPTIDE_LOADING_OF_CLASS_I_MHC	0.00299401	0.0230683	0.619303	1.85123	1	24	TAP1,HLA-A,TAP2,TAPBP,HLA-B,HLA-E,HLA-F,HLA-C,SEC24C
157	REACTOME_RHOJ_GTPASE_CYCLE	0.00133511	0.0175605	0.530912	1.84838	0	51	CDC42EP1,JUP,ARHGAP1,ARHGAP26,PAK4,FMNL3,CDC42BPB,WASL,WIPF2,TRIO,SCRIB,CDC42BPA,ARHGAP35,CAV1,WWP2,VANGL1,FNBP1,PAK2,LAMTOR1,SNAP23,ARHGAP21,ARHGAP32,TFRC,ARHGEF7,OPHN1,STEAP3
158	REACTOME_SIGNALING_BY_TGF_BETA_RECEPTOR_COMPLEX	0.00125945	0.0175605	0.497957	1.84578	0	74	JUNB,SERPINE1,CDKN2B,ARHGEF18,PPP1R15A,PRKCZ,SMURF1,PMEPA1,FURIN,CCNK,BAMBI,UBE2M,PARD3,CGN,TGFB1,SMAD3,F11R,CDK9,NEDD4L,SKI,TGIF2,TGIF1,SP1,TGFBR2,PPP1CA,CBL,WWTR1,MAPK3,MYC,RNF111,SMURF2,NCOR2,USP9X,PARD6A,PPM1A,MAPK1,TRIM33,STUB1
159	REACTOME_G_PROTEIN_ACTIVATION	0.003367	0.0235837	0.740546	1.84521	1	12	GNB2,GNB4,GNB1,GNG4,GNA15,GNA11
160	REACTOME_ADP_SIGNALLING_THROUGH_P2Y_PURINOCEPTOR_1	0.0048	0.0291804	0.692206	1.84479	2	15	GNB2,GNB4,GNB1,GNG4,GNA15,SRC,GNA11,MAPK14
161	REACTOME_CONSTITUTIVE_SIGNALING_BY_ABERRANT_PI3K_IN_CANCER	0.00133511	0.0175605	0.528943	1.84152	0	51	PDGFB,GRB2,IRS2,EREG,PIK3AP1,RHOG,SRC,GAB2,NRG2,STRN,VAV1,FGF1,FYN,EGFR,RAC2,MET,EPGN,IRS1,EGF,CD86,ESR1,ERBB2
162	REACTOME_DISEASES_ASSOCIATED_WITH_GLYCOSAMINOGLYCAN_METABOLISM	0.00292398	0.0230683	0.578663	1.8407	1	30	AGRN,B4GALT7,EXT1,HSPG2,CHST14,GPC6,SDC1,CSPG4,SDC3,CHSY1,CHST6,SDC4,ST3GAL3,B4GALT1,GPC4,GPC1,GPC2,VCAN
163	REACTOME_STAT5_ACTIVATION_DOWNSTREAM_OF_FLT3_ITD_MUTANTS	0.00335571	0.0235837	0.817251	1.84041	1	8	PIM1,GRB2,STAT5A,GAB2,CDKN1A,STAT5B,BCL2L1
164	REACTOME_ELASTIC_FIBRE_FORMATION	0.00285714	0.0230683	0.564177	1.84	1	35	FN1,ITGA5,FBLN1,ITGB5,FURIN,LTBP2,LOXL2,BMP2,LOXL4,LTBP3,TGFB1,TGFB2,LTBP1,EFEMP2,ITGB6,FBLN2,ITGB3,MFAP2,ITGAV
165	REACTOME_FOXO_MEDIATED_TRANSCRIPTION_OF_CELL_CYCLE_GENES	0.0064	0.0326801	0.6899	1.83864	3	15	GADD45A,KLF4,CDKN1A,SMAD3,FOXO3,CAV1,CCNG2,CDKN1B
166	REACTOME_PTK6_REGULATES_RHO_GTPASES_RAS_GTPASE_AND_MAP_KINASES	0.00330033	0.0235837	0.719956	1.83859	1	13	BCAR1,RASA1,DOCK1,ARHGAP35,PXN,CRK,HRAS,PTK6,KRAS,ELMO2
167	REACTOME_REGULATION_OF_INSULIN_SECRETION	0.00131752	0.0175605	0.523365	1.83789	0	53	PRKACA,GNB2,PLCB3,GNB4,GNB1,GNG4,GNAI2,MARCKS,GNA15,GNAS,GNA11,AHCYL1,STXBP1,ITPR1,ITPR2,STX1A,ITPR3,RAPGEF3,SLC2A1,ADCY5,PRKAR1B
168	REACTOME_P38MAPK_EVENTS	0.00330033	0.0235837	0.719629	1.83776	1	13	SRC,MAPKAPK2,RALB,MAPK14,MAPK13,HRAS,KRAS
169	REACTOME_INTERLEUKIN_6_FAMILY_SIGNALING	0.00615385	0.0321827	0.641647	1.83695	3	20	STAT1,LIFR,CRLF1,JAK2,STAT3,SOCS3,LIF,CTF1,JAK1,CBL,OSMR
170	REACTOME_CLATHRIN_MEDIATED_ENDOCYTOSIS	0.00117509	0.0175605	0.461436	1.83651	0	129	TOR1B,ACTG1,DVL2,ACTB,UBQLN2,AP2A1,AP2A2,IGF2R,LDLR,CLTA,FCHO1,GRB2,SH3KBP1,EREG,SH3GL1,COPS7A,TRIP10,WASL,SCARB2,EPS15L1,HIP1R,DNM2,EPN1,LDLRAP1,RAB5C,PIP5K1C,CTTN,ARF6,GRK2,ITSN1,GAK,GAPVD1,EGFR,SNX9,SYNJ2,EPGN,BIN1,ARPC4,ADRB2,FNBP1,EGF,UBQLN1,STON2,CBL,SNX18,AAK1,ARRB2,SYNJ1,ARRB1,EPN2,PICALM,IL7R,ARFGAP1,DAB2,AP2M1,SYT11,STON1,AREG,PACSIN2,TGFA,TFRC,GRK3,CLTC,DNM3,BTC,AP2S1,ITSN2,CLTB
171	REACTOME_SIGNALING_BY_MODERATE_KINASE_ACTIVITY_BRAF_MUTANTS	0.00291545	0.0230683	0.561541	1.83511	1	37	FN1,ACTG1,ACTB,TLN1,MAP2K2,ARAF,CSK,BRAP,JAK2,SRC,MAP3K11,HRAS,MAPK3,ARRB2,KRAS,ITGB3,ARRB1,MAPK1,VCL,MAP2K1
172	REACTOME_ACTIVATION_OF_PUMA_AND_TRANSLOCATION_TO_MITOCHONDRIA	0.0034188	0.0237401	0.791494	1.83052	1	9	BBC3,TP53,TP73
173	REACTOME_SIGNALING_BY_FLT3_ITD_AND_TKD_MUTANTS	0.0048	0.0291804	0.701345	1.82799	2	14	PIM1,GRB2,STAT5A,GAB2,CDKN1A,HRAS,STAT5B,BCL2L1,KRAS,PIK3CA
174	REACTOME_CLASS_A_1_RHODOPSIN_LIKE_RECEPTORS	0.00119904	0.0175605	0.467846	1.82166	0	109	CXCL10,CXCL9,CXCL11,CCL5,CXCL16,ECE1,CX3CL1,CCL22,ADRB1,PLPPR3,C5AR2,CCL20,APP,S1PR2,EDN1,CXCL3,CCL28,CXCL13,NPFFR2,ACKR2,PTAFR,DRD4,ADRB2,CXCL5,PTGER4,EDNRA,ANXA1,ACKR4,C3,HEBP1,F2RL1,PLPPR2,HCAR3,CXCL2,GPER1,NMB,LPAR2,RRH,OXTR,GPR37L1,GPR132
175	REACTOME_ASSEMBLY_OF_ACTIVE_LPL_AND_LIPC_LIPASE_COMPLEXES	0.00335571	0.0235837	0.808641	1.82102	1	8	LMF2,PCSK6,LMF1,FURIN,MBTPS1,ANGPTL4
176	REACTOME_SIGNALING_BY_PDGFR_IN_DISEASE	0.00783699	0.0370246	0.649669	1.81856	4	18	STAT1,GRB2,STAT3,STRN,HRAS,KANK1,KDR,ETV6,KRAS,PIK3CA
177	REACTOME_DISEASES_ASSOCIATED_WITH_O_GLYCOSYLATION_OF_PROTEINS	0.00133511	0.0175605	0.522185	1.81799	0	51	THSD7A,THSD1,ADAMTS1,NOTCH2,THBS1,DAG1,SPON2,ADAMTS17,MUC20,NOTCH3,MUC16,ADAMTSL5,ADAMTS7,C1GALT1,MUC21,ADAMTSL4,THSD4,MUC15,NOTCH1
178	REACTOME_TRANSCRIPTIONAL_REGULATION_OF_WHITE_ADIPOCYTE_DIFFERENTIATION	0.00125945	0.0175605	0.490245	1.81719	0	74	HELZ2,EGR2,CEBPB,RELA,KLF4,TBL1X,CCND3,SREBF2,SREBF1,MED15,MED16,CARM1,MED12,CREBBP,ZNF467,ANGPTL4,TGFB1,NCOA3,NFKB1,EP300,MED26,RXRA,MED24,NCOA1,KLF5,NCOA2,NCOA6,PPARA,MED13L,MED25,NCOR2,MED13
179	REACTOME_G_ALPHA_12_13_SIGNALLING_EVENTS	0.00261097	0.0230683	0.503866	1.81361	1	62	GNB2,RHOB,ARHGEF18,GNB4,GNB1,GNG4,TRIO,ARHGEF40,ARHGEF37,ARHGEF10L,VAV2,GNA12,AKAP13,VAV1,ITSN1,FGD2,ABR,RHOC,PLEKHG2,ARHGEF1,ARHGEF16,FGD1,ROCK1,ARHGEF11,ARHGEF5
180	REACTOME_TNFR1_INDUCED_NFKAPPAB_SIGNALING_PATHWAY	0.00294985	0.0230683	0.583375	1.81312	1	28	TNFAIP3,RBCK1,TNFRSF1A,BIRC3,RIPK1,TAB1,TRADD,OTUD7B,CYLD,TAB2,TAB3,USP2,IKBKG,XIAP,TRAF1
181	REACTOME_FCERI_MEDIATED_CA_2_MOBILIZATION	0.00308166	0.0230683	0.621105	1.81196	1	22	GRB2,NFATC1,SHC1,VAV2,AHCYL1,VAV1,ITPR1,ITPR2,PPP3R1,ITPR3,LYN,NFATC2,PPP3CA
182	REACTOME_DEFECTIVE_INTRINSIC_PATHWAY_FOR_APOPTOSIS	0.00299401	0.0230683	0.605504	1.80998	1	24	JUN,TP53,CAPN1,LMNA,APP,SOD2,CAPNS1,FOXO3,CAPN2,CDKN2A
183	REACTOME_CD209_DC_SIGN_SIGNALING	0.00791139	0.0372668	0.653554	1.80843	4	17	PRKACA,RELA,RELB,CREBBP,NFKB1,EP300,FYN,HRAS,PAK2,LYN,KRAS
184	REACTOME_ASSEMBLY_OF_COLLAGEN_FIBRILS_AND_OTHER_MULTIMERIC_STRUCTURES	0.00136426	0.0175605	0.527605	1.80744	0	46	MMP9,COL4A2,LAMC2,LAMA3,MMP13,LAMB3,COL17A1,ITGB4,LOXL2,LOXL4,BMP1,PXDN,PLEC,COL9A2,COL18A1,CD151,COL27A1,TLL2,COL8A1,COL4A1,CTSV
185	REACTOME_SENSORY_PROCESSING_OF_SOUND	0.00130208	0.0175605	0.507091	1.80719	0	57	CAPZB,ACTG1,MYO1C,ACTB,MYH9,EPB41L1,GSN,TWF2,KCNMA1,USH1G,CASK,EPS8L2,DNAJC5,CTBP2,SPTBN1,STX1A,TRIOBP,RAB3A,SPTAN1,TMIE,TMC1,TPRN,SYP
186	REACTOME_DEX_H_BOX_HELICASES_ACTIVATE_TYPE_I_IFN_AND_INFLAMMATORY_CYTOKINES_PRODUCTION	0.00511945	0.0295055	0.828589	1.80508	2	7	IRF7,RELA,DHX36,NFKB2,NFKB1,MYD88
187	REACTOME_NF_KB_ACTIVATION_THROUGH_FADD_RIP_1_PATHWAY_MEDIATED_BY_CASPASE_8_AND_10	0.0049505	0.0295055	0.706192	1.80344	2	13	IFIH1,DDX58,TRIM25,RIPK1,CASP10,MAVS,FADD,IKBKG,RNF135
188	REACTOME_G_ALPHA_S_SIGNALLING_EVENTS	0.00130719	0.0175605	0.505119	1.80342	0	59	GNB2,ADRB1,GNB4,GNB1,GNG4,GNAI2,SRC,ADM,GNAS,ADM2,GRK2,ADCY9,GRK6,ADCY7,ADRB2,PTGER4,PDE7A,SCTR,ADCY5,ARRB2,ADCY4,ARRB1,GNAZ
189	REACTOME_CELLULAR_SENESCENCE	0.00112867	0.0175605	0.439522	1.80193	0	163	JUN,TP53,H1-0,CEBPB,FOS,RELA,CBX4,CDKN2B,RPS6KA2,ETS1,MAP2K3,HMGA1,H2BC21,NBN,CBX6,PHC2,MOV10,H1-4,MAPKAPK2,IL1A,UBE2S,CDK6,STAT3,TNRC6B,HIRA,FZR1,UBN1,EHMT1,CDKN1A,ERF,TERF1,EHMT2,RBBP7,NFKB1,MAPK14,CDKN1B,H2BC7,MDM2,HMGA2,RING1,H4C4,MAP4K4,H2BC6,H3C13,TERF2IP,SP1,MAP2K7,TNRC6C,CDKN2A,RPS6KA1,AGO1,MAPK3,CBX8,KAT5
190	REACTOME_FCERI_MEDIATED_MAPK_ACTIVATION	0.00296296	0.0230683	0.58678	1.801	1	26	JUN,FOS,GRB2,SHC1,VAV2,VAV1,HRAS,PAK2,LYN,MAP2K7,MAPK3,KRAS
191	REACTOME_REGULATION_OF_KIT_SIGNALING	0.00940439	0.0413947	0.661805	1.80044	5	16	SOCS1,GRB2,SRC,SH2B2,SH2B3,FYN,YES1,LYN,CBL
192	REACTOME_CELL_EXTRACELLULAR_MATRIX_INTERACTIONS	0.00940439	0.0413947	0.661028	1.79833	5	16	ACTN1,ACTG1,FLNA,ACTB,VASP,PARVA,FBLIM1,PXN,FERMT2,TESK1
193	REACTOME_NUCLEAR_RECEPTOR_TRANSCRIPTION_PATHWAY	0.00269906	0.0230683	0.527774	1.79727	1	43	NR1D1,RARA,PPARD,ESRRA,NR4A1,NR2E3,NR2F6,VDR,RXRA,NR3C1,ESR1,NR1D2,NR1H2,PPARA,THRA,NCOR2,RORC,NR4A3,RARG,RXRB
194	REACTOME_ADORA2B_MEDIATED_ANTI_INFLAMMATORY_CYTOKINES_PRODUCTION	0.00133511	0.0175605	0.515426	1.79446	0	51	PRKACA,GNB2,ADRB1,GNB4,GNB1,GNG4,GNAI2,ADM,GNAS,ADM2,ADCY9,PRKX,ADCY7,ADRB2,PTGER4,SCTR,ADCY5,PRKAR1B,ADCY4,GNAZ
195	REACTOME_DISASSEMBLY_OF_THE_DESTRUCTION_COMPLEX_AND_RECRUITMENT_OF_AXIN_TO_THE_MEMBRANE	0.00296296	0.0230683	0.584226	1.79316	1	26	DVL2,FZD5,FZD1,CSNK1G2,AXIN1,PPP2R1A,CAV1,PPP2CB,DVL3,PPP2R5B,DVL1,PPP2R5A,LRP5,CSNK1A1,AMER1,FRAT2,PPP2R5D,CTNNB1
196	REACTOME_EGR2_AND_SOX10_MEDIATED_INITIATION_OF_SCHWANN_CELL_MYELINATION	0.0030303	0.0230683	0.609509	1.79289	1	23	EGR2,SMARCA4,DAG1,SREBF2,MBP,LAMC1,YAP1,WWTR1,SCD5,LAMB1,PRX,MPZ
197	REACTOME_THROMBOXANE_SIGNALLING_THROUGH_TP_RECEPTOR	0.0049505	0.0295055	0.701523	1.79152	2	13	GNB2,GNB4,GNB1,GNG4,GNA15,GNA11
198	REACTOME_THROMBIN_SIGNALLING_THROUGH_PROTEINASE_ACTIVATED_RECEPTORS_PARS	0.00622084	0.0322021	0.633924	1.79111	3	19	GNB2,GNB4,GNB1,GNG4,GNA15,SRC,GNA11,GNA12,MAPK3,ARRB2,ARRB1,MAPK1
199	REACTOME_RHO_GTPASES_ACTIVATE_WASPS_AND_WAVES	0.00435414	0.0279571	0.555132	1.78848	2	33	ACTG1,ACTB,ABL1,GRB2,WASL,WIPF2,WASF2,BAIAP2,NCKAP1,ARPC4,WASF1,WASF3,MAPK3,NCKIPSD
200	REACTOME_SIGNALING_BY_ALK_IN_CANCER	0.00262467	0.0230683	0.507984	1.78794	1	54	FN1,RNF213,JUNB,CEBPB,MYH9,RRBP1,GRB2,PPFIBP1,SHC1,STAT5A,STAT3,MECP2,BCL2A1,TPM4,STRN,SQSTM1,KLC1,IRS1,PPM1B,EIF2AK3,MAPK3
201	REACTOME_HS_GAG_DEGRADATION	0.00615385	0.0321827	0.624402	1.78758	3	20	AGRN,HSPG2,NAGLU,GPC6,SDC1,SDC3,GLB1L,HPSE,GUSB,SDC4,IDUA,HGSNAT,GPC4,GPC1,GPC2
202	REACTOME_INACTIVATION_OF_CSF3_G_CSF_SIGNALING	0.00308166	0.0230683	0.612592	1.78713	1	22	STAT1,SOCS1,UBE2D2,STAT5A,JAK2,STAT3,SOCS3,JAK1,STAT5B,LYN
203	REACTOME_SIGNAL_AMPLIFICATION	0.00615385	0.0321827	0.623925	1.78621	3	20	GNB2,GNB4,GNB1,GNG4,GNAI2,GNA15,SRC,GNA11,MAPK14
204	REACTOME_DEFECTIVE_B4GALT7_CAUSES_EDS_PROGEROID_TYPE	0.0064	0.0326801	0.669901	1.78534	3	15	AGRN,B4GALT7,HSPG2,GPC6,SDC1,CSPG4,SDC3,SDC4,GPC4,GPC1,GPC2,VCAN
205	REACTOME_RHOG_GTPASE_CYCLE	0.00254777	0.0230683	0.483635	1.78329	1	70	CDC42EP1,EMD,ARHGAP1,ARHGDIA,PAK4,EPHA2,RHOG,TRIO,PLEKHG3,VAV2,VAPB,DOCK1,MAP3K11,ARHGAP35,VAV1,ITSN1,CAV1,ESYT1,ANKLE2,VANGL1,PAK2,PGRMC2,LAMTOR1,ARHGEF16,SHMT2,ARHGAP21,ARHGEF5,ELMO2,ERBIN,ARHGAP32,TFRC,OPHN1,DOCK5,DSG2,LETM1
206	REACTOME_VASOPRESSIN_REGULATES_RENAL_WATER_HOMEOSTASIS_VIA_AQUAPORINS	0.00294985	0.0230683	0.573632	1.78284	1	28	PRKACA,GNB2,GNB4,GNB1,GNG4,GNAS,ADCY9,ADCY7,MYO5B,ADCY5,PRKAR1B,ADCY4
207	REACTOME_ADP_SIGNALLING_THROUGH_P2Y_PURINOCEPTOR_12	0.00503356	0.0295055	0.744524	1.78256	2	10	GNB2,GNB4,GNB1,GNG4,GNAI2
208	REACTOME_REGULATION_OF_MECP2_EXPRESSION_AND_ACTIVITY	0.00294985	0.0230683	0.57348	1.78236	1	28	PRKACA,HIPK2,TBL1X,MOV10,TNRC6B,MECP2,HTT,AGO2,TNRC6C,AGO1,NCOR2,TNRC6A
209	REACTOME_NICOTINAMIDE_SALVAGING	0.0109718	0.0457916	0.655068	1.78211	6	16	PTGS2,PARP14,PARP10,PARP9,NAPRT,PARP8,NAMPT,NAXE
210	REACTOME_REGULATION_OF_TP53_ACTIVITY_THROUGH_ACETYLATION	0.00292398	0.0230683	0.558884	1.77779	1	30	PML,TP53,GATAD2A,GATAD2B,BRD1,MTA2,AKT1,KAT6A,BRPF3,RBBP7,EP300,PIP4K2B,PIP4K2C,PIP4K2A,AKT2,CHD3
211	REACTOME_P130CAS_LINKAGE_TO_MAPK_SIGNALING_FOR_INTEGRINS	0.00503356	0.0295055	0.742403	1.77749	2	10	FN1,TLN1,BCAR1,SRC,CRK,ITGB3
212	REACTOME_ERK_MAPK_TARGETS	0.00308166	0.0230683	0.608661	1.77566	1	22	RPS6KA2,PPP2R1A,DUSP4,MAPK14,DUSP6,PPP2CB,ELK1,RPS6KA1,MAPK3,DUSP3,RPS6KA3,MAPK1,MEF2C,DUSP7,PPP2R5D,MEF2A
213	REACTOME_RHOA_GTPASE_CYCLE	0.00116959	0.0175605	0.442602	1.77499	0	136	PKN1,JUP,ARHGAP1,ARHGDIA,ARHGEF18,ARHGAP26,STK10,FMNL3,TRIO,CAVIN1,PLEKHG6,PLEKHG3,TJP2,ARHGEF40,ARHGEF10L,ATP6AP1,VAV2,VAPB,ARHGAP8,RTKN,RHPN2,ARHGAP29,AKAP13,TAGAP,SRGAP1,ARHGAP35,DLC1,DIAPH1,ARHGAP22,VAV1,ARHGAP44,CAV1,ARHGAP23,ABR,BCR,ARAP1,MYO9B,VANGL1,FARP1,ARHGEF1,PGRMC2,GMIP,PCDH7,ARAP3,ARHGAP20,SNAP23,PKN3,ROCK1,ARHGEF11,ACBD5,ARHGAP21,ARHGEF5,ERBIN,ARHGAP32,TFRC,ARAP2,ARHGEF7,OPHN1
214	REACTOME_INTERLEUKIN_21_SIGNALING	0.00511945	0.0295055	0.813497	1.7722	2	7	STAT1,STAT5A,STAT3,JAK1,STAT5B
215	REACTOME_DEATH_RECEPTOR_SIGNALLING	0.00116686	0.0175605	0.443103	1.77041	0	132	TNFAIP3,RBCK1,RELA,ARHGDIA,ARHGEF18,TNFRSF10B,TNFRSF1A,APH1A,IRAK1,BIRC3,TRIO,NFKBIA,ARHGEF40,ARHGEF37,RIPK1,ARHGEF10L,TNFRSF10A,VAV2,CFLAR,RTN4R,AKAP13,TNFSF10,TAB1,TRADD,VAV1,OTUD7B,ITSN1,NFKB1,CYLD,FGD2,TAB2,SQSTM1,ABR,CASP10,TAB3,MYD88,PLEKHG2,USP2,MADD,ARHGEF1,NCSTN,NGFR,RIPK2,RTN4,FADD,ARHGEF16,BEX3,FGD1,ARHGEF11,ARHGEF5,IKBKG,XIAP,TRAF1
216	REACTOME_REGULATION_OF_LIPID_METABOLISM_BY_PPARALPHA	0.00119904	0.0175605	0.455249	1.76949	0	106	HELZ2,NR1D1,ESRRA,ACSL1,G0S2,TBL1X,TNFRSF21,SREBF2,SREBF1,MED15,MED16,CARM1,MED12,SLC27A1,CYP4A11,CREBBP,TRIB3,ANGPTL4,NCOA3,EP300,MED26,RXRA,ME1,MED24,NCOA1,CYP1A1,MTF1,SP1,ABCA1,NCOA2,NCOA6,NR1H2,PPARA,CPT1A,MED13L,MED25,NCOR2,MED13,SIN3B
217	REACTOME_DAP12_INTERACTIONS	0.00598802	0.0317326	0.59181	1.76904	3	24	GRB2,SHC1,HLA-B,VAV2,HLA-E,TREM1,HLA-C,FYN,HRAS,KRAS,PIK3CA
218	REACTOME_SIGNALING_BY_EGFR	0.00271003	0.0230683	0.51234	1.76899	1	49	CSK,GRB2,SH3KBP1,EREG,SH3GL1,SHC1,SRC,EPS15L1,PTPRK,EPN1,PTPN12,SPRY2,EGFR,PXN,EPGN,HRAS,EGF,CBL,SPRY1,KRAS,PIK3CA,AREG,TGFA,ARHGEF7
219	REACTOME_SIGNALING_BY_NTRK3_TRKC	0.0048	0.0291804	0.678343	1.76804	2	14	GRB2,SHC1,SRC,NELFB,HRAS,IRS1,BAX,KRAS,PIK3CA
220	REACTOME_STAT3_NUCLEAR_EVENTS_DOWNSTREAM_OF_ALK_SIGNALING	0.00512821	0.0295055	0.761657	1.76151	2	9	CD274,PRDM1,STAT3,EP300
221	REACTOME_MATURATION_OF_SARS_COV_1_NUCLEOPROTEIN	0.00339559	0.0236809	0.718515	1.75836	1	11	PARP14,PARP10,PARP9,PARP8
222	REACTOME_RUNX3_REGULATES_CDKN1A_TRANSCRIPTION	0.00853242	0.0390063	0.806296	1.75651	4	7	TP53,ZFHX3,CDKN1A,TGFB1,SMAD3
223	REACTOME_INTERLEUKIN_2_SIGNALING	0.00671141	0.033243	0.779819	1.75611	3	8	PTK2B,SHC1,STAT5A,JAK1,STAT5B
224	REACTOME_METABOLISM_OF_ANGIOTENSINOGEN_TO_ANGIOTENSINS	0.00503356	0.0295055	0.733344	1.7558	2	10	CTSD,CTSZ,MME
225	REACTOME_PRE_NOTCH_EXPRESSION_AND_PROCESSING	0.00126103	0.0175605	0.468663	1.75243	0	81	JUN,TP53,CCND1,NOTCH2,H2BC21,MOV10,FURIN,TNRC6B,RAB6A,CREBBP,ELF3,EP300,AGO2,H2BC7,NOTCH3,ST3GAL4,SIRT6,H4C4,H2BC6,RFNG,H3C13,ATP2A2,TNRC6C,KAT2B,RUNX1,AGO1,MAML2,NOTCH1,H3C6,POFUT1,TNRC6A,ST3GAL3
226	REACTOME_DISSOLUTION_OF_FIBRIN_CLOT	0.00673401	0.033243	0.702585	1.75062	3	12	PLAU,SERPINE1,PLAUR,SERPINE2,SERPINB2
227	REACTOME_MAP2K_AND_MAPK_ACTIVATION	0.00723589	0.034691	0.540096	1.74934	4	34	FN1,ACTG1,ACTB,TLN1,MAP2K2,ARAF,CSK,SRC,HRAS,MAPK3,ARRB2,KRAS,ITGB3,ARRB1,MAPK1,VCL,MAP2K1
228	REACTOME_SIGNALING_BY_FGFR1_IN_DISEASE	0.00435414	0.0279571	0.553978	1.74865	2	29	STAT1,CUX1,GRB2,STAT5A,STAT3,GAB2,MYO18A,FGF1,BCR,HRAS,STAT5B
229	REACTOME_SIGNALING_BY_ERYTHROPOIETIN	0.0046225	0.0290892	0.59923	1.74814	2	22	GRB2,IRS2,SHC1,STAT5A,JAK2,RAPGEF1,VAV1,HRAS,STAT5B,LYN,KRAS,PIK3CA
230	REACTOME_SIGNALING_BY_BRAF_AND_RAF1_FUSIONS	0.00260417	0.0230683	0.490255	1.74719	1	57	FN1,ZC3HAV1,ACTG1,ACTB,LMNA,QKI,TLN1,MAP2K2,ARAF,CSK,JAK2,SRC,FAM131B,SND1,HRAS,MAPK3,MPRIP,ARRB2,KRAS,ITGB3,ARRB1,KDM7A,MAPK1,VCL,MAP2K1
231	REACTOME_INTERLEUKIN_1_PROCESSING	0.00671141	0.033243	0.775769	1.74699	3	8	RELA,IL1A,NFKB2,NFKB1,IL1B,CASP1,IL18,GSDMD
232	REACTOME_DCC_MEDIATED_ATTRACTIVE_SIGNALING	0.00660066	0.0332302	0.683776	1.7462	3	13	NTN1,WASL,SRC,TRIO,DOCK1,FYN,ABLIM3
233	REACTOME_RHOV_GTPASE_CYCLE	0.00437318	0.0279571	0.533933	1.74489	2	37	NCK2,PAK4,EPHA2,WASL,RHOV,MAP3K11,PARD6B,ZNF512B,TPM4,SPTBN1,SH3RF1,VANGL1,PAK2,PAK6,PEAK1,SPTAN1,USP9X,PARD6A,ARHGEF7,CLTC
234	REACTOME_MAPK_TARGETS_NUCLEAR_EVENTS_MEDIATED_BY_MAP_KINASES	0.00583942	0.0315085	0.545616	1.74382	3	31	JUN,FOS,RPS6KA2,MAPKAPK2,PPP2R1A,DUSP4,MAPK14,DUSP6,PPP2CB,ELK1,RPS6KA1,MAPK3,DUSP3,RPS6KA3,MAPK1,MEF2C,DUSP7,MAPK9,PPP2R5D,MEF2A
235	REACTOME_POTASSIUM_CHANNELS	0.00552486	0.0309047	0.519249	1.74264	3	41	GNB2,KCNQ1,KCNN4,KCNG1,GNB4,GNB1,GNG4,KCNMA1
236	REACTOME_INTERLEUKIN_17_SIGNALING	0.00258732	0.0230683	0.476338	1.74117	1	68	JUN,FOS,RPS6KA2,MAP2K3,IL17C,IRAK1,IRAK2,IL17RA,MAPKAPK2,PPP2R1A,TAB1,NOD2,DUSP4,NFKB1,MAPK14,TAB2,DUSP6,TNIP2,PPP2CB,ELK1,MAP3K8,TAB3,NOD1,MAP2K7,RPS6KA1,RIPK2,MAPK3,DUSP3,RPS6KA3,MAPK1,IKBKG,MEF2C,MAP2K1,DUSP7,MAPK9
237	REACTOME_SIGNALING_BY_ALK	0.00598802	0.0317326	0.582369	1.74082	3	24	CD274,PRDM1,SHC1,SRC,MDK,STAT3,EP300,IRS1,MYC
238	REACTOME_FGFR1_MUTANT_RECEPTOR_ACTIVATION	0.0046225	0.0290892	0.596595	1.74046	2	22	STAT1,CUX1,GRB2,STAT5A,STAT3,GAB2,MYO18A,FGF1,BCR,STAT5B
239	REACTOME_MOLECULES_ASSOCIATED_WITH_ELASTIC_FIBRES	0.00435414	0.0279571	0.551118	1.73962	2	29	FN1,FBLN1,ITGB5,LTBP2,BMP2,LTBP3,TGFB1,TGFB2,LTBP1,EFEMP2,ITGB6,FBLN2,ITGB3,MFAP2,ITGAV
240	REACTOME_ADAPTIVE_IMMUNE_SYSTEM	0.00100908	0.0175605	0.390095	1.7388	0	603	HERC6,TAP1,CD274,DTX3L,CARD11,HERC5,CTSD,RNF213,CAPZB,PRKACA,SOCS1,FBXW4,ICAM1,XDH,RNF114,CD81,RBCK1,PPL,HLA-A,RELA,UBE2J2,TAP2,TRAF7,NECTIN2,AP1M1,CTSA,UBE2L6,STIM1,AP2A1,AP2A2,SIPA1,NFKBIE,TRIM69,KEAP1,UBE2D2,RNF19B,FBXL18,ORAI1,CLTA,CSK,TRIM21,CDH1,GRB2,TAPBP,RAP1GAP,PVR,SH3KBP1,AP1B1,DYNC1H1,NFATC1,RNF126,TUBB2A,BTN3A1,ACTR1B,NCF1,FBXO6,COL17A1,PSMA6,RASGRP3,UBA1,PIK3AP1,SRC,PTPRJ,NFKBIA,ITGB…
241	REACTOME_INTERLEUKIN_9_SIGNALING	0.00543478	0.0307208	0.85083	1.73765	2	6	STAT1,STAT5A,STAT3,JAK1,STAT5B
242	REACTOME_GLUCAGON_TYPE_LIGAND_RECEPTORS	0.00509338	0.0295055	0.709639	1.73663	2	11	GNB2,GNB4,GNB1,GNG4,GNAS,SCTR
243	REACTOME_CTLA4_INHIBITORY_SIGNALING	0.00933126	0.0413947	0.614443	1.73607	5	19	SRC,AKT1,PPP2R1A,FYN,PPP2CB,YES1,PPP2R5B,LYN,PPP2R5A,CD86,AKT2,PPP2R5D,AKT3,PPP2R5E
244	REACTOME_SHC1_EVENTS_IN_EGFR_SIGNALING	0.0112	0.0464131	0.665888	1.73558	6	14	GRB2,EREG,SHC1,EGFR,EPGN,HRAS,EGF,KRAS,AREG,TGFA,BTC,HBEGF,SOS1
245	REACTOME_ROLE_OF_LAT2_NTAL_LAB_ON_CALCIUM_MOBILIZATION	0.00509338	0.0295055	0.709033	1.73515	2	11	GRB2,SHC1,GAB2,FYN,LYN,PDPK1,PIK3CA
246	REACTOME_IRE1ALPHA_ACTIVATES_CHAPERONES	0.00403769	0.0270633	0.501512	1.72845	2	47	ATP6V0D1,HDGF,LMNA,TLN1,SHC1,MYDGF,ADD1,YIF1A,EDEM1,SYVN1,PDIA5,WFS1,CTDSP2,EXTL3,ERN1,PPP2R5B,SRPRA,HYOU1,CUL7,KLHDC3,ZBTB17,DNAJB11
247	REACTOME_SIGNAL_TRANSDUCTION_BY_L1	0.00949367	0.0415606	0.624229	1.72728	5	17	MAP2K2,CSNK2A2,ITGA5,VAV2,NRP1,EGFR,MAPK3,ITGB3,ITGAV,MAPK1,MAP2K1
248	REACTOME_SIGNALING_BY_ERBB2	0.00404858	0.0270633	0.499643	1.72584	2	48	PRKCD,GRB2,EREG,SHC1,SRC,AKT1,NRG2,PTPN12,DIAPH1,FYN,EGFR,YES1,HRAS,PTK6,EGF,ERBB2,KRAS,RNF41,GRB7,AKT2,PTPN18,PIK3CA,ERBIN,STUB1
249	REACTOME_SENSORY_PROCESSING_OF_SOUND_BY_OUTER_HAIR_CELLS_OF_THE_COCHLEA	0.00549451	0.030842	0.51027	1.72464	3	42	ACTG1,MYO1C,ACTB,MYH9,EPB41L1,GSN,TWF2,KCNMA1,USH1G,CASK,EPS8L2,SPTBN1,TRIOBP,SPTAN1,TMIE,TMC1,TPRN
250	REACTOME_FORMATION_OF_SENESCENCE_ASSOCIATED_HETEROCHROMATIN_FOCI_SAHF	0.016	0.0595289	0.647022	1.72437	9	15	TP53,H1-0,HMGA1,H1-4,HIRA,UBN1,CDKN1A,HMGA2
251	REACTOME_TRANSCRIPTIONAL_REGULATION_BY_RUNX1	0.0010929	0.0175605	0.413088	1.72342	0	189	PML,SMARCA4,CBX4,MYL9,CCND1,LIFR,HIPK2,CSF2,CSNK2A2,ABL1,KMT2E,THBS1,H2BC21,CBX6,PHC2,PSMA6,SMARCC1,MOV10,CCND3,SRC,CLDN5,SMARCB1,CDK6,PSMD3,TNRC6B,ARID1B,LMO2,PSMB9,PCGF5,KMT2C,SOCS3,AXIN1,CREBBP,PSMB10,EP300,PRMT6,AGO2,CCND2,ARID1A,H2BC7,PSMF1,RING1,TJP1,H4C4,H2BC6,H3C13,WDR5,SETD1A,GATA3,SMARCD1,PSMB8,PSME3,NFATC2,TNRC6C,KAT2B,RUNX1,YAP1,AGO1,PSME2,TCF3,ESR1,SMARCC2
252	REACTOME_NUCLEOTIDE_BINDING_DOMAIN_LEUCINE_RICH_REPEAT_CONTAINING_RECEPTOR_NLR_SIGNALING_PATHWAYS	0.0026455	0.0230683	0.492233	1.72261	1	52	TNFAIP3,RELA,IRAK1,IRAK2,BIRC3,HMOX1,AIM2,APP,TAB1,NOD2,NFKB2,NFKB1,CYLD,MAPK14,TAB2,MAPK13,TAB3,NOD1,BCL2L1,PYCARD,RIPK2,CASP1
253	REACTOME_G_BETA_GAMMA_SIGNALLING_THROUGH_CDC42	0.00503356	0.0295055	0.719116	1.72173	2	10	GNB2,GNB4,GNB1,GNG4
254	REACTOME_SIGNAL_ATTENUATION	0.00683761	0.033327	0.744319	1.72141	3	9	GRB10,GRB2,IRS2,SHC1,INSR,IRS1,MAPK3,MAPK1
255	REACTOME_SIGNALING_BY_FGFR1	0.00724638	0.034691	0.52786	1.72039	4	36	SPRED1,GRB2,SHC1,SRC,PPP2R1A,FGFRL1,SPRY2,FGF1,PPP2CB,HRAS,CBL,MAPK3,SPRED2,KRAS,FLRT2,PIK3CA,MAPK1,MKNK1
256	REACTOME_L1CAM_INTERACTIONS	0.00124844	0.0175605	0.453942	1.72002	0	89	ACTG1,ACTB,AP2A1,AP2A2,MAP2K2,RPS6KA2,CLTA,CSNK2A2,ITGA5,RPS6KA4,TUBB2A,EPHB2,SRC,VAV2,NRP1,DNM2,SPTBN1,LAMC1,EGFR,LAMA1,ITGA1,ANK1,SPTBN5,RPS6KA1,TUBB4B,SPTAN1,MAPK3,TUBB6,ITGB3,DLG1,ITGAV,LAMB1,RPS6KA3,AP2M1,MAPK1,TUBA3D,SPTBN2,MAP2K1,CLTC,DNM3,NRCAM,AP2S1
257	REACTOME_COLLAGEN_FORMATION	0.00257732	0.0230683	0.470277	1.71604	1	67	MMP9,COL4A2,LAMC2,LAMA3,MMP13,P4HB,LAMB3,P3H2,COL17A1,PLOD3,ITGB4,PLOD1,LOXL2,LOXL4,BMP1,PXDN,PLEC,COL9A2,COL18A1,CD151,COL16A1,COLGALT1,COL27A1
258	REACTOME_ACTIVATION_OF_THE_TFAP2_AP_2_FAMILY_OF_TRANSCRIPTION_FACTORS	0.00683761	0.033327	0.741695	1.71535	3	9	TFAP2A,CITED4,CITED2,CREBBP,EP300,TFAP2C
259	REACTOME_RUNX3_REGULATES_P14_ARF	0.00671141	0.033243	0.715693	1.71353	3	10	CCND1,TGFB1,EP300,BRD2,CDKN2A,RUNX1,KRAS,RUNX3,HDAC4
260	REACTOME_SIGNALING_BY_HIPPO	0.00923077	0.0410795	0.598426	1.71321	5	20	LATS2,DVL2,AMOTL2,SAV1,WWC1,TJP2,LATS1,AMOT,TJP1,AMOTL1,YAP1,WWTR1,MOB1A
261	REACTOME_DEFECTIVE_EXT2_CAUSES_EXOSTOSES_2	0.00825082	0.0383057	0.670252	1.71166	4	13	AGRN,EXT1,HSPG2,GPC6,SDC1,SDC3,SDC4,GPC4,GPC1,GPC2
262	REACTOME_REGULATION_OF_IFNA_SIGNALING	0.00673401	0.033243	0.684747	1.70618	3	12	STAT1,USP18,STAT2,SOCS1,SOCS3,JAK1
263	REACTOME_IL_6_TYPE_CYTOKINE_RECEPTOR_LIGAND_INTERACTIONS	0.00990099	0.0424215	0.66797	1.70583	5	13	LIFR,CRLF1,JAK2,LIF,CTF1,JAK1,OSMR
264	REACTOME_G_PROTEIN_BETA_GAMMA_SIGNALLING	0.0109718	0.0457916	0.609254	1.70543	6	18	GNB2,PLCB3,GNB4,GNB1,GNG4,AKT1,PDPK1,AKT2
265	REACTOME_OPIOID_SIGNALLING	0.00257732	0.0230683	0.467353	1.70537	1	67	PRKACA,GNB2,PRKCD,PLCB3,GNB4,GNB1,GNG4,GNAI2,GNA15,GNA11,PPP2R1A,AHCYL1,GRK2,ADCY9,PRKX,ADCY7,PPP2CB,ITPR1,ITPR2,CAMKK2,PPP3R1,ITPR3,PPP1CA,PPP3CA,ADCY5,PRKAR1B,ADCY4
266	REACTOME_SIGNALING_BY_RHO_GTPASES_MIRO_GTPASES_AND_RHOBTB3	0.00100705	0.0175605	0.382681	1.70528	0	638	PKN1,CAPZB,RHOB,NCK2,ARHGAP17,EPSTI1,CDC42EP1,ACTN1,JUP,ACTG1,PRKCD,FLNA,MYH14,DVL2,MYL9,MRTFA,ACTB,MYH9,EMD,ARHGAP1,RCC2,ARHGDIA,ARHGEF18,ARHGAP26,EFHD2,PAK4,PTK2B,WHAMM,CDC42EP5,SEMA4F,IL32,CSK,CDH1,STK10,ABL1,PRAG1,GRB2,FMNL3,AKAP12,DYNC1H1,ANKFY1,TUBB2A,CDC42BPB,EPHA2,NCF1,RND1,H2BC21,NSFL1C,ARHGAP27,TRIP10,WASL,RHOG,SRC,MTMR1,WIPF2,TRIO,CAVIN1,JAG1,PLEKHG6,PRKCZ,PLEKHG3,SRF,DBN1,TJP2,PLXNA1,…
267	REACTOME_NEUTROPHIL_DEGRANULATION	0.0010395	0.0175605	0.390331	1.70372	0	385	MMP9,PLAU,BST2,CTSD,TMBIM1,HSPA6,JUP,LTF,HLA-A,PRKCD,RAP2B,HSPA1A,CAPN1,COTL1,AGPAT2,EEF2,AP1M1,MVP,CTSA,LAMP1,FTH1,AP2A2,QSOX1,IGF2R,PLAUR,CNN2,PDAP1,STK10,DYNC1H1,TOLLIP,TRAPPC1,CTSZ,ACLY,ACTR1B,CYB5R3,HSPA1B,GSN,TIMP2,FUCA1,AOC1,RHOG,CD47,KPNB1,MME,APEH,PTPRJ,MAN2B1,HUWE1,ADGRE5,TOM1,SURF4,UBR4,CEACAM1,HLA-B,PSMD3,RAB6A,SIRPA,PKM,CKAP4,NAPRT,HLA-C,METTL7A,MLEC,GRN,DNAJC5,CANT1,ADAM8,TLR2,RAB5C…
268	REACTOME_RECYCLING_PATHWAY_OF_L1	0.0058309	0.0315085	0.5211	1.70295	3	37	ACTG1,ACTB,AP2A1,AP2A2,RPS6KA2,CLTA,RPS6KA4,TUBB2A,SRC,DNM2,RPS6KA1,TUBB4B,TUBB6,RPS6KA3,AP2M1,MAPK1,TUBA3D,CLTC,DNM3,AP2S1
269	REACTOME_MATURATION_OF_SARS_COV_2_NUCLEOPROTEIN	0.0176	0.0636005	0.638336	1.70122	10	15	PARP14,PARP10,PARP9,PARP8,CSNK1A1,GSK3A
270	REACTOME_RHOF_GTPASE_CYCLE	0.00566572	0.0312585	0.512239	1.70058	3	39	CAPZB,ACTN1,ACTB,ARHGAP1,AKAP12,MTMR1,DIAPH1,CAV1,ESYT1,BAIAP2L1,MYO9B,FAM169A,VANGL1,FARP1,SNAP23,ARHGAP21,SRGAP2,ARHGAP32,STEAP3
271	REACTOME_ACTIVATION_OF_NOXA_AND_TRANSLOCATION_TO_MITOCHONDRIA	0.00541516	0.0307177	0.867604	1.70014	2	5	TP53,PMAIP1,E2F1,TFDP1,TFDP2
272	REACTOME_GASTRIN_CREB_SIGNALLING_PATHWAY_VIA_PKC_AND_MAPK	0.0172414	0.0626995	0.624585	1.69918	10	16	RPS6KA2,GRB2,EGFR,HRAS,RPS6KA1,MAPK3,KRAS,RPS6KA3,MAPK1,HBEGF,SOS1
273	REACTOME_RESPONSE_TO_ELEVATED_PLATELET_CYTOSOLIC_CA2	0.00119904	0.0175605	0.439297	1.69809	0	98	FN1,SPARC,TOR4A,SERPINE1,ACTN1,FLNA,PDGFB,TLN1,ECM1,ACTN4,QSOX1,WDR1,GTPBP2,THBS1,GAS6,LGALS3BP,STX4,APP,CAP1,BRPF3,TGFB1,RAB27B,ENDOD1,FAM3C,TGFB2,CFL1,STXBP2,HABP4,SERPING1,EGF,VEGFA,VEGFB,PCDH7,ITGB3,PHACTR2,SERPINA3,TMSB4X,APLP2,PCYOX1L
274	REACTOME_REGULATION_OF_TP53_EXPRESSION_AND_DEGRADATION	0.0058309	0.0315085	0.51918	1.69667	3	37	PRDM1,TP53,AKT1,PPP2R1A,RFFL,MAPKAP1,MDM2,PPP2CB,MTOR,USP7,PDPK1,USP2,CDKN2A,PHF20,AKT2,MLST8
275	REACTOME_REGULATION_OF_PTEN_MRNA_TRANSLATION	0.00683761	0.033327	0.733212	1.69573	3	9	MOV10,TNRC6B,AGO2,TNRC6C,AGO1,TNRC6A
276	REACTOME_G_BETA_GAMMA_SIGNALLING_THROUGH_PI3KGAMMA	0.00841751	0.0386342	0.680046	1.69446	4	12	GNB2,GNB4,GNB1,GNG4,AKT1,PDPK1,AKT2
277	REACTOME_ACTIVATION_OF_KAINATE_RECEPTORS_UPON_GLUTAMATE_BINDING	0.0188088	0.066304	0.622714	1.69409	11	16	GNB2,PLCB3,GNB4,GNB1,GNG4
278	REACTOME_SIGNALING_BY_FLT3_FUSION_PROTEINS	0.0125392	0.049527	0.604942	1.69336	7	18	PIM1,GRB2,STAT5A,GAB2,CDKN1A,MYO18A,SPTBN1,HRAS,STAT5B,ETV6,KRAS,PIK3CA
279	REACTOME_INITIATION_OF_NUCLEAR_ENVELOPE_NE_REFORMATION	0.0124417	0.0494902	0.598982	1.69238	7	19	LMNA,EMD,KPNB1,PPP2R1A,LEMD2,PPP2R2A,ANKLE2,SIRT2
280	REACTOME_TRANSLATION_OF_SARS_COV_1_STRUCTURAL_PROTEINS	0.0058997	0.0316814	0.544289	1.69164	3	28	PARP14,PARP10,PARP9,PRKCSH,MGAT1,ST3GAL1,MOGS,ST6GALNAC2,ST3GAL4,ST6GALNAC4,PARP8
281	REACTOME_NUCLEAR_EVENTS_STIMULATED_BY_ALK_SIGNALING_IN_CANCER	0.0124417	0.0494902	0.598204	1.69019	7	19	FN1,JUNB,CEBPB,STAT5A,STAT3,MECP2,BCL2A1
282	REACTOME_TNF_SIGNALING	0.00686813	0.033327	0.499913	1.68964	4	42	TNFAIP3,RBCK1,TNFRSF1A,BIRC3,RIPK1,CFLAR,TAB1,TRADD,OTUD7B,CYLD,TAB2,TAB3,USP2,MADD,FADD,IKBKG,XIAP,TRAF1
283	REACTOME_DEVELOPMENTAL_BIOLOGY	0.001002	0.0175605	0.375933	1.68726	0	777	JUN,HELZ2,SEMA7A,MMP9,PML,PRKACA,NTN1,RHOB,COL4A2,NCK2,MMP2,DRAP1,EGR2,JUP,ACTG1,CEBPB,SMARCA4,PPL,PKP3,RELA,MYH14,MYL9,CAPN1,RARA,GATA6,ACTB,AGRN,MYH9,SOX9,EIF4G1,TLN1,AP2A1,AP2A2,FOXA2,ST14,MYO10,RNPS1,PAK4,MAP2K2,RPS6KA2,CLTA,GRB10,CSNK2A2,ABL1,GRB2,HES1,RAP1GAP,IRS2,ITGA5,RPS6KA4,SH3KBP1,DAG1,EPHB4,APH1A,TUBB2A,EPHB2,EPHA2,RND1,H2BC21,KLF4,PSMA6,AJUBA,KRT6B,SHC1,SOX2,WASL,POLR2A,TBL1X,CCND3,S…
284	REACTOME_INSULIN_RECEPTOR_SIGNALLING_CASCADE	0.00725689	0.034691	0.523559	1.68676	4	33	GRB10,GRB2,IRS2,SHC1,GAB2,INSR,TRIB3,FGF1,HRAS,IRS1,PDPK1,MAPK3,KRAS,AKT2,PIK3CA,MAPK1
285	REACTOME_SHC1_EVENTS_IN_ERBB2_SIGNALING	0.0124031	0.0494902	0.585549	1.68664	7	21	PRKCD,GRB2,EREG,SHC1,NRG2,PTPN12,EGFR,HRAS,EGF,ERBB2,KRAS
286	REACTOME_ESTROGEN_DEPENDENT_GENE_EXPRESSION	0.00118343	0.0175605	0.428088	1.68654	0	117	JUN,FOSB,CTSD,FOS,GTF2F1,CCND1,CXXC5,H2BC21,USF2,POLR2A,MOV10,JUND,TNRC6B,CARM1,ZNF217,AXIN1,KDM4B,CREBBP,NCOA3,EP300,YY1,AGO2,H2BC7,CDK9,NCOA1,POU2F1,H4C4,TLE3,H2BC6,H3C13,GATA3,SP1,POLR2D,TNRC6C,KANK1,KAT2B,RUNX1,AGO1,ESR1,NCOA2,MYC,KAT5
287	REACTOME_INTERLEUKIN_RECEPTOR_SHC_SIGNALING	0.0124417	0.0494902	0.595537	1.68265	7	19	CSF2,GRB2,SHC1,JAK2,GAB2,INPP5D,JAK1
288	REACTOME_COMPETING_ENDOGENOUS_RNAS_CERNAS_REGULATE_PTEN_TRANSLATION	0.0100671	0.0429051	0.746798	1.68175	5	8	MOV10,TNRC6B,AGO2,TNRC6C,AGO1,TNRC6A
289	REACTOME_REGULATION_OF_TNFR1_SIGNALING	0.00870827	0.0394074	0.521722	1.68084	5	33	TNFAIP3,RBCK1,TNFRSF1A,BIRC3,RIPK1,CFLAR,TRADD,OTUD7B,CYLD,USP2,MADD,FADD,IKBKG,XIAP,TRAF1
290	REACTOME_ELEVATION_OF_CYTOSOLIC_CA2_LEVELS	0.00854701	0.0390063	0.726519	1.68025	4	9	STIM1,ORAI1,ITPR1,ITPR2,ITPR3
291	REACTOME_SIGNALING_BY_PDGFRA_TRANSMEMBRANE_JUXTAMEMBRANE_AND_KINASE_DOMAIN_MUTANTS	0.0135823	0.0523473	0.685344	1.67718	7	11	STAT1,GRB2,STAT3,HRAS,KRAS,PIK3CA
292	REACTOME_AQUAPORIN_MEDIATED_TRANSPORT	0.00870827	0.0394074	0.520403	1.67659	5	33	PRKACA,GNB2,GNB4,GNB1,GNG4,GNAS,ADCY9,ADCY7,MYO5B,ADCY5,PRKAR1B,ADCY4
293	REACTOME_C_TYPE_LECTIN_RECEPTORS_CLRS	0.00117371	0.0175605	0.421771	1.6764	0	125	CARD11,PRKACA,PRKCD,RELA,UBE2D2,CCL22,RELB,NFATC1,PSMA6,SRC,NFKBIA,PSMD3,CDC34,PSMB9,MAP3K14,UBE2M,TAB1,CREBBP,AHCYL1,NFKB2,PSMB10,MUC20,NFKB1,EP300,TAB2,FYN,BCL10,PSMF1,ITPR1,TAB3,HRAS,ITPR2,PPP3R1,MUC16,ITPR3,PAK2,PSMB8,PYCARD,LYN,PDPK1,PSME3,NFATC2,PSME2,MALT1,IL1B,MUC21,PPP3CA
294	REACTOME_FIBRONECTIN_MATRIX_FORMATION	0.0108303	0.0455023	0.855436	1.67629	5	5	FN1,ITGA5,CEACAM1
295	REACTOME_FACTORS_INVOLVED_IN_MEGAKARYOCYTE_DEVELOPMENT_AND_PLATELET_PRODUCTION	0.00118624	0.0175605	0.424189	1.67573	0	119	WEE1,CAPZB,PRKACA,TP53,IRF1,MAFF,EHD2,GATA6,ACTB,KIF13B,EHD1,ABL1,KIF26B,KIF1C,TUBB2A,ITPK1,JAK2,SH2B2,RCOR1,DOCK1,SH2B3,MAFG,DOCK9,DOCK6,KLC1,H3C13,IRF2,GATA3,KIF19,KIF21B,TUBB4B,CBX5,KLC2,TUBB6,PRKAR1B,MAFK,H3C6,MFN2,ZFPM1,EHD3
296	REACTOME_SEMA4D_MEDIATED_INHIBITION_OF_CELL_ATTACHMENT_AND_MIGRATION	0.0100671	0.0429051	0.743757	1.6749	5	8	RND1,RRAS,ARHGAP35,MET
297	REACTOME_G_ALPHA_Q_SIGNALLING_EVENTS	0.00240674	0.0230683	0.430511	1.67154	1	107	GNB2,PRKCD,RPS6KA2,PLCB3,GRB2,GNB4,GNB1,GNG4,ABHD12,GNA15,TRIO,GNA11,MGLL,RGS19,APP,EDN1,GRK2,DAGLA,EGFR,NPFFR2,ITPR1,PTAFR,HRAS,ITPR2,ITPR3,EDNRA,ANXA1,RPS6KA1,MAPK3,F2RL1,KRAS,RGS3,RGS16,DGKZ,RGS17,RPS6KA3,PIK3CA,MAPK1,NMB,LPAR2,DGKQ,OXTR
298	REACTOME_RHOU_GTPASE_CYCLE	0.00714286	0.0344525	0.507379	1.67115	4	38	NCK2,PAK4,PTK2B,GRB2,EPHA2,SRC,SPTBN1,WWP2,VANGL1,PAK2,PEAK1,SPTAN1,USP9X,PARD6A,SRGAP2,ARHGEF7,CLTC,ITSN2
299	REACTOME_GLYCOSAMINOGLYCAN_METABOLISM	0.00119904	0.0175605	0.431861	1.66963	0	99	AGRN,B4GALT5,B4GALT7,EXT1,SLC9A1,ST3GAL1,CHPF,HS3ST1,CHST11,HSPG2,SLC35D2,NDST1,NAGLU,B3GNT7,CHP1,CHST14,B4GALT2,GPC6,SDC1,CSPG4,B3GNT3,ST3GAL4,CHST2,HAS2,CHST7,SLC35B2,SDC3,GLB1L,HPSE,HAS3,GUSB,CHSY1,CHPF2,XYLT2,GNS,CHST6,SDC4,ST3GAL3,IDUA,HGSNAT,HS6ST1
300	REACTOME_LDL_CLEARANCE	0.0172414	0.0626995	0.595091	1.66578	10	18	LSR,AP2A1,AP2A2,LDLR,CLTA,NPC1,LDLRAP1
301	REACTOME_SIGNALING_BY_WNT	0.00107066	0.0175605	0.389267	1.66376	0	257	WNT7A,GNB2,SMARCA4,DVL2,SOX9,AP2A1,AP2A2,CLTA,CSNK2A2,PLCB3,SOX4,GNB4,NFATC1,GNB1,WNT7B,H2BC21,GNG4,FZD5,PSMA6,SOX2,MOV10,FZD1,SMURF1,CTNNBIP1,CHD8,AKT1,PSMD3,TNRC6B,TCF7L1,ZNRF3,PSMB9,TCF7L2,CSNK1G2,AXIN1,SNX3,PPP2R1A,SCRIB,TLE5,CREBBP,CUL3,PSMB10,PORCN,TLE4,EP300,TLE1,CTBP2,CAV1,AGO2,WNT3,H2BC7,PPP2CB,PSMF1,CTBP1,ITPR1,RAC2,H4C4,TLE3,ITPR2,H2BC6,DVL3,TRRAP,PPP3R1,H3C13,KREMEN1,ITPR3,PSMB8,PPP2R…
302	REACTOME_ADRENALINE_NORADRENALINE_INHIBITS_INSULIN_SECRETION	0.0272	0.0872892	0.622867	1.65999	16	15	GNB2,GNB4,GNB1,GNG4,GNAI2
303	REACTOME_SPHINGOLIPID_DE_NOVO_BIOSYNTHESIS	0.00674764	0.033243	0.487427	1.65988	4	43	PRKD2,SPHK1,SPNS2,OSBP,DEGS2,SGPP2,ALDH3B2,VAPB,CSNK1G2,CERT1,ORMDL3,KDSR,ACER2,FA2H,SGPP1,CERS6,SGPL1,DEGS1,PLPP3
304	REACTOME_APOPTOTIC_EXECUTION_PHASE	0.00809717	0.0379202	0.480486	1.65967	5	48	H1-0,PRKCD,LMNA,CDH1,GSN,KPNB1,H1-4,TJP2,ADD1,VIM,PLEC,BMX,DSP,TJP1,PAK2,SPTAN1,STK24,DFFB,PKP1,ROCK1
305	REACTOME_RHO_GTPASES_ACTIVATE_ROCKS	0.0155521	0.0579964	0.58673	1.65777	9	19	RHOB,MYH14,MYL9,MYH9,LIMK1,CFL1,RHOC,MYH10,ROCK1
306	REACTOME_SUMOYLATION_OF_TRANSCRIPTION_COFACTORS	0.00674764	0.033243	0.486558	1.65692	4	43	TRIM28,CBX4,MRTFA,HIPK2,PIAS4,PHC2,SAFB,MBD1,CREBBP,EP300,CTBP1,RING1,NCOA1,NCOA2,CBX8,NCOR2,SUMO3,NRIP1,PCGF2
307	REACTOME_ERYTHROPOIETIN_ACTIVATES_RAS	0.00990099	0.0424215	0.648286	1.65556	5	13	GRB2,IRS2,SHC1,JAK2,RAPGEF1,VAV1,HRAS,LYN,KRAS
308	REACTOME_UNFOLDED_PROTEIN_RESPONSE_UPR	0.00249066	0.0230683	0.438246	1.65544	1	86	ATF3,ATP6V0D1,CEBPB,HDGF,LMNA,TLN1,KHSRP,SHC1,MYDGF,ADD1,YIF1A,DDIT3,EDEM1,MBTPS1,SYVN1,PDIA5,WFS1,CTDSP2,EXTL3,ERN1,CREB3L1,PPP2R5B,SRPRA,HYOU1,EIF2AK3,EXOSC6,CREB3L2,CUL7,KLHDC3,ZBTB17,DNAJB11
309	REACTOME_REPRESSION_OF_WNT_TARGET_GENES	0.0176	0.0636005	0.633871	1.65213	10	14	TCF7L1,TCF7L2,TLE5,TLE4,TLE1,CTBP2,CTBP1,TLE3,MYC
310	REACTOME_CYTOSOLIC_SENSORS_OF_PATHOGEN_ASSOCIATED_DNA	0.00522193	0.0299378	0.458912	1.6518	3	62	IRF7,TICAM1,RELA,ZBP1,POLR3D,TRIM21,TRIM56,DHX36,NFKBIA,RIPK1,AIM2,CREBBP,TLR3,NFKB2,NFKB1,EP300,NFKBIB,MYD88,NKIRAS2,IRF3,IFI16,POLR3E
311	REACTOME_NETRIN_1_SIGNALING	0.0113314	0.0466879	0.497406	1.65133	7	39	NTN1,MYO10,WASL,SRC,TRIO,DOCK1,PITPNA,MAPK14,FYN,MAPK13,ABLIM3,UNC5B,NTN4,UNC5C,SIAH1
312	REACTOME_WNT5A_DEPENDENT_INTERNALIZATION_OF_FZD2_FZD5_AND_ROR2	0.0135823	0.0523473	0.673503	1.6482	7	11	AP2A1,AP2A2,CLTA,FZD5,AP2M1,CLTC,AP2S1,CLTB
313	REACTOME_NCAM_SIGNALING_FOR_NEURITE_OUT_GROWTH	0.00831025	0.0383571	0.492739	1.64775	5	40	COL4A2,AGRN,GRB2,SRC,ARTN,COL9A2,CACNB1,SPTBN1,FYN,HRAS,PTPRA,SPTBN5,PSPN,SPTAN1,MAPK3,KRAS,PRNP,COL4A1,MAPK1,SPTBN2
314	REACTOME_EGFR_DOWNREGULATION	0.00877193	0.0395843	0.517808	1.64713	5	30	GRB2,SH3KBP1,EREG,SH3GL1,EPS15L1,PTPRK,EPN1,PTPN12,SPRY2,EGFR,EPGN,EGF,CBL,SPRY1,AREG,TGFA,ARHGEF7,BTC
315	REACTOME_PECAM1_INTERACTIONS	0.0135823	0.0523473	0.672974	1.64691	7	11	SRC,INPP5D,FYN,YES1,LYN,ITGB3,ITGAV
316	REACTOME_NOTCH_HLH_TRANSCRIPTION_PATHWAY	0.0103245	0.0437704	0.529737	1.64641	6	28	HDAC9,NOTCH2,HDAC11,TBL1X,HDAC5,CREBBP,HDAC6,NOTCH3,HDAC7,KAT2B,MAML2,NOTCH1,NCOR2
317	REACTOME_PLASMA_LIPOPROTEIN_CLEARANCE	0.0176471	0.0636005	0.531564	1.64533	11	27	LSR,AP2A1,AP2A2,LDLR,CLTA,SCARB1,NPC1,LDLRAP1
318	REACTOME_SIGNALING_BY_NOTCH	0.00109409	0.0175605	0.392893	1.64513	0	196	JUN,STAT1,TP53,HDAC9,CCND1,NOTCH2,HES1,WWC1,HDAC11,APH1A,H2BC21,PSMA6,TBL1X,MOV10,JAG1,MDK,FURIN,HDAC5,AKT1,PSMD3,TNRC6B,RAB6A,PSMB9,CREBBP,ELF3,PSMB10,SMAD3,TLE4,EP300,YBX1,TLE1,AGO2,HDAC6,H2BC7,WWP2,NOTCH3,EGFR,PSMF1,HDAC7,ST3GAL4,SIRT6,H4C4,TLE3,H2BC6,RFNG,H3C13,ATP2A2,EGF,PSMB8,PSME3,TNRC6C,KAT2B,RUNX1,AGO1,PSME2,NCSTN,NEURL1B,ACTA2,MYC,PLXND1,MAML2,ARRB2,NOTCH1,H3C6,ARRB1,DTX2,POFUT1,DTX4,NC…
319	REACTOME_ARACHIDONATE_PRODUCTION_FROM_DAG	0.0126354	0.049527	0.838892	1.64387	6	5	ABHD12,MGLL,DAGLA
320	REACTOME_PTEN_REGULATION	0.00351288	0.0242886	0.410516	1.64147	2	134	JUN,EGR1,PML,TP53,CBX4,GATAD2A,CSNK2A2,GATAD2B,MAF1,CBX6,PHC2,PSMA6,MOV10,RCOR1,SNAI2,MTA2,HDAC5,AKT1,PSMD3,TNRC6B,RRAGC,PSMB9,RRAGD,PSMB10,RBBP7,AGO2,RRAGA,RHEB,WWP2,PSMF1,HDAC7,RING1,MTOR,RPTOR,USP7,PSMB8,PSME3,TNRC6C,AGO1,PSME2,LAMTOR1,MAPK3,CBX8
321	REACTOME_DEPOLYMERISATION_OF_THE_NUCLEAR_LAMINA	0.0192	0.0670959	0.629016	1.63947	11	14	LMNA,EMD,LPIN1,LEMD2,CNEP1R1,LPIN2
322	REACTOME_SUMOYLATION_OF_IMMUNE_RESPONSE_PROTEINS	0.0169779	0.062304	0.669705	1.63891	9	11	RELA,PIAS4,NFKBIA,NFKB2,SUMO3,IKBKG,PIAS3,IKBKE,UBE2I
323	REACTOME_OXIDATIVE_STRESS_INDUCED_SENESCENCE	0.00363196	0.0250047	0.425631	1.63846	2	95	JUN,TP53,FOS,CBX4,CDKN2B,MAP2K3,H2BC21,CBX6,PHC2,MOV10,MAPKAPK2,CDK6,TNRC6B,RBBP7,MAPK14,H2BC7,MDM2,RING1,H4C4,MAP4K4,H2BC6,H3C13,MAP2K7,TNRC6C,CDKN2A,AGO1,MAPK3,CBX8,MINK1,H3C6
324	REACTOME_ONCOGENE_INDUCED_SENESCENCE	0.011611	0.0472434	0.50851	1.63828	7	33	TP53,CDKN2B,ETS1,MOV10,CDK6,TNRC6B,ERF,MDM2,SP1,TNRC6C,CDKN2A,AGO1,MAPK3,TNRC6A,MAPK1
325	REACTOME_NEGATIVE_REGULATION_OF_TCF_DEPENDENT_SIGNALING_BY_DVL_INTERACTING_PROTEINS	0.0126354	0.049527	0.834438	1.63515	6	5	DVL2,DVL3,DVL1
326	REACTOME_SIGNALING_BY_ERBB2_ECD_MUTANTS	0.0282132	0.0900028	0.600861	1.63464	17	16	GRB2,SHC1,EGFR,HRAS,EGF,ERBB2,KRAS,PIK3CA,ERBIN
327	REACTOME_SPHINGOLIPID_METABOLISM	0.00252207	0.0230683	0.436916	1.63372	1	81	PRKD2,SPHK1,CTSA,SPNS2,OSBP,DEGS2,SGPP2,SMPD1,ALDH3B2,VAPB,ARSJ,STS,CSNK1G2,CERT1,ARSA,ORMDL3,ESYT1,KDSR,ARSI,SUMF2,CPTP,ACER2,NEU1,GLB1L,FA2H,SGPP1,CERS6,SGPL1,DEGS1,ARSD,PLPP3
328	REACTOME_OTHER_INTERLEUKIN_SIGNALING	0.0250784	0.0826202	0.58277	1.63129	15	18	CSF1,IFNLR1,IL32,STX4,SDC1,STXBP2,JAK1,STX1A,TXLNA,TYK2,VAMP2,STX3
329	REACTOME_CONSTITUTIVE_SIGNALING_BY_AKT1_E17K_IN_CANCER	0.0177778	0.0637862	0.530912	1.62952	11	26	AKT1S1,NR4A1,AKT1,CDKN1A,FOXO3,MAPKAP1,CDKN1B,MDM2,MTOR,RPS6KB2,PDPK1,AKT2,MLST8,RICTOR,GSK3A,FOXO4,TSC2,AKT3,PRR5
330	REACTOME_VEGF_LIGAND_RECEPTOR_INTERACTIONS	0.0204778	0.070042	0.747923	1.62935	11	7	PGF,VEGFA,KDR,VEGFB,VEGFC
331	REACTOME_CLEC7A_DECTIN_1_SIGNALING	0.00119904	0.0175605	0.42129	1.62848	0	98	CARD11,PRKCD,RELA,UBE2D2,CCL22,RELB,NFATC1,PSMA6,SRC,NFKBIA,PSMD3,CDC34,PSMB9,MAP3K14,UBE2M,TAB1,AHCYL1,NFKB2,PSMB10,NFKB1,TAB2,BCL10,PSMF1,ITPR1,TAB3,ITPR2,PPP3R1,ITPR3,PSMB8,PYCARD,PDPK1,PSME3,NFATC2,PSME2,MALT1,IL1B,PPP3CA
332	REACTOME_PRE_NOTCH_PROCESSING_IN_GOLGI	0.0221519	0.0746584	0.588254	1.62774	13	17	NOTCH2,FURIN,RAB6A,NOTCH3,ST3GAL4,RFNG,ATP2A2,NOTCH1,ST3GAL3,B4GALT1
333	REACTOME_TRANSCRIPTIONAL_ACTIVATION_OF_MITOCHONDRIAL_BIOGENESIS	0.00655308	0.0330941	0.461552	1.62718	4	55	HELZ2,NR1D1,ESRRA,PPRC1,TBL1X,CARM1,MEF2D,CRTC3,SOD2,CREBBP,CRTC2,RXRA,NCOA1,HCFC1,TWNK,NCOA2,NCOA6,PPARA
334	REACTOME_O_LINKED_GLYCOSYLATION_OF_MUCINS	0.012016	0.048471	0.467087	1.62617	8	51	GALNT2,B4GALT5,ST3GAL1,B3GNT9,GALNT5,B3GNT7,GALNT14,MUC20,GCNT4,ST6GALNAC2,B3GNT3,GALNT10,ST3GAL4,MUC16,ST6GALNAC4,C1GALT1,CHST4,MUC21,B3GNT8,MUC15,GALNT7,ST3GAL3,B3GNT6
335	REACTOME_CARGO_RECOGNITION_FOR_CLATHRIN_MEDIATED_ENDOCYTOSIS	0.00369004	0.0251892	0.425549	1.62586	2	91	TOR1B,DVL2,UBQLN2,AP2A1,AP2A2,IGF2R,LDLR,CLTA,FCHO1,GRB2,SH3KBP1,EREG,SH3GL1,COPS7A,SCARB2,EPS15L1,EPN1,LDLRAP1,GRK2,ITSN1,EGFR,EPGN,ADRB2,EGF,UBQLN1,STON2,CBL,AAK1,ARRB2,ARRB1,EPN2,PICALM,IL7R,DAB2,AP2M1,SYT11,STON1,AREG,TGFA,TFRC,GRK3,CLTC,BTC,AP2S1,ITSN2,CLTB
336	REACTOME_TRP_CHANNELS	0.0336	0.100962	0.610055	1.62585	20	15	MLKL,RIPK1,MCOLN1,TRPV3,TRPM4,MCOLN3,TRPC1,TRPV6,RIPK3,TRPC4AP
337	REACTOME_SIGNALING_BY_MAPK_MUTANTS	0.0204778	0.070042	0.745669	1.62444	11	7	DUSP8,DUSP10,DUSP9,DUSP6,DUSP16,MAPK1,DUSP7
338	REACTOME_CLEC7A_INFLAMMASOME_PATHWAY	0.0126812	0.0495858	0.794955	1.62354	6	6	RELA,NFKB1,PYCARD,MALT1,IL1B
339	REACTOME_IKBA_VARIANT_LEADS_TO_EDA_ID	0.0204778	0.070042	0.745015	1.62301	11	7	RELA,NFKBIA,NFKB2,NFKB1,IKBKG
340	REACTOME_P75NTR_SIGNALS_VIA_NF_KB	0.0336	0.100962	0.6073	1.61851	20	15	RELA,IRAK1,NFKBIA,NFKB1,SQSTM1,MYD88,NGFR,RIPK2
341	REACTOME_EGFR_INTERACTS_WITH_PHOSPHOLIPASE_C_GAMMA	0.017094	0.0625874	0.699405	1.61754	9	9	EREG,EGFR,EPGN,EGF,AREG,TGFA,BTC,HBEGF
342	REACTOME_INWARDLY_RECTIFYING_K_CHANNELS	0.0256	0.0838244	0.619967	1.61589	15	14	GNB2,GNB4,GNB1,GNG4,KCNJ5
343	REACTOME_PROTEIN_FOLDING	0.00504414	0.0295055	0.432897	1.61357	3	77	GNB2,FBXW4,TP53,SPHK1,ACTB,CSNK2A2,GNB4,TUBB2A,GNB1,FBXO6,USP11,GNG4,GNA15,DCAF7,FKBP9,GNA11,SKIV2L,STAT3
344	REACTOME_MUSCLE_CONTRACTION	0.00239521	0.0230683	0.412462	1.61353	1	113	PRKACA,KCNQ1,MYL9,TLN1,HIPK2,STIM1,ORAI1,TPM1,ITGB5,CACNG4,SORBS3,VIM,TPM4,AHCYL1,CACNG6,RYR1,TNNT1,CACNB1,FXYD3,ITPR1,CALD1,PXN,ITGA1,ITPR2,ATP2A2,TNNT2,ITPR3,PAK2,KAT2B,ANXA1,ACTA2,WWTR1,FGF11,DYSF,FGF13,FKBP1B,KCNK6,VCL,TRPC1,ATP1A1,CACNB2,TMOD3,TTN,ANXA6,SCN4B,ATP1B1,MYLK
345	REACTOME_FC_EPSILON_RECEPTOR_FCERI_SIGNALING	0.00472813	0.0291804	0.409969	1.61274	3	116	JUN,CARD11,FOS,RELA,UBE2D2,GRB2,NFATC1,PSMA6,SHC1,NFKBIA,VAV2,PSMD3,CDC34,GAB2,PSMB9,TAB1,AHCYL1,PSMB10,VAV1,NFKB1,TAB2,FYN,BCL10,PSMF1,ITPR1,TAB3,HRAS,ITPR2,PPP3R1,ITPR3,PAK2,PSMB8,LYN,PDPK1,MAP2K7,PSME3,NFATC2,PSME2,MALT1,PPP3CA,MAPK3
346	REACTOME_CALCITONIN_LIKE_LIGAND_RECEPTORS	0.0126126	0.049527	0.87656	1.61007	6	4	ADM,ADM2,RAMP1
347	REACTOME_DISEASES_OF_GLYCOSYLATION	0.00475059	0.0291804	0.409732	1.60814	3	114	AGRN,CTSA,B4GALT7,THSD7A,THSD1,EXT1,ADAMTS1,NOTCH2,THBS1,ALG2,DAG1,HSPG2,SPON2,ALG12,NUS1,MOGS,CHST14,ADAMTS17,MAN1B1,GPC6,SDC1,CSPG4,MUC20,NOTCH3,MUC16,SDC3,ADAMTSL5,ADAMTS7,NEU1,C1GALT1,MUC21,ADAMTSL4,PMM2,THSD4,MUC15,CHSY1,NOTCH1,CHST6,SDC4,SPON1
348	REACTOME_PKA_ACTIVATION_IN_GLUCAGON_SIGNALLING	0.0272	0.0872892	0.616817	1.60768	16	14	PRKACA,GNAS,ADCY9,ADCY7,ADCY5,PRKAR1B,ADCY4,PRKACB,PRKAR2B,ADCY6
349	REACTOME_NICOTINATE_METABOLISM	0.0220588	0.0745006	0.518935	1.60624	14	27	PTGS2,PARP14,PARP10,PARP9,NADK,NAPRT,PARP8,CD38,NAMPT,NT5E,NAXE
350	REACTOME_NOSTRIN_MEDIATED_ENOS_TRAFFICKING	0.0144144	0.0548071	0.874071	1.60549	7	4	WASL,DNM2,CAV1
351	REACTOME_CONSTITUTIVE_SIGNALING_BY_EGFRVIII	0.0336	0.100962	0.602384	1.60541	20	15	GRB2,SHC1,EGFR,HRAS,EGF,CBL,KRAS,PIK3CA
352	REACTOME_DEACTIVATION_OF_THE_BETA_CATENIN_TRANSACTIVATING_COMPLEX	0.0141643	0.0543302	0.483296	1.60449	9	39	SOX9,SOX4,SOX2,CTNNBIP1,CHD8,AKT1,TCF7L1,TCF7L2,TLE4,TLE1,CTBP1,TLE3,BCL9L,SOX13,AKT2,SOX6,XIAP,PYGO2,PYGO1,XPO1,TLE2,MEN1,CTNNB1
353	REACTOME_FLT3_SIGNALING_IN_DISEASE	0.0209581	0.0715328	0.5304	1.60236	13	25	PIM1,GRB2,STAT5A,GAB2,CDKN1A,MYO18A,SPTBN1,HRAS,STAT5B,BCL2L1,CBL,ETV6,KRAS,PIK3CA
354	REACTOME_RAP1_SIGNALLING	0.0247525	0.0818814	0.627452	1.60236	14	13	PRKACA,SIPA1,RAP1GAP,RAPGEF3,PRKACB,RAPGEF4,RASGRP1,PRKG1
355	REACTOME_ENDOSOMAL_VACUOLAR_PATHWAY	0.0218121	0.0739774	0.668676	1.60096	12	10	HLA-A,HLA-B,HLA-E,HLA-F,HLA-C,CTSV,LNPEP
356	REACTOME_TRANSCRIPTIONAL_ACTIVITY_OF_SMAD2_SMAD3_SMAD4_HETEROTRIMER	0.0107672	0.0454081	0.466701	1.6003	7	45	JUNB,SERPINE1,CDKN2B,CCNK,SMAD3,CDK9,NEDD4L,SKI,TGIF2,TGIF1,SP1,WWTR1,MAPK3,MYC,RNF111,SMURF2,NCOR2,USP9X,PPM1A,MAPK1,TRIM33
357	REACTOME_SIGNALING_BY_NOTCH3	0.00961539	0.04173	0.472749	1.59783	6	42	STAT1,HES1,WWC1,APH1A,JAG1,CREBBP,EP300,YBX1,WWP2,NOTCH3,EGFR,EGF,KAT2B,NCSTN,NEURL1B,PLXND1,MAML2,NOTCH1
358	REACTOME_RUNX2_REGULATES_OSTEOBLAST_DIFFERENTIATION	0.0307692	0.0947786	0.557943	1.59732	19	20	ABL1,HES1,SRC,MAF,HDAC6,YES1,YAP1,WWTR1,MAPK3,SATB2,MAPK1,COL1A1,GLI3
359	REACTOME_TRANSCRIPTIONAL_REGULATION_BY_THE_AP_2_TFAP2_FAMILY_OF_TRANSCRIPTION_FACTORS	0.0217707	0.0739774	0.505849	1.59673	14	29	TFAP2A,KCTD1,CITED4,CITED2,CREBBP,CDKN1A,EP300,YY1,EGFR,VEGFA,ESR1,ERBB2,MYC,TFAP2C,TGFA
360	REACTOME_NOD1_2_SIGNALING_PATHWAY	0.0144928	0.0548071	0.489499	1.59537	9	36	TNFAIP3,IRAK1,IRAK2,BIRC3,TAB1,NOD2,CYLD,MAPK14,TAB2,MAPK13,TAB3,NOD1,RIPK2,CASP1
361	REACTOME_INTERLEUKIN_27_SIGNALING	0.0188034	0.066304	0.689807	1.59534	10	9	STAT1,CRLF1,JAK2,STAT3,JAK1
362	REACTOME_HUR_ELAVL1_BINDS_AND_STABILIZES_MRNA	0.0302013	0.0938036	0.707933	1.59423	17	8	PRKCD,TNFSF13,ELAVL1,XPO1,NUP214
363	REACTOME_PROTEIN_PROTEIN_INTERACTIONS_AT_SYNAPSES	0.0118577	0.0481178	0.453943	1.59411	8	53	SYT7,PPFIBP1,EPB41L1,SYT12,APBA3,HOMER3,CASK,PTPRF,DLGAP4,STXBP1,SIPA1L1,EPB41,LRFN3,STX1A,APBA2,PPFIA1,LRFN4,HOMER1,DLG1,APBA1,SHANK2
364	REACTOME_REGULATION_OF_GLYCOLYSIS_BY_FRUCTOSE_2_6_BISPHOSPHATE_METABOLISM	0.0203735	0.070042	0.651328	1.59393	11	11	PRKACA,PPP2R1A,PFKFB3,PPP2CB,PFKFB4
365	REACTOME_NOTCH3_INTRACELLULAR_DOMAIN_REGULATES_TRANSCRIPTION	0.0323077	0.0988173	0.556097	1.59203	20	20	STAT1,HES1,WWC1,CREBBP,EP300,NOTCH3,KAT2B,PLXND1,MAML2,NOTCH1
366	REACTOME_TRANSCRIPTIONAL_REGULATION_BY_VENTX	0.0145773	0.0548691	0.487103	1.59185	9	37	TP53,CEBPB,RELA,CCND1,MOV10,UBE2S,TNRC6B,FZR1,TCF7L2,EHMT1,EHMT2,NFKB1,TNRC6C,CDKN2A,AGO1
367	REACTOME_N_GLYCAN_TRIMMING_AND_ELONGATION_IN_THE_CIS_GOLGI	0.0216607	0.0737744	0.811278	1.58976	11	5	MGAT1,MAN1C1,MAN1A1
368	REACTOME_REGULATION_OF_IFNG_SIGNALING	0.0264026	0.0855828	0.621706	1.58769	15	13	STAT1,SOCS1,JAK2,SOCS3,JAK1,PTPN1
369	REACTOME_SIGNALING_BY_FGFR4	0.0219298	0.0742205	0.499067	1.58751	14	30	GRB2,SHC1,SRC,PPP2R1A,SPRY2,FGF1,PPP2CB,HRAS,CBL,MAPK3,KRAS,PIK3CA,MAPK1,MKNK1
370	REACTOME_GAP_JUNCTION_TRAFFICKING_AND_REGULATION	0.0144718	0.0548071	0.490089	1.58737	9	34	ACTG1,ACTB,CLTA,TUBB2A,SRC,DNM2,GJB2,TJP1,TUBB4B,TUBB6,DAB2,AP2M1,TUBA3D,CLTC,GJC1,CLTB
371	REACTOME_CHONDROITIN_SULFATE_DERMATAN_SULFATE_METABOLISM	0.0123626	0.0494902	0.469371	1.58641	8	42	AGRN,B4GALT7,CHPF,CHST11,HSPG2,CHST14,GPC6,SDC1,CSPG4,CHST7,SDC3,CHSY1,CHPF2,XYLT2,SDC4,IDUA,GPC4,GPC1,GPC2,VCAN
372	REACTOME_DAG_AND_IP3_SIGNALING	0.0144718	0.0548071	0.489623	1.58586	9	34	PRKACA,PRKCD,AHCYL1,GRK2,ADCY9,PRKX,ADCY7,ITPR1,ITPR2,CAMKK2,ITPR3,ADCY5,PRKAR1B,ADCY4
373	REACTOME_TP53_REGULATES_TRANSCRIPTION_OF_GENES_INVOLVED_IN_G1_CELL_CYCLE_ARREST	0.0336	0.100962	0.608371	1.58566	20	14	TP53,ARID3A,ZNF385A,CDKN1A,CDKN1B
374	REACTOME_TFAP2_AP_2_FAMILY_REGULATES_TRANSCRIPTION_OF_GROWTH_FACTORS_AND_THEIR_RECEPTORS	0.0285235	0.090404	0.661997	1.58497	16	10	TFAP2A,YY1,EGFR,VEGFA,ESR1,ERBB2,TFAP2C,TGFA
375	REACTOME_TRAIL_SIGNALING	0.0302013	0.0938036	0.703496	1.58424	17	8	TNFRSF10B,TNFRSF10A,CFLAR,TNFSF10,CASP10,FADD
376	REACTOME_CHROMATIN_MODIFYING_ENZYMES	0.00107527	0.0175605	0.372887	1.58255	0	234	SMARCA4,RELA,GATAD2A,ACTB,CCND1,JADE2,KMT2E,GATAD2B,TAF5L,H2BC21,USP22,SMARCC1,JAK2,TBL1X,BRD1,RCOR1,SMARCB1,KDM2A,MTA2,TADA2B,KDM3B,ATXN7L3,ARID1B,KDM5C,CARM1,KMT2C,KAT6A,KDM4B,EHMT1,CREBBP,PADI3,PADI1,PHF2,NFKB2,YEATS2,BRPF3,SAP130,EHMT2,RBBP7,NFKB1,RUVBL2,EP300,PRMT6,ARID1A,H2BC7,PADI2,NCOA1,H4C4,DNMT3A,H2BC6,TRRAP,H3C13,WDR5,SETD1A,SMARCD1,HCFC1,PHF8,KAT2B,SMARCC2,KANSL1,NCOA2,PRDM16,SETD6,PH…
377	REACTOME_NEF_MEDIATES_DOWN_MODULATION_OF_CELL_SURFACE_RECEPTORS_BY_RECRUITING_THEM_TO_CLATHRIN_ADAPTERS	0.029549	0.0926137	0.559917	1.58201	18	19	HLA-A,AP1M1,AP2A1,AP2A2,AP1B1,PACS1
378	REACTOME_APOPTOTIC_CLEAVAGE_OF_CELLULAR_PROTEINS	0.0144928	0.0548071	0.485086	1.58099	9	36	PRKCD,LMNA,CDH1,GSN,TJP2,ADD1,VIM,PLEC,BMX,DSP,TJP1,SPTAN1,STK24,PKP1,ROCK1,DSG2,CASP7,DBNL,CTNNB1,CLSPN,PRKCQ
379	REACTOME_IRS_ACTIVATION	0.018018	0.0642191	0.860419	1.58042	9	4	GRB10,IRS2,INSR,IRS1
380	REACTOME_SIGNALING_BY_ACTIVIN	0.0352	0.104153	0.606191	1.57998	21	14	INHBA,DRAP1,FSTL3,FST,SMAD3,INHBB,MAPK3,MAPK1,ACVR1C
381	REACTOME_CYCLIN_D_ASSOCIATED_EVENTS_IN_G1	0.0107672	0.0454081	0.458354	1.5797	7	47	CDKN1C,CCND1,CDKN2B,ABL1,JAK2,CCND3,SRC,CDK6,PPP2R1A,CDKN1A,PPP2R2A,CCND2,CDKN1B,PPP2CB,PTK6,LYN,CDKN2A
382	REACTOME_SIGNALING_BY_INSULIN_RECEPTOR	0.0145503	0.0548691	0.451384	1.57965	10	52	ATP6V0D1,GRB10,GRB2,IRS2,SHC1,ATP6AP1,GAB2,INSR,TRIB3,ATP6V0E2,FGF1,HRAS,IRS1,PDPK1,TCIRG1,MAPK3,ATP6V0A1,KRAS,AKT2,ATP6V0B,PIK3CA,MAPK1
383	REACTOME_NEURONAL_SYSTEM	0.00213904	0.0220897	0.371785	1.57753	1	228	PRKACA,GNB2,KCNQ1,KCNN4,KCNG1,ABAT,AP2A1,AP2A2,RPS6KA2,ACHE,PLCB3,SYT7,GNB4,TUBB2A,GNB1,GNG4,GNAI2,PPFIBP1,EPB41L1,SYT12,APBA3,SRC,KCNMA1,CACNG4,HOMER3,CASK,GRIP2,ALDH2,PTPRF,DNAJC5,DLGAP4,ADCY9,PRKX,STXBP1,CACNB1,SIPA1L1,ADCY7,EPB41,MDM2,GRIP1,GRIN3A,HRAS,LRFN3,CAMKK2,STX1A,KCNJ5,PANX2,APBA2,PDPK1,RAB3A,RPS6KA1,PPFIA1,TUBB4B,PICK1,KCNAB1,LRFN4,MAPK3,TUBB6,CHRNB2,HOMER1,ADCY5,KRAS,PRKAR1B,ADCY4,D…
384	REACTOME_RAB_GEFS_EXCHANGE_GTP_FOR_GDP_ON_RABS	0.00373134	0.0253637	0.417357	1.57592	2	85	TRAPPC1,TRAPPC9,RAB32,AKT1,RAB35,RAB6A,RAB21,RAB8B,MON1B,RAB5C,GDI1,DENND1A,RAB27B,DENND2B,RAB12,GAPVD1,RAB1B,CCZ1B,DENND1C,MADD,RAB3A,RAB13,RAB10,RAB14,RGP1,TRAPPC12,RIN1,DENND3,DENND2D,AKT2,RAB6B,SBF1,TRAPPC10
385	REACTOME_THE_ROLE_OF_NEF_IN_HIV_1_REPLICATION_AND_DISEASE_PATHOGENESIS	0.0261941	0.0854226	0.540153	1.5758	16	22	HLA-A,AP1M1,AP2A1,AP2A2,AP1B1,PACS1,FYN,PAK2
386	REACTOME_VEGFR2_MEDIATED_VASCULAR_PERMEABILITY	0.0254491	0.0835	0.521104	1.57428	16	25	JUP,VAV2,AKT1,TRIB3,VAV1,MAPKAP1,CAV1,MTOR,PAK2,PDPK1,AKT2,MLST8
387	REACTOME_EFFECTS_OF_PIP2_HYDROLYSIS	0.0341085	0.101806	0.546522	1.57422	21	21	PRKCD,ABHD12,MGLL,DAGLA,ITPR1,ITPR2,ITPR3,DGKZ,DGKQ,PRKCQ,DGKD,PRKCH,RASGRP1
388	REACTOME_TIGHT_JUNCTION_INTERACTIONS	0.0227273	0.0762784	0.534787	1.5731	14	23	CLDN4,CLDN23,CLDN7,CLDN5,CLDN3,PARD6B,PARD3,F11R,CRB3,CLDN17,PARD6A
389	REACTOME_A_TETRASACCHARIDE_LINKER_SEQUENCE_IS_REQUIRED_FOR_GAG_SYNTHESIS	0.0369231	0.10737	0.548844	1.57126	23	20	AGRN,B4GALT7,HSPG2,GPC6,SDC1,CSPG4,SDC3,XYLT2,SDC4,GPC4,GPC1,GPC2,VCAN
390	REACTOME_CASPASE_ACTIVATION_VIA_EXTRINSIC_APOPTOTIC_SIGNALLING_PATHWAY	0.0261941	0.0854226	0.538364	1.57058	16	22	TICAM1,TNFRSF10B,DAPK3,RIPK1,TNFRSF10A,CFLAR,TNFSF10,TRADD,UNC5B,FADD
391	REACTOME_MET_ACTIVATES_RAP1_AND_RAC1	0.033557	0.100962	0.655756	1.57003	19	10	GRB2,RAPGEF1,MET,CRK,CRKL
392	REACTOME_MET_ACTIVATES_RAS_SIGNALING	0.0352349	0.104153	0.65544	1.56927	20	10	GRB2,SHC1,MUC20,MET,HRAS,KRAS,RANBP9,SOS1,RANBP10
393	REACTOME_ACETYLCHOLINE_REGULATES_INSULIN_SECRETION	0.0369128	0.10737	0.654819	1.56779	21	10	PLCB3,MARCKS,GNA15,GNA11
394	REACTOME_TP53_REGULATES_TRANSCRIPTION_OF_GENES_INVOLVED_IN_G2_CELL_CYCLE_ARREST	0.0376176	0.108996	0.559443	1.566	23	18	GADD45A,TP53,ZNF385A,CARM1,EP300,BAX
395	REACTOME_VLDLR_INTERNALISATION_AND_DEGRADATION	0.020202	0.06984	0.628407	1.5658	11	12	AP2A1,AP2A2,CLTA,VLDLR,NR1H2,AP2M1,CLTC,AP2S1
396	REACTOME_TIE2_SIGNALING	0.0264026	0.0855828	0.613131	1.56579	15	13	GRB2,SHC1,HRAS,ANGPT2,KRAS,GRB7,PIK3CA
397	REACTOME_RHO_GTPASES_ACTIVATE_NADPH_OXIDASES	0.0369231	0.10737	0.545586	1.56194	23	20	PRKCD,NCF1,PRKCZ,MAPK14,RAC2,MAPK3,MAPK1,NCF4,NOXA1
398	REACTOME_SMOOTH_MUSCLE_CONTRACTION	0.020438	0.070042	0.488271	1.56054	13	31	MYL9,TLN1,TPM1,ITGB5,SORBS3,TPM4,CALD1,PXN,ITGA1,PAK2,ANXA1,ACTA2,DYSF
399	REACTOME_GAP_JUNCTION_DEGRADATION	0.020202	0.06984	0.626235	1.56038	11	12	ACTG1,ACTB,CLTA,DNM2,DAB2,AP2M1,CLTC,CLTB
400	REACTOME_REGULATED_NECROSIS	0.0171958	0.0626995	0.445151	1.55784	12	52	TP53,IRF1,MLKL,TNFRSF10B,BIRC3,RIPK1,IL1A,TNFRSF10A,CFLAR,TNFSF10,CHMP4B,TRADD,BAK1,IRF2,CHMP7,BAX,IL1B,FADD,CASP1,IL18,GSDMD,XIAP,STUB1
401	REACTOME_REGULATION_OF_BETA_CELL_DEVELOPMENT	0.0387597	0.111107	0.540741	1.55757	24	21	FOXA2,HES1,AKT1,CREBBP,EP300,KAT2B,MAML2,NOTCH1,AKT2
402	REACTOME_SIGNALING_BY_WNT_IN_CANCER	0.0292398	0.0918231	0.489471	1.55699	19	30	FZD5,TCF7L2,AXIN1,PPP2R1A,PORCN,CTBP2,PPP2CB,CTBP1,KREMEN1,PPP2R5B,PPP2R5A,LRP5,FZD8,CSNK1A1,AMER1,TNKS2,PPP2R5D,CTNNB1,DKK1,PPP2R5E
403	REACTOME_DISEASES_OF_PROGRAMMED_CELL_DEATH	0.00755667	0.0359109	0.41974	1.55585	5	74	JUN,TP53,CAPN1,LMNA,H2BC21,RIPK1,APP,SOD2,TRADD,CAPNS1,RBBP7,FOXO3,DNMT1,H2BC7,H4C4,DNMT3A,H2BC6,CAPN2,H3C13,CDKN2A
404	REACTOME_STAT5_ACTIVATION	0.0252708	0.0830841	0.793856	1.55562	13	5	GRB2,STAT5A,GAB2,STAT5B
405	REACTOME_TGF_BETA_RECEPTOR_SIGNALING_IN_EMT_EPITHELIAL_TO_MESENCHYMAL_TRANSITION	0.0423197	0.119752	0.571801	1.55558	26	16	ARHGEF18,PRKCZ,SMURF1,PARD3,CGN,TGFB1,F11R,TGFBR2
406	REACTOME_SMAD2_SMAD3_SMAD4_HETEROTRIMER_REGULATES_TRANSCRIPTION	0.0234949	0.0783179	0.484318	1.55558	15	32	JUNB,SERPINE1,CDKN2B,CCNK,SMAD3,CDK9,TGIF2,TGIF1,SP1,WWTR1,MAPK3,MYC,RNF111
407	REACTOME_RAB_REGULATION_OF_TRAFFICKING	0.00593824	0.0317326	0.396017	1.55431	4	114	OPTN,RAB11B,TRAPPC1,TRAPPC9,RAB32,AKT1,RAB35,RAB6A,TBC1D10B,RAB21,TBC1D16,RAB8B,MON1B,RAB5C,ARF6,GDI1,DENND1A,TBC1D10A,RAB27B,DENND2B,RAB12,GAPVD1,RAB1B,CCZ1B,DENND1C,TBC1D13,MADD,RAB3A,RAB13,RAB10,RAB14,RGP1,TRAPPC12,RIN1,DENND3,DENND2D,AKT2,TBC1D24,RAB6B,SBF1,TRAPPC10
408	REACTOME_CD163_MEDIATING_AN_ANTI_INFLAMMATORY_RESPONSE	0.0341297	0.101806	0.713448	1.55424	19	7	MYH9,RHBDF2,FURIN,MAPK14
409	REACTOME_RUNX2_REGULATES_GENES_INVOLVED_IN_CELL_MIGRATION	0.0358362	0.104967	0.713302	1.55393	20	7	MMP13,ITGA5,AKT1,AKT2,AKT3,RUNX2,CBFB
410	REACTOME_KILLING_MECHANISMS	0.0271647	0.0872892	0.634928	1.5538	15	11	JUN,DVL2,DVL3,DVL1,FZD7,NOXA1
411	REACTOME_ACTIVATED_TAK1_MEDIATES_P38_MAPK_ACTIVATION	0.0272727	0.0873486	0.528218	1.55377	17	23	MAP2K3,IRAK1,IRAK2,MAPKAPK2,TAB1,NOD2,MAPK14,TAB2,TAB3,NOD1,RIPK2
412	REACTOME_RMTS_METHYLATE_HISTONE_ARGININES	0.0186916	0.0661805	0.446244	1.5536	13	51	SMARCA4,CCND1,SMARCC1,JAK2,SMARCB1,ARID1B,CARM1,RBBP7,PRMT6,ARID1A,H4C4,DNMT3A,H3C13,WDR5,SMARCD1,SMARCC2,H3C6,PBRM1,PRMT7
413	REACTOME_CHONDROITIN_SULFATE_BIOSYNTHESIS	0.04	0.114053	0.596036	1.55351	24	14	CHPF,CHST11,CSPG4,CHST7,CHSY1,CHPF2
414	REACTOME_RUNX1_REGULATES_GENES_INVOLVED_IN_MEGAKARYOCYTE_DIFFERENTIATION_AND_PLATELET_FUNCTION	0.0116129	0.0472434	0.427924	1.55338	8	65	MYL9,KMT2E,THBS1,H2BC21,MOV10,TNRC6B,KMT2C,EP300,PRMT6,H2BC7,H4C4,H2BC6,H3C13,WDR5,SETD1A,TNRC6C,KAT2B,RUNX1,AGO1,KMT2A,H3C6,SETD1B,ZFPM1,SIN3B,TNRC6A
415	REACTOME_SYNTHESIS_OF_PIPS_AT_THE_PLASMA_MEMBRANE	0.0176152	0.0636005	0.449713	1.55276	12	49	PLEKHA4,PLEKHA2,MTMR1,INPP5K,INPP5D,PIP5K1C,BMX,PI4K2A,PI4K2B,SYNJ2,PIP4K2B,PIP5K1A,RAB14,PLEKHA6,PIP4K2C,MTMR14,INPP4A,SYNJ1,PIP4K2A,PIK3CA,PLEKHA3,PIK3C2B,ARF1,PIP5K1B
416	REACTOME_RAS_SIGNALING_DOWNSTREAM_OF_NF1_LOSS_OF_FUNCTION_VARIANTS	0.0358362	0.104967	0.712634	1.55247	20	7	SPRED1,SPRED3,HRAS,SPRED2,KRAS
417	REACTOME_CELLULAR_HEXOSE_TRANSPORT	0.029703	0.0929155	0.607702	1.55192	17	13	SLC5A1,SLC2A6,SLC2A12,SLC2A10,SLC2A1,SLC50A1,SLC2A11,MFSD4B,SLC2A8,SLC45A3
418	REACTOME_DNA_DAMAGE_TELOMERE_STRESS_INDUCED_SENESCENCE	0.0169271	0.062304	0.433769	1.55162	12	58	TP53,H1-0,HMGA1,H2BC21,NBN,H1-4,HIRA,UBN1,CDKN1A,TERF1,CDKN1B,H2BC7,HMGA2,H4C4,H2BC6,TERF2IP
419	REACTOME_NERVOUS_SYSTEM_DEVELOPMENT	0.00101833	0.0175605	0.35133	1.55023	0	480	SEMA7A,MMP9,PRKACA,NTN1,RHOB,COL4A2,NCK2,MMP2,EGR2,ACTG1,SMARCA4,MYH14,MYL9,ACTB,AGRN,MYH9,EIF4G1,TLN1,AP2A1,AP2A2,MYO10,RNPS1,PAK4,MAP2K2,RPS6KA2,CLTA,GRB10,CSNK2A2,ABL1,GRB2,RAP1GAP,IRS2,ITGA5,RPS6KA4,SH3KBP1,DAG1,EPHB4,APH1A,TUBB2A,EPHB2,EPHA2,RND1,PSMA6,SHC1,WASL,SRC,RASA1,TRIO,ARTN,SREBF2,PLXNA1,VAV2,PSMD3,CASC3,RRAS,DOCK1,NRP1,GAB2,DNM2,LIMK1,PSMB9,PLXNA2,PABPC1,PIP5K1C,SRGAP1,PDLIM7,ARHGAP…
420	REACTOME_SOS_MEDIATED_SIGNALLING	0.0392491	0.112111	0.711252	1.54946	22	7	GRB2,IRS2,HRAS,IRS1,KRAS
421	REACTOME_CLEC7A_DECTIN_1_INDUCES_NFAT_ACTIVATION	0.0305603	0.0943382	0.63289	1.54881	17	11	NFATC1,AHCYL1,ITPR1,ITPR2,PPP3R1,ITPR3,NFATC2,PPP3CA
422	REACTOME_KERATAN_SULFATE_KERATIN_METABOLISM	0.0324484	0.0988173	0.498032	1.54787	21	28	B4GALT5,ST3GAL1,SLC35D2,B3GNT7,B4GALT2,B3GNT3,ST3GAL4,CHST2,GLB1L,GNS,CHST6,ST3GAL3,B4GALT3,B4GALT1
423	REACTOME_RUNX2_REGULATES_BONE_DEVELOPMENT	0.0311111	0.0956489	0.503836	1.54642	20	26	ABL1,HES1,SRC,MAF,HDAC6,YES1,YAP1,WWTR1,MAPK3,SATB2,MAPK1,COL1A1,RBM14,HDAC4,GLI3
424	REACTOME_EPHA_MEDIATED_GROWTH_CONE_COLLAPSE	0.030303	0.0938811	0.525584	1.54602	19	23	MYH14,MYL9,MYH9,EPHA2,SRC,FYN,YES1,LYN,EFNA5,EPHA10,MYH10,ROCK1
425	REACTOME_NUCLEAR_SIGNALING_BY_ERBB4	0.0339233	0.101581	0.496841	1.54417	22	28	SPARC,EREG,APH1A,STAT5A,SRC,NRG2,TAB2,ADAP1,YAP1,NCSTN,ESR1
426	REACTOME_SIGNALING_BY_ERBB2_IN_CANCER	0.0299401	0.0934758	0.510647	1.54269	19	25	GRB2,EREG,SHC1,NRG2,PTPN12,EGFR,HRAS,EGF,ERBB2,KRAS,PIK3CA,ERBIN,BTC,HBEGF
427	REACTOME_INFECTIOUS_DISEASE	0.00100402	0.0175605	0.344838	1.54224	0	694	JUN,ISG15,EIF2AK2,PML,MVB12A,RNF213,PARP14,PRKACA,GNB2,STAT2,TRIM28,PARP10,ACTG1,LTF,MYO1C,PARP9,HLA-A,RELA,GATAD2A,DVL2,GTF2F1,HSPA1A,ACTB,MYH9,EEF2,AP1M1,AP2A1,AP2A2,MYO10,KEAP1,ZBP1,RHBDF2,MAP2K2,MGAT4B,VPS37B,MAP2K3,CLTA,ADRB1,CDH1,ABL1,VPS37C,GRB2,PRKCSH,MGAT1,SH3KBP1,AP1B1,CTDP1,GNB4,DYNC1H1,SH3GL1,TUBB2A,HMGA1,GATAD2B,GNB1,H2BC21,GNG4,GNAI2,PSMA6,ST3GAL1,ANTXR2,JAK2,WASL,POLR2A,TBL1X,KPNB1…
428	REACTOME_NEUROTRANSMITTER_RECEPTORS_AND_POSTSYNAPTIC_SIGNAL_TRANSMISSION	0.007109	0.0343922	0.390504	1.54171	5	120	PRKACA,GNB2,AP2A1,AP2A2,RPS6KA2,PLCB3,GNB4,TUBB2A,GNB1,GNG4,GNAI2,EPB41L1,SRC,CACNG4,CASK,GRIP2,ADCY9,PRKX,ADCY7,MDM2,GRIP1,GRIN3A,HRAS,CAMKK2,KCNJ5,PDPK1,RPS6KA1,TUBB4B,PICK1,MAPK3,TUBB6,CHRNB2,ADCY5,KRAS,PRKAR1B,ADCY4,DLG1,GLRA2,APBA1,PPM1F,RPS6KA3,RASGRF1,AP2M1,MAPK1,TUBA3D
429	REACTOME_SHC_RELATED_EVENTS_TRIGGERED_BY_IGF1R	0.0443686	0.124008	0.70746	1.5412	25	7	GRB2,SHC1,HRAS,IGF1R,KRAS
430	REACTOME_RHO_GTPASES_ACTIVATE_PAKS	0.0430769	0.121298	0.538158	1.54067	27	20	FLNA,MYH14,MYL9,MYH9,LIMK1,CTTN,PAK2,MYH10,NF2
431	REACTOME_RHO_GTPASES_ACTIVATE_CIT	0.0423197	0.119752	0.550223	1.54019	26	18	RHOB,MYH14,MYL9,MYH9,CDKN1B,RHOC,MYH10
432	REACTOME_SIGNALING_BY_FGFR3	0.0233577	0.0780689	0.481459	1.53877	15	31	GRB2,SHC1,SRC,PPP2R1A,SPRY2,FGF1,PPP2CB,HRAS,CBL,MAPK3,KRAS,PIK3CA,MAPK1,MKNK1
433	REACTOME_ION_HOMEOSTASIS	0.0233577	0.0780689	0.481094	1.5376	15	31	PRKACA,STIM1,ORAI1,AHCYL1,RYR1,FXYD3,ITPR1,ITPR2,ATP2A2,ITPR3
434	REACTOME_THE_ACTIVATION_OF_ARYLSULFATASES	0.045302	0.124809	0.640237	1.53288	26	10	ARSJ,STS,ARSA,ARSI,SUMF2,ARSD
435	REACTOME_TNFS_BIND_THEIR_PHYSIOLOGICAL_RECEPTORS	0.0448	0.124008	0.574927	1.53223	27	15	TNFSF13B,TNFSF13,TNFRSF1A,TNFSF9
436	REACTOME_SIGNALING_BY_THE_B_CELL_RECEPTOR_BCR	0.00960384	0.04173	0.394514	1.53022	7	101	CARD11,RELA,STIM1,NFKBIE,ORAI1,GRB2,SH3KBP1,NFATC1,PSMA6,RASGRP3,PIK3AP1,NFKBIA,PSMD3,PSMB9,AHCYL1,PSMB10,VAV1,NFKB1,NFKBIB,FYN,BCL10,PSMF1,ITPR1,HRAS,ITPR2,PPP3R1,ITPR3,PSMB8,LYN,PSME3,NFATC2,PSME2,MALT1,PPP3CA
437	REACTOME_PHASE_2_PLATEAU_PHASE	0.0486577	0.131302	0.63852	1.52877	28	10	KCNQ1,CACNG4,CACNG6,CACNB1
438	REACTOME_REGULATION_OF_TP53_ACTIVITY_THROUGH_ASSOCIATION_WITH_CO_FACTORS	0.0286195	0.090404	0.613419	1.52845	16	12	TP53,ZNF385A,AKT1,PPP1R13L,PHF20,AKT2,BANP,AKT3,TP73
439	REACTOME_PROLONGED_ERK_ACTIVATION_EVENTS	0.0286195	0.090404	0.613345	1.52827	16	12	MAP2K2,RAPGEF1,CRK,MAPK3,MAPK1,MAP2K1,CRKL
440	REACTOME_INTERLEUKIN_6_SIGNALING	0.0424448	0.119752	0.623972	1.52699	24	11	STAT1,JAK2,STAT3,SOCS3,JAK1,CBL
441	REACTOME_RETROGRADE_NEUROTROPHIN_SIGNALLING	0.0424448	0.119752	0.623815	1.5266	24	11	AP2A1,AP2A2,CLTA,DNM2,AP2M1,CLTC,DNM3,AP2S1
442	REACTOME_SIGNALING_BY_TYPE_1_INSULIN_LIKE_GROWTH_FACTOR_1_RECEPTOR_IGF1R	0.0262774	0.0855209	0.477123	1.52491	17	31	GRB2,IRS2,SHC1,GAB2,TRIB3,FGF1,HRAS,IRS1,PDPK1,IGF1R,KRAS,AKT2,PIK3CA
443	REACTOME_PURINERGIC_SIGNALING_IN_LEISHMANIASIS_INFECTION	0.0446154	0.124008	0.530792	1.51958	28	20	RELA,HMOX1,IL1A,APP,NFKB2,NFKB1,PYCARD,IL1B,C3,CASP1,NT5E,IL18,GSDMD,ENTPD5,TXNIP
444	REACTOME_BETA_CATENIN_INDEPENDENT_WNT_SIGNALING	0.00821596	0.0382541	0.381171	1.51727	6	126	GNB2,DVL2,AP2A1,AP2A2,CLTA,PLCB3,GNB4,NFATC1,GNB1,GNG4,FZD5,PSMA6,MOV10,FZD1,SMURF1,PSMD3,TNRC6B,TCF7L1,PSMB9,TCF7L2,SCRIB,PSMB10,AGO2,PSMF1,ITPR1,RAC2,ITPR2,DVL3,PPP3R1,ITPR3,PSMB8,DVL1,PSME3,WNT5B,TNRC6C,AGO1,PSME2,PPP3CA,MYC,RAC3,ARRB2,KRAS,SMURF2,FZD8,PARD6A,TNRC6A,FZD7,AP2M1
445	REACTOME_HEPARAN_SULFATE_HEPARIN_HS_GAG_METABOLISM	0.0290859	0.0915182	0.45178	1.51077	20	40	AGRN,B4GALT7,EXT1,HS3ST1,HSPG2,SLC35D2,NDST1,NAGLU,GPC6,SDC1,CSPG4,SDC3,GLB1L,HPSE,GUSB,XYLT2,SDC4,IDUA,HGSNAT,HS6ST1,GPC4,GPC1,GPC2,VCAN
446	REACTOME_BH3_ONLY_PROTEINS_ASSOCIATE_WITH_AND_INACTIVATE_ANTI_APOPTOTIC_BCL_2_MEMBERS	0.0495727	0.132547	0.652992	1.5102	28	9	BBC3,PMAIP1,STAT3,BCL2L1,BID,BCL2
447	REACTOME_SIGNALING_BY_ERBB4	0.0271003	0.0872892	0.436779	1.5081	19	49	SPARC,GRB2,EREG,APH1A,SHC1,STAT5A,SRC,NRG2,TAB2,EGFR,WWP1,HRAS,EGF,ADAP1,YAP1,NCSTN,ESR1
448	REACTOME_PROGRAMMED_CELL_DEATH	0.00548847	0.030842	0.360678	1.50662	4	194	BBC3,TP53,TICAM1,IRF1,H1-0,PRKCD,LMNA,MLKL,CDH1,TNFRSF10B,PSMA6,GSN,BIRC3,KPNB1,H1-4,TJP2,ADD1,PMAIP1,DAPK3,RIPK1,IL1A,TNFRSF10A,AKT1,STAT3,PSMD3,CFLAR,VIM,PSMB9,YWHAG,TNFSF10,PLEC,CHMP4B,TRADD,PSMB10,APAF1,BAK1,BMX,DSP,PSMF1,DYNLL2,TJP1,PPP3R1,IRF2,PAK2,PSMB8,BCL2L1,CHMP7,PSME3,CDKN2A,PSME2,BAX,UNC5B,IL1B,SPTAN1,MAPK3,STK24,FADD,CASP1,DFFB,PKP1,AKT2,ROCK1,YWHAH,BID,NMT1,BCL2,IL18,MAPK1,GSDMD,AVEN
449	REACTOME_TRANS_GOLGI_NETWORK_VESICLE_BUDDING	0.0243902	0.0810158	0.40999	1.5066	18	69	AP1M1,BLOC1S3,FTH1,IGF2R,CLTA,AP1B1,BLOC1S4,CTSZ,NAPA,STX4,HIP1R,GBF1,DNM2,APP,RAB5C,GAK,SNX9,SORT1,SNAP23,ARRB1,PICALM,AP4E1,GNS,ARF1,TFRC,CLTC,CPD,SH3D19
450	REACTOME_RSK_ACTIVATION	0.059727	0.152455	0.689911	1.50297	34	7	RPS6KA2,PDPK1,RPS6KA1,MAPK3,RPS6KA3,MAPK1
451	REACTOME_SYNTHESIS_OF_ACTIVE_UBIQUITIN_ROLES_OF_E1_AND_E2_ENZYMES	0.0453216	0.124809	0.472253	1.50222	30	30	UBE2D2,UBA1,UBE2Z,UBE2S,CDC34,UBE2R2,UBE2H,USP5,UBE2E3,UBE2A,USP7
452	REACTOME_DAP12_SIGNALING	0.0496124	0.132547	0.521402	1.50187	31	21	GRB2,SHC1,VAV2,HLA-E,FYN,HRAS,KRAS,PIK3CA
453	REACTOME_RIPK1_MEDIATED_REGULATED_NECROSIS	0.0471976	0.128438	0.483168	1.50168	31	28	MLKL,TNFRSF10B,BIRC3,RIPK1,TNFRSF10A,CFLAR,TNFSF10,TRADD
454	REACTOME_PLATELET_CALCIUM_HOMEOSTASIS	0.0517241	0.137052	0.551809	1.5012	32	16	STIM1,ORAI1,ITPR1,ITPR2,ATP2A2,ITPR3
455	REACTOME_EPHRIN_SIGNALING	0.0522152	0.138126	0.541419	1.49814	32	17	NCK2,EPHB4,EPHB2,SRC,FYN,PAK2,EPHB3,EFNB1,ARHGEF7,EFNB2
456	REACTOME_TFAP2_AP_2_FAMILY_REGULATES_TRANSCRIPTION_OF_CELL_CYCLE_FACTORS	0.0433213	0.121586	0.763767	1.49666	23	5	TFAP2A,CDKN1A,MYC,TFAP2C
457	REACTOME_SENESCENCE_ASSOCIATED_SECRETORY_PHENOTYPE_SASP	0.0227273	0.0762784	0.398647	1.49471	17	83	JUN,CEBPB,FOS,RELA,CDKN2B,RPS6KA2,H2BC21,IL1A,UBE2S,CDK6,STAT3,FZR1,EHMT1,CDKN1A,EHMT2,NFKB1,CDKN1B,H2BC7,H4C4,H2BC6,H3C13,CDKN2A,RPS6KA1
458	REACTOME_SIGNALING_BY_MEMBRANE_TETHERED_FUSIONS_OF_PDGFRA_OR_PDGFRB	0.0324324	0.0988173	0.812753	1.49287	17	4	KANK1,KDR,ETV6,GOLGA4
459	REACTOME_NF_KB_IS_ACTIVATED_AND_SIGNALS_SURVIVAL	0.0319865	0.098153	0.598532	1.49136	18	12	RELA,IRAK1,NFKBIA,NFKB1,SQSTM1,NGFR
460	REACTOME_METABOLISM_OF_CARBOHYDRATES	0.00645161	0.0326841	0.349414	1.48926	5	247	HK2,PRKACA,G6PD,AGRN,B4GALT5,B4GALT7,PCK2,EXT1,PFKP,SLC9A1,ST3GAL1,SLC25A1,GYS1,HK1,CHPF,SLC25A11,HS3ST1,TKT,MAN2B1,CHST11,HSPG2,MAN2B2,POM121C,SLC35D2,NDST1,NAGLU,B3GNT7,G6PC3,CHP1,PKM,PPP2R1A,CHST14,PC,B4GALT2,TKFC,PHKA1,PFKFB3,GPC6,SLC37A1,SDC1,CSPG4,NHLRC1,GAA,B3GNT3,PPP2CB,ST3GAL4,CHST2,PGLS,RHCE,HAS2,PHKG1,PFKFB4,CHST7,SLC35B2,SDC3,PYGB,GLYCTK,PFKL,NUP188,GLB1L,FUT3,HPSE,FUT1,SLC2A1,NUP62,F…
461	REACTOME_PHOSPHOLIPID_METABOLISM	0.00767544	0.036368	0.357558	1.48778	6	182	AGPAT2,MBOAT7,LPIN1,PLA2G4C,ACHE,CSNK2A2,TNFAIP8L1,ARF3,CPNE7,PLEKHA4,PLEKHA2,MTMR1,OSBPL10,INPP5K,ETNK2,MGLL,OSBPL5,PLD3,CDIPT,PNPLA6,PCYT2,AGPAT3,INPP5D,PIP5K1C,PTDSS2,MBOAT2,PI4KA,PITPNM1,BMX,PLD2,PI4K2A,PLA2G4E,PI4K2B,LPCAT1,DDHD2,SYNJ2,PNPLA3,PITPNM2,PIP4K2B,LPCAT4,PIP5K1A,LIPH,PLD6,RAB14,PLEKHA6,PIP4K2C,MTMR14,ABHD3,GDPD3,PLAAT2,VAC14,INPP4A,LPIN2,SYNJ1,PIP4K2A,GPAT3,SBF1,GDPD5,PIK3CA,PLEKH…
462	REACTOME_FORMYL_PEPTIDE_RECEPTORS_BIND_FORMYL_PEPTIDES_AND_MANY_OTHER_LIGANDS	0.036036	0.105361	0.809855	1.48754	19	4	APP,ANXA1,HEBP1
463	REACTOME_SIGNALING_BY_EGFR_IN_CANCER	0.0449102	0.1241	0.492341	1.48739	29	25	GRB2,EREG,SHC1,EGFR,EPGN,HRAS,EGF,CBL,KRAS,PIK3CA,AREG,TGFA,BTC,HBEGF
464	REACTOME_METAL_SEQUESTRATION_BY_ANTIMICROBIAL_PROTEINS	0.0469314	0.12793	0.758969	1.48726	25	5	LTF,S100A9
465	REACTOME_NR1H2_NR1H3_REGULATE_GENE_EXPRESSION_LINKED_TO_LIPOGENESIS	0.0620805	0.156513	0.659802	1.48584	36	8	FASN,SREBF1,RXRA,NR1H2,NRIP1,RXRB
466	REACTOME_REGULATION_OF_SIGNALING_BY_CBL	0.0569231	0.14696	0.518912	1.48557	36	20	GRB2,RAPGEF1,VAV1,FYN,YES1,CRK,LYN,CBL,PIK3CA,CRKL,PIK3CD
467	REACTOME_REGULATION_OF_FOXO_TRANSCRIPTIONAL_ACTIVITY_BY_ACETYLATION	0.0620805	0.156513	0.62006	1.48457	36	10	CREBBP,EP300,FOXO3,KAT2B,SIRT1,TXNIP,FOXO4
468	REACTOME_DEUBIQUITINATION	0.00645161	0.0326841	0.347785	1.48264	5	252	IFIH1,DDX58,TRIM25,USP18,TNFAIP3,TNIP1,TP53,RAD23A,ACTB,OTUD5,KEAP1,USP42,USP11,H2BC21,PSMA6,USP22,BIRC3,TRAF3,NFKBIA,RIPK1,TADA2B,PSMD3,PSMB9,AXIN1,SNX3,USP5,FKBP8,RCE1,TNIP3,TAB1,USP25,NOD2,PSMB10,RHOT1,TGFB1,SMAD3,OTUD7B,EP300,FOXK2,CYLD,YY1,H2BC7,TNIP2,MDM2,PSMF1,JOSD1,MAVS,ADRB2,FOXK1,H2BC6,TRRAP,ASXL2,GATA3,USP7,USP33,PSMB8,NOD1,HCFC1,USP2,TGFBR2,PSME3,USP20,KAT2B,VCPIP1,PSME2,USP19,ESR1,RI…
469	REACTOME_CONSTITUTIVE_SIGNALING_BY_OVEREXPRESSED_ERBB2	0.057725	0.148554	0.60558	1.48198	33	11	GRB2,SHC1,PTPN12,HRAS,ERBB2,KRAS,ERBIN
470	REACTOME_ERKS_ARE_INACTIVATED	0.0445545	0.124008	0.580043	1.48129	26	13	PPP2R1A,DUSP4,DUSP6,PPP2CB,MAPK3,DUSP3,MAPK1,DUSP7,PPP2R5D
471	REACTOME_ANCHORING_FIBRIL_FORMATION	0.0496	0.132547	0.567986	1.4804	30	14	COL4A2,LAMC2,LAMA3,LAMB3,BMP1
472	REACTOME_TLR3_MEDIATED_TICAM1_DEPENDENT_PROGRAMMED_CELL_DEATH	0.0615942	0.156019	0.724737	1.48013	33	6	TICAM1,RIPK1,TLR3,FADD,RIPK3
473	REACTOME_TICAM1_DEPENDENT_ACTIVATION_OF_IRF3_IRF7	0.0387205	0.111107	0.594012	1.48009	22	12	IRF7,TICAM1,TRAF3,TLR3,IRF3
474	REACTOME_KERATAN_SULFATE_BIOSYNTHESIS	0.0431433	0.121298	0.507232	1.47976	27	22	B4GALT5,ST3GAL1,SLC35D2,B3GNT7,B4GALT2,B3GNT3,ST3GAL4,CHST2,CHST6,ST3GAL3,B4GALT3,B4GALT1
475	REACTOME_SUMOYLATION_OF_INTRACELLULAR_RECEPTORS	0.0488889	0.131706	0.481652	1.47833	32	26	RARA,PIAS4,VDR,RXRA,NR3C1,ESR1,NR1H2,PPARA,THRA,SUMO3,PIAS3,HDAC4,UBE2I,NR3C2,PIAS2
476	REACTOME_BINDING_AND_UPTAKE_OF_LIGANDS_BY_SCAVENGER_RECEPTORS	0.0446841	0.124008	0.506167	1.47665	28	22	COL4A2,SPARC,FTH1,SCARB1,APOL1
477	REACTOME_NEUREXINS_AND_NEUROLIGINS	0.0347826	0.103385	0.453031	1.47651	23	36	SYT7,EPB41L1,SYT12,APBA3,HOMER3,CASK,DLGAP4,STXBP1,SIPA1L1,EPB41,STX1A,APBA2,HOMER1,APBA1,SHANK2
478	REACTOME_CD28_DEPENDENT_VAV1_PATHWAY	0.0666667	0.164207	0.637905	1.47531	38	9	GRB2,VAV1,FYN,PAK2,CD86
479	REACTOME_TRANSMISSION_ACROSS_CHEMICAL_SYNAPSES	0.00912201	0.0407079	0.360197	1.47437	7	158	PRKACA,GNB2,ABAT,AP2A1,AP2A2,RPS6KA2,ACHE,PLCB3,GNB4,TUBB2A,GNB1,GNG4,GNAI2,EPB41L1,SRC,CACNG4,CASK,GRIP2,ALDH2,DNAJC5,ADCY9,PRKX,STXBP1,CACNB1,ADCY7,MDM2,GRIP1,GRIN3A,HRAS,CAMKK2,STX1A,KCNJ5,PDPK1,RAB3A,RPS6KA1,PPFIA1,TUBB4B,PICK1,MAPK3,TUBB6,CHRNB2,ADCY5,KRAS,PRKAR1B,ADCY4,DLG1,GLRA2,APBA1,PPM1F,RPS6KA3,RASGRF1,AP2M1,MAPK1,TUBA3D,GLS
480	REACTOME_NEF_MEDIATED_DOWNREGULATION_OF_MHC_CLASS_I_COMPLEX_CELL_SURFACE_EXPRESSION	0.0637584	0.159743	0.615615	1.47392	37	10	HLA-A,AP1M1,AP1B1,PACS1
481	REACTOME_TICAM1_TRAF6_DEPENDENT_INDUCTION_OF_TAK1_COMPLEX	0.0611205	0.155308	0.601917	1.47302	35	11	TICAM1,TAB1,TLR3,TAB2,TAB3
482	REACTOME_RUNX1_REGULATES_EXPRESSION_OF_COMPONENTS_OF_TIGHT_JUNCTIONS	0.0559567	0.145333	0.750519	1.4707	30	5	CLDN5,TJP1,RUNX1,CBFB,OCLN
483	REACTOME_NECTIN_NECL_TRANS_HETERODIMERIZATION	0.067029	0.164359	0.719636	1.46971	36	6	NECTIN2,PVR,NECTIN4,NECTIN1,NECTIN3,CADM1
484	REACTOME_LOSS_OF_MECP2_BINDING_ABILITY_TO_THE_NCOR_SMRT_COMPLEX	0.067029	0.164359	0.71936	1.46915	36	6	TBL1X,MECP2,NCOR2
485	REACTOME_INTERACTION_BETWEEN_L1_AND_ANKYRINS	0.0579937	0.149008	0.524663	1.46864	36	18	ACTG1,ACTB,SPTBN1,ANK1,SPTBN5,SPTAN1,SPTBN2,NRCAM,SCN4B
486	REACTOME_BASIGIN_INTERACTIONS	0.0615385	0.156019	0.512582	1.46745	39	20	SLC7A11,ITGA3,MMP1,SLC16A3,BSG,CAV1,SLC3A2,SLC7A5,ATP1B1,ITGA6
487	REACTOME_CA2_ACTIVATED_K_CHANNELS	0.0706522	0.169376	0.718302	1.46699	38	6	KCNN4,KCNMA1,KCNN3
488	REACTOME_INTERLEUKIN_35_SIGNALLING	0.0679117	0.165673	0.598219	1.46397	39	11	STAT1,JAK2,STAT3,JAK1,IL27RA,TYK2,STAT4
489	REACTOME_INTERLEUKIN_36_PATHWAY	0.0649819	0.162053	0.746476	1.46278	35	5	IL36RN,IL36G,IL36A
490	REACTOME_ACYL_CHAIN_REMODELING_OF_DAG_AND_TAG	0.0649819	0.162053	0.746081	1.462	35	5	MGLL,PNPLA3,DGAT2
491	REACTOME_TRANSCRIPTIONAL_REGULATION_BY_RUNX3	0.0328068	0.0997203	0.380091	1.46149	26	94	TP53,CCN2,CCND1,HES1,PSMA6,SRC,JAG1,SMURF1,ZFHX3,PSMD3,TCF7L1,PSMB9,TCF7L2,CREBBP,PSMB10,CDKN1A,TGFB1,SMAD3,EP300,FOXO3,MDM2,PSMF1,BRD2,PSMB8,PSME3,CDKN2A,KAT2B,RUNX1,YAP1,PSME2,WWTR1,MYC,MAML2,KRAS,NOTCH1,SMURF2
492	REACTOME_HSF1_DEPENDENT_TRANSACTIVATION	0.0493469	0.132496	0.45361	1.4614	33	33	HSPA6,HSPA1A,DEDD2,AKT1S1,HSPA1B,TNFRSF21,HSF1,DNAJB1,CREBBP,EP300,MTOR,RPTOR,HSPA2
493	REACTOME_SUMOYLATION_OF_DNA_METHYLATION_PROTEINS	0.0658307	0.16341	0.537174	1.46138	41	16	CBX4,PHC2,DNMT1,RING1,DNMT3A,CBX8,PCGF2,CBX2,UBE2I,SCMH1
494	REACTOME_RAF_ACTIVATION	0.0484581	0.130983	0.454985	1.46137	32	32	MAP2K2,ARAF,BRAP,JAK2,SRC,MAP3K11,PPP2R1A,PPP2CB,HRAS,PPP2R5B,PPP2R5A,KRAS
495	REACTOME_SYNTHESIS_OF_15_EICOSATETRAENOIC_ACID_DERIVATIVES	0.0706522	0.169376	0.714843	1.45992	38	6	PTGS2,ALOX15,GPX4
496	REACTOME_APOPTOSIS	0.0110865	0.0461507	0.353725	1.45945	9	167	BBC3,TP53,TICAM1,H1-0,PRKCD,LMNA,CDH1,TNFRSF10B,PSMA6,GSN,KPNB1,H1-4,TJP2,ADD1,PMAIP1,DAPK3,RIPK1,TNFRSF10A,AKT1,STAT3,PSMD3,CFLAR,VIM,PSMB9,YWHAG,TNFSF10,PLEC,TRADD,PSMB10,APAF1,BAK1,BMX,DSP,PSMF1,DYNLL2,TJP1,PPP3R1,PAK2,PSMB8,BCL2L1,PSME3,CDKN2A,PSME2,BAX,UNC5B,SPTAN1,MAPK3,STK24,FADD,DFFB,PKP1,AKT2,ROCK1,YWHAH,BID,NMT1,BCL2,MAPK1,GSDMD,AVEN,XIAP
497	REACTOME_NR1H2_NR1H3_REGULATE_GENE_EXPRESSION_TO_CONTROL_BILE_ACID_HOMEOSTASIS	0.0738255	0.174223	0.647919	1.45908	43	8	RXRA,NCOA1,NR1H2,NCOR2,RXRB,FABP6
498	REACTOME_VESICLE_MEDIATED_TRANSPORT	0.00101317	0.0175605	0.32781	1.45884	0	585	MVB12A,TOR1B,CAPZB,COL4A2,SPARC,ACTG1,MYO1C,DVL2,GALNT2,ACTB,MYH9,KIF13B,AP1M1,KDELR1,BLOC1S3,OPTN,FTH1,UBQLN2,AP2A1,AP2A2,CUX1,RAB11B,IGF2R,VPS37B,LDLR,CLTA,FCHO1,VPS37C,GRB2,ARF3,LMAN2,SCARB1,MAN1C1,SH3KBP1,AP1B1,EREG,KIF26B,DYNC1H1,SH3GL1,TRAPPC1,BLOC1S4,KIF1C,CTSZ,TUBB2A,NAPA,COPS7A,TRIP10,TRAPPC9,WASL,SRC,SCARB2,APOL1,RAB32,STX4,SURF4,EPS15L1,HIP1R,AKT1,GBF1,PPP6R1,ARF5,RAB35,RAB6A,DNM2,EPN1…
499	REACTOME_SPRY_REGULATION_OF_FGF_SIGNALING	0.0658307	0.16341	0.535691	1.45735	41	16	GRB2,SRC,PPP2R1A,SPRY2,PPP2CB,CBL,MAPK3,MAPK1,MKNK1
500	REACTOME_DISEASES_OF_METABOLISM	0.012035	0.048471	0.348798	1.45698	10	192	AGRN,CTSA,B4GALT7,THSD7A,THSD1,EXT1,ADAMTS1,NOTCH2,THBS1,ALG2,DAG1,GYS1,HSPG2,SPON2,NAGLU,ALG12,G6PC3,NUS1,MOGS,FDXR,CHST14,PC,ADAMTS17,MAN1B1,GPC6,SDC1,CSPG4,NHLRC1,MUC20,GAA,CD320,NOTCH3,ABCA3,ACACA,CYP24A1,MCCC2,MUC16,SDC3,CYP2U1,ADAMTSL5,ADAMTS7,NEU1,SLC34A2,CYP27A1,C1GALT1,MUC21,ADAMTSL4,UGT1A1,GUSB,PMM2,THSD4,MUC15,CHSY1,NOTCH1,GNS,CHST6,SDC4,SPON1,ST3GAL3,TBXAS1,IDUA,GALE,GCLM,HGSNAT,DHDDS…
501	REACTOME_ERYTHROPOIETIN_ACTIVATES_STAT5	0.0706522	0.169376	0.712806	1.45576	38	6	IRS2,STAT5A,JAK2,STAT5B,LYN
502	REACTOME_COOPERATION_OF_PDCL_PHLP1_AND_TRIC_CCT_IN_G_PROTEIN_BETA_FOLDING	0.0628743	0.158019	0.481739	1.45535	41	25	GNB2,CSNK2A2,GNB4,GNB1,GNG4,GNA15,GNA11
503	REACTOME_RHOH_GTPASE_CYCLE	0.0551524	0.144708	0.450968	1.45289	37	33	JUP,ARHGDIA,PAK4,CSK,NSFL1C,DBN1,CAV1,VANGL1,PAK2,PAK6,LAMTOR1,VCP,ROCK1
504	REACTOME_PKMTS_METHYLATE_HISTONE_LYSINES	0.0419397	0.119162	0.41196	1.45234	31	55	RELA,KMT2E,KMT2C,EHMT1,NFKB2,EHMT2,RBBP7,NFKB1,H4C4,H3C13,WDR5,SETD1A,PRDM16,SETD6,NSD1,KMT2A,AEBP2,H3C6,SETD1B,KMT5A,SETD7,ATF7IP,DOT1L,EED,NSD2,SETD2,ASH1L
505	REACTOME_NETRIN_MEDIATED_REPULSION_SIGNALS	0.0722022	0.172323	0.741003	1.45205	39	5	NTN1,SRC,UNC5B,UNC5C
506	REACTOME_FCGR_ACTIVATION	0.0733788	0.173944	0.666085	1.45106	42	7	SRC,FYN,YES1,LYN,FCGR1A
507	REACTOME_G_PROTEIN_MEDIATED_EVENTS	0.0381992	0.110419	0.423393	1.45044	27	46	PRKACA,PRKCD,PLCB3,GNAI2,GNA15,GNA11,AHCYL1,GRK2,ADCY9,PRKX,ADCY7,ITPR1,ITPR2,CAMKK2,ITPR3,ADCY5,PRKAR1B,ADCY4
508	REACTOME_DSCAM_INTERACTIONS	0.0786325	0.182269	0.626774	1.44956	45	9	NTN1,MAPK14,MAPK13
509	REACTOME_PEPTIDE_HORMONE_METABOLISM	0.0375839	0.108996	0.416938	1.44808	27	50	CTSD,INHBA,ACHE,CTSZ,GNB1,KLF4,MME,TCF7L2,ERO1A,CPE,SLC30A5,STX1A,INHBB
510	REACTOME_NEGATIVE_REGULATION_OF_FLT3	0.0696095	0.168591	0.591486	1.44749	40	11	CSK,PTPRJ,SH2B3,SOCS2,ABL2,CBL
511	REACTOME_P75_NTR_RECEPTOR_MEDIATED_SIGNALLING	0.0356704	0.104967	0.378783	1.44718	28	91	RELA,ARHGDIA,ARHGEF18,APH1A,IRAK1,TRIO,NFKBIA,ARHGEF40,ARHGEF37,ARHGEF10L,VAV2,RTN4R,AKAP13,VAV1,ITSN1,NFKB1,FGD2,SQSTM1,ABR,MYD88,PLEKHG2,ARHGEF1,NCSTN,NGFR,RIPK2,RTN4,ARHGEF16,BEX3,FGD1,ARHGEF11,ARHGEF5
512	REACTOME_ESTROGEN_STIMULATED_SIGNALING_THROUGH_PRKCZ	0.0742754	0.174938	0.708122	1.4462	40	6	PRKCZ,HRAS,PDPK1,KRAS,MAPK1
513	REACTOME_CLASS_I_MHC_MEDIATED_ANTIGEN_PROCESSING_PRESENTATION	0.00417973	0.0276254	0.332419	1.44537	3	346	HERC6,TAP1,DTX3L,HERC5,RNF213,SOCS1,FBXW4,RNF114,RBCK1,HLA-A,UBE2J2,TAP2,TRAF7,UBE2L6,TRIM69,KEAP1,UBE2D2,RNF19B,FBXL18,TRIM21,TAPBP,RNF126,NCF1,FBXO6,PSMA6,UBA1,ITGB5,HUWE1,SMURF1,UBE2Z,UBA7,ZNRF2,STX4,UBR4,HLA-B,UBE2S,KLHL21,PSMD3,CDC34,UBE2R2,HECTD3,HLA-E,FBXO32,PSMB9,FZR1,SOCS3,UBE3C,HLA-F,HLA-C,ASB6,UBE2H,UBE2M,LRRC41,TLR2,UBE2O,CUL3,MEX3C,SEC24C,PSMB10,LRSAM1,RNF115,MGRN1,UBE2E3,FBXW9,NEDD4…
514	REACTOME_GRB2_EVENTS_IN_ERBB2_SIGNALING	0.0704	0.169376	0.542036	1.44457	43	15	GRB2,EREG,NRG2,EGFR,HRAS,EGF,ERBB2,KRAS,BTC,HBEGF,SOS1
515	REACTOME_GABA_B_RECEPTOR_ACTIVATION	0.0590909	0.151585	0.49096	1.44418	38	23	GNB2,GNB4,GNB1,GNG4,GNAI2,ADCY9,ADCY7,KCNJ5,ADCY5,ADCY4
516	REACTOME_ASSOCIATION_OF_TRIC_CCT_WITH_TARGET_PROTEINS_DURING_BIOSYNTHESIS	0.05	0.133361	0.437862	1.44218	34	38	FBXW4,TP53,SPHK1,FBXO6,USP11,DCAF7,FKBP9,SKIV2L,STAT3
517	REACTOME_WNT_MEDIATED_ACTIVATION_OF_DVL	0.0838926	0.190287	0.640172	1.44163	49	8	DVL2,CSNK2A2,DVL3,DVL1,PIP5K1B,CSNK1E
518	REACTOME_NOTCH4_INTRACELLULAR_DOMAIN_REGULATES_TRANSCRIPTION	0.0626959	0.157817	0.514742	1.44087	39	18	NOTCH2,HES1,CREBBP,SMAD3,EP300,KAT2B,ACTA2,MAML2,NOTCH1
519	REACTOME_GAMMA_CARBOXYLATION_HYPUSINE_FORMATION_AND_ARYLSULFATASE_ACTIVATION	0.0595065	0.152167	0.447166	1.44064	40	33	EEF2,GAS6,FURIN,EIF5A,ARSJ,STS,DOHH,ARSA,ARSI,SUMF2,FN3KRP,FN3K,DPH1,ARSD
520	REACTOME_SEMA3A_PAK_DEPENDENT_AXON_REPULSION	0.0736	0.174111	0.552326	1.43959	45	14	PLXNA1,NRP1,LIMK1,PLXNA2,FYN,CFL1,PAK2
521	REACTOME_MEMBRANE_TRAFFICKING	0.00100807	0.0175605	0.323432	1.43908	0	566	MVB12A,TOR1B,CAPZB,ACTG1,MYO1C,DVL2,GALNT2,ACTB,MYH9,KIF13B,AP1M1,KDELR1,BLOC1S3,OPTN,FTH1,UBQLN2,AP2A1,AP2A2,CUX1,RAB11B,IGF2R,VPS37B,LDLR,CLTA,FCHO1,VPS37C,GRB2,ARF3,LMAN2,MAN1C1,SH3KBP1,AP1B1,EREG,KIF26B,DYNC1H1,SH3GL1,TRAPPC1,BLOC1S4,KIF1C,CTSZ,TUBB2A,NAPA,COPS7A,TRIP10,TRAPPC9,WASL,SRC,SCARB2,RAB32,STX4,SURF4,EPS15L1,HIP1R,AKT1,GBF1,PPP6R1,ARF5,RAB35,RAB6A,DNM2,EPN1,TBC1D10B,BET1L,UBAP1,RAB2…
522	REACTOME_SYNTHESIS_OF_PI	0.0848375	0.191151	0.733135	1.43663	46	5	CDIPT,PITPNM1,PITPNM2
523	REACTOME_GRB7_EVENTS_IN_ERBB2_SIGNALING	0.0848375	0.191151	0.732935	1.43624	46	5	NRG2,ERBB2,GRB7,ERBB3
524	REACTOME_MET_ACTIVATES_PI3K_AKT_SIGNALING	0.0848375	0.191151	0.732292	1.43498	46	5	GRB2,MET,PIK3CA
525	REACTOME_NUCLEOTIDE_CATABOLISM	0.0667634	0.164207	0.454462	1.43452	45	29	SAMHD1,XDH,NT5C3A,TYMP,NT5C2,UPP1
526	REACTOME_WNT5A_DEPENDENT_INTERNALIZATION_OF_FZD4	0.0768	0.179599	0.550084	1.43374	47	14	DVL2,AP2A1,AP2A2,CLTA,ARRB2,AP2M1,CLTC,AP2S1,CLTB
527	REACTOME_REGULATION_OF_COMMISSURAL_AXON_PATHFINDING_BY_SLIT_AND_ROBO	0.0889262	0.199527	0.636578	1.43354	52	8	NTN1,SRC,SLIT2
528	REACTOME_RUNX1_REGULATES_TRANSCRIPTION_OF_GENES_INVOLVED_IN_WNT_SIGNALING	0.0630631	0.158247	0.779426	1.43165	34	4	AXIN1,RUNX1,ESR1,CBFB
529	REACTOME_PKA_MEDIATED_PHOSPHORYLATION_OF_CREB	0.068038	0.165673	0.517356	1.43156	42	17	PRKACA,ADCY9,PRKX,ADCY7,ADCY5,PRKAR1B,ADCY4,PRKACB,PRKAR2B,ADCY6
530	REACTOME_ASSEMBLY_OF_THE_HIV_VIRION	0.0783699	0.181922	0.526036	1.43108	49	16	MVB12A,VPS37B,VPS37C,FURIN,UBAP1
531	REACTOME_TRANSCRIPTIONAL_REGULATION_BY_RUNX2	0.0335731	0.100962	0.368178	1.43106	27	106	STAT1,SOX9,CCND1,MMP13,ESRRA,ABL1,HES1,ITGA5,PPM1D,PSMA6,SRC,SMURF1,AKT1,PSMD3,MAF,BMP2,PSMB9,PSMB10,CDKN1A,HDAC6,PSMF1,WWP1,YES1,PSMB8,PSME3,NR3C1,RUNX1,YAP1,PSME2,BAX,ESR1,WWTR1,MAPK3,SATB2
532	REACTOME_LOSS_OF_FUNCTION_OF_MECP2_IN_RETT_SYNDROME	0.0656566	0.16341	0.574111	1.43051	38	12	PRKACA,TBL1X,MECP2,NCOR2,CAMK4
533	REACTOME_RECEPTOR_MEDIATED_MITOPHAGY	0.0730051	0.173468	0.584237	1.42975	42	11	CSNK2A2,PGAM5,SRC,MAP1LC3A
534	REACTOME_INTRINSIC_PATHWAY_FOR_APOPTOSIS	0.0447958	0.124008	0.406714	1.42825	33	53	BBC3,TP53,PMAIP1,AKT1,STAT3,YWHAG,APAF1,BAK1,DYNLL2,PPP3R1,BCL2L1,CDKN2A,BAX,MAPK3,AKT2,YWHAH,BID,NMT1,BCL2,MAPK1,GSDMD,AVEN,XIAP
535	REACTOME_ACTIVATED_NTRK3_SIGNALS_THROUGH_PI3K	0.0666667	0.164207	0.776301	1.42591	36	4	SRC,IRS1,PIK3CA
536	REACTOME_RUNX1_REGULATES_TRANSCRIPTION_OF_GENES_INVOLVED_IN_INTERLEUKIN_SIGNALING	0.0666667	0.164207	0.776242	1.4258	36	4	LIFR,RUNX1,CBFB
537	REACTOME_REELIN_SIGNALLING_PATHWAY	0.0462107	0.126824	0.843863	1.42539	24	3	SH3KBP1,FYN,VLDLR
538	REACTOME_INFLAMMASOMES	0.0712025	0.170295	0.514916	1.42481	44	17	RELA,HMOX1,AIM2,APP,NFKB2,NFKB1,BCL2L1,PYCARD,CASP1,BCL2,PANX1,TXNIP
539	REACTOME_REGULATION_OF_TP53_ACTIVITY	0.0147895	0.0555383	0.348723	1.42467	12	155	PML,PRDM1,TP53,GATAD2A,HIPK2,CSNK2A2,GATAD2B,NBN,BRD1,ZNF385A,TAF7,MTA2,AKT1,PPP1R13L,TAF4B,PPP2R1A,RFFL,KAT6A,NOC2L,EHMT1,BRPF3,EHMT2,TAF4,RBBP7,EP300,STK11,MAPKAP1,MAPK14,MDM2,PPP2CB,HUS1,BRIP1,MTOR,PIP4K2B,USP7,PDPK1,USP2,CDKN2A,TAF6,PIP4K2C,PHF20,KAT5,TAF15,PIP4K2A,AKT2,CHD3,MLST8,CDK5R1,KMT5A,BRPF1,DYRK2
540	REACTOME_PI3K_AKT_ACTIVATION	0.0778986	0.181351	0.697383	1.42427	42	6	IRS2,IRS1,PIK3CA
541	REACTOME_SIGNALING_BY_NODAL	0.0726073	0.172777	0.557685	1.42419	43	13	DRAP1,PCSK6,FURIN,SMAD3,FOXO3,MAPK3,MAPK1,ACVR1C
542	REACTOME_TRANSCRIPTIONAL_REGULATION_OF_GRANULOPOIESIS	0.0530401	0.13962	0.399796	1.42118	40	56	PML,CEBPB,RARA,H2BC21,STAT3,CDKN1A,EP300,H2BC7,RXRA,H4C4,KLF5,H2BC6,H3C13,RUNX1,MYC,KMT2A,H3C6
543	REACTOME_HS_GAG_BIOSYNTHESIS	0.0662558	0.164207	0.487138	1.42114	42	22	AGRN,EXT1,HS3ST1,HSPG2,SLC35D2,NDST1,GPC6,SDC1,SDC3
544	REACTOME_ACTIVATION_OF_IRF3_IRF7_MEDIATED_BY_TBK1_IKK_EPSILON	0.0815047	0.187043	0.522179	1.42059	51	16	IRF7,TICAM1,TRAF3
545	REACTOME_METABOLISM_OF_LIPIDS	0.00100807	0.0175605	0.318829	1.4205	0	621	HELZ2,PTGS2,NR1D1,PRKACA,ACADS,PRKD2,SPHK1,AGPAT2,MID1IP1,PPARD,CTSA,SPNS2,ELOVL7,OSBP,MBOAT7,ESRRA,LPIN1,ALOX15,PLA2G4C,ACHE,CSNK2A2,FASN,TNFAIP8L1,ARF3,NUDT19,TECR,ACSL1,CPNE7,PLEKHA4,PIAS4,DEGS2,ACLY,ECI1,SGPP2,SMPD1,G0S2,SLC25A1,TBL1X,KPNB1,PLEKHA2,MTMR1,TNFRSF21,OSBPL10,SREBF2,SREBF1,MED15,MAPKAPK2,INPP5K,ALDH3B2,ETNK2,MED16,MGLL,VAPB,OSBPL5,PLD3,CDIPT,CARM1,SCAP,ARSJ,MED12,SLC27A1,STS,CSNK1…
546	REACTOME_INTERLEUKIN_1_FAMILY_SIGNALING	0.0199531	0.0693626	0.356666	1.41973	16	126	IL36RN,RELA,TOLLIP,IRAK1,PSMA6,IRAK2,NFKBIA,PTPN14,IL1A,STAT3,PSMD3,PSMB9,APP,TAB1,PTPN12,NOD2,NFKB2,PSMB10,SMAD3,NFKB1,NFKBIB,TAB2,SQSTM1,IL1RN,TNIP2,PSMF1,PTPN23,MAP3K8,TAB3,MYD88,PELI3,NKIRAS2,PTPN9,PSMB8,NOD1,PSME3,PSME2,IL36G,RIPK2,IL1B,CASP1,IL1R1,IL36A,MAP3K3
547	REACTOME_SARS_COV_INFECTIONS	0.0196078	0.0683728	0.350518	1.41933	16	141	PARP14,STAT2,PARP10,PARP9,GATAD2A,AP2A1,AP2A2,KEAP1,ZBP1,MGAT4B,PRKCSH,MGAT1,GATAD2B,ST3GAL1,JAK2,SIGMAR1,RCOR1,RIPK1,MTA2,FURIN,MOGS,CUL3,MAN1B1,CHMP4B,RBBP7,ST6GALNAC2,TMPRSS2,FXYD3,ST3GAL4,JAK1,UVRAG,CHMP7,VEGFA,ST6GALNAC4,PARP8,NR3C1
548	REACTOME_WNT_LIGAND_BIOGENESIS_AND_TRAFFICKING	0.0768025	0.179599	0.506767	1.41855	48	18	WNT7A,WNT7B,SNX3,PORCN,WNT3,WNT5B
549	REACTOME_N_GLYCAN_ANTENNAE_ELONGATION_IN_THE_MEDIAL_TRANS_GOLGI	0.0839813	0.190287	0.502046	1.4185	53	19	B4GALT5,MGAT4B,MGAT3,FUCA1,B4GALT2,ST3GAL4,FUT3,MGAT5,B4GALT3,B4GALT1
550	REACTOME_TRANSPORT_OF_VITAMINS_NUCLEOSIDES_AND_RELATED_MOLECULES	0.0734214	0.173944	0.441604	1.41839	49	32	SLCO4A1,SLC25A6,SLC35D2,SLC35A2,SLC27A1,SLC27A4,SLC29A2,SLC35B2,SLC29A4,SLCO3A1,SLC35C1
551	REACTOME_AMINE_LIGAND_BINDING_RECEPTORS	0.100855	0.216636	0.613115	1.41797	58	9	ADRB1,DRD4,ADRB2,HTR2B,HTR7
552	REACTOME_RHO_GTPASE_EFFECTORS	0.00963597	0.04173	0.331027	1.41711	8	270	PKN1,RHOB,ACTG1,PRKCD,FLNA,MYH14,DVL2,MYL9,MRTFA,ACTB,MYH9,RCC2,CDH1,ABL1,GRB2,FMNL3,DYNC1H1,TUBB2A,NCF1,H2BC21,WASL,RHOG,SRC,WIPF2,PRKCZ,SRF,WASF2,RTKN,LIMK1,BAIAP2,RHPN2,YWHAG,CENPS,PPP2R1A,RANGAP1,NCKAP1,CTTN,DIAPH1,MAPK14,CDKN1B,H2BC7,PPP2CB,CFL1,RAC2,KLC1,DYNLL2,H4C4,ARPC4,RHOC,H2BC6,DVL3,H3C13,WASF1,PAK2,PPP2R5B,PDPK1,WASF3,DVL1,PPP2R5A,TUBB4B,NCOA2,MAPK3,MYH10,KLC2,TUBB6
553	REACTOME_DOWNREGULATION_OF_SMAD2_3_SMAD4_TRANSCRIPTIONAL_ACTIVITY	0.0808824	0.18633	0.457823	1.41708	54	27	SERPINE1,SMAD3,NEDD4L,SKI,TGIF2,TGIF1,WWTR1,RNF111,SMURF2,NCOR2,USP9X,PPM1A,TRIM33
554	REACTOME_PI3K_EVENTS_IN_ERBB2_SIGNALING	0.0848	0.191151	0.531436	1.41632	52	15	GRB2,EREG,NRG2,EGFR,EGF,ERBB2,PIK3CA,BTC,HBEGF
555	REACTOME_AMYLOID_FIBER_FORMATION	0.0436457	0.122284	0.385163	1.41537	33	69	LTF,UBE2L6,MFGE8,APH1A,H2BC21,GSN,HSPG2,BACE1,TGFBI,FURIN,APP,TSPAN15,H2BC7,H4C4,H2BC6,H3C13,NCSTN,TSPAN33,H3C6,SIAH1,USP9X,TSPAN14,H2AX,PRKN
556	REACTOME_TP53_REGULATES_TRANSCRIPTION_OF_CELL_CYCLE_GENES	0.0474255	0.128841	0.409689	1.41456	34	49	GADD45A,TP53,TNKS1BP1,CNOT3,ARID3A,ZNF385A,CARM1,CNOT11,CDKN1A,EP300,CDKN1B
557	REACTOME_LISTERIA_MONOCYTOGENES_ENTRY_INTO_HOST_CELLS	0.0870918	0.195956	0.500272	1.41349	55	19	CDH1,GRB2,SH3KBP1,SH3GL1,SRC,MET,CBL
558	REACTOME_PEPTIDE_HORMONE_BIOSYNTHESIS	0.0833333	0.189351	0.692048	1.41337	45	6	INHBA,INHBB,INHA
559	REACTOME_ACTIVATED_NTRK3_SIGNALS_THROUGH_RAS	0.0833333	0.189351	0.691971	1.41321	45	6	GRB2,SHC1,HRAS,KRAS,SOS1
560	REACTOME_PYROPTOSIS	0.0703593	0.169376	0.472598	1.41269	46	24	TP53,IRF1,IL1A,CHMP4B,BAK1,IRF2,CHMP7,BAX,IL1B,CASP1,IL18,GSDMD
561	REACTOME_RUNX1_REGULATES_TRANSCRIPTION_OF_GENES_INVOLVED_IN_DIFFERENTIATION_OF_MYELOID_CELLS	0.0833333	0.189351	0.69168	1.41262	45	6	CSF2,CREBBP,RUNX1,RUNX2,CBFB
562	REACTOME_SIGNALING_BY_FGFR_IN_DISEASE	0.0458839	0.126142	0.408939	1.41254	33	48	STAT1,GTF2F1,CUX1,GRB2,STAT5A,POLR2A,STAT3,GAB2,MYO18A,FGF1,BCR,HRAS,STAT5B,POLR2D
563	REACTOME_SIGNALING_BY_NOTCH1	0.0465718	0.127381	0.386185	1.41163	35	68	HDAC9,HES1,HDAC11,APH1A,TBL1X,JAG1,HDAC5,CREBBP,TLE4,EP300,TLE1,HDAC6,HDAC7,TLE3,KAT2B,NCSTN,NEURL1B,MYC,MAML2,ARRB2,NOTCH1,ARRB1,DTX2,DTX4,NCOR2
564	REACTOME_POST_TRANSLATIONAL_PROTEIN_MODIFICATION	0.000999001	0.0175605	0.311565	1.41147	0	1219	IFIH1,DDX58,FN1,TRIM25,PML,USP18,TNFAIP3,CAPZB,TNIP1,CCN1,FBXW4,TRIM28,SHISA5,TP53,IGFBP4,HLA-A,RELA,CBX4,UBE2J2,CSF1,RAD23A,GALNT2,MRTFA,RARA,ACTB,B4GALT5,EEF2,SP100,RENBP,CTSA,KDELR1,HIPK2,FSTL3,GMDS,THSD7A,THSD1,OTUD5,KEAP1,QSOX1,USP42,UBE2D2,RAB11B,MGAT4B,FBXL18,TMEM132A,MGAT3,ADAMTS1,PLAUR,GPAA1,MFGE8,P4HB,THBS1,ARF3,ALG2,LMAN2,PRKCSH,MGAT1,MAN1C1,LY6E,PAF1,GAS6,DYNC1H1,DAG1,TRAPPC1,PIAS4,CT…
565	REACTOME_GOLGI_ASSOCIATED_VESICLE_BIOGENESIS	0.0576671	0.148554	0.400346	1.4114	43	55	AP1M1,BLOC1S3,FTH1,IGF2R,CLTA,AP1B1,BLOC1S4,NAPA,HIP1R,DNM2,RAB5C,GAK,SNX9,SORT1,ARRB1,PICALM,AP4E1,ARF1,TFRC,CLTC,CPD,SH3D19
566	REACTOME_SYNTHESIS_OF_IP3_AND_IP4_IN_THE_CYTOSOL	0.069697	0.168591	0.479568	1.41067	45	23	PLCB3,PLCD3,ITPK1,PLCD1,INPP5D,ITPKC,ITPKB,SYNJ1
567	REACTOME_CARDIAC_CONDUCTION	0.0465718	0.127381	0.385529	1.40923	35	68	PRKACA,KCNQ1,HIPK2,STIM1,ORAI1,CACNG4,AHCYL1,CACNG6,RYR1,CACNB1,FXYD3,ITPR1,ITPR2,ATP2A2,ITPR3,KAT2B,WWTR1,FGF11,FGF13,FKBP1B,KCNK6,TRPC1,ATP1A1,CACNB2,SCN4B,ATP1B1,CAMK2G,KCNK7,KCND2,CAMK2D
568	REACTOME_SLC_MEDIATED_TRANSMEMBRANE_TRANSPORT	0.0199778	0.0693626	0.341085	1.40894	17	168	SLC15A3,SLC7A11,SLCO4A1,SLC4A2,SLC9A1,SLC38A5,SLC5A1,SLC26A4,SLC43A2,SLC25A6,SLC39A3,SLC12A4,SLC35D2,SLC2A6,SLC16A3,SLC35A2,HEPH,SLC27A1,SLC9A7,SLC27A4,SLC39A7,SLC2A12,SLC7A1,BSG,SLC25A22,SLC6A9,RHCG,SLC8B1,SLC22A18,SLC39A14,SLC29A2,SLC30A5,SLC25A18,SLC35B2,SLC29A4,SLC34A2,RUNX1,SLC2A10,SLC30A1,SLCO3A1,SLC12A2,SLC2A1,SLC26A11,SLC35C1,SLC20A1,SLC3A2,SLC22A5,SLC36A1,SLC10A6,SLC7A5,SLC4A3,SLC12A7,SL…
569	REACTOME_TRANSCRIPTIONAL_REGULATION_BY_TP53	0.00625652	0.0322021	0.323909	1.40848	5	354	JUN,PML,BBC3,PRDM1,SESN2,GADD45A,TP53,FOS,G6PD,GATAD2A,GTF2F1,HIPK2,BCL2L14,TNKS1BP1,CSNK2A2,TNFRSF10B,CTDP1,GATAD2B,NBN,POLR2A,CNOT3,BRD1,MOV10,ARID3A,GSR,SUPT5H,NELFB,ZNF385A,PMAIP1,TAF7,MTA2,TNFRSF10A,AKT1,ELL,TNRC6B,COX5A,RRAGC,PPP1R13L,TAF4B,CARM1,CCNK,RRAGD,YWHAG,CNOT11,PPP2R1A,RFFL,KAT6A,TACO1,NOC2L,EHMT1,CREBBP,CDKN1A,BRPF3,APAF1,EHMT2,TAF4,RBBP7,EP300,STK11,MAPKAP1,MAPK14,AGO2,RRAGA,ERCC…
570	REACTOME_MAPK6_MAPK4_SIGNALING	0.0479798	0.130058	0.375609	1.40833	37	83	JUN,PRKACA,MMP2,CDC42EP5,PSMA6,MOV10,CCND3,PSMD3,TNRC6B,MMP10,PSMB9,DNAJB1,PSMB10,ETV4,NCOA3,FOXO3,AGO2,CDC42EP3,PSMF1,PAK2,PSMB8,PSME3,TNRC6C,AGO1,PSME2
571	REACTOME_GABA_SYNTHESIS_RELEASE_REUPTAKE_AND_DEGRADATION	0.0814941	0.187043	0.573935	1.40454	47	11	ABAT,DNAJC5,STXBP1,STX1A,RAB3A
572	REACTOME_PROTEIN_UBIQUITINATION	0.0566038	0.14637	0.379786	1.40435	44	73	HLA-A,UBE2J2,UBE2D2,PAF1,UBA1,UBE2Z,UBE2S,CDC34,PEX5,UBE2R2,RNF40,UBE2H,USP5,PEX14,UBE2E3,RNF152,RRAGA,H2BC7,BCL10,UBE2A,H2BC6,USP7,PEX10
573	REACTOME_SYNTHESIS_OF_PG	0.0989761	0.21459	0.644057	1.40307	57	7	PLD3,PLD2,PLD6,PGS1
574	REACTOME_MECP2_REGULATES_NEURONAL_RECEPTORS_AND_CHANNELS	0.0824916	0.188502	0.562554	1.40171	48	12	GPRIN1,MECP2,MET,FKBP5,NOTCH1,PTPN1
575	REACTOME_OTHER_SEMAPHORIN_INTERACTIONS	0.0924765	0.205206	0.514872	1.40071	58	16	SEMA7A,PLXNA1,PLXNA2,ITGA1,PLXND1
576	REACTOME_LRR_FLII_INTERACTING_PROTEIN_1_LRRFIP1_ACTIVATES_TYPE_I_IFN_PRODUCTION	0.099278	0.21459	0.714551	1.40022	54	5	CREBBP,EP300,IRF3,CTNNB1
577	REACTOME_PI_METABOLISM	0.0547771	0.143957	0.377526	1.3999	42	76	TNFAIP8L1,ARF3,PLEKHA4,PLEKHA2,MTMR1,INPP5K,PNPLA6,INPP5D,PIP5K1C,PI4KA,BMX,PI4K2A,PI4K2B,SYNJ2,PIP4K2B,PIP5K1A,RAB14,PLEKHA6,PIP4K2C,MTMR14,GDPD3,VAC14,INPP4A,SYNJ1,PIP4K2A,SBF1,GDPD5,PIK3CA,PLEKHA3,PIK3C2B,ARF1
578	REACTOME_CA_DEPENDENT_EVENTS	0.0818713	0.187617	0.440044	1.39976	55	30	PRKACA,PRKCD,GRK2,ADCY9,PRKX,ADCY7,CAMKK2,ADCY5,PRKAR1B,ADCY4,MAPK1,CAMK4,CAMK2G,PRKACB,CAMK2D,PRKAR2B,ADCY6
579	REACTOME_TRANSLATION_OF_SARS_COV_2_STRUCTURAL_PROTEINS	0.0559345	0.145333	0.408552	1.39959	40	46	PARP14,PARP10,PARP9,MGAT4B,PRKCSH,MGAT1,ST3GAL1,MOGS,MAN1B1,ST6GALNAC2,ST3GAL4,ST6GALNAC4,PARP8
580	REACTOME_GLYCEROPHOSPHOLIPID_BIOSYNTHESIS	0.0409146	0.116455	0.360175	1.39844	33	107	AGPAT2,MBOAT7,LPIN1,PLA2G4C,ACHE,CSNK2A2,CPNE7,OSBPL10,ETNK2,MGLL,OSBPL5,PLD3,CDIPT,PCYT2,AGPAT3,PTDSS2,MBOAT2,PITPNM1,PLD2,PLA2G4E,LPCAT1,DDHD2,PNPLA3,PITPNM2,LPCAT4,LIPH,PLD6
581	REACTOME_DEFECTIVE_LFNG_CAUSES_SCDO3	0.099278	0.21459	0.713305	1.39778	54	5	NOTCH2,NOTCH3,NOTCH1
582	REACTOME_YAP1_AND_WWTR1_TAZ_STIMULATED_GENE_EXPRESSION	0.089983	0.201096	0.570162	1.3953	52	11	CCN2,HIPK2,KAT2B,YAP1,WWTR1,TEAD3
583	REACTOME_DEFECTIVE_RIPK1_MEDIATED_REGULATED_NECROSIS	0.099278	0.21459	0.711949	1.39512	54	5	RIPK1,TRADD,FADD,CASP8,TRAF2
584	REACTOME_AMINO_ACIDS_REGULATE_MTORC1	0.0512821	0.136104	0.403884	1.39507	37	48	ATP6V0D1,SESN2,FNIP2,RRAGC,RRAGD,ATP6V0E2,RRAGA,RHEB,MTOR,RPTOR,FNIP1,WDR24,TCIRG1,LAMTOR1,NPRL3,BMT2,MLST8,ATP6V0B
585	REACTOME_INFECTION_WITH_MYCOBACTERIUM_TUBERCULOSIS	0.0808383	0.18633	0.466682	1.39501	53	24	RNF213,LTF,KPNB1,TLR2,DUSP16,CORO1A,VPS33B,MAPK3
586	REACTOME_NEF_MEDIATED_CD8_DOWN_REGULATION	0.0923913	0.205206	0.68161	1.39205	50	6	AP2A1,AP2A2,AP2M1,AP2S1
587	REACTOME_ACTIVATION_OF_BH3_ONLY_PROTEINS	0.0877193	0.197093	0.436366	1.38806	59	30	BBC3,TP53,PMAIP1,AKT1,YWHAG,DYNLL2,PPP3R1,AKT2,YWHAH,BID,BCL2
588	REACTOME_NEGATIVE_REGULATION_OF_FGFR4_SIGNALING	0.103077	0.219943	0.484596	1.38733	66	20	GRB2,SRC,PPP2R1A,SPRY2,FGF1,PPP2CB,CBL,MAPK3,MAPK1,MKNK1
589	REACTOME_CARNITINE_METABOLISM	0.0909091	0.202846	0.556628	1.38694	53	12	MID1IP1,PPARD,RXRA,ACACA,CPT1A,SLC22A5
590	REACTOME_ROBO_RECEPTORS_BIND_AKAP5	0.115772	0.239059	0.615637	1.38638	68	8	PRKACA,PRKACB,PPP3CB,PRKCA
591	REACTOME_IRF3_MEDIATED_ACTIVATION_OF_TYPE_1_IFN	0.0936937	0.207336	0.754652	1.38615	51	4	ZBP1,IRF3,DTX4
592	REACTOME_TRAFFICKING_OF_AMPA_RECEPTORS	0.0986133	0.21459	0.475077	1.38595	63	22	AP2A1,AP2A2,EPB41L1,CACNG4,GRIP2,MDM2,GRIP1,PICK1,DLG1,AP2M1,AP2S1,CAMK2G,CAMK2D
593	REACTOME_SARS_COV_1_INFECTION	0.0609756	0.155184	0.401266	1.38548	44	49	PARP14,PARP10,PARP9,PRKCSH,MGAT1,ST3GAL1,MOGS,CHMP4B,ST6GALNAC2,TMPRSS2,ST3GAL4,UVRAG,CHMP7,ST6GALNAC4,PARP8
594	REACTOME_SENSORY_PERCEPTION	0.0323699	0.0988173	0.342733	1.385	27	140	CAPZB,ACTG1,MYO1C,ACTB,AGRN,MYH9,LRP10,LDLR,GNB1,EPB41L1,GSN,TWF2,STRA6,HSPG2,KCNMA1,USH1G,CASK,EPS8L2,DNAJC5,GPC6,SDC1,CYP4V2,CTBP2,SPTBN1,STX1A,SDC3,ITPR3,TRIOBP,SCNN1B,RAB3A,TRPM4,SPTAN1,TMIE,HSD17B1,CNGA1,TMC1,TPRN,SYP,LRP1,SDC4,NMT1,SCNN1A,DHRS3,CIB2,RGS9,LRP12,CACNB2,MYO3B,TAS1R3,SCN4B,TAS2R3,GPC4,VAMP2,GPC1,LRP8,APOB,GPC2,PRKCQ
595	REACTOME_TRAF6_MEDIATED_INDUCTION_OF_TAK1_COMPLEX_WITHIN_TLR4_COMPLEX	0.0976	0.213633	0.519604	1.38479	60	15	TICAM1,IRAK2,TAB1,TAB2,TAB3
596	REACTOME_RUNX3_REGULATES_NOTCH_SIGNALING	0.1088	0.227928	0.53121	1.38455	67	14	HES1,JAG1,CREBBP,EP300,KAT2B,MAML2,NOTCH1,RUNX3,MAML1,MAMLD1
597	REACTOME_ANTIGEN_PROCESSING_UBIQUITINATION_PROTEASOME_DEGRADATION	0.0137858	0.0530046	0.321689	1.38373	12	286	HERC6,DTX3L,HERC5,RNF213,SOCS1,FBXW4,RNF114,RBCK1,UBE2J2,TRAF7,UBE2L6,TRIM69,KEAP1,UBE2D2,RNF19B,FBXL18,TRIM21,RNF126,FBXO6,PSMA6,UBA1,HUWE1,SMURF1,UBE2Z,UBA7,ZNRF2,UBR4,UBE2S,KLHL21,PSMD3,CDC34,UBE2R2,HECTD3,FBXO32,PSMB9,FZR1,SOCS3,UBE3C,ASB6,UBE2H,UBE2M,LRRC41,UBE2O,CUL3,MEX3C,PSMB10,LRSAM1,RNF115,MGRN1,UBE2E3,FBXW9,NEDD4L,PSMF1,BTBD6,SH3RF1,WWP1,FBXO31,UBE2A,HERC2,PSMB8,FBXW5,SPSB2,KLHL5,PSME3…
598	REACTOME_MATURATION_OF_SARS_COV_1_SPIKE_PROTEIN	0.106498	0.225113	0.705785	1.38304	58	5	PRKCSH,MGAT1,MOGS,GANAB
599	REACTOME_EGFR_TRANSACTIVATION_BY_GASTRIN	0.121368	0.248126	0.597928	1.38285	70	9	GRB2,EGFR,HRAS,KRAS,HBEGF,SOS1
600	REACTOME_VOLTAGE_GATED_POTASSIUM_CHANNELS	0.100313	0.215917	0.507923	1.3818	63	16	KCNQ1,KCNG1,KCNAB1,KCNS3,KCNH3,KCND2
601	REACTOME_MTORC1_MEDIATED_SIGNALLING	0.0898204	0.201096	0.462097	1.3813	59	24	EIF4G1,AKT1S1,RRAGC,RRAGD,RRAGA,RHEB,MTOR,RPTOR,EEF2K,LAMTOR1,MLST8
602	REACTOME_AKT_PHOSPHORYLATES_TARGETS_IN_THE_CYTOSOL	0.1104	0.230381	0.529825	1.38094	68	14	AKT1S1,AKT1,CDKN1A,CDKN1B,MDM2,AKT2,GSK3A,TSC2,AKT3
603	REACTOME_PLATELET_SENSITIZATION_BY_LDL	0.0992	0.21459	0.518032	1.3806	61	15	PPP2R1A,MAPK14,PPP2CB,PPP2R5B,PPP2R5A,PPP2R5D,LRP8,APOB,PPP2R5E
604	REACTOME_SIGNALING_BY_FGFR4_IN_DISEASE	0.107383	0.22584	0.576443	1.38014	63	10	GRB2,HRAS,KRAS,PIK3CA,SOS1,GAB1,PLCG1
605	REACTOME_INSERTION_OF_TAIL_ANCHORED_PROTEINS_INTO_THE_ENDOPLASMIC_RETICULUM_MEMBRANE	0.0945736	0.208996	0.479114	1.38006	60	21	UBE2J2,BAG6,EMD,HMOX1,SGTA,APP,UBL4A,STX1A,GET4,GET3,PRNP,CAMLG
606	REACTOME_TP53_REGULATES_TRANSCRIPTION_OF_CELL_DEATH_GENES	0.0688259	0.166986	0.404952	1.37902	50	43	BBC3,TP53,BCL2L14,TNFRSF10B,PMAIP1,TNFRSF10A,CREBBP,APAF1,CASP10,TNFRSF10C,BAX,CASP1
607	REACTOME_SIGNALING_BY_MST1	0.104505	0.221814	0.75062	1.37874	57	4	SPINT1,MST1,MST1R,SPINT2
608	REACTOME_NEGATIVE_REGULATION_OF_FGFR3_SIGNALING	0.109231	0.228237	0.481291	1.37787	70	20	GRB2,SRC,PPP2R1A,SPRY2,FGF1,PPP2CB,CBL,MAPK3,MAPK1,MKNK1
609	REACTOME_ATF4_ACTIVATES_GENES_IN_RESPONSE_TO_ENDOPLASMIC_RETICULUM_STRESS	0.0962963	0.211642	0.447826	1.37451	64	26	ATF3,CEBPB,KHSRP,DDIT3
610	REACTOME_IRS_MEDIATED_SIGNALLING	0.10177	0.218311	0.442129	1.37413	68	28	GRB2,IRS2,GAB2,TRIB3,FGF1,HRAS,IRS1,PDPK1,KRAS,AKT2,PIK3CA
611	REACTOME_UPTAKE_AND_FUNCTION_OF_ANTHRAX_TOXINS	0.106961	0.225247	0.561464	1.37402	62	11	MAP2K2,MAP2K3,ANTXR2,FURIN,MAP2K7
612	REACTOME_TGF_BETA_RECEPTOR_SIGNALING_ACTIVATES_SMADS	0.0969163	0.212714	0.427729	1.37382	65	32	PPP1R15A,SMURF1,PMEPA1,FURIN,BAMBI,UBE2M,TGFB1,SMAD3,NEDD4L,TGFBR2,PPP1CA,CBL,SMURF2,STUB1,STRAP,XPO1
613	REACTOME_CREATINE_METABOLISM	0.125839	0.253725	0.609746	1.37312	74	8	GAMT,CKB
614	REACTOME_TCF_DEPENDENT_SIGNALING_IN_RESPONSE_TO_WNT	0.0305677	0.0943382	0.330107	1.37296	27	179	SMARCA4,DVL2,SOX9,CSNK2A2,SOX4,H2BC21,FZD5,PSMA6,SOX2,FZD1,CTNNBIP1,CHD8,AKT1,PSMD3,TCF7L1,ZNRF3,PSMB9,TCF7L2,CSNK1G2,AXIN1,PPP2R1A,CREBBP,CUL3,PSMB10,TLE4,EP300,TLE1,CAV1,WNT3,H2BC7,PPP2CB,PSMF1,CTBP1,H4C4,TLE3,H2BC6,DVL3,TRRAP,H3C13,KREMEN1,PSMB8,PPP2R5B,DVL1,PSME3,PPP2R5A,PSME2,BCL9L,LRP5,MYC,KAT5,SOX13,H3C6,SMURF2,AKT2,FZD8,CSNK1A1,SOX6
615	REACTOME_TRANSPORT_OF_FATTY_ACIDS	0.104505	0.221814	0.747382	1.37279	57	4	SLC27A1,SLC27A4,LCN12,APOD
616	REACTOME_ROLE_OF_PHOSPHOLIPIDS_IN_PHAGOCYTOSIS	0.111975	0.233064	0.485528	1.37183	71	19	PRKCD,PLD3,AHCYL1,PLD2,ITPR1,ITPR2,ITPR3
617	REACTOME_POU5F1_OCT4_SOX2_NANOG_REPRESS_GENES_RELATED_TO_DIFFERENTIATION	0.106884	0.225247	0.671042	1.37047	58	6	GATA6,SOX2,DKK1
618	REACTOME_MRNA_EDITING	0.12116	0.248126	0.629023	1.37032	70	7	ADAR,APOBEC3A,APOBEC3C,APOBEC3B
619	REACTOME_INTERLEUKIN_1_SIGNALING	0.0598086	0.152455	0.353381	1.36713	49	97	RELA,TOLLIP,IRAK1,PSMA6,IRAK2,NFKBIA,IL1A,PSMD3,PSMB9,APP,TAB1,NOD2,NFKB2,PSMB10,NFKB1,NFKBIB,TAB2,SQSTM1,IL1RN,TNIP2,PSMF1,MAP3K8,TAB3,MYD88,PELI3,NKIRAS2,PSMB8,NOD1,PSME3,PSME2,RIPK2,IL1B
620	REACTOME_SUMOYLATION_OF_TRANSCRIPTION_FACTORS	0.0971787	0.213	0.488225	1.36664	61	18	TP53,PIAS4,TFAP2A,MDM2,CDKN2A,HIC1,SUMO3,TFAP2C,PIAS3,MTA1
621	REACTOME_APOPTOTIC_CLEAVAGE_OF_CELL_ADHESION_PROTEINS	0.115772	0.239059	0.570464	1.36582	68	10	CDH1,TJP2,DSP,TJP1,PKP1,DSG2,CTNNB1
622	REACTOME_INTERLEUKIN_23_SIGNALING	0.108696	0.227928	0.668476	1.36523	59	6	P4HB,JAK2,STAT3,TYK2,STAT4
623	REACTOME_TP53_REGULATES_TRANSCRIPTION_OF_GENES_INVOLVED_IN_CYTOCHROME_C_RELEASE	0.11353	0.235692	0.48294	1.36452	72	19	BBC3,TP53,PMAIP1,CREBBP,BAX,BID,STEAP3
624	REACTOME_ROLE_OF_SECOND_MESSENGERS_IN_NETRIN_1_SIGNALING	0.124549	0.252666	0.695774	1.36342	68	5	NTN1,PITPNA,TRPC1
625	REACTOME_RAB_GERANYLGERANYLATION	0.0823529	0.188453	0.381378	1.36163	62	59	RAB11B,RAB32,RAB35,RAB6A,RAB21,RAB8B,RAB5C,RAB27B,RAB12,RAB1B,RAB22A,RAB3A,RAB13,RAB10,RAB14,RAB3D,RAB20,RAB6B
626	REACTOME_REGULATION_OF_INNATE_IMMUNE_RESPONSES_TO_CYTOSOLIC_DNA	0.10231	0.218887	0.532887	1.36087	61	13	ZBP1,TRIM21,TRIM56,IRF3,DTX4
627	REACTOME_SIGNALING_BY_NTRK2_TRKB	0.10303	0.219943	0.462533	1.36056	67	23	GRB2,SHC1,SRC,FYN,HRAS,KRAS,CDK5R1,PIK3CA,NTF4,DOCK3,TIAM1
628	REACTOME_BIOSYNTHESIS_OF_EPA_DERIVED_SPMS	0.125	0.252666	0.664627	1.35737	68	6	PTGS2,ALOX15,GPX4,HPGD,ALOX5
629	REACTOME_ATTENUATION_PHASE	0.113772	0.235891	0.448851	1.356	75	25	HSPA6,HSPA1A,DEDD2,HSPA1B,TNFRSF21,HSF1,DNAJB1,CREBBP,EP300,HSPA2
630	REACTOME_HDMS_DEMETHYLATE_HISTONES	0.09	0.201096	0.415586	1.35539	62	35	KDM2A,KDM3B,KDM5C,KDM4B,PHF2,H4C4,H3C13,PHF8,H3C6,KDM6A,KDM7A,KDM6B
631	REACTOME_PYRIMIDINE_CATABOLISM	0.139932	0.272952	0.621949	1.35491	81	7	NT5C3A,TYMP,UPP1,NT5E
632	REACTOME_ACTIVATION_OF_THE_AP_1_FAMILY_OF_TRANSCRIPTION_FACTORS	0.120805	0.24792	0.565776	1.3546	71	10	JUN,FOS,MAPK14,MAPK3,MAPK1,MAPK9
633	REACTOME_METABOLISM_OF_WATER_SOLUBLE_VITAMINS_AND_COFACTORS	0.0527578	0.139104	0.347808	1.35427	43	109	PTGS2,PARP14,PARP10,SLC52A2,PARP9,PANK4,FASN,NADK,CYB5R3,PANK2,NAPRT,FPGS,GPHN,PC,NFS1,PDXK,ALDH1L2,CD320,COASY,ACACA,MCCC2,ALDH1L1,PARP8,MTHFD1L,SLC2A1,SLC52A3,CD38,MTHFR
634	REACTOME_SIGNALING_BY_NOTCH1_T_7_9_NOTCH1_M1580_K2555_TRANSLOCATION_MUTANT	0.132246	0.264657	0.662837	1.35371	72	6	JAG1,NOTCH1,DLL1,JAG2,ADAM10
635	REACTOME_HDL_ASSEMBLY	0.134058	0.266101	0.661426	1.35083	73	6	PRKACA,BMP1,ABCA1,PRKACB
636	REACTOME_TBC_RABGAPS	0.0911602	0.203125	0.402492	1.35079	65	41	OPTN,RAB11B,RAB35,RAB6A,TBC1D10B,TBC1D16,RAB8B,RAB5C,ARF6,TBC1D10A
637	REACTOME_PTK6_REGULATES_CELL_CYCLE	0.134058	0.266101	0.661404	1.35078	73	6	CCND1,CDKN1B,PTK6
638	REACTOME_REGULATION_OF_GENE_EXPRESSION_IN_BETA_CELLS	0.134058	0.266101	0.660893	1.34974	73	6	FOXA2,AKT1,AKT2,AKT3
639	REACTOME_SYNTHESIS_OF_VERY_LONG_CHAIN_FATTY_ACYL_COAS	0.12069	0.24792	0.482126	1.34957	76	18	ELOVL7,TECR,ACSL1,ELOVL6
640	REACTOME_INOSITOL_PHOSPHATE_METABOLISM	0.0985155	0.21459	0.39618	1.34914	72	43	ISYNA1,PLCB3,PLCD3,ITPK1,INPP5A,PLCD1,INPP5D,ITPKC,NUDT3,MINPP1,ITPKB,INPP4A,SYNJ1,IP6K1,NUDT4
641	REACTOME_POTENTIAL_THERAPEUTICS_FOR_SARS	0.0712468	0.170295	0.364421	1.34811	55	75	STAT2,GATAD2A,AP2A1,AP2A2,KEAP1,ZBP1,GATAD2B,JAK2,SIGMAR1,RCOR1,RIPK1,MTA2,FURIN,CUL3,RBBP7,FXYD3,JAK1,VEGFA,NR3C1,IL1R1,BRD4,CHD3,ROCK1,AP2M1,IFNAR2,ATP1A1,SAP30L,AP2S1,MTA1,ATP1B1,TYK2
642	REACTOME_RND3_GTPASE_CYCLE	0.0949008	0.209432	0.405691	1.34685	66	39	SEMA4F,EPHA2,CKB,CKAP4,SCRIB,ARHGAP35,CAV1,DSP,VANGL1,TNFAIP1,RASAL2,PICALM,ROCK1,ARHGAP21,CPD,PKP4,NISCH,TMOD3
643	REACTOME_MET_RECEPTOR_RECYCLING	0.145299	0.280332	0.580775	1.34318	84	9	GRB2,ARF6,MET,CRK,CRKL,GGA3
644	REACTOME_CELLULAR_RESPONSES_TO_STIMULI	0.00200803	0.0208706	0.300268	1.34291	1	694	JUN,HELZ2,ATF3,NR1D1,CAPZB,ATP6V0D1,SESN2,TP53,H1-0,HSPA6,CEBPB,FNIP2,PRKCD,FOS,RELA,CBX4,HDGF,HSPA1A,LMNA,BAG3,CDKN2B,TLN1,KHSRP,TXNRD2,KEAP1,UBE2D2,RPS6KA2,ETS1,MAP2K3,GRB10,CSNK2A2,DEDD2,P4HB,PPP1R15A,DYNC1H1,TUBB2A,HMGA1,NCF1,AKT1S1,H2BC21,NBN,CBX6,PHC2,HSPA1B,PSMA6,AJUBA,SHC1,TBL1X,MOV10,H1-4,GSR,MYDGF,TNFRSF21,ADD1,MAPKAPK2,POM121C,HMOX1,IL1A,UBE2S,YIF1A,CDK6,STAT3,PSMD3,TNRC6B,COX5A,RRAGC,…
645	REACTOME_SIGNALING_BY_CTNNB1_PHOSPHO_SITE_MUTANTS	0.1232	0.250917	0.5037	1.3424	76	15	AXIN1,PPP2R1A,PPP2CB,PPP2R5B,PPP2R5A,CSNK1A1,AMER1,PPP2R5D,CTNNB1,PPP2R5E
646	REACTOME_INTERLEUKIN_37_SIGNALING	0.133229	0.266101	0.478495	1.33941	84	18	PTPN14,STAT3,PTPN12,SMAD3,PTPN23,PTPN9,CASP1,PTPN18,PTPN20,IL18R1,SIGIRR
647	REACTOME_TICAM1_RIP1_MEDIATED_IKK_COMPLEX_RECRUITMENT	0.127527	0.255848	0.473853	1.33884	81	19	TICAM1,UBE2D2,BIRC3,RIPK1,TLR3
648	REACTOME_GP1B_IX_V_ACTIVATION_SIGNALLING	0.145973	0.280624	0.594501	1.33878	86	8	FLNA,SRC,COL1A1,VWF,GP1BA
649	REACTOME_NEGATIVE_REGULATION_OF_FGFR1_SIGNALING	0.124031	0.25229	0.464619	1.33831	79	21	GRB2,SRC,PPP2R1A,SPRY2,FGF1,PPP2CB,CBL,MAPK3,MAPK1,MKNK1
650	REACTOME_BLOOD_GROUP_SYSTEMS_BIOSYNTHESIS	0.134796	0.266777	0.478025	1.33809	85	18	ST3GAL4,RHCE,FUT3,FUT1,FUT6,ST6GALNAC6,ST3GAL3
651	REACTOME_DOWNSTREAM_SIGNALING_OF_ACTIVATED_FGFR1	0.136364	0.269468	0.477406	1.33636	86	18	GRB2,SHC1,FGF1,HRAS,KRAS,FLRT2,PIK3CA
652	REACTOME_CATION_COUPLED_CHLORIDE_COTRANSPORTERS	0.153153	0.288236	0.726861	1.3351	84	4	SLC12A4,SLC12A2,SLC12A7,SLC12A6
653	REACTOME_METABOLISM_OF_VITAMINS_AND_COFACTORS	0.0489749	0.131717	0.325653	1.33458	42	159	PTGS2,PARP14,PARP10,SLC52A2,PARP9,SPR,AGRN,LRP10,PANK4,LDLR,FASN,NADK,CYB5R3,PANK2,HSPG2,AKT1,NAPRT,FPGS,GPHN,PC,GPC6,NFS1,SDC1,PDXK,ALDH1L2,CD320,COASY,ACACA,MCCC2,SDC3,ALDH1L1,PARP8,MTHFD1L,SLC2A1,SLC52A3,CD38,MTHFR,SHMT2,GCH1,NAMPT,VKORC1L1,LRP1,NT5E,SDC4,NAXE,THTPA,PNPO,LRP12,ABCC1,ABCD4,PRSS3,HLCS,GPC4,SLC25A16,SLC19A2,GPC1,PDSS1,NMNAT2,LRP8,APOB,GPC2
654	REACTOME_ADRENOCEPTORS	0.106618	0.225113	0.865559	1.33383	57	2	ADRB1,ADRB2
655	REACTOME_ORGANIC_CATION_TRANSPORT	0.147651	0.282501	0.59204	1.33324	87	8	SLC22A18,RUNX1,SLC22A5,SLC22A15,SLC22A3
656	REACTOME_ORGANIC_CATION_ANION_ZWITTERION_TRANSPORT	0.147651	0.282501	0.59204	1.33324	87	8	SLC22A18,RUNX1,SLC22A5,SLC22A15,SLC22A3
657	REACTOME_FATTY_ACYL_COA_BIOSYNTHESIS	0.124819	0.252666	0.422173	1.3326	85	29	ELOVL7,FASN,TECR,ACSL1,ACLY,SLC25A1,ELOVL6,ACACA,SCD5,MORC2
658	REACTOME_RHO_GTPASES_ACTIVATE_PKNS	0.095176	0.209752	0.369012	1.33184	72	63	PKN1,RHOB,MYH14,MYL9,MYH9,H2BC21,YWHAG,H2BC7,H4C4,RHOC,H2BC6,H3C13,PDPK1,NCOA2,MYH10,H3C6,PKN3,YWHAH
659	REACTOME_FATTY_ACIDS_BOUND_TO_GPR40_FFAR1_REGULATE_INSULIN_SECRETION	0.150171	0.284953	0.611126	1.33133	87	7	PLCB3,GNA15,GNA11
660	REACTOME_SIGNALING_BY_FGFR	0.0917197	0.204089	0.359891	1.32702	71	70	GTF2F1,PTBP1,SPRED1,GRB2,SHC1,POLR2A,RBFOX2,SRC,PPP2R1A,FGFRL1,SPRY2,FGF1,PPP2CB,HRAS,HNRNPM,POLR2D,CBL,MAPK3,TIAL1,SPRED2,KRAS,FLRT2,PIK3CA,MAPK1,MKNK1
661	REACTOME_CROSS_PRESENTATION_OF_PARTICULATE_EXOGENOUS_ANTIGENS_PHAGOSOMES	0.151877	0.286839	0.609062	1.32684	88	7	NCF1,ITGB5,ITGAV,NCF4
662	REACTOME_MITOCHONDRIAL_IRON_SULFUR_CLUSTER_BIOGENESIS	0.126263	0.253944	0.531713	1.32486	74	12	SLC25A28,FDXR,NFS1,GLRX5,SLC25A37
663	REACTOME_ACTIVATION_OF_RAC1	0.134126	0.266101	0.541373	1.32485	78	11	NCK2,PAK4,PAK2,PAK6
664	REACTOME_SIGNALING_BY_FGFR3_FUSIONS_IN_CANCER	0.151007	0.286202	0.552924	1.32383	89	10	GRB2,HRAS,KRAS,PIK3CA,SOS1
665	REACTOME_CHYLOMICRON_CLEARANCE	0.163964	0.304316	0.720467	1.32335	90	4	LDLR,LDLRAP1,APOB,APOE
666	REACTOME_PLASMA_LIPOPROTEIN_ASSEMBLY	0.137521	0.270839	0.540153	1.32187	80	11	PRKACA,P4HB,BMP1,ABCA1,APOB,PRKACB,APOE,MTTP
667	REACTOME_SHC1_EVENTS_IN_ERBB4_SIGNALING	0.132013	0.264519	0.516173	1.31818	79	13	GRB2,EREG,SHC1,NRG2,HRAS,KRAS,BTC,HBEGF,SOS1
668	REACTOME_GABA_RECEPTOR_ACTIVATION	0.144118	0.27872	0.425444	1.31686	97	27	GNB2,GNB4,GNB1,GNG4,GNAI2,ADCY9,ADCY7,KCNJ5,ADCY5,ADCY4
669	REACTOME_TRANSCRIPTIONAL_REGULATION_OF_PLURIPOTENT_STEM_CELLS	0.139498	0.272733	0.483557	1.31552	88	16	GATA6,KLF4,SOX2,STAT3
670	REACTOME_SHC_MEDIATED_CASCADE_FGFR4	0.167521	0.308431	0.568312	1.31436	97	9	GRB2,SHC1,FGF1,HRAS,KRAS
671	REACTOME_ACTIVATION_OF_ANTERIOR_HOX_GENES_IN_HINDBRAIN_DEVELOPMENT_DURING_EARLY_EMBRYOGENESIS	0.103362	0.22026	0.34791	1.3142	82	86	JUN,EGR2,RARA,H2BC21,AJUBA,POLR2A,KMT2C,CREBBP,NCOA3,RBBP7,EP300,YY1,H2BC7,RXRA,H4C4,H2BC6,H3C13,WDR5,POLR2D,NCOA6,ZNF335,H3C6,KDM6A
672	REACTOME_PTK6_REGULATES_PROTEINS_INVOLVED_IN_RNA_PROCESSING	0.171171	0.313079	0.715431	1.3141	94	4	KHDRBS1,PTK6,SFPQ
673	REACTOME_ERBB2_ACTIVATES_PTK6_SIGNALING	0.126263	0.253944	0.527293	1.31385	74	12	EREG,NRG2,EGFR,PTK6,EGF,ERBB2,BTC,HBEGF
674	REACTOME_REGULATION_OF_MRNA_STABILITY_BY_PROTEINS_THAT_BIND_AU_RICH_ELEMENTS	0.0995025	0.21459	0.347715	1.31296	79	85	PRKCD,ZFP36,HSPA1A,EIF4G1,KHSRP,TNFSF13,PSMA6,MAPKAPK2,ELAVL1,AKT1,PSMD3,ZFP36L1,PSMB9,PABPC1,XRN1,PSMB10,MAPK14,HNRNPD,PSMF1,PSMB8,PSME3,PSME2,EXOSC6
675	REACTOME_METABOLISM_OF_NITRIC_OXIDE_NOS3_ACTIVATION_AND_REGULATION	0.1424	0.276061	0.503694	1.31283	88	14	SPR,WASL,AKT1,DNM2,CAV1
676	REACTOME_REGULATION_OF_GENE_EXPRESSION_IN_LATE_STAGE_BRANCHING_MORPHOGENESIS_PANCREATIC_BUD_PRECURSOR_CELLS	0.1424	0.276061	0.50351	1.31235	88	14	HES1,CREBBP,EP300,KAT2B,MAML2,NOTCH1
677	REACTOME_TRANSCRIPTIONAL_REGULATION_OF_TESTIS_DIFFERENTIATION	0.142329	0.276061	0.776792	1.31209	76	3	SOX9,AMH
678	REACTOME_DOWNSTREAM_SIGNALING_OF_ACTIVATED_FGFR4	0.145768	0.280564	0.481982	1.31123	92	16	GRB2,SHC1,FGF1,HRAS,KRAS,PIK3CA
679	REACTOME_DISEASES_OF_MITOTIC_CELL_CYCLE	0.12	0.246897	0.397948	1.31072	83	38	CDKN1C,CCND1,CCND3,UBE2S,CDK6,FZR1,CDKN1A,CCND2,CDKN1B
680	REACTOME_CASPASE_MEDIATED_CLEAVAGE_OF_CYTOSKELETAL_PROTEINS	0.144312	0.278762	0.535448	1.31035	84	11	GSN,ADD1,VIM,PLEC,SPTAN1,CASP7,DBNL,GAS2
681	REACTOME_PKA_MEDIATED_PHOSPHORYLATION_OF_KEY_METABOLIC_FACTORS	0.181982	0.327202	0.712971	1.30959	100	4	PRKACA,PRKACB,MLXIPL
682	REACTOME_RHO_GTPASES_ACTIVATE_RHOTEKIN_AND_RHOPHILINS	0.163823	0.304316	0.600741	1.30871	95	7	RHOB,RTKN,RHPN2,RHOC
683	REACTOME_SUMOYLATION	0.0557987	0.145333	0.315377	1.30845	50	175	PML,TRIM28,TP53,RELA,CBX4,MRTFA,RARA,SP100,HIPK2,PIAS4,PHC2,NFKBIA,TFAP2A,SAFB,POM121C,MBD1,RANGAP1,CREBBP,NFKB2,EP300,VDR,DNMT1,RXRA,MDM2,CTBP1,HDAC7,RING1,NCOA1,H4C4,HERC2,DNMT3A,NUP188,CDKN2A,NR3C1,HIC1,ESR1,CBX5,NCOA2,NUP62,CBX8,NR1H2,PPARA,SATB2,THRA
684	REACTOME_SYNTHESIS_OF_DOLICHYL_PHOSPHATE	0.164855	0.304864	0.640497	1.30809	90	6	NUS1,DOLPP1,DHDDS,MVD,DOLK
685	REACTOME_MISCELLANEOUS_TRANSPORT_AND_BINDING_EVENTS	0.139394	0.272733	0.444474	1.30744	91	23	LRRC8A,DMTN,LRRC8C,ADD1,SLC66A1,NIPAL4
686	REACTOME_DIGESTION_OF_DIETARY_LIPID	0.121324	0.248126	0.848164	1.30702	65	2	CEL,PNLIPRP3
687	REACTOME_CONSTITUTIVE_SIGNALING_BY_LIGAND_RESPONSIVE_EGFR_CANCER_VARIANTS	0.1493	0.28397	0.462215	1.30596	95	19	GRB2,SHC1,EGFR,HRAS,EGF,CBL,KRAS,PIK3CA
688	REACTOME_MTOR_SIGNALLING	0.127424	0.255848	0.390442	1.30566	91	40	EIF4G1,AKT1S1,AKT1,RRAGC,RRAGD,STK11,RRAGA,RHEB,MTOR,RPTOR,EEF2K,LAMTOR1,AKT2,MLST8,CAB39,PPM1A
689	REACTOME_NOTCH1_INTRACELLULAR_DOMAIN_REGULATES_TRANSCRIPTION	0.106412	0.225113	0.381106	1.30557	77	46	HDAC9,HES1,HDAC11,TBL1X,HDAC5,CREBBP,TLE4,EP300,TLE1,HDAC6,HDAC7,TLE3,KAT2B,MYC,MAML2,NOTCH1,NCOR2
690	REACTOME_DOWNREGULATION_OF_TGF_BETA_RECEPTOR_SIGNALING	0.14963	0.284261	0.425333	1.30547	100	26	PPP1R15A,SMURF1,PMEPA1,BAMBI,TGFB1,SMAD3,NEDD4L,TGFBR2,PPP1CA,SMURF2,STUB1,STRAP,XPO1
691	REACTOME_P75NTR_REGULATES_AXONOGENESIS	0.168478	0.309838	0.638141	1.30327	92	6	ARHGDIA,RTN4R,NGFR,RTN4
692	REACTOME_NRAGE_SIGNALS_DEATH_THROUGH_JNK	0.114024	0.236108	0.3695	1.30265	86	55	ARHGEF18,TRIO,ARHGEF40,ARHGEF37,ARHGEF10L,VAV2,AKAP13,VAV1,ITSN1,FGD2,ABR,PLEKHG2,ARHGEF1,NGFR,ARHGEF16,FGD1,ARHGEF11,ARHGEF5
693	REACTOME_SHC_MEDIATED_CASCADE_FGFR3	0.176068	0.319421	0.561978	1.29971	102	9	GRB2,SHC1,FGF1,HRAS,KRAS
694	REACTOME_BUTYROPHILIN_BTN_FAMILY_INTERACTIONS	0.187919	0.336003	0.576923	1.2992	111	8	XDH,PPL,BTN3A1,BTN3A3,BTN3A2
695	REACTOME_TP53_REGULATES_TRANSCRIPTION_OF_DEATH_RECEPTORS_AND_LIGANDS	0.141414	0.275269	0.520917	1.29796	83	12	TP53,TNFRSF10B,TNFRSF10A,TNFRSF10C
696	REACTOME_DOWNSTREAM_SIGNALING_OF_ACTIVATED_FGFR3	0.159875	0.298553	0.477005	1.29769	101	16	GRB2,SHC1,FGF1,HRAS,KRAS,PIK3CA
697	REACTOME_PD_1_SIGNALING	0.1584	0.296724	0.486777	1.2973	98	15	CD274,CSK,PDCD1LG2,HLA-DPB1
698	REACTOME_ALK_MUTANTS_BIND_TKIS	0.143098	0.27708	0.519651	1.29481	84	12	FN1,STRN,PPM1B,EIF2AK3,CLTC
699	REACTOME_SHC_MEDIATED_CASCADE_FGFR1	0.179487	0.324299	0.559768	1.2946	104	9	GRB2,SHC1,FGF1,HRAS,KRAS
700	REACTOME_NOTCH2_INTRACELLULAR_DOMAIN_REGULATES_TRANSCRIPTION	0.181197	0.326519	0.559287	1.29348	105	9	NOTCH2,HES1,EP300,MAML2,MAML1,MAMLD1
701	REACTOME_MET_ACTIVATES_PTPN11	0.196396	0.345409	0.704176	1.29343	108	4	GRB2,MET,GAB1
702	REACTOME_SUPPRESSION_OF_APOPTOSIS	0.173913	0.316851	0.632818	1.2924	95	6	RNF213,MAPK3,MAPK1,GSK3A,SFPQ
703	REACTOME_CREB_PHOSPHORYLATION	0.174061	0.316851	0.593043	1.29194	101	7	RPS6KA2,MAPKAPK2,RPS6KA1,RPS6KA3
704	REACTOME_SERINE_BIOSYNTHESIS	0.192953	0.340841	0.571499	1.28698	114	8	SERINC2,PSAT1,PHGDH,PSPH
705	REACTOME_TRIF_MEDIATED_PROGRAMMED_CELL_DEATH	0.194631	0.343429	0.571016	1.2859	115	8	TICAM1,RIPK1,FADD,RIPK3
706	REACTOME_NR1H2_NR1H3_REGULATE_GENE_EXPRESSION_TO_LIMIT_CHOLESTEROL_UPTAKE	0.189531	0.336966	0.656081	1.28564	104	5	RXRA,NR1H2,RXRB
707	REACTOME_DEFECTIVE_CHST14_CAUSES_EDS_MUSCULOCONTRACTURAL_TYPE	0.203604	0.354218	0.699902	1.28558	112	4	CHST14,CSPG4,VCAN
708	REACTOME_SYNTHESIS_OF_IP2_IP_AND_INS_IN_THE_CYTOSOL	0.165017	0.304864	0.503301	1.28531	99	13	ISYNA1,INPP5A,INPP4A,SYNJ1,INPP1,INPP4B,MTMR7
709	REACTOME_SCAVENGING_BY_CLASS_A_RECEPTORS	0.189744	0.336966	0.554647	1.28275	110	9	COL4A2,FTH1,COL4A1,COL1A1,APOB,APOE,CALR
710	REACTOME_RUNX3_REGULATES_WNT_SIGNALING	0.199664	0.348493	0.569547	1.28259	118	8	CCND1,TCF7L1,TCF7L2,MYC,RUNX3,CTNNB1,TCF7
711	REACTOME_GLYCOSPHINGOLIPID_METABOLISM	0.134286	0.266101	0.389187	1.28186	93	38	CTSA,SMPD1,ARSJ,STS,ARSA,ESYT1,ARSI,SUMF2,CPTP,NEU1,GLB1L
712	REACTOME_METABOLISM_OF_FAT_SOLUBLE_VITAMINS	0.146589	0.281472	0.397843	1.28174	100	33	AGRN,LRP10,LDLR,HSPG2,GPC6,SDC1,SDC3,VKORC1L1,LRP1,SDC4,LRP12,GPC4,GPC1,LRP8,APOB,GPC2,APOE,RETSAT
713	REACTOME_BETA_CATENIN_PHOSPHORYLATION_CASCADE	0.166139	0.306587	0.461962	1.27828	104	17	AXIN1,PPP2R1A,PPP2CB,PPP2R5B,PPP2R5A,CSNK1A1,AMER1,FRAT2,PPP2R5D,CTNNB1,PPP2R5E
714	REACTOME_CRMPS_IN_SEMA3A_SIGNALING	0.171617	0.313464	0.500416	1.27794	103	13	PLXNA1,NRP1,PLXNA2,FYN,CDK5R1,DPYSL2,SEMA3A,PLXNA3
715	REACTOME_THE_NLRP3_INFLAMMASOME	0.159933	0.298553	0.51272	1.27754	94	12	RELA,HMOX1,APP,NFKB2,NFKB1,PYCARD,CASP1,PANX1,TXNIP
716	REACTOME_NEF_MEDIATED_CD4_DOWN_REGULATION	0.191453	0.338935	0.552051	1.27675	111	9	AP2A1,AP2A2,AP2M1,ARF1,AP2S1
717	REACTOME_SARS_COV_2_INFECTION	0.122898	0.250618	0.348963	1.27557	94	68	PARP14,PARP10,PARP9,MGAT4B,PRKCSH,MGAT1,ST3GAL1,FURIN,MOGS,MAN1B1,CHMP4B,ST6GALNAC2,TMPRSS2,ST3GAL4,UVRAG,CHMP7,ST6GALNAC4,PARP8
718	REACTOME_ERBB2_REGULATES_CELL_MOTILITY	0.176	0.319421	0.48854	1.27333	109	14	EREG,NRG2,DIAPH1,EGFR,EGF,ERBB2,BTC,HBEGF
719	REACTOME_RNA_POLYMERASE_II_TRANSCRIPTION	0.001998	0.0208706	0.281027	1.27285	1	1211	JUN,NR1D1,STAT1,PML,BBC3,PRDM1,JUNB,PRKACA,TRIM28,SESN2,GADD45A,TP53,HDAC9,SERPINE1,CEBPB,SMARCA4,CCN2,FOS,G6PD,RELA,CBX4,GATAD2A,MYL9,GTF2F1,RARA,SNRPB,SOX9,PPARD,CCND1,CDKN2B,LIFR,HIPK2,BCL2L14,CSF2,RNPS1,MMP13,ESRRA,NOTCH2,TNKS1BP1,CSNK2A2,ABL1,GAMT,KMT2E,TNFRSF10B,THBS1,HES1,ITGA5,PAF1,CTDP1,HDAC11,GATAD2B,IRAK1,H2BC21,NBN,ZNF710,NR4A1,CBX6,PHC2,KLF4,PPM1D,PSMA6,SMARCC1,SOX2,POLR2A,TBL1X,CNOT…
720	REACTOME_RHO_GTPASES_ACTIVATE_IQGAPS	0.171212	0.313079	0.431532	1.26937	112	23	ACTG1,ACTB,CDH1,TUBB2A,TUBB4B,TUBB6,TUBA3D,CLIP1,MEN1,CTNNB1
721	REACTOME_ACTIVATION_OF_NMDA_RECEPTORS_AND_POSTSYNAPTIC_EVENTS	0.134289	0.266101	0.351147	1.26908	102	64	PRKACA,RPS6KA2,TUBB2A,SRC,CASK,PRKX,GRIN3A,HRAS,CAMKK2,PDPK1,RPS6KA1,TUBB4B,MAPK3,TUBB6,KRAS,PRKAR1B,DLG1,APBA1,PPM1F,RPS6KA3,RASGRF1,MAPK1,TUBA3D,ARHGEF7,CAMK4,CAMK2G,PRKAB1,PRKACB,CAMK2D,PRKAR2B
722	REACTOME_APOPTOSIS_INDUCED_DNA_FRAGMENTATION	0.173175	0.315951	0.518518	1.26892	101	11	H1-0,KPNB1,H1-4,DFFB
723	REACTOME_MET_RECEPTOR_ACTIVATION	0.197782	0.347088	0.75058	1.26782	106	3	SPINT1,MET,SPINT2
724	REACTOME_PRE_NOTCH_PROCESSING_IN_THE_ENDOPLASMIC_RETICULUM	0.199275	0.348493	0.620396	1.26703	109	6	NOTCH2,NOTCH3,NOTCH1,POFUT1
725	REACTOME_TRANSPORT_OF_SMALL_MOLECULES	0.0182371	0.0647529	0.285347	1.26684	17	532	SLC15A3,PRKACA,ATP6V0D1,GNB2,ATP13A2,LSR,SLC7A11,MLKL,FTH1,AP2A1,AP2A2,LDLR,SLCO4A1,CLTA,SLC4A2,LRRC8A,P4HB,SLC9A1,SLC38A5,SCARB1,SLC5A1,LIPG,GNB4,DMTN,GNB1,LRRC8C,GNG4,SLC26A4,PSMA6,LMF2,SLC43A2,PCSK6,SLC25A6,SLC39A3,SLC12A4,LMF1,GNAS,ADD1,RIPK1,SLC35D2,FURIN,HMOX1,SLC2A6,ATP6AP1,SLC16A3,PSMD3,SLC35A2,ANO7,HEPH,ABCF1,PSMB9,SLC27A1,NPC1,PHB2,LDLRAP1,BMP1,MBTPS1,SLC9A7,PSMB10,MCOLN1,ATP6V0E2,ATP11…
726	REACTOME_HYALURONAN_METABOLISM	0.1792	0.324299	0.474384	1.26427	111	15	SLC9A1,CHP1,HAS2,HAS3,GUSB
727	REACTOME_UB_SPECIFIC_PROCESSING_PROTEASES	0.0809628	0.18633	0.304174	1.2631	73	177	IFIH1,DDX58,USP18,TP53,KEAP1,USP42,USP11,H2BC21,PSMA6,USP22,BIRC3,NFKBIA,RIPK1,TADA2B,PSMD3,PSMB9,AXIN1,SNX3,USP5,FKBP8,RCE1,TAB1,USP25,PSMB10,RHOT1,SMAD3,CYLD,H2BC7,MDM2,PSMF1,ADRB2,H2BC6,TRRAP,GATA3,USP7,USP33,PSMB8,USP2,PSME3,USP20,PSME2,USP19
728	REACTOME_JNK_C_JUN_KINASES_PHOSPHORYLATION_AND_ACTIVATION_MEDIATED_BY_ACTIVATED_HUMAN_TAK1	0.186441	0.3341	0.432526	1.26182	120	22	IRAK1,IRAK2,TAB1,NOD2,TAB2,TAB3,NOD1,MAP2K7,RIPK2
729	REACTOME_HDL_REMODELING	0.214801	0.367352	0.643386	1.26076	118	5	LIPG,PLTP,ABCG1,APOE
730	REACTOME_ACTIVATION_OF_RAS_IN_B_CELLS	0.218412	0.371161	0.641835	1.25772	120	5	RASGRP3,HRAS,KRAS,RASGRP1
731	REACTOME_IRAK2_MEDIATED_ACTIVATION_OF_TAK1_COMPLEX	0.199664	0.348493	0.525294	1.25768	118	10	IRAK2,TAB1,TAB2,TAB3
732	REACTOME_NOTCH3_ACTIVATION_AND_TRANSMISSION_OF_SIGNAL_TO_THE_NUCLEUS	0.186364	0.3341	0.427122	1.2564	122	23	APH1A,JAG1,YBX1,WWP2,NOTCH3,EGFR,EGF,NCSTN,NEURL1B
733	REACTOME_GLYCOGEN_STORAGE_DISEASES	0.1888	0.336829	0.481916	1.25607	117	14	GYS1,G6PC3,NHLRC1,GAA
734	REACTOME_REGULATION_OF_GENE_EXPRESSION_BY_HYPOXIA_INDUCIBLE_FACTOR	0.203419	0.354218	0.542815	1.25539	118	9	CITED2,CREBBP,EP300,VEGFA
735	REACTOME_ACYL_CHAIN_REMODELLING_OF_PI	0.208054	0.360016	0.522531	1.25106	123	10	MBOAT7,PLA2G4C,PLA2G4E
736	REACTOME_NEUROTRANSMITTER_CLEARANCE	0.213768	0.367143	0.612509	1.25093	117	6	ACHE,ALDH2,COMT
737	REACTOME_VITAMINS	0.222022	0.375317	0.636902	1.24806	122	5	CYP24A1,CYP26A1,CYP26B1
738	REACTOME_PERK_REGULATES_GENE_EXPRESSION	0.179562	0.324299	0.390161	1.24698	122	31	ATF3,CEBPB,KHSRP,DDIT3,EIF2AK3,EXOSC6
739	REACTOME_SYNTHESIS_OF_PE	0.214765	0.367352	0.520639	1.24653	127	10	LPIN1,ETNK2,PCYT2,LPIN2
740	REACTOME_ELECTRIC_TRANSMISSION_ACROSS_GAP_JUNCTIONS	0.214418	0.367352	0.737146	1.24513	115	3	PANX2,PANX1,GJC1
741	REACTOME_SIGNALING_BY_NOTCH1_PEST_DOMAIN_MUTANTS_IN_CANCER	0.154856	0.29076	0.35372	1.24498	117	54	HDAC9,HES1,HDAC11,APH1A,TBL1X,JAG1,HDAC5,CREBBP,EP300,HDAC6,HDAC7,KAT2B,NCSTN,NEURL1B,MYC,MAML2,NOTCH1,NCOR2
742	REACTOME_POSITIVE_EPIGENETIC_REGULATION_OF_RRNA_EXPRESSION	0.139949	0.272952	0.336539	1.24497	109	75	MYO1C,GATAD2A,ACTB,GATAD2B,H2BC21,MTA2,POLR1A,BAZ1B,SMARCA5,EHMT2,RBBP7,EP300,H2BC7,H4C4,H2BC6,H3C13,KAT2B
743	REACTOME_BETA_DEFENSINS	0.245045	0.402824	0.677288	1.24404	135	4	TLR2,DEFB4A
744	REACTOME_ALTERNATIVE_COMPLEMENT_ACTIVATION	0.218115	0.371048	0.735473	1.2423	117	3	C3,CFB,CFD
745	REACTOME_FREE_FATTY_ACIDS_REGULATE_INSULIN_SECRETION	0.221477	0.374893	0.516912	1.23761	131	10	PLCB3,GNA15,GNA11
746	REACTOME_CGMP_EFFECTS	0.207131	0.35919	0.505702	1.23756	121	11	KCNMA1,PDE9A,ITPR1,PDE5A,PRKG1,PDE1A
747	REACTOME_HYALURONAN_UPTAKE_AND_DEGRADATION	0.208829	0.360582	0.505417	1.23686	122	11	SLC9A1,CHP1,GUSB,LYVE1,CD44,HEXA,HEXB
748	REACTOME_REGULATION_OF_CYTOSKELETAL_REMODELING_AND_CELL_SPREADING_BY_IPP_COMPLEX_COMPONENTS	0.220137	0.373699	0.567618	1.23655	128	7	ACTN1,PARVA,PXN,TESK1
749	REACTOME_TRANSPORT_TO_THE_GOLGI_AND_SUBSEQUENT_MODIFICATION	0.105856	0.224387	0.301371	1.236	93	162	CAPZB,B4GALT5,KDELR1,MGAT4B,MGAT3,ARF3,LMAN2,MGAT1,MAN1C1,DYNC1H1,TRAPPC1,CTSZ,TUBB2A,NAPA,FUCA1,TRAPPC9,GBF1,PPP6R1,ARF5,BET1L,B4GALT2,SEC24C,CSNK1D,SEC16A,GOSR1,SPTBN1,MAN1A1,RAB1B,ST3GAL4,DYNLL2,ANK1,SPTBN5,TUBB4B,FUT3,CNIH2,SPTAN1,GORASP1,TUBB6,COPZ2,ARFGAP1,DYNC1LI1,TRAPPC10,TUBA3D,AREG,SPTBN2,ARF1,TGFA,SEC24A
750	REACTOME_BUDDING_AND_MATURATION_OF_HIV_VIRION	0.196165	0.345379	0.397386	1.23507	132	28	MVB12A,VPS37B,VPS37C,UBAP1,CHMP4B,NEDD4L,CHMP7,VPS4A
751	REACTOME_IKK_COMPLEX_RECRUITMENT_MEDIATED_BY_RIP1	0.208012	0.360016	0.423205	1.23462	134	22	TICAM1,UBE2D2,BIRC3,RIPK1
752	REACTOME_RND2_GTPASE_CYCLE	0.16989	0.312078	0.367451	1.23319	122	41	ARHGAP1,PRAG1,EPHA2,CKAP4,SCRIB,ARHGAP35,CAV1,VANGL1,FNBP1,GOLGA3,TNFAIP1,PLXND1
753	REACTOME_SIGNALING_BY_NOTCH2	0.199115	0.348493	0.396018	1.23081	134	28	NOTCH2,HES1,APH1A,JAG1,MDK,EP300,NCSTN,NEURL1B,MAML2
754	REACTOME_NEGATIVE_REGULATION_OF_FGFR2_SIGNALING	0.209302	0.361013	0.427272	1.23073	134	21	GRB2,SRC,PPP2R1A,SPRY2,FGF1,PPP2CB,CBL,MAPK3,MAPK1,MKNK1
755	REACTOME_ERYTHROPOIETIN_ACTIVATES_PHOSPHOLIPASE_C_GAMMA_PLCG	0.230072	0.385689	0.602518	1.23052	126	6	IRS2,JAK2,LYN
756	REACTOME_ZINC_TRANSPORTERS	0.210438	0.362196	0.493575	1.22984	124	12	SLC39A3,SLC39A7,SLC39A14,SLC30A5,SLC30A1
757	REACTOME_TNFR2_NON_CANONICAL_NF_KB_PATHWAY	0.152585	0.287839	0.328731	1.22919	120	81	TNFSF13B,TNFRSF12A,TNFSF13,RELB,LTBR,TNFRSF1A,PSMA6,BIRC3,TRAF3,TNFSF9,PSMD3,PSMB9,MAP3K14,UBE2M,NFKB2,PSMB10
758	REACTOME_GLUCONEOGENESIS	0.208824	0.360582	0.396895	1.2285	141	27	PCK2,SLC25A1,SLC25A11,G6PC3,PC,SLC37A1,FBP1,GPI
759	REACTOME_G2_M_DNA_REPLICATION_CHECKPOINT	0.249097	0.407507	0.626744	1.22815	137	5	WEE1,PKMYT1,CCNB1,CDK1
760	REACTOME_SIGNALING_BY_FGFR2	0.159061	0.297616	0.342584	1.22797	121	60	GTF2F1,PTBP1,GRB2,SHC1,POLR2A,RBFOX2,SRC,PPP2R1A,SPRY2,FGF1,PPP2CB,HRAS,HNRNPM,POLR2D,CBL,MAPK3,TIAL1,KRAS,PIK3CA,MAPK1,MKNK1
761	REACTOME_VLDL_CLEARANCE	0.231054	0.386931	0.726909	1.22784	124	3	LSR,VLDLR,APOB
762	REACTOME_AKT_PHOSPHORYLATES_TARGETS_IN_THE_NUCLEUS	0.239933	0.397258	0.512509	1.22707	142	10	NR4A1,AKT1,FOXO3,RPS6KB2,AKT2,FOXO4,AKT3
763	REACTOME_EXTRINSIC_PATHWAY_OF_FIBRIN_CLOT_FORMATION	0.216912	0.369783	0.795982	1.22661	117	2	F3,TFPI
764	REACTOME_DNA_DOUBLE_STRAND_BREAK_RESPONSE	0.160365	0.299014	0.339377	1.22654	122	64	TP53,EYA2,PPP5C,ABL1,PIAS4,H2BC21,NBN,BAZ1B,KDM4B,SMARCA5,H2BC7,H4C4,HERC2,H2BC6
765	REACTOME_TP53_REGULATES_TRANSCRIPTION_OF_CASPASE_ACTIVATORS_AND_CASPASES	0.217172	0.369835	0.492159	1.22631	128	12	TP53,APAF1,CASP10,CASP1,PIDD1
766	REACTOME_INTESTINAL_ABSORPTION	0.220588	0.374071	0.794261	1.22396	119	2	SLC5A1,NPC1L1
767	REACTOME_APOBEC3G_MEDIATED_RESISTANCE_TO_HIV_1_INFECTION	0.252708	0.412696	0.624154	1.22308	139	5	HMGA1,APOBEC3G,BANF1
768	REACTOME_STRIATED_MUSCLE_CONTRACTION	0.221538	0.374893	0.426989	1.22241	143	20	TPM1,VIM,TPM4,TNNT1,TNNT2,TMOD3,TTN,TPM2,TNNI2
769	REACTOME_RECEPTOR_TYPE_TYROSINE_PROTEIN_PHOSPHATASES	0.227504	0.382977	0.499238	1.22174	133	11	PPFIBP1,PTPRF,PPFIA1,PTPRS,PPFIA3
770	REACTOME_TP53_REGULATES_TRANSCRIPTION_OF_SEVERAL_ADDITIONAL_CELL_DEATH_GENES_WHOSE_SPECIFIC_ROLES_IN_P53_DEPENDENT_APOPTOSIS_REMAIN_UNCERTAIN	0.2144	0.367352	0.468087	1.22003	133	14	TP53,BCL2L14
771	REACTOME_MET_INTERACTS_WITH_TNS_PROTEINS	0.281081	0.442043	0.662113	1.21617	155	4	TNS3,MET,TNS4,ITGB1
772	REACTOME_ZINC_INFLUX_INTO_CELLS_BY_THE_SLC39_GENE_FAMILY	0.253356	0.412696	0.539951	1.21594	150	8	SLC39A3,SLC39A7,SLC39A14
773	REACTOME_TRANSPORT_OF_NUCLEOSIDES_AND_FREE_PURINE_AND_PYRIMIDINE_BASES_ACROSS_THE_PLASMA_MEMBRANE	0.244966	0.402824	0.507536	1.21516	145	10	SLC25A6,SLC29A2,SLC29A4,ARL2BP
774	REACTOME_GLUCOSE_METABOLISM	0.170455	0.312403	0.325126	1.21466	134	80	HK2,PRKACA,PCK2,PFKP,SLC25A1,HK1,SLC25A11,POM121C,G6PC3,PKM,PPP2R1A,PC,PFKFB3,SLC37A1,PPP2CB,PFKFB4,PFKL,NUP188,NUP62,FBP1,GPI
775	REACTOME_EPIGENETIC_REGULATION_OF_GENE_EXPRESSION	0.153025	0.288236	0.30923	1.21292	128	115	MYO1C,GATAD2A,ACTB,GATAD2B,H2BC21,JARID2,MTA2,POLR1A,BAZ1B,BAZ2A,SAP130,SMARCA5,EHMT2,RBBP7,EP300,DNMT1,ERCC2,H2BC7,H4C4,DNMT3A,H2BC6,H3C13,MBD2,KAT2B,PHF1,UBTF,UHRF1,AEBP2,H3C6,CHD3,TET3,SIRT1,SIN3B
776	REACTOME_DIGESTION_AND_ABSORPTION	0.253356	0.412696	0.538543	1.21277	150	8	SLC5A1,CEL,GUCY2C,MGAM
777	REACTOME_TP53_REGULATES_TRANSCRIPTION_OF_DNA_REPAIR_GENES	0.174707	0.317666	0.337966	1.21142	133	60	JUN,TP53,FOS,GTF2F1,CTDP1,POLR2A,SUPT5H,NELFB,ELL,CCNK,ERCC2,CDK9
778	REACTOME_ACETYLCHOLINE_NEUROTRANSMITTER_RELEASE_CYCLE	0.256711	0.416897	0.505394	1.21003	152	10	STXBP1,STX1A,RAB3A,PPFIA1,VAMP2,PPFIA3
779	REACTOME_DOPAMINE_RECEPTORS	0.248162	0.407117	0.784911	1.20955	134	2	DRD4,DRD2
780	REACTOME_RND1_GTPASE_CYCLE	0.189751	0.336966	0.360975	1.20712	136	40	EPSTI1,EPHA2,RND1,PLXNA1,ARHGAP35,CAV1,DSP,RRAS2,VANGL1,RASAL2,GRB7,TFRC,CPD,PKP4
781	REACTOME_NR1H2_NR1H3_REGULATE_GENE_EXPRESSION_LINKED_TO_GLUCONEOGENESIS	0.291892	0.455695	0.656707	1.20624	161	4	RXRA,NRIP1,RXRB
782	REACTOME_DOWNREGULATION_OF_ERBB2_SIGNALING	0.233824	0.389545	0.389631	1.20601	158	27	EREG,AKT1,NRG2,PTPN12,EGFR,EGF,ERBB2,RNF41,AKT2,PTPN18,ERBIN,STUB1,BTC,HBEGF,AKT3
783	REACTOME_PHASE_3_RAPID_REPOLARISATION	0.291892	0.455695	0.656331	1.20555	161	4	KCNQ1,KCNE3,KCNE1
784	REACTOME_N_GLYCAN_ANTENNAE_ELONGATION	0.249158	0.407507	0.481384	1.19946	147	12	B4GALT5,MGAT4B,B4GALT2,ST3GAL4,MGAT5,B4GALT3,B4GALT1
785	REACTOME_MATURATION_OF_SARS_COV_2_SPIKE_PROTEIN	0.235556	0.391615	0.390585	1.19882	158	26	MGAT4B,PRKCSH,MGAT1,ST3GAL1,MOGS,MAN1B1,ST6GALNAC2,ST3GAL4,ST6GALNAC4
786	REACTOME_NEGATIVE_REGULATION_OF_MET_ACTIVITY	0.233281	0.389278	0.424043	1.19811	149	19	GRB2,SH3KBP1,SH3GL1,PTPRJ,MET,CBL,PTPN1
787	REACTOME_ERYTHROPOIETIN_ACTIVATES_PHOSPHOINOSITIDE_3_KINASE_PI3K	0.252991	0.412696	0.517564	1.19699	147	9	IRS2,JAK2,LYN,PIK3CA,PIK3CD
788	REACTOME_CHREBP_ACTIVATES_METABOLIC_GENE_EXPRESSION	0.257679	0.417207	0.548628	1.19518	150	7	FASN,ACLY,ACACA,AGPAT1,MLXIPL
789	REACTOME_REGULATED_PROTEOLYSIS_OF_P75NTR	0.266553	0.42601	0.487014	1.19182	156	11	RELA,APH1A,NFKB1,NCSTN,NGFR
790	REACTOME_AMINO_ACID_TRANSPORT_ACROSS_THE_PLASMA_MEMBRANE	0.260479	0.420052	0.398702	1.1918	173	24	SLC7A11,SLC38A5,SLC43A2,SLC7A1,SLC3A2,SLC36A1,SLC7A5
791	REACTOME_FASL_CD95L_SIGNALING	0.304505	0.466752	0.648292	1.19078	168	4	CASP10,FADD,CASP8
792	REACTOME_CREB1_PHOSPHORYLATION_THROUGH_NMDA_RECEPTOR_MEDIATED_ACTIVATION_OF_RAS_SIGNALING	0.248062	0.407117	0.413172	1.19012	159	21	RPS6KA2,HRAS,PDPK1,RPS6KA1,MAPK3,KRAS,DLG1,RPS6KA3,RASGRF1,MAPK1,CAMK2G,CAMK2D,DLG2
793	REACTOME_FORMATION_OF_THE_BETA_CATENIN_TCF_TRANSACTIVATING_COMPLEX	0.189295	0.336966	0.330483	1.18954	144	62	SMARCA4,H2BC21,TCF7L1,TCF7L2,CREBBP,TLE4,EP300,TLE1,H2BC7,H4C4,TLE3,H2BC6,TRRAP,H3C13,BCL9L,MYC,KAT5,H3C6,PYGO2,PYGO1,H2AX,RUNX3,TLE2,MEN1
794	REACTOME_NEF_AND_SIGNAL_TRANSDUCTION	0.304505	0.466752	0.647547	1.18941	168	4	FYN,PAK2
795	REACTOME_HATS_ACETYLATE_HISTONES	0.17029	0.312403	0.305882	1.18792	140	108	ACTB,JADE2,TAF5L,H2BC21,USP22,BRD1,TADA2B,ATXN7L3,KAT6A,CREBBP,YEATS2,BRPF3,SAP130,RBBP7,RUVBL2,EP300,H2BC7,NCOA1,H4C4,H2BC6,TRRAP,H3C13,WDR5,HCFC1,KAT2B,KANSL1,NCOA2,PHF20,KAT5,MSL2,H3C6
796	REACTOME_SEROTONIN_NEUROTRANSMITTER_RELEASE_CYCLE	0.273345	0.434204	0.485131	1.18722	160	11	STXBP1,STX1A,RAB3A,PPFIA1,VAMP2,PPFIA3
797	REACTOME_INTERLEUKIN_12_FAMILY_SIGNALING	0.215924	0.36849	0.342972	1.18468	159	48	STAT1,CRLF1,CNN2,P4HB,JAK2,STAT3,SOD2,PITPNA,SERPINB2,CFL1,JAK1,PAK2,PSME2
798	REACTOME_ACTIVATED_NTRK2_SIGNALS_THROUGH_RAS	0.263248	0.42285	0.512109	1.18437	153	9	GRB2,SHC1,HRAS,KRAS,NTF4,SOS1
799	REACTOME_SIGNALING_BY_LRP5_MUTANTS	0.273567	0.434204	0.700836	1.1838	147	3	KREMEN1,LRP5,DKK1
800	REACTOME_RECYCLING_OF_BILE_ACIDS_AND_SALTS	0.259259	0.419344	0.475093	1.18378	153	12	RXRA,NCOA1,NCOA2,STARD5,SLC10A1,ABCC3,FABP6
801	REACTOME_HCMV_INFECTION	0.188612	0.336829	0.299644	1.18372	158	119	PML,MVB12A,TRIM28,VPS37B,VPS37C,DYNC1H1,TUBB2A,H2BC21,TBL1X,POM121C,UBAP1,CHMP4B,CHMP1A,RBBP7,NFKB1,H2BC7,EGFR,ELK1,DYNLL2,H4C4,H2BC6,H3C13,NUP188,CHMP7,VPS4A,TUBB4B,NUP62,TUBB6
802	REACTOME_FRUCTOSE_CATABOLISM	0.30991	0.473237	0.643844	1.18261	171	4	TKFC,GLYCTK,ALDOB
803	REACTOME_HDL_CLEARANCE	0.30991	0.473237	0.641569	1.17843	171	4	SCARB1,AMN,HDLBP
804	REACTOME_TRAFFICKING_OF_GLUR2_CONTAINING_AMPA_RECEPTORS	0.265993	0.425536	0.472709	1.17784	157	12	AP2A1,AP2A2,GRIP2,GRIP1,PICK1,AP2M1,AP2S1
805	REACTOME_MATURATION_OF_PROTEIN_3A	0.288591	0.452256	0.522952	1.17766	171	8	ST3GAL1,ST6GALNAC2,ST3GAL4,ST6GALNAC4,ST3GAL3
806	REACTOME_P75NTR_RECRUITS_SIGNALLING_COMPLEXES	0.267677	0.426535	0.472611	1.1776	158	12	IRAK1,SQSTM1,MYD88,NGFR,RIPK2
807	REACTOME_OREXIN_AND_NEUROPEPTIDES_FF_AND_QRFP_BIND_TO_THEIR_RESPECTIVE_RECEPTORS	0.212181	0.364806	0.878513	1.17485	107	1	NPFFR2
808	REACTOME_METABOLISM_OF_STEROIDS	0.19578	0.345078	0.294847	1.174	166	128	HELZ2,OSBP,FASN,PIAS4,TBL1X,KPNB1,SREBF2,SREBF1,CARM1,SCAP,FDXR,MBTPS1,ELOVL6,CREBBP,SEC24C,LSS,VDR,MVK,RXRA,NCOA1,ACACA,MTF1,CYP24A1,SP1,HSD11B2,CYP27A1,NCOA2,NCOA6,PPARA,HSD17B1,STARD3,STARD5,SLC10A1
809	REACTOME_NITRIC_OXIDE_STIMULATES_GUANYLATE_CYCLASE	0.2624	0.422726	0.440353	1.17358	163	15	KCNMA1,PDE9A,ITPR1,PDE5A,PRKG1,GUCY1B1,PDE1A
810	REACTOME_SYNTHESIS_OF_16_20_HYDROXYEICOSATETRAENOIC_ACIDS_HETE	0.277174	0.437949	0.573667	1.1716	152	6	CYP4A11,CYP1A1,CYP2U1,CYP2C9
811	REACTOME_DARPP_32_EVENTS	0.26	0.419862	0.409105	1.17121	168	20	PRKACA,PPP2R1A,PPP2CB,PPP3R1,PPP1CA,PPP3CA,PRKAR1B,PPP2R5D,PRKACB,PPP3CB,PRKAR2B
812	REACTOME_NEGATIVE_FEEDBACK_REGULATION_OF_MAPK_PATHWAY	0.277174	0.437949	0.573419	1.17109	152	6	MAP2K2,MAPK3,MAPK1,MAP2K1
813	REACTOME_NUCLEAR_ENVELOPE_NE_REASSEMBLY	0.20232	0.352746	0.320572	1.16977	156	67	LMNA,EMD,TUBB2A,KPNB1,RCC1,PPP2R1A,RANGAP1,LEMD2,CHMP4B,PPP2R2A,CC2D1B,ANKLE2,NUP188,CHMP7,SIRT2,VPS4A,TUBB4B,NUP62,TUBB6
814	REACTOME_TERMINATION_OF_O_GLYCAN_BIOSYNTHESIS	0.263077	0.42285	0.407727	1.16727	170	20	ST3GAL1,MUC20,ST6GALNAC2,ST3GAL4,MUC16,ST6GALNAC4,MUC21,MUC15,ST3GAL3
815	REACTOME_COLLAGEN_BIOSYNTHESIS_AND_MODIFYING_ENZYMES	0.233288	0.389278	0.339618	1.16344	170	46	COL4A2,P4HB,P3H2,COL17A1,PLOD3,PLOD1,BMP1,COL9A2,COL18A1,COL16A1,COLGALT1,COL27A1,TLL2,COL8A1,COL4A1,COL1A1,SERPINH1,CRTAP,P3H3,COL12A1
816	REACTOME_VITAMIN_D_CALCIFEROL_METABOLISM	0.290598	0.45496	0.502603	1.16239	169	9	PIAS4,VDR,CYP24A1,LGMN,UBE2I
817	REACTOME_INLB_MEDIATED_ENTRY_OF_LISTERIA_MONOCYTOGENES_INTO_HOST_CELL	0.2752	0.436365	0.445728	1.16175	171	14	GRB2,SH3KBP1,SH3GL1,MET,CBL
818	REACTOME_NCAM1_INTERACTIONS	0.271318	0.43191	0.402835	1.16034	174	21	COL4A2,AGRN,ARTN,COL9A2,CACNB1,PSPN,PRNP,COL4A1,CACNB2,CACNB3,NRTN
819	REACTOME_TRANSLESION_SYNTHESIS_BY_Y_FAMILY_DNA_POLYMERASES_BYPASSES_LESIONS_ON_DNA_TEMPLATE	0.243626	0.401721	0.349494	1.16028	171	39	ISG15,TRIM25,UBE2L6,NPLOC4,UBA7
820	REACTOME_MHC_CLASS_II_ANTIGEN_PRESENTATION	0.204573	0.35552	0.29891	1.15993	169	103	CTSD,CAPZB,AP1M1,CTSA,AP2A1,AP2A2,CLTA,AP1B1,DYNC1H1,TUBB2A,ACTR1B,DNM2,SEC24C,RILP,KLC1,DYNLL2,CD74,TUBB4B,HLA-DPB1,KLC2,TUBB6,CTSF,CTSV,DYNC1LI1,AP2M1,TUBA3D,LGMN,SPTBN2,ARF1,SEC24A,KLC3,CLTC,KIF3C,DNM3,HLA-DQA2
821	REACTOME_ANTIGEN_PROCESSING_CROSS_PRESENTATION	0.215496	0.368149	0.301054	1.1589	177	95	TAP1,HLA-A,TAP2,TAPBP,NCF1,PSMA6,ITGB5,STX4,HLA-B,PSMD3,HLA-E,PSMB9,HLA-F,HLA-C,TLR2,PSMB10,PSMF1,MYD88,MRC2,PSMB8,PSME3,PSME2
822	REACTOME_SYNTHESIS_OF_PA	0.277286	0.437949	0.372709	1.15837	187	28	AGPAT2,AGPAT3,PLD2,LPCAT1,DDHD2,LPCAT4,LIPH,PLD6,GPAT3
823	REACTOME_VLDL_ASSEMBLY	0.303142	0.466731	0.684179	1.15566	163	3	P4HB,APOB,MTTP
824	REACTOME_LDL_REMODELING	0.303142	0.466731	0.684179	1.15566	163	3	P4HB,APOB,MTTP
825	REACTOME_KERATAN_SULFATE_DEGRADATION	0.296928	0.46084	0.530289	1.15523	173	7	GLB1L,GNS,HEXA,FMOD,HEXB,GALNS
826	REACTOME_TERMINATION_OF_TRANSLESION_DNA_SYNTHESIS	0.264317	0.423275	0.359224	1.15379	179	32	ISG15,TRIM25,UBE2L6,UBA7
827	REACTOME_UPTAKE_AND_ACTIONS_OF_BACTERIAL_TOXINS	0.291916	0.455695	0.381761	1.15332	194	25	EEF2,MAP2K2,MAP2K3,ANTXR2,FURIN,STX1A,MAP2K7
828	REACTOME_TRANSPORT_OF_INORGANIC_CATIONS_ANIONS_AND_AMINO_ACIDS_OLIGOPEPTIDES	0.225191	0.37948	0.311717	1.15314	176	75	SLC15A3,SLC7A11,SLC4A2,SLC9A1,SLC38A5,SLC26A4,SLC43A2,SLC12A4,SLC9A7,SLC7A1,SLC25A22,SLC8B1,SLC25A18,SLC34A2,SLC12A2,SLC26A11,SLC20A1,SLC3A2,SLC36A1,SLC7A5,SLC4A3,SLC12A7
829	REACTOME_FCERI_MEDIATED_NF_KB_ACTIVATION	0.22796	0.383208	0.31082	1.15212	180	74	CARD11,RELA,UBE2D2,PSMA6,NFKBIA,PSMD3,CDC34,PSMB9,TAB1,PSMB10,NFKB1,TAB2,BCL10,PSMF1,TAB3,PSMB8,LYN,PDPK1,PSME3,PSME2,MALT1
830	REACTOME_TRAF6_MEDIATED_IRF7_ACTIVATION_IN_TLR7_8_OR_9_SIGNALING	0.307047	0.469756	0.481075	1.15181	182	10	IRF7,IRAK1,MYD88
831	REACTOME_ORGANIC_ANION_TRANSPORTERS	0.300725	0.464494	0.56229	1.14836	165	6	SLC25A22,SLC25A18,SLC5A5,SLC25A10
832	REACTOME_LYSOSOME_VESICLE_BIOGENESIS	0.279001	0.440227	0.357151	1.14714	189	32	AP1M1,CLTA,AP1B1,CTSZ,DNM2,APP,ARRB1,AP4E1,GNS,ARF1,CLTC,CLTB,VAMP2
833	REACTOME_TP53_REGULATES_METABOLIC_GENES	0.241294	0.398691	0.303665	1.14663	193	85	SESN2,TP53,G6PD,MOV10,GSR,AKT1,TNRC6B,COX5A,RRAGC,RRAGD,YWHAG,TACO1,AGO2,RRAGA,RHEB,MTOR,DDIT4,RPTOR,TNRC6C,AGO1,LAMTOR1,GPI,AKT2,MLST8,YWHAH,TNRC6A
834	REACTOME_NEGATIVE_REGULATION_OF_ACTIVITY_OF_TFAP2_AP_2_FAMILY_TRANSCRIPTION_FACTORS	0.315436	0.478501	0.508991	1.14622	187	8	TFAP2A,KCTD1,TFAP2C,UBE2I,SUMO1,TFAP2E
835	REACTOME_TRANSLOCATION_OF_SLC2A4_GLUT4_TO_THE_PLASMA_MEMBRANE	0.237221	0.393578	0.319228	1.14523	180	61	ACTG1,MYO1C,ACTB,MYH9,TUBB2A,STX4,AKT1,YWHAG,ASPSCR1,RAB13,TUBB4B,RAB10,RAB14,TUBB6,EXOC7,SNAP23,AKT2,YWHAH,TBC1D1,TUBA3D,EXOC8
836	REACTOME_DEFECTIVE_CHSY1_CAUSES_TPBS	0.351351	0.517866	0.62345	1.14515	194	4	CSPG4,CHSY1,VCAN
837	REACTOME_CYTOCHROME_P450_ARRANGED_BY_SUBSTRATE_TYPE	0.25648	0.416897	0.334263	1.1451	187	46	POR,FDXR,CYP4A11,CYP4V2,RXRA,NCOA1,CYP1A1,CYP24A1,CYP2U1,CYP26A1,CYP27A1,NCOA2,CYP2C9,CYP2J2
838	REACTOME_TCR_SIGNALING	0.232893	0.389278	0.295189	1.14496	193	101	CARD11,RELA,UBE2D2,CSK,PSMA6,PTPRJ,NFKBIA,PSMD3,CDC34,PSMB9,INPP5D,PSMB10,VASP,ENAH,NFKB1,TAB2,BCL10,PSMF1,PAK2,PSMB8,PDPK1,PSME3,PSME2,HLA-DPB1,MALT1,RIPK2
839	REACTOME_DOWNSTREAM_SIGNALING_EVENTS_OF_B_CELL_RECEPTOR_BCR	0.234474	0.390225	0.306136	1.14066	184	78	CARD11,RELA,NFKBIE,NFATC1,PSMA6,RASGRP3,NFKBIA,PSMD3,PSMB9,PSMB10,NFKB1,NFKBIB,BCL10,PSMF1,HRAS,PPP3R1,PSMB8,PSME3,NFATC2,PSME2,MALT1,PPP3CA
840	REACTOME_ACTIVATION_OF_BAD_AND_TRANSLOCATION_TO_MITOCHONDRIA	0.2992	0.463027	0.427518	1.13937	186	15	AKT1,YWHAG,PPP3R1,AKT2,YWHAH,BID,BCL2
841	REACTOME_RUNX1_REGULATES_ESTROGEN_RECEPTOR_MEDIATED_TRANSCRIPTION	0.313406	0.476767	0.556452	1.13644	172	6	AXIN1,RUNX1,ESR1
842	REACTOME_LOSS_OF_FUNCTION_OF_SMAD2_3_IN_CANCER	0.324232	0.485896	0.521297	1.13564	189	7	TGFB1,SMAD3,TGFBR2
843	REACTOME_CELL_DEATH_SIGNALLING_VIA_NRAGE_NRIF_AND_NADE	0.242424	0.400149	0.306906	1.13541	191	72	ARHGEF18,APH1A,TRIO,ARHGEF40,ARHGEF37,ARHGEF10L,VAV2,AKAP13,VAV1,ITSN1,FGD2,SQSTM1,ABR,PLEKHG2,ARHGEF1,NCSTN,NGFR,ARHGEF16,BEX3,FGD1,ARHGEF11,ARHGEF5
844	REACTOME_VITAMIN_B2_RIBOFLAVIN_METABOLISM	0.317029	0.480013	0.555424	1.13434	174	6	SLC52A2,SLC52A3
845	REACTOME_HSF1_ACTIVATION	0.29351	0.457297	0.364837	1.1339	198	28	HSPA6,HSPA1A,DEDD2,HSPA1B,TNFRSF21,HSF1,DNAJB1,HDAC6
846	REACTOME_ION_CHANNEL_TRANSPORT	0.244418	0.402615	0.284812	1.13355	207	129	ATP6V0D1,ATP13A2,MLKL,RIPK1,ATP6AP1,ANO7,MCOLN1,ATP6V0E2,ATP11A,WNK2,RYR1,TTYH3,FXYD3,TPCN2,NEDD4L,WWP1,ATP8B2,ATP8B1,UNC80,TRPV3,ATP13A1,ATP2A2,SCNN1B,ATP12A,TRPM4,TCIRG1,ATP10A,ATP6V0A1,WNK1,ATP6V0B,MCOLN3,ANO4,CLCN7,FKBP1B,SCNN1A,TRPC1,OSTM1,ATP1A1,SLC9B1,WNK3,CLCA4,TRPV6,ATP1B1,ANO1,RIPK3,TRPC4AP,CAMK2G
847	REACTOME_TRIGLYCERIDE_METABOLISM	0.314371	0.477785	0.374411	1.13111	209	25	PRKACA,LPIN1,MGLL,CAV1,PPP1CA,LPIN2,DGAT2,PLIN3,LIPE,FABP6,PRKACB,LPIN3
848	REACTOME_HDACS_DEACETYLATE_HISTONES	0.267366	0.426461	0.315006	1.13008	203	61	GATAD2A,GATAD2B,H2BC21,TBL1X,RCOR1,MTA2,RBBP7,H2BC7,H4C4,H2BC6,H3C13,H3C6,CHD3,NCOR2
849	REACTOME_MITOPHAGY	0.29351	0.457297	0.363301	1.12913	198	28	CSNK2A2,PGAM5,SRC,TOMM40,PINK1,MAP1LC3A,SQSTM1
850	REACTOME_NEGATIVE_REGULATION_OF_TCF_DEPENDENT_SIGNALING_BY_WNT_LIGAND_ANTAGONISTS	0.332765	0.496374	0.517216	1.12675	194	7	KREMEN1,LRP5,WNT9A,DKK1,WNT5A
851	REACTOME_HSP90_CHAPERONE_CYCLE_FOR_STEROID_HORMONE_RECEPTORS_SHR_IN_THE_PRESENCE_OF_LIGAND	0.296097	0.460436	0.328564	1.12663	219	45	CAPZB,HSPA1A,DYNC1H1,TUBB2A,HSPA1B,DNAJB1,DYNLL2,FKBP5,HSPA2,NR3C1,TUBB4B,TUBB6
852	REACTOME_BETA_OXIDATION_OF_BUTANOYL_COA_TO_ACETYL_COA	0.351986	0.518075	0.574393	1.12557	194	5	ACADS,ACSM6,ECHS1
853	REACTOME_ABORTIVE_ELONGATION_OF_HIV_1_TRANSCRIPT_IN_THE_ABSENCE_OF_TAT	0.320493	0.484347	0.385384	1.12429	207	22	GTF2F1,CTDP1,POLR2A,SUPT5H,NELFB
854	REACTOME_FOXO_MEDIATED_TRANSCRIPTION_OF_OXIDATIVE_STRESS_METABOLIC_AND_NEURONAL_GENES	0.321538	0.485472	0.392691	1.12422	208	20	SREBF1,FBXO32,SOD2,SMAD3,FOXO3,NR3C1
855	REACTOME_CROSSLINKING_OF_COLLAGEN_FIBRILS	0.340125	0.504551	0.412596	1.12247	216	16	COL4A2,LOXL2,LOXL4,BMP1,PXDN,TLL2,COL4A1,COL1A1
856	REACTOME_MUCOPOLYSACCHARIDOSES	0.344652	0.509389	0.458378	1.12175	202	11	NAGLU,GUSB,GNS,IDUA,HGSNAT
857	REACTOME_NOTCH2_ACTIVATION_AND_TRANSMISSION_OF_SIGNAL_TO_THE_NUCLEUS	0.323077	0.485896	0.391118	1.11972	209	20	NOTCH2,APH1A,JAG1,MDK,NCSTN,NEURL1B
858	REACTOME_HYDROLYSIS_OF_LPC	0.341297	0.505823	0.513315	1.11825	199	7	PLA2G4C,PLA2G4E
859	REACTOME_RESPONSE_OF_MTB_TO_PHAGOCYTOSIS	0.324031	0.485896	0.387207	1.11532	208	21	RNF213,KPNB1,DUSP16,CORO1A,VPS33B,MAPK3,MAPK1,GSK3A,SFPQ
860	REACTOME_METABOLISM_OF_FOLATE_AND_PTERINES	0.3248	0.486294	0.42777	1.11494	202	14	FPGS,ALDH1L2,ALDH1L1,MTHFD1L,MTHFR,SHMT2
861	REACTOME_HIV_ELONGATION_ARREST_AND_RECOVERY	0.311307	0.47492	0.346387	1.11256	211	32	GTF2F1,CTDP1,POLR2A,SUPT5H,NELFB,ELL,CCNK,CDK9,POLR2D,NELFA
862	REACTOME_PI5P_REGULATES_TP53_ACETYLATION	0.336752	0.500007	0.481035	1.11251	196	9	TP53,EP300,PIP4K2B,PIP4K2C,PIP4K2A
863	REACTOME_FRUCTOSE_METABOLISM	0.342391	0.506513	0.543501	1.10999	188	6	TKFC,GLYCTK
864	REACTOME_TP53_REGULATES_TRANSCRIPTION_OF_ADDITIONAL_CELL_CYCLE_GENES_WHOSE_EXACT_ROLE_IN_THE_P53_PATHWAY_REMAIN_UNCERTAIN	0.333333	0.496762	0.385118	1.10931	214	21	TP53,TNKS1BP1,CNOT3,CNOT11
865	REACTOME_PLATELET_ADHESION_TO_EXPOSED_COLLAGEN	0.354027	0.51896	0.463112	1.1088	210	10	FYN,ITGA1,LYN,COL1A1,VWF,GP1BA,ITGB1,GP6
866	REACTOME_FRS_MEDIATED_FGFR4_SIGNALING	0.358234	0.521333	0.452604	1.10762	210	11	GRB2,FGF1,HRAS,KRAS
867	REACTOME_ENOS_ACTIVATION	0.359932	0.522847	0.451738	1.1055	211	11	SPR,AKT1,CAV1,CYGB,DDAH2,ZDHHC21,DDAH1
868	REACTOME_FGFRL1_MODULATION_OF_FGFR1_SIGNALING	0.398198	0.559148	0.601305	1.10448	220	4	SPRED1,FGFRL1,SPRED2
869	REACTOME_DOWNSTREAM_SIGNALING_OF_ACTIVATED_FGFR2	0.349684	0.515879	0.399014	1.1041	220	17	GRB2,SHC1,FGF1,HRAS,KRAS,PIK3CA
870	REACTOME_MEIOTIC_SYNAPSIS	0.300525	0.464494	0.313645	1.10393	228	54	SUN2,LMNA,H2BC21,TERF1,H2BC7,H4C4,H2BC6,TERF2IP,REC8,HSPA2
871	REACTOME_E3_UBIQUITIN_LIGASES_UBIQUITINATE_TARGET_PROTEINS	0.312253	0.475913	0.313715	1.10167	236	53	HLA-A,UBE2J2,UBE2D2,PAF1,PEX5,RNF40,PEX14,RNF152,RRAGA,H2BC7,BCL10,UBE2A,H2BC6,PEX10,TMEM129
872	REACTOME_STIMULI_SENSING_CHANNELS	0.301527	0.465287	0.29703	1.09881	236	75	MLKL,RIPK1,ANO7,MCOLN1,WNK2,RYR1,TTYH3,TPCN2,NEDD4L,WWP1,UNC80,TRPV3,SCNN1B,TRPM4,WNK1,MCOLN3,ANO4,CLCN7,FKBP1B,SCNN1A,TRPC1,OSTM1,SLC9B1,WNK3,CLCA4,TRPV6,ANO1,RIPK3,TRPC4AP
873	REACTOME_INLA_MEDIATED_ENTRY_OF_LISTERIA_MONOCYTOGENES_INTO_HOST_CELLS	0.347009	0.512402	0.475068	1.09871	202	9	CDH1,SRC,CTNNB1
874	REACTOME_ADVANCED_GLYCOSYLATION_ENDPRODUCT_RECEPTOR_SIGNALING	0.353535	0.518712	0.44047	1.09751	209	12	PRKCSH,APP,MAPK3,MAPK1
875	REACTOME_CHK1_CHK2_CDS1_MEDIATED_INACTIVATION_OF_CYCLIN_B_CDK1_COMPLEX	0.353135	0.518712	0.429559	1.09699	213	13	WEE1,YWHAG,YWHAH
876	REACTOME_ERCC6_CSB_AND_EHMT2_G9A_POSITIVELY_REGULATE_RRNA_EXPRESSION	0.323887	0.485896	0.317259	1.09586	239	48	GATAD2A,GATAD2B,H2BC21,MTA2,EHMT2,RBBP7,H2BC7,H4C4,H2BC6,H3C13
877	REACTOME_RUNX3_REGULATES_YAP1_MEDIATED_TRANSCRIPTION	0.36745	0.530004	0.486201	1.0949	218	8	CCN2,YAP1,WWTR1,TEAD3,RUNX3
878	REACTOME_HIGHLY_CALCIUM_PERMEABLE_NICOTINIC_ACETYLCHOLINE_RECEPTORS	0.357564	0.521333	0.818417	1.09449	181	1	CHRNB2
879	REACTOME_SYNTHESIS_SECRETION_AND_DEACYLATION_OF_GHRELIN	0.352137	0.518075	0.472819	1.09351	205	9	ACHE,KLF4
880	REACTOME_FRS_MEDIATED_FGFR3_SIGNALING	0.368421	0.530004	0.446464	1.09259	216	11	GRB2,FGF1,HRAS,KRAS
881	REACTOME_MRNA_EDITING_C_TO_U_CONVERSION	0.389892	0.550979	0.55728	1.09203	215	5	APOBEC3A,APOBEC3C,APOBEC3B
882	REACTOME_ROLE_OF_ABL_IN_ROBO_SLIT_SIGNALING	0.370805	0.530715	0.484177	1.09034	220	8	ABL1,CAP1,ABL2,SLIT2,CLASP1
883	REACTOME_INSULIN_RECEPTOR_RECYCLING	0.356923	0.521333	0.380279	1.08869	231	20	ATP6V0D1,ATP6AP1,INSR,ATP6V0E2,TCIRG1,ATP6V0A1,ATP6V0B
884	REACTOME_FRS_MEDIATED_FGFR1_SIGNALING	0.375212	0.533981	0.444325	1.08736	220	11	GRB2,FGF1,HRAS,KRAS,SOS1,FGFR1
885	REACTOME_TELOMERE_C_STRAND_SYNTHESIS_INITIATION	0.368687	0.530004	0.435989	1.08635	218	12	TERF1,CTC1,TERF2IP,TERF2
886	REACTOME_SYNTHESIS_OF_PROSTAGLANDINS_PG_AND_THROMBOXANES_TX	0.368687	0.530004	0.435958	1.08627	218	12	PTGS2,PRXL2B,PTGES2,TBXAS1,HPGD
887	REACTOME_REMOVAL_OF_AMINOTERMINAL_PROPEPTIDES_FROM_GAMMA_CARBOXYLATED_PROTEINS	0.421622	0.577957	0.591142	1.08581	233	4	GAS6,FURIN
888	REACTOME_INTERACTION_WITH_CUMULUS_CELLS_AND_THE_ZONA_PELLUCIDA	0.395307	0.556678	0.553229	1.0841	218	5	OVGP1,B4GALT1,ZP3,ADAM20,ADAM21
889	REACTOME_MOLYBDENUM_COFACTOR_BIOSYNTHESIS	0.369565	0.53016	0.530129	1.08268	203	6	GPHN,NFS1,MOCS1
890	REACTOME_RHOBTB2_GTPASE_CYCLE	0.372727	0.531854	0.367809	1.08192	245	23	ACTN1,ACTG1,DBN1,CUL3,RHOBTB2
891	REACTOME_ASPARAGINE_N_LINKED_GLYCOSYLATION	0.30621	0.46892	0.252594	1.08151	285	271	CAPZB,B4GALT5,RENBP,CTSA,KDELR1,GMDS,MGAT4B,MGAT3,ARF3,ALG2,LMAN2,PRKCSH,MGAT1,MAN1C1,DYNC1H1,TRAPPC1,CTSZ,TUBB2A,NAPA,ST3GAL1,FUCA1,TRAPPC9,GBF1,PPP6R1,ARF5,ALG12,NUS1,BET1L,MOGS,GMPPB,EDEM1,MLEC,B4GALT2,MAN1B1,NUDT14,SYVN1,SEC24C,CSNK1D,SEC16A,GOSR1,ST6GALNAC2,AMDHD2,SPTBN1,MAN1A1,RAB1B,ST3GAL4,DYNLL2,ANK1,NEU1,ST6GALNAC4,SPTBN5,DOLPP1,TUBB4B,FUT3,ST3GAL5,CNIH2,SPTAN1,AMFR,GORASP1,TUBB6,SLC35C1…
892	REACTOME_CD22_MEDIATED_BCR_REGULATION	0.430147	0.583305	0.701735	1.08137	233	2	LYN,PTPN6
893	REACTOME_CHYLOMICRON_REMODELING	0.430147	0.583305	0.701284	1.08068	233	2	APOB,APOE
894	REACTOME_REGULATION_OF_PTEN_LOCALIZATION	0.367521	0.530004	0.467264	1.08066	214	9	PML,USP7,XIAP,NEDD4
895	REACTOME_REACTIONS_SPECIFIC_TO_THE_COMPLEX_N_GLYCAN_SYNTHESIS_PATHWAY	0.382246	0.543033	0.527523	1.07736	210	6	FUCA1,FUT3
896	REACTOME_HIV_INFECTION	0.304207	0.466752	0.254643	1.07694	281	218	MVB12A,HLA-A,GTF2F1,AP1M1,AP2A1,AP2A2,VPS37B,VPS37C,AP1B1,CTDP1,HMGA1,PSMA6,POLR2A,KPNB1,SLC25A6,SUPT5H,NELFB,POM121C,TAF7,FURIN,RCC1,PSMD3,ELL,TAF4B,CCNK,PSMB9,UBAP1,RANGAP1,APOBEC3G,CHMP4B,PSMB10,PACS1,TAF4,ERCC2,FYN,CDK9,NEDD4L,PSMF1,NUP188,PAK2,PSMB8,CHMP7,POLR2D,PSME3,VPS4A,PSME2,TAF6
897	REACTOME_MYOGENESIS	0.371341	0.530816	0.369119	1.07684	240	22	ABL1,CDH2,MEF2D,MAPK14,TCF3,SPAG9,MEF2C,CTNNB1,MEF2A
898	REACTOME_DEADENYLATION_OF_MRNA	0.368263	0.530004	0.356252	1.07625	245	25	EIF4G1,TNKS1BP1,CNOT3,CNOT11,PABPC1
899	REACTOME_COPI_INDEPENDENT_GOLGI_TO_ER_RETROGRADE_TRAFFIC	0.342033	0.506448	0.318332	1.07592	248	42	CAPZB,GALNT2,DYNC1H1,TUBB2A,RAB6A,AGPAT3,DYNLL2,BICD1,TUBB4B,TUBB6,RAB6B,DYNC1LI1,TUBA3D
900	REACTOME_VITAMIN_B5_PANTOTHENATE_METABOLISM	0.387147	0.548062	0.395153	1.07501	246	16	PANK4,FASN,PANK2,COASY
901	REACTOME_FATTY_ACID_METABOLISM	0.323699	0.485896	0.265159	1.07434	279	145	PTGS2,ACADS,MID1IP1,PPARD,ELOVL7,ALOX15,FASN,NUDT19,TECR,ACSL1,ACLY,ECI1,SLC25A1,MAPKAPK2,PRXL2B,ELOVL6,CYP4A11,ACSM6,RXRA,MLYCD,ACACA,PTGES2,CYP1A1,CYP2U1,LTC4S,ACOT11,CRAT,ACBD4,ECHS1,SCD5,CPT1A,CYP2C9,MORC2,GPX4,CYP2J2
902	REACTOME_SODIUM_PROTON_EXCHANGERS	0.37094	0.530715	0.464153	1.07346	216	9	SLC9A1,SLC9A7,SLC9A4,SLC9A8
903	REACTOME_ENDOSOMAL_SORTING_COMPLEX_REQUIRED_FOR_TRANSPORT_ESCRT	0.357664	0.521333	0.335366	1.07185	244	31	MVB12A,VPS37B,VPS37C,UBAP1,CHMP4B,CHMP7,VPS4A
904	REACTOME_MIRO_GTPASE_CYCLE	0.394295	0.555739	0.475861	1.07161	234	8	RHOT1,RHOT2,MFN2
905	REACTOME_MAPK1_ERK2_ACTIVATION	0.382906	0.54349	0.461151	1.06652	223	9	MAP2K2,JAK2,JAK1,MAPK1,TYK2
906	REACTOME_DISEASES_OF_CARBOHYDRATE_METABOLISM	0.374456	0.533376	0.337764	1.06616	257	29	GYS1,NAGLU,G6PC3,NHLRC1,GAA,GUSB,GNS,IDUA,HGSNAT
907	REACTOME_SYNTHESIS_OF_SUBSTRATES_IN_N_GLYCAN_BIOSYTHESIS	0.374016	0.533221	0.301686	1.06184	284	54	RENBP,CTSA,GMDS,ST3GAL1,NUS1,GMPPB,NUDT14,ST6GALNAC2,AMDHD2,ST3GAL4,NEU1,ST6GALNAC4,DOLPP1,ST3GAL5,SLC35C1,PMM2,NAGK,ST6GALNAC6,ST3GAL3
908	REACTOME_RAS_PROCESSING	0.389394	0.550758	0.36067	1.06092	256	23	ZDHHC9,ABHD17A,RCE1,HRAS,BCL2L1,ABHD17B,KRAS
909	REACTOME_NOREPINEPHRINE_NEUROTRANSMITTER_RELEASE_CYCLE	0.402357	0.562671	0.42487	1.05864	238	12	STXBP1,STX1A,RAB3A,PPFIA1,VAMP2,PPFIA3
910	REACTOME_BIOSYNTHESIS_OF_SPECIALIZED_PRORESOLVING_MEDIATORS_SPMS	0.401254	0.561982	0.38896	1.05817	255	16	PTGS2,ALOX15,CYP1A1,LTC4S,CYP2C9,GPX4,HPGD
911	REACTOME_RUNX3_REGULATES_BCL2L11_BIM_TRANSCRIPTION	0.422383	0.577957	0.539143	1.05649	233	5	SMAD3,FOXO3,RUNX3,SMAD4
912	REACTOME_SIGNALING_BY_BMP	0.39845	0.559148	0.366751	1.0564	256	21	SMURF1,FSTL1,BMP2,ACVRL1,SKI,BMPR2,SMURF2,SMAD9
913	REACTOME_RHO_GTPASES_ACTIVATE_FORMINS	0.357227	0.521333	0.265375	1.05619	303	129	RHOB,ACTG1,DVL2,MRTFA,ACTB,RCC2,FMNL3,DYNC1H1,TUBB2A,SRC,SRF,CENPS,PPP2R1A,RANGAP1,DIAPH1,PPP2CB,DYNLL2,RHOC,DVL3,PPP2R5B,DVL1,PPP2R5A,TUBB4B
914	REACTOME_ENERGY_DEPENDENT_REGULATION_OF_MTOR_BY_LKB1_AMPK	0.382006	0.543033	0.339107	1.05394	258	28	RRAGC,RRAGD,STK11,RRAGA,RHEB,MTOR,RPTOR,LAMTOR1,MLST8,CAB39,PPM1A
915	REACTOME_DEADENYLATION_DEPENDENT_MRNA_DECAY	0.384217	0.544872	0.296358	1.05348	296	56	EIF4G1,TNKS1BP1,PATL1,CNOT3,SKIV2L,EDC4,DCPS,CNOT11,PABPC1,XRN1
916	REACTOME_ATTACHMENT_AND_ENTRY	0.427798	0.581588	0.537339	1.05296	236	5	FURIN,TMPRSS2,VCP
917	REACTOME_ACYL_CHAIN_REMODELLING_OF_PS	0.3984	0.559148	0.403165	1.05081	248	14	OSBPL10,OSBPL5,PLA2G4E,LPCAT4,MBOAT1,PLAAT3
918	REACTOME_SEALING_OF_THE_NUCLEAR_ENVELOPE_NE_BY_ESCRT_III	0.404545	0.563774	0.357066	1.05032	266	23	TUBB2A,LEMD2,CHMP4B,CC2D1B,CHMP7,VPS4A,TUBB4B,TUBB6,TUBA3D
919	REACTOME_PCP_CE_PATHWAY	0.371891	0.531131	0.278077	1.05001	298	85	DVL2,AP2A1,AP2A2,CLTA,FZD5,PSMA6,FZD1,SMURF1,PSMD3,PSMB9,SCRIB,PSMB10,PSMF1,RAC2,DVL3,PSMB8,DVL1,PSME3,WNT5B,PSME2,RAC3,ARRB2,SMURF2,FZD8,PARD6A,FZD7,AP2M1
920	REACTOME_FGFR1B_LIGAND_BINDING_AND_ACTIVATION	0.463235	0.608486	0.681323	1.04992	251	2	FGF1,FGFR1
921	REACTOME_COENZYME_A_BIOSYNTHESIS	0.417785	0.576533	0.466033	1.04948	248	8	PANK4,PANK2,COASY
922	REACTOME_DECTIN_2_FAMILY	0.420886	0.577903	0.378572	1.04753	265	17	MUC20,FYN,MUC16,LYN,MUC21,MUC15
923	REACTOME_PRESYNAPTIC_DEPOLARIZATION_AND_CALCIUM_CHANNEL_OPENING	0.421141	0.577903	0.46497	1.04709	250	8	CACNG4,CACNB1,CACNB2,CACNA1B,CACNB3,CACNA2D2,CACNA1A
924	REACTOME_POU5F1_OCT4_SOX2_NANOG_ACTIVATE_GENES_RELATED_TO_PROLIFERATION	0.422101	0.577957	0.511939	1.04553	232	6	SOX2,STAT3,EPHA1
925	REACTOME_GLUCOCORTICOID_BIOSYNTHESIS	0.463956	0.608486	0.618436	1.04461	250	3	HSD11B2,HSD11B1,POMC
926	REACTOME_ADENYLATE_CYCLASE_ACTIVATING_PATHWAY	0.422819	0.577957	0.46368	1.04418	251	8	ADCY9,ADCY7,ADCY5,ADCY4,ADCY6
927	REACTOME_ROS_AND_RNS_PRODUCTION_IN_PHAGOCYTES	0.404444	0.563774	0.340197	1.04416	272	26	ATP6V0D1,NCF1,ATP6V0E2,RAC2,TCIRG1,ATP6V0A1,ATP6V0B,NCF4
928	REACTOME_BUTYRATE_RESPONSE_FACTOR_1_BRF1_BINDS_AND_DESTABILIZES_MRNA	0.424051	0.577957	0.375917	1.04019	267	17	MAPKAPK2,AKT1,ZFP36L1,XRN1,EXOSC6
929	REACTOME_GAMMA_CARBOXYLATION_TRANSPORT_AND_AMINO_TERMINAL_CLEAVAGE_OF_PROTEINS	0.447653	0.599975	0.530752	1.04005	247	5	GAS6,FURIN,GGCX
930	REACTOME_PTK6_REGULATES_RTKS_AND_THEIR_EFFECTORS_AKT1_AND_DOK1	0.417094	0.576277	0.449593	1.03979	243	9	AKT1,ARAP1,PTK6,CBL
931	REACTOME_PHYSIOLOGICAL_FACTORS	0.447653	0.599975	0.530606	1.03976	247	5	HIPK2,KAT2B,WWTR1
932	REACTOME_P75NTR_NEGATIVELY_REGULATES_CELL_CYCLE_VIA_SC1	0.453069	0.602574	0.529804	1.03819	250	5	NGFR,PRDM4,HDAC3
933	REACTOME_TRANSPORT_OF_NUCLEOTIDE_SUGARS	0.423932	0.577957	0.448751	1.03784	247	9	SLC35D2,SLC35A2,SLC35B2,SLC35C1
934	REACTOME_METABOLIC_DISORDERS_OF_BIOLOGICAL_OXIDATION_ENZYMES	0.419697	0.576904	0.352704	1.03749	276	23	FDXR,CYP24A1,CYP2U1,CYP27A1,UGT1A1,TBXAS1,GCLM,GSS,GCLC
935	REACTOME_SCAVENGING_OF_HEME_FROM_PLASMA	0.459459	0.606069	0.564073	1.03609	254	4	APOL1,LRP1
936	REACTOME_SYNTHESIS_OF_PC	0.41018	0.569164	0.346556	1.03593	273	24	LPIN1,ACHE,CSNK2A2,LPCAT1,ABHD3,LPIN2,SLC44A2
937	REACTOME_ACTIVATED_NOTCH1_TRANSMITS_SIGNAL_TO_THE_NUCLEUS	0.413235	0.572418	0.334485	1.03532	280	27	APH1A,JAG1,NCSTN,NEURL1B,ARRB2,NOTCH1,ARRB1,DTX2,DTX4,MIB2
938	REACTOME_DNA_DAMAGE_BYPASS	0.418354	0.576533	0.299676	1.03513	309	48	ISG15,TRIM25,UBE2L6,NPLOC4,UBA7
939	REACTOME_DERMATAN_SULFATE_BIOSYNTHESIS	0.44198	0.594845	0.474492	1.03368	258	7	CHST14,CSPG4,VCAN
940	REACTOME_ACETYLCHOLINE_INHIBITS_CONTRACTION_OF_OUTER_HAIR_CELLS	0.480591	0.622874	0.611449	1.03281	259	3	KCNMA1,CHRNA10
941	REACTOME_TRANSPORT_OF_BILE_SALTS_AND_ORGANIC_ACIDS_METAL_IONS_AND_AMINE_COMPOUNDS	0.416337	0.575725	0.293761	1.0316	315	53	SLC39A3,SLC16A3,HEPH,SLC39A7,BSG,SLC6A9,RHCG,SLC22A18,SLC39A14,SLC30A5,RUNX1,SLC30A1,SLC22A5,SLC10A6,SLC44A2,SLC22A15,RHBG,SLC13A4,SLC13A3,SLC6A20,SLC2A13
942	REACTOME_BINDING_OF_TCF_LEF_CTNNB1_TO_TARGET_GENE_PROMOTERS	0.434564	0.587317	0.457282	1.02977	258	8	TCF7L1,TCF7L2,MYC,RUNX3,CTNNB1,TCF7
943	REACTOME_PROTON_COUPLED_MONOCARBOXYLATE_TRANSPORT	0.436594	0.589073	0.503707	1.02872	240	6	SLC16A3,BSG,SLC16A8,SLC16A1,EMB
944	REACTOME_THE_RETINOID_CYCLE_IN_CONES_DAYLIGHT_VISION	0.451866	0.602574	0.767762	1.02674	229	1	DHRS3
945	REACTOME_RUNX2_REGULATES_CHONDROCYTE_MATURATION	0.464865	0.608486	0.558649	1.02613	257	4	HDAC4,RUNX2,CBFB,GLI2
946	REACTOME_SYNTHESIS_OF_LEUKOTRIENES_LT_AND_EOXINS_EX	0.444444	0.596667	0.411218	1.02463	263	12	ALOX15,MAPKAPK2,CYP4A11,LTC4S,ABCC1,ALOX5,CYP4F3
947	REACTOME_ER_TO_GOLGI_ANTEROGRADE_TRANSPORT	0.40732	0.56715	0.255358	1.02342	344	138	CAPZB,KDELR1,ARF3,LMAN2,DYNC1H1,TRAPPC1,CTSZ,TUBB2A,NAPA,TRAPPC9,GBF1,PPP6R1,ARF5,BET1L,SEC24C,CSNK1D,SEC16A,GOSR1,SPTBN1,RAB1B,DYNLL2,ANK1,SPTBN5,TUBB4B,CNIH2,SPTAN1,GORASP1,TUBB6,COPZ2,ARFGAP1,DYNC1LI1,TRAPPC10,TUBA3D,AREG,SPTBN2,ARF1,TGFA,SEC24A
948	REACTOME_OPSINS	0.459725	0.606069	0.765118	1.02321	233	1	RRH
949	REACTOME_ATTACHMENT_OF_GPI_ANCHOR_TO_UPAR	0.452218	0.602574	0.469576	1.02297	264	7	PLAUR,GPAA1,PIGS
950	REACTOME_VASOPRESSIN_LIKE_RECEPTORS	0.459725	0.606069	0.764687	1.02263	233	1	OXTR
951	REACTOME_LINOLEIC_ACID_LA_METABOLISM	0.451087	0.602574	0.500521	1.02221	248	6	ACSL1,ABCD1,FADS1
952	REACTOME_MASTL_FACILITATES_MITOTIC_PROGRESSION	0.432886	0.586033	0.426093	1.02017	257	10	MASTL,PPP2R1A,PPP2CB
953	REACTOME_MECP2_REGULATES_TRANSCRIPTION_FACTORS	0.472072	0.614304	0.554649	1.01878	261	4	MECP2,MEF2C
954	REACTOME_REGULATION_OF_TP53_ACTIVITY_THROUGH_METHYLATION	0.440124	0.593339	0.359767	1.0165	282	19	TP53,EHMT1,EHMT2,EP300,MDM2
955	REACTOME_COPI_MEDIATED_ANTEROGRADE_TRANSPORT	0.436567	0.589073	0.266942	1.0124	350	88	CAPZB,KDELR1,ARF3,DYNC1H1,TUBB2A,NAPA,GBF1,ARF5,BET1L,GOSR1,SPTBN1,RAB1B,DYNLL2,ANK1,SPTBN5,TUBB4B,SPTAN1,GORASP1,TUBB6,COPZ2,ARFGAP1,DYNC1LI1,TUBA3D,SPTBN2,ARF1
956	REACTOME_POLO_LIKE_KINASE_MEDIATED_EVENTS	0.452978	0.602574	0.372083	1.01225	288	16	WEE1,LIN52,EP300
957	REACTOME_FORMATION_OF_RNA_POL_II_ELONGATION_COMPLEX	0.457956	0.606069	0.284749	1.01221	353	56	GTF2F1,PAF1,CTDP1,POLR2A,SUPT5H,NELFB,ELL,CCNK,SUPT6H,MLLT1,ERCC2,CDK9
958	REACTOME_ADENYLATE_CYCLASE_INHIBITORY_PATHWAY	0.456706	0.605128	0.413552	1.01205	268	11	GNAI2,ADCY9,ADCY7,ADCY5,ADCY4
959	REACTOME_ACTIVATED_NTRK2_SIGNALS_THROUGH_FYN	0.461957	0.608016	0.495248	1.01145	254	6	SRC,FYN,DOCK3
960	REACTOME_ENDOGENOUS_STEROLS	0.459248	0.606069	0.361296	1.01134	292	18	FDXR,CYP4V2,RXRA,NCOA1,CYP27A1,NCOA2
961	REACTOME_GLUTAMATE_AND_GLUTAMINE_METABOLISM	0.466997	0.610659	0.395871	1.01096	282	13	PYCR1,KYAT1,GLS,PYCR3,GOT2,GLUD1,GLUD2
962	REACTOME_B_WICH_COMPLEX_POSITIVELY_REGULATES_RRNA_EXPRESSION	0.428944	0.582655	0.281932	1.01057	328	60	MYO1C,ACTB,H2BC21,POLR1A,BAZ1B,SMARCA5,EP300,H2BC7,H4C4,H2BC6,H3C13,KAT2B
963	REACTOME_PI3K_EVENTS_IN_ERBB4_SIGNALING	0.464957	0.608486	0.436849	1.01032	271	9	EREG,NRG2,PIK3CA,BTC,HBEGF
964	REACTOME_PYRIMIDINE_SALVAGE	0.463497	0.608486	0.411715	1.00755	272	11	TYMP,UPP1,DCK,UCK2
965	REACTOME_GDP_FUCOSE_BIOSYNTHESIS	0.48556	0.627798	0.513617	1.00647	268	5	GMDS,SLC35C1
966	REACTOME_TRIGLYCERIDE_CATABOLISM	0.468354	0.611301	0.363701	1.00639	295	17	PRKACA,MGLL,CAV1,PPP1CA,PLIN3,LIPE,FABP6,PRKACB
967	REACTOME_PHASE_0_RAPID_DEPOLARISATION	0.468652	0.611301	0.358862	1.00453	298	18	CACNG4,CACNG6,CACNB1,FGF11,FGF13,CACNB2,SCN4B,CAMK2G,CAMK2D,CACNA2D2
968	REACTOME_DOPAMINE_NEUROTRANSMITTER_RELEASE_CYCLE	0.4688	0.611301	0.376442	1.00325	292	15	CASK,STXBP1,STX1A,RAB3A,PPFIA1,APBA1
969	REACTOME_MITOTIC_G1_PHASE_AND_G1_S_TRANSITION	0.470723	0.613044	0.247108	1.00267	409	148	WEE1,CDKN1C,CCND1,CDKN2B,ABL1,PSMA6,JAK2,CCND3,SRC,AKT1,CDK6,PSMD3,PSMB9,PPP2R1A,PSMB10,CDKN1A,LIN52,PPP2R2A,CCND2,CDKN1B,PPP2CB,PSMF1,PTK6,DYRK1A,PSMB8,LYN,PSME3,CDKN2A,MCM5,PSME2
970	REACTOME_LATE_ENDOSOMAL_MICROAUTOPHAGY	0.458636	0.606069	0.310704	1.001	315	33	MVB12A,VPS37B,VPS37C,VIM,UBAP1,CHMP4B,HDAC6,CHMP7
971	REACTOME_ACTIVATION_OF_THE_PHOTOTRANSDUCTION_CASCADE	0.49278	0.634587	0.510297	0.999965	272	5	GNB1,CNGA1
972	REACTOME_PHASE_I_FUNCTIONALIZATION_OF_COMPOUNDS	0.462986	0.608486	0.265111	0.993595	368	82	EPHX1,CYB5R3,POR,AOC1,SMOX,ALDH2,FDXR,CYP4A11,CYP4V2,RXRA,NCOA1,CYP1A1,CYP24A1,CYP2U1,CES2,CYP26A1,CYP27A1,NCOA2,CYP2C9,CYP2J2,ALDH3A1,ACSS2,TBXAS1,ACSS1
973	REACTOME_RETINOID_CYCLE_DISEASE_EVENTS	0.493174	0.634587	0.455328	0.99193	288	7	STRA6,LRAT
974	REACTOME_PI_3K_CASCADE_FGFR4	0.478632	0.621335	0.428717	0.991509	279	9	GRB2,FGF1,PIK3CA
975	REACTOME_AUTOPHAGY	0.469006	0.611301	0.247015	0.990616	400	136	MVB12A,VPS37B,AMBRA1,CSNK2A2,VPS37C,DYNC1H1,TUBB2A,PGAM5,SRC,TOMM40,RRAGC,PEX5,VIM,UBAP1,RRAGD,PINK1,HSF1,CHMP4B,MAP1LC3A,RRAGA,HDAC6,RHEB,SQSTM1,DYNLL2,MTOR,ATG4D,UVRAG,RPTOR,CHMP7,TUBB4B,MTMR14,LAMTOR1,TUBB6,ATG9A,MFN2,VCP,MLST8
976	REACTOME_NR1H2_NR1H3_REGULATE_GENE_EXPRESSION_LINKED_TO_TRIGLYCERIDE_LIPOLYSIS_IN_ADIPOSE	0.501805	0.638553	0.505453	0.990474	277	5	RXRA,NR1H2,RXRB
977	REACTOME_METABOLISM_OF_NUCLEOTIDES	0.490637	0.633346	0.26093	0.988685	392	89	SAMHD1,XDH,GMPR,NME4,NT5C3A,GSR,TYMP,NT5C2,UPP1
978	REACTOME_PP2A_MEDIATED_DEPHOSPHORYLATION_OF_KEY_METABOLIC_FACTORS	0.5	0.637767	0.453326	0.987569	292	7	PPP2R1A,PPP2CB,PPP2R5D,MLXIPL,PPP2CA
979	REACTOME_GOLGI_CISTERNAE_PERICENTRIOLAR_STACK_REORGANIZATION	0.4848	0.62732	0.378632	0.986869	302	14	RAB1B,BLZF1,MAPK3,GORASP2,GORASP1,MAPK1
980	REACTOME_DOWNREGULATION_OF_ERBB2_ERBB3_SIGNALING	0.4967	0.636582	0.385586	0.984695	300	13	AKT1,NRG2,ERBB2,RNF41,AKT2
981	REACTOME_TRANSPORT_OF_ORGANIC_ANIONS	0.498188	0.636969	0.48188	0.984143	274	6	SLCO4A1,SLCO3A1
982	REACTOME_COLLAGEN_CHAIN_TRIMERIZATION	0.479042	0.621366	0.325438	0.983162	319	25	COL4A2,COL17A1,COL9A2,COL18A1,COL16A1,COL27A1,COL8A1,COL4A1
983	REACTOME_DEFENSINS	0.498188	0.636969	0.48132	0.983	274	6	TLR2,DEFB4A,PRSS3
984	REACTOME_METAL_ION_SLC_TRANSPORTERS	0.482115	0.624347	0.347611	0.982152	309	19	SLC39A3,HEPH,SLC39A7,SLC39A14,SLC30A5,SLC30A1
985	REACTOME_DEFECTIVE_CHST3_CAUSES_SEDCJD	0.500901	0.638411	0.534083	0.981004	277	4	CSPG4,VCAN,CHST3
986	REACTOME_PROLACTIN_RECEPTOR_SIGNALING	0.488255	0.630777	0.409358	0.980097	290	10	STAT5A,JAK2,STAT5B
987	REACTOME_SEROTONIN_RECEPTORS	0.560662	0.689486	0.633632	0.976426	304	2	HTR2B,HTR7
988	REACTOME_CYTOPROTECTION_BY_HMOX1	0.510059	0.64435	0.247731	0.975985	430	117	HELZ2,PRKCD,KEAP1,CSNK2A2,PSMA6,TBL1X,HMOX1,STAT3,PSMD3,COX5A,CARM1,PSMB9,TACO1,CREBBP,CUL3,PSMB10,RXRA,PSMF1,FBXL17,NCOA1,PTK6,PSMB8,PSME3,PSME2,NCOA2,NCOA6,PPARA,BACH1,MAFK
989	REACTOME_CREB1_PHOSPHORYLATION_THROUGH_THE_ACTIVATION_OF_ADENYLATE_CYCLASE	0.494017	0.635165	0.421905	0.975755	288	9	PRKACA,PRKX,PRKAR1B,PRKACB,PRKAR2B
990	REACTOME_PI_3K_CASCADE_FGFR3	0.495726	0.636463	0.42165	0.975165	289	9	GRB2,FGF1,PIK3CA
991	REACTOME_ACTIVATED_NTRK2_SIGNALS_THROUGH_PI3K	0.510239	0.64435	0.447189	0.974199	298	7	GRB2,PIK3CA,NTF4
992	REACTOME_CELLULAR_RESPONSE_TO_CHEMICAL_STRESS	0.530286	0.661728	0.23952	0.973454	463	147	HELZ2,PRKCD,TXNRD2,KEAP1,CSNK2A2,P4HB,NCF1,PSMA6,TBL1X,GSR,HMOX1,STAT3,PSMD3,COX5A,CARM1,PSMB9,TACO1,SOD2,CREBBP,CUL3,PSMB10,ERO1A,RXRA,PSMF1,FBXL17,NCOA1,PTK6,PSMB8,PSME3,PSME2,NCOA2,NCOA6,PPARA,GPX3,BACH1,MAFK
993	REACTOME_HCMV_EARLY_EVENTS	0.507264	0.642492	0.25255	0.972187	418	95	PML,TRIM28,DYNC1H1,TUBB2A,H2BC21,TBL1X,POM121C,RBBP7,NFKB1,H2BC7,EGFR,ELK1,DYNLL2,H4C4,H2BC6,H3C13,NUP188,TUBB4B,NUP62,TUBB6
994	REACTOME_VISUAL_PHOTOTRANSDUCTION	0.512386	0.645387	0.269079	0.971165	392	63	AGRN,LRP10,LDLR,GNB1,STRA6,HSPG2,GPC6,SDC1,CYP4V2,SDC3,HSD17B1,CNGA1,LRP1,SDC4,NMT1,DHRS3,RGS9,LRP12,GPC4,GPC1,LRP8,APOB,GPC2,PRKCQ,APOE,RETSAT
995	REACTOME_RHOBTB_GTPASE_CYCLE	0.501429	0.638553	0.297503	0.970271	350	35	ACTN1,ACTG1,DBN1,VIM,CUL3,RHOBTB2,SPEN
996	REACTOME_SENSORY_PERCEPTION_OF_TASTE	0.499222	0.637767	0.343344	0.970095	320	19	GNB1,ITPR3,SCNN1B,TRPM4,SCNN1A,TAS1R3,SCN4B,TAS2R3
997	REACTOME_PI_3K_CASCADE_FGFR1	0.507692	0.642492	0.419295	0.969719	296	9	GRB2,FGF1,PIK3CA,FGFR1
998	REACTOME_MITOCHONDRIAL_BIOGENESIS	0.506143	0.642492	0.252629	0.968377	411	93	HELZ2,NR1D1,ESRRA,PPRC1,TBL1X,CARM1,MEF2D,CRTC3,SOD2,CREBBP,MAPK14,CRTC2,RXRA,NCOA1,HCFC1,TWNK,NCOA2,NCOA6,PPARA
999	REACTOME_PRC2_METHYLATES_HISTONES_AND_DNA	0.532974	0.664568	0.28151	0.965288	395	45	H2BC21,JARID2,RBBP7,DNMT1,H2BC7,H4C4,DNMT3A,H2BC6,H3C13,PHF1,AEBP2,H3C6
1000	REACTOME_TRANSPORT_OF_CONNEXONS_TO_THE_PLASMA_MEMBRANE	0.520202	0.652129	0.387139	0.96463	308	12	TUBB2A,GJB2,TUBB4B,TUBB6,TUBA3D
1001	REACTOME_PRESYNAPTIC_NICOTINIC_ACETYLCHOLINE_RECEPTORS	0.584559	0.710735	0.625647	0.964122	317	2	CHRNB2,CHRNG
1002	REACTOME_HIGHLY_SODIUM_PERMEABLE_POSTSYNAPTIC_ACETYLCHOLINE_NICOTINIC_RECEPTORS	0.584559	0.710735	0.625647	0.964122	317	2	CHRNB2,CHRNG
1003	REACTOME_INTRA_GOLGI_AND_RETROGRADE_GOLGI_TO_ER_TRAFFIC	0.54814	0.679578	0.230822	0.960568	500	181	CAPZB,GALNT2,KIF13B,KDELR1,CUX1,IGF2R,ARF3,MAN1C1,KIF26B,DYNC1H1,KIF1C,TUBB2A,NAPA,SURF4,GBF1,ARF5,RAB6A,BET1L,AGPAT3,USP6NL,GOSR1,VPS53,ARFRP1,MAN1A1,RAB1B,KLC1,DYNLL2,BICD1,KIF19,NAA30,KIF21B,TUBB4B,RHOBTB3,RGP1,KLC2,TUBB6
1004	REACTOME_CHYLOMICRON_ASSEMBLY	0.536101	0.667433	0.490118	0.960423	296	5	P4HB,APOB,APOE,MTTP
1005	REACTOME_TETRAHYDROBIOPTERIN_BH4_SYNTHESIS_RECYCLING_SALVAGE_AND_REGULATION	0.519658	0.652129	0.41499	0.959764	303	9	SPR,AKT1,GCH1
1006	REACTOME_TRISTETRAPROLIN_TTP_ZFP36_BINDS_AND_DESTABILIZES_MRNA	0.52057	0.652129	0.346845	0.959744	328	17	ZFP36,MAPKAPK2,XRN1,EXOSC6
1007	REACTOME_HDR_THROUGH_MMEJ_ALT_NHEJ	0.506711	0.642492	0.400693	0.959352	301	10	NBN,LIG3
1008	REACTOME_SIGNALING_BY_TGF_BETA_RECEPTOR_COMPLEX_IN_CANCER	0.516779	0.6494	0.42544	0.958069	307	8	TGFB1,SMAD3,TGFBR2
1009	REACTOME_GLYCOLYSIS	0.541069	0.67206	0.263846	0.953565	414	64	HK2,PRKACA,PFKP,HK1,POM121C,PKM,PPP2R1A,PFKFB3,PPP2CB,PFKFB4,PFKL,NUP188,NUP62,GPI
1010	REACTOME_SIALIC_ACID_METABOLISM	0.511111	0.64435	0.310677	0.953559	344	26	CTSA,ST3GAL1,ST6GALNAC2,ST3GAL4,NEU1,ST6GALNAC4,ST3GAL5,ST6GALNAC6,ST3GAL3
1011	REACTOME_DEFECTIVE_CHST6_CAUSES_MCDC1	0.595588	0.718121	0.617285	0.951236	323	2	CHST6,FMOD
1012	REACTOME_DEFECTIVE_ST3GAL3_CAUSES_MCT12_AND_EIEE15	0.595588	0.718121	0.617285	0.951236	323	2	ST3GAL3,FMOD
1013	REACTOME_DEFECTIVE_B4GALT1_CAUSES_B4GALT1_CDG_CDG_2D	0.595588	0.718121	0.617285	0.951236	323	2	B4GALT1,FMOD
1014	REACTOME_NONCANONICAL_ACTIVATION_OF_NOTCH3	0.52349	0.654769	0.421758	0.949777	311	8	APH1A,YBX1,NOTCH3,NCSTN
1015	REACTOME_LGI_ADAM_INTERACTIONS	0.52349	0.654769	0.421723	0.949698	311	8	CACNG4,STX1A,ADAM23
1016	REACTOME_GOLGI_TO_ER_RETROGRADE_TRANSPORT	0.568558	0.697598	0.241021	0.948129	480	116	CAPZB,GALNT2,KIF13B,KDELR1,ARF3,KIF26B,DYNC1H1,KIF1C,TUBB2A,NAPA,SURF4,GBF1,ARF5,RAB6A,AGPAT3,RAB1B,KLC1,DYNLL2,BICD1,KIF19,KIF21B,TUBB4B,KLC2,TUBB6,COPZ2
1017	REACTOME_SYNTHESIS_OF_12_EICOSATETRAENOIC_ACID_DERIVATIVES	0.539855	0.67107	0.463731	0.947078	297	6	ALOX15,GPX4,ALOXE3,GPX1
1018	REACTOME_REGULATION_OF_LOCALIZATION_OF_FOXO_TRANSCRIPTION_FACTORS	0.552189	0.683143	0.379989	0.946816	327	12	AKT1,YWHAG,FOXO3,AKT2,FOXO4,AKT3,SFN
1019	REACTOME_ARACHIDONIC_ACID_METABOLISM	0.565934	0.694908	0.280054	0.946545	411	42	PTGS2,ALOX15,MAPKAPK2,PRXL2B,CYP4A11,PTGES2,CYP1A1,CYP2U1,LTC4S,CYP2C9,GPX4,CYP2J2,TBXAS1,HPGD,ABCC1,ALOX5,CYP4F3,ALOXE3
1020	REACTOME_TRIGLYCERIDE_BIOSYNTHESIS	0.528523	0.66004	0.420305	0.946505	314	8	LPIN1,LPIN2,DGAT2,LPIN3
1021	REACTOME_PTK6_PROMOTES_HIF1A_STABILIZATION	0.552536	0.683143	0.461019	0.941539	304	6	EGFR,PTK6,HBEGF
1022	REACTOME_RHOBTB3_ATPASE_CYCLE	0.538591	0.670015	0.392051	0.938662	320	10	LRRC41,CUL3,RHOBTB3,PLIN3,CCNE1,HGS,HTR7
1023	REACTOME_HOST_INTERACTIONS_OF_HIV_FACTORS	0.59577	0.718121	0.235988	0.937449	506	123	HLA-A,AP1M1,AP2A1,AP2A2,AP1B1,HMGA1,PSMA6,KPNB1,SLC25A6,POM121C,RCC1,PSMD3,PSMB9,RANGAP1,APOBEC3G,PSMB10,PACS1,FYN,CDK9,PSMF1,NUP188,PAK2,PSMB8,PSME3,PSME2
1024	REACTOME_MRNA_SPLICING	0.606325	0.725698	0.224219	0.935016	555	187	SF3A2,GTF2F1,SF3A1,SNRPB,HNRNPL,XAB2,SART1,SF3B2,RNPS1,SF3B4,PUF60,PTBP1,PRPF8,HNRNPUL1,POLR2A,HNRNPA0,DHX38,PRCC,CHERP,WBP11,ELAVL1,CASC3,SYMPK,PCBP2,ALYREF,PCBP1,YBX1,HNRNPD
1025	REACTOME_ACTIVATED_NTRK2_SIGNALS_THROUGH_FRS2_AND_FRS3	0.548387	0.679578	0.381894	0.934575	322	11	GRB2,HRAS,KRAS,NTF4,SOS1
1026	REACTOME_INTRA_GOLGI_TRAFFIC	0.587258	0.712404	0.277366	0.927525	423	40	CUX1,MAN1C1,NAPA,BET1L,GOSR1,MAN1A1
1027	REACTOME_ION_TRANSPORT_BY_P_TYPE_ATPASES	0.56414	0.693234	0.283469	0.926372	386	37	ATP13A2,ATP11A,FXYD3,ATP8B2,ATP8B1,ATP13A1,ATP2A2,ATP12A,ATP10A
1028	REACTOME_DECTIN_1_MEDIATED_NONCANONICAL_NF_KB_SIGNALING	0.597132	0.718842	0.258386	0.92617	457	60	RELA,CCL22,RELB,PSMA6,PSMD3,PSMB9,MAP3K14,UBE2M,NFKB2,PSMB10,PSMF1,PSMB8,PSME3,PSME2
1029	REACTOME_RNA_POLYMERASE_I_TRANSCRIPTION	0.594185	0.718121	0.248002	0.92526	469	79	GATAD2A,GATAD2B,H2BC21,CAVIN1,MTA2,POLR1A,EHMT2,RBBP7,ERCC2,H2BC7,H4C4,H2BC6,H3C13,MBD2,KAT2B,UBTF,MAPK3,H3C6,CHD3
1030	REACTOME_NS1_MEDIATED_EFFECTS_ON_HOST_PATHWAYS	0.598066	0.719019	0.275688	0.925225	432	41	ISG15,EIF2AK2,KPNB1,POM121C
1031	REACTOME_FLT3_SIGNALING_THROUGH_SRC_FAMILY_KINASES	0.598891	0.719473	0.547495	0.924784	323	3	FYN,SYK
1032	REACTOME_FGFR2_ALTERNATIVE_SPLICING	0.555882	0.685702	0.298344	0.923453	377	27	GTF2F1,PTBP1,POLR2A,RBFOX2,HNRNPM,POLR2D,TIAL1
1033	REACTOME_DEGRADATION_OF_BETA_CATENIN_BY_THE_DESTRUCTION_COMPLEX	0.612374	0.730137	0.245449	0.920302	484	83	PSMA6,PSMD3,TCF7L1,PSMB9,TCF7L2,AXIN1,PPP2R1A,TLE5,PSMB10,TLE4,TLE1,CTBP2,PPP2CB,PSMF1,CTBP1,TLE3,PSMB8,PPP2R5B,PSME3,PPP2R5A,PSME2,MYC
1034	REACTOME_RUNX1_AND_FOXP3_CONTROL_THE_DEVELOPMENT_OF_REGULATORY_T_LYMPHOCYTES_TREGS	0.558559	0.687949	0.499936	0.918283	309	4	NFATC2,RUNX1,CBFB
1035	REACTOME_DISEASES_ASSOCIATED_WITH_GLYCOSYLATION_PRECURSOR_BIOSYNTHESIS	0.573668	0.701613	0.327304	0.916193	365	18	CTSA,NUS1,NEU1,PMM2,GALE,DHDDS,GALK1
1036	REACTOME_REGULATION_OF_RUNX2_EXPRESSION_AND_ACTIVITY	0.601804	0.721896	0.250932	0.915652	466	67	STAT1,ESRRA,PSMA6,SMURF1,PSMD3,BMP2,PSMB9,PSMB10,PSMF1,WWP1,PSMB8,PSME3,NR3C1,PSME2,ESR1
1037	REACTOME_RELAXIN_RECEPTORS	0.648897	0.755327	0.5929	0.913659	352	2	RLN2,INSL3
1038	REACTOME_MYOCLONIC_EPILEPSY_OF_LAFORA	0.581197	0.708251	0.394803	0.913075	339	9	GYS1,NHLRC1
1039	REACTOME_SCAVENGING_BY_CLASS_B_RECEPTORS	0.574007	0.701613	0.464761	0.910735	317	5	SCARB1,APOB
1040	REACTOME_MECP2_REGULATES_TRANSCRIPTION_OF_NEURONAL_LIGANDS	0.59058	0.715855	0.445477	0.909797	325	6	MECP2,DLL1,SIN3A
1041	REACTOME_TACHYKININ_RECEPTORS_BIND_TACHYKININS	0.642436	0.752101	0.679506	0.908717	326	1	TACR2
1042	REACTOME_TNFR1_MEDIATED_CERAMIDE_PRODUCTION	0.575812	0.702753	0.463624	0.908507	318	5	TNFRSF1A,SMPD3
1043	REACTOME_G2_M_DNA_DAMAGE_CHECKPOINT	0.622951	0.740645	0.242677	0.90742	493	81	WEE1,TP53,PIAS4,H2BC21,NBN,YWHAG,H2BC7,HUS1,BRIP1,H4C4,HERC2,H2BC6
1044	REACTOME_SODIUM_COUPLED_SULPHATE_DI_AND_TRI_CARBOXYLATE_TRANSPORTERS	0.619224	0.736757	0.537187	0.907374	334	3	SLC13A4,SLC13A3,SLC13A2
1045	REACTOME_PTK6_EXPRESSION	0.577617	0.704422	0.462787	0.906866	319	5	PTK6,NR3C1,PELP1
1046	REACTOME_INTERLEUKIN_12_SIGNALING	0.631215	0.746182	0.269999	0.906134	456	41	CNN2,P4HB,JAK2,SOD2,PITPNA,SERPINB2,CFL1,JAK1,PAK2,PSME2
1047	REACTOME_CALCINEURIN_ACTIVATES_NFAT	0.586325	0.712194	0.391361	0.905116	342	9	NFATC1,PPP3R1,NFATC2,PPP3CA
1048	REACTOME_KSRP_KHSRP_BINDS_AND_DESTABILIZES_MRNA	0.607595	0.726678	0.326828	0.904354	383	17	KHSRP,AKT1,MAPK14,EXOSC6
1049	REACTOME_CELLULAR_RESPONSE_TO_HEAT_STRESS	0.642857	0.752101	0.234786	0.903804	530	95	HSPA6,HSPA1A,BAG3,DEDD2,AKT1S1,HSPA1B,TNFRSF21,MAPKAPK2,POM121C,CCAR2,HSF1,DNAJB1,CREBBP,EP300,HDAC6,MTOR,RPTOR,NUP188,HSPA2,HSPA4,NUP62,MAPK3,VCP,BAG5,MLST8,SIRT1
1050	REACTOME_ACTIVATION_OF_C3_AND_C5	0.612319	0.730137	0.440493	0.899619	337	6	C3,CFB,C4B,C4A
1051	REACTOME_GLYCOGEN_BREAKDOWN_GLYCOGENOLYSIS	0.6048	0.72495	0.34473	0.898507	377	14	PHKA1,GAA,PHKG1,PYGB
1052	REACTOME_DEFECTIVE_F9_ACTIVATION	0.658153	0.762795	0.671576	0.898112	334	1	GP1BA
1053	REACTOME_FORMATION_OF_THE_EARLY_ELONGATION_COMPLEX	0.608759	0.72753	0.281001	0.898093	416	31	GTF2F1,CTDP1,POLR2A,SUPT5H,NELFB,ERCC2,POLR2D,NELFA
1054	REACTOME_COPII_MEDIATED_VESICLE_TRANSPORT	0.64129	0.752013	0.246864	0.896129	496	65	LMAN2,TRAPPC1,CTSZ,NAPA,TRAPPC9,PPP6R1,SEC24C,CSNK1D,SEC16A,RAB1B
1055	REACTOME_ACTIVATED_PKN1_STIMULATES_TRANSCRIPTION_OF_AR_ANDROGEN_RECEPTOR_REGULATED_GENES_KLK2_AND_KLK3	0.639942	0.752013	0.273965	0.895314	438	37	PKN1,H2BC21,H2BC7,H4C4,H2BC6,H3C13,NCOA2,H3C6
1056	REACTOME_SYNTHESIS_OF_PIPS_AT_THE_ER_MEMBRANE	0.586643	0.712194	0.45682	0.895173	324	5	PI4KA,PI4K2B,SBF1
1057	REACTOME_SELECTIVE_AUTOPHAGY	0.641849	0.752013	0.243224	0.89378	499	69	CSNK2A2,DYNC1H1,TUBB2A,PGAM5,SRC,TOMM40,PEX5,VIM,PINK1,HSF1,MAP1LC3A,HDAC6,SQSTM1,DYNLL2
1058	REACTOME_APOPTOTIC_FACTOR_MEDIATED_RESPONSE	0.611198	0.729903	0.315304	0.89087	392	19	APAF1,BAK1,CDKN2A,BAX,MAPK3,MAPK1,GSDMD,AVEN,XIAP,CASP7
1059	REACTOME_HIV_LIFE_CYCLE	0.703233	0.796701	0.219501	0.889172	608	144	MVB12A,GTF2F1,VPS37B,VPS37C,CTDP1,HMGA1,POLR2A,SUPT5H,NELFB,POM121C,TAF7,FURIN,RCC1,ELL,TAF4B,CCNK,UBAP1,RANGAP1,CHMP4B,TAF4,ERCC2,CDK9,NEDD4L,NUP188,CHMP7,POLR2D,VPS4A,TAF6
1060	REACTOME_ACYL_CHAIN_REMODELLING_OF_PC	0.612753	0.730137	0.314583	0.888834	393	19	PLA2G4C,MBOAT2,PLA2G4E,LPCAT1,LPCAT4
1061	REACTOME_RHO_GTPASES_ACTIVATE_KTN1	0.615772	0.733192	0.370785	0.887747	366	10	RHOG,KLC1,KLC2,KLC3
1062	REACTOME_RHOT1_GTPASE_CYCLE	0.597473	0.718842	0.452422	0.886555	330	5	RHOT1,TRAK1,RAP1GDS1
1063	REACTOME_PROSTANOID_LIGAND_RECEPTORS	0.590991	0.715855	0.482562	0.88637	327	4	PTGER4,PTGER1,PTGER2
1064	REACTOME_ABACAVIR_TRANSMEMBRANE_TRANSPORT	0.674632	0.774097	0.574504	0.88531	366	2	SLC22A3,SLC22A1
1065	REACTOME_FRS_MEDIATED_FGFR2_SIGNALING	0.626263	0.743069	0.354115	0.882345	371	12	GRB2,FGF1,HRAS,KRAS
1066	REACTOME_DEFECTIVE_C1GALT1C1_CAUSES_TNPS	0.624	0.741345	0.33092	0.88193	389	15	MUC20,MUC16,C1GALT1,MUC21,MUC15
1067	REACTOME_NEDDYLATION	0.738378	0.825327	0.208908	0.881663	682	213	FBXW4,KEAP1,UBE2D2,FBXL18,FBXO6,COPS7A,PSMA6,DCAF7,DDA1,KLHL21,PSMD3,DCAF10,CISH,FBXO32,WDTC1,PSMB9,SOCS3,TULP4,ASB6,UBE2M,LRRC41,NUB1,CUL3,PSMB10,RBBP7,FBXW9,PSMF1,DCAF5,BTBD6,SOCS2,FBXO31,WDR5,WSB2,PSMB8,FBXW5,SPSB2,KLHL5,PSME3,ASB13,PSME2,FBXL7,CUL7
1068	REACTOME_RELEASE_OF_APOPTOTIC_FACTORS_FROM_THE_MITOCHONDRIA	0.632246	0.74619	0.43128	0.880803	348	6	BAK1,BAX,GSDMD
1069	REACTOME_SIGNALING_BY_RETINOIC_ACID	0.650725	0.756362	0.269999	0.879979	448	36	RARA,PPARD,CRABP2,RXRA,CYP26A1,CPT1A,DHRS4,ALDH1A3,RDH13,DHRS3,ALDH1A2,RARG,RXRB,ADH4
1070	REACTOME_SYNTHESIS_OF_PIPS_AT_THE_GOLGI_MEMBRANE	0.626959	0.743217	0.322976	0.878656	399	16	ARF3,PI4KA,PI4K2A,PI4K2B,VAC14,ARF1
1071	REACTOME_PURINE_CATABOLISM	0.6288	0.74477	0.329661	0.878574	392	15	XDH,NT5C2
1072	REACTOME_NRCAM_INTERACTIONS	0.632246	0.74619	0.429837	0.877857	348	6	ANK1,DLG1,NRCAM,NRP2
1073	REACTOME_TRANSCRIPTION_OF_THE_HIV_GENOME	0.686452	0.782089	0.240777	0.876494	531	66	GTF2F1,CTDP1,POLR2A,SUPT5H,NELFB,TAF7,ELL,TAF4B,CCNK,TAF4,ERCC2,CDK9,POLR2D,TAF6,NELFA,TAF15
1074	REACTOME_MITOTIC_PROPHASE	0.716168	0.805689	0.223653	0.874921	597	113	LMNA,EMD,LPIN1,H2BC21,POM121C,MASTL,PPP2R1A,LEMD2,H2BC7,PPP2CB,RAB1B,H4C4,H2BC6,H3C13,NUP188,PHF8,BLZF1,NUMA1,NUP62,MAPK3,GORASP2,GORASP1,CNEP1R1,LPIN2,H3C6
1075	REACTOME_DEFECTS_IN_BIOTIN_BTN_METABOLISM	0.629195	0.74477	0.387703	0.873087	374	8	PC,ACACA,MCCC2,HLCS
1076	REACTOME_LYSOSPHINGOLIPID_AND_LPA_RECEPTORS	0.640068	0.752013	0.355016	0.868799	376	11	PLPPR3,S1PR2,PLPPR2,LPAR2,S1PR3,S1PR1
1077	REACTOME_HIV_TRANSCRIPTION_ELONGATION	0.687845	0.783123	0.258294	0.866852	497	41	GTF2F1,CTDP1,POLR2A,SUPT5H,NELFB,ELL,ERCC2,CDK9
1078	REACTOME_DEGRADATION_OF_CYSTEINE_AND_HOMOCYSTEINE	0.6633	0.768207	0.347598	0.866106	393	12	MPST,TST,ADO,CTH,GOT2
1079	REACTOME_SIGNALING_BY_NOTCH4	0.719343	0.808696	0.232009	0.865594	568	79	NOTCH2,HES1,APH1A,PSMA6,JAG1,AKT1,PSMD3,PSMB9,CREBBP,PSMB10,SMAD3,EP300,PSMF1,PSMB8,PSME3,KAT2B,PSME2,NCSTN,ACTA2,MAML2,NOTCH1
1080	REACTOME_NEUROTOXICITY_OF_CLOSTRIDIUM_TOXINS	0.652174	0.756954	0.423122	0.864143	359	6	STX1A,SV2C,VAMP2
1081	REACTOME_MITOCHONDRIAL_FATTY_ACID_BETA_OXIDATION_OF_SATURATED_FATTY_ACIDS	0.650255	0.756361	0.352875	0.863559	382	11	ACADS,ACSM6,ECHS1
1082	REACTOME_GLYCOGEN_METABOLISM	0.654192	0.758749	0.285555	0.862676	436	25	GYS1,PHKA1,NHLRC1,GAA,PHKG1,PYGB
1083	REACTOME_DNA_METHYLATION	0.675362	0.774383	0.264594	0.862363	465	36	H2BC21,DNMT1,H2BC7,H4C4,DNMT3A,H2BC6,H3C13,UHRF1,H3C6
1084	REACTOME_G1_S_DNA_DAMAGE_CHECKPOINTS	0.712258	0.803302	0.236786	0.861966	551	66	TP53,PSMA6,ZNF385A,PSMD3,PSMB9,PSMB10,CDKN1A,CDKN1B,MDM2,PSMF1,PSMB8,PSME3,CDKN2A,PSME2,PHF20
1085	REACTOME_SIGNALING_BY_MRAS_COMPLEX_MUTANTS	0.644295	0.752272	0.382534	0.861447	383	8	ARAF,MRAS
1086	REACTOME_PYRUVATE_METABOLISM	0.647315	0.7548	0.272859	0.861288	445	29	PPARD,SLC16A3,BSG,RXRA,ME1,LDHB,PDP1
1087	REACTOME_BIOSYNTHESIS_OF_THE_N_GLYCAN_PRECURSOR_DOLICHOL_LIPID_LINKED_OLIGOSACCHARIDE_LLO_AND_TRANSFER_TO_A_NASCENT_PROTEIN	0.722721	0.811419	0.234232	0.860739	562	69	RENBP,CTSA,GMDS,ALG2,ST3GAL1,ALG12,NUS1,GMPPB,NUDT14,ST6GALNAC2,AMDHD2,ST3GAL4,NEU1,ST6GALNAC4,DOLPP1,ST3GAL5,SLC35C1,PMM2
1088	REACTOME_HCMV_LATE_EVENTS	0.72522	0.813033	0.228667	0.85999	577	84	MVB12A,VPS37B,VPS37C,H2BC21,POM121C,UBAP1,CHMP4B,CHMP1A,H2BC7,H4C4,H2BC6,H3C13,NUP188,CHMP7,VPS4A,NUP62
1089	REACTOME_ZINC_EFFLUX_AND_COMPARTMENTALIZATION_BY_THE_SLC30_FAMILY	0.637838	0.750589	0.468	0.859622	353	4	SLC30A5,SLC30A1
1090	REACTOME_CHL1_INTERACTIONS	0.647651	0.7548	0.380729	0.857381	385	8	NRP1,ITGA1,ANK1
1091	REACTOME_SYNTHESIS_SECRETION_AND_INACTIVATION_OF_GLUCAGON_LIKE_PEPTIDE_1_GLP_1	0.666107	0.769341	0.357573	0.856113	396	10	GNB1,TCF7L2
1092	REACTOME_REGULATION_OF_RUNX3_EXPRESSION_AND_ACTIVITY	0.703801	0.796784	0.242653	0.855462	536	55	PSMA6,SRC,SMURF1,PSMD3,PSMB9,PSMB10,TGFB1,EP300,MDM2,PSMF1,PSMB8,PSME3,CDKN2A,PSME2
1093	REACTOME_GLI_PROTEINS_BIND_PROMOTERS_OF_HH_RESPONSIVE_GENES_TO_PROMOTE_TRANSCRIPTION	0.644404	0.752272	0.435493	0.853383	356	5	GLI3,PTCH1,PTCH2,GLI2
1094	REACTOME_NOTCH4_ACTIVATION_AND_TRANSMISSION_OF_SIGNAL_TO_THE_NUCLEUS	0.667785	0.769907	0.356091	0.852565	397	10	APH1A,JAG1,NCSTN
1095	REACTOME_TRANSFERRIN_ENDOCYTOSIS_AND_RECYCLING	0.672156	0.772907	0.281942	0.851761	448	25	ATP6V0D1,ATP6AP1,MCOLN1,ATP6V0E2,TCIRG1,ATP6V0A1,ATP6V0B,TFRC,STEAP3
1096	REACTOME_NUCLEOTIDE_SALVAGE	0.665639	0.769341	0.291781	0.851218	431	22	GMPR,TYMP,UPP1
1097	REACTOME_RNA_POLYMERASE_I_TRANSCRIPTION_INITIATION	0.712551	0.803302	0.249897	0.850993	527	43	GATAD2A,GATAD2B,MTA2,POLR1A,EHMT2,RBBP7,ERCC2,KAT2B,UBTF
1098	REACTOME_MAPK3_ERK1_ACTIVATION	0.677852	0.776686	0.354727	0.849299	403	10	JAK2,JAK1,MAPK3,MAP2K1,TYK2
1099	REACTOME_GLUTAMATE_NEUROTRANSMITTER_RELEASE_CYCLE	0.6784	0.776761	0.3179	0.84723	423	15	STXBP1,STX1A,RAB3A,PPFIA1,GLS,SLC1A3,VAMP2,PPFIA3
1100	REACTOME_COPI_DEPENDENT_GOLGI_TO_ER_RETROGRADE_TRAFFIC	0.755332	0.833699	0.224842	0.845603	601	84	KIF13B,KDELR1,ARF3,KIF26B,KIF1C,TUBB2A,NAPA,SURF4,GBF1,ARF5,RAB1B,KLC1,KIF19,KIF21B,TUBB4B,KLC2,TUBB6,COPZ2
1101	REACTOME_REGULATION_OF_HSF1_MEDIATED_HEAT_SHOCK_RESPONSE	0.752852	0.833511	0.226797	0.845043	593	78	HSPA6,HSPA1A,BAG3,DEDD2,HSPA1B,TNFRSF21,MAPKAPK2,POM121C,CCAR2,HSF1,DNAJB1
1102	REACTOME_REGULATION_OF_RAS_BY_GAPS	0.744516	0.828944	0.232106	0.844927	576	66	SPRED1,SPRED3,PSMA6,RASA1,PSMD3,PSMB9,CUL3,PSMB10,DAB2IP,PSMF1,HRAS,PSMB8,PSME3,PSME2,SPRED2,RASAL2,KRAS
1103	REACTOME_MRNA_DECAY_BY_5_TO_3_EXORIBONUCLEASE	0.6864	0.782089	0.315918	0.841949	428	15	PATL1,EDC4,XRN1
1104	REACTOME_THE_CANONICAL_RETINOID_CYCLE_IN_RODS_TWILIGHT_VISION	0.6848	0.781866	0.322673	0.841018	427	14	STRA6,CYP4V2,HSD17B1
1105	REACTOME_RUNX1_REGULATES_TRANSCRIPTION_OF_GENES_INVOLVED_IN_DIFFERENTIATION_OF_KERATINOCYTES	0.674497	0.774097	0.372613	0.839104	401	8	SOCS3,RUNX1,CTSV
1106	REACTOME_SIGNALING_BY_NOTCH1_HD_DOMAIN_MUTANTS_IN_CANCER	0.69637	0.791151	0.327491	0.836332	421	13	JAG1,NEURL1B,NOTCH1,MIB2
1107	REACTOME_CREB3_FACTORS_ACTIVATE_GENES	0.6843	0.78185	0.383584	0.835635	400	7	MBTPS1,CREB3L1,CREB3L2
1108	REACTOME_REGULATION_OF_TP53_ACTIVITY_THROUGH_PHOSPHORYLATION	0.776529	0.84928	0.220448	0.835295	621	89	TP53,HIPK2,CSNK2A2,NBN,TAF7,TAF4B,NOC2L,TAF4,STK11,MAPK14,MDM2,HUS1,BRIP1
1109	REACTOME_BRANCHED_CHAIN_AMINO_ACID_CATABOLISM	0.683077	0.781006	0.290947	0.832941	443	20	PPM1K,SLC25A44,MCCC2,ECHS1,IVD
1110	REACTOME_TRAFFICKING_AND_PROCESSING_OF_ENDOSOMAL_TLR	0.706376	0.798576	0.34559	0.827422	420	10	UNC93B1,TLR3,CTSV,LGMN
1111	REACTOME_INCRETIN_SYNTHESIS_SECRETION_AND_INACTIVATION	0.711375	0.803101	0.335852	0.821899	418	11	GNB1,TCF7L2
1112	REACTOME_SYNTHESIS_OF_PYROPHOSPHATES_IN_THE_CYTOSOL	0.705983	0.798576	0.354776	0.820505	412	9	ITPK1,NUDT3,IP6K1,NUDT4,IPPK
1113	REACTOME_METABOLISM_OF_COFACTORS	0.694357	0.789421	0.291805	0.816824	442	18	SPR,AKT1,GCH1,PDSS1,COQ7
1114	REACTOME_ASSEMBLY_AND_CELL_SURFACE_PRESENTATION_OF_NMDA_RECEPTORS	0.739259	0.825327	0.265306	0.814301	498	26	TUBB2A,CASK,GRIN3A,TUBB4B,TUBB6,DLG1,APBA1,TUBA3D,CAMK2G,CAMK2D,TUBA1C,DLG2
1115	REACTOME_CYCLIN_A_B1_B2_ASSOCIATED_EVENTS_DURING_G2_M_TRANSITION	0.724551	0.812849	0.269312	0.813605	483	25	WEE1,PPP2R1A,PPP2R2A,PPP2CB
1116	REACTOME_SURFACTANT_METABOLISM	0.710443	0.802611	0.293276	0.811515	448	17	GATA6,CKAP4,ABCA3,SLC34A2
1117	REACTOME_SYNTHESIS_OF_LIPOXINS_LX	0.691336	0.786541	0.413695	0.810667	382	5	LTC4S,HPGD,ALOX5
1118	REACTOME_CELL_CYCLE	0.945619	0.970492	0.181817	0.810355	938	635	WEE1,PRKACA,SUN2,TP53,CDKN1C,LMNA,EMD,CCND1,CDKN2B,RCC2,OPTN,PHLDA1,FBXL18,LPIN1,CSNK2A2,ABL1,DYNC1H1,PIAS4,TUBB2A,H2BC21,NBN,PSMA6,AJUBA,JAK2,POLR2A,KPNB1,CCND3,SRC,TUBG1,ZNF385A,POM121C,UBE2S,AKT1,CDK6,RCC1,PSMD3,PSMB9,FZR1,YWHAG,MASTL,CENPS,PPP2R1A,RANGAP1,LEMD2,CHMP4B,CHTF8,PSMB10,CDKN1A,CSNK1D,SMARCA5,TERF1,LIN52,RBBP7,PPP2R2A,RUVBL2,EP300,GAR1,CC2D1B,CCND2,CDKN1B,H2BC7,MDM2,PPP2CB,HUS1,PSMF…
1119	REACTOME_INHIBITION_OF_REPLICATION_INITIATION_OF_DAMAGED_DNA_BY_RB1_E2F1	0.722772	0.811419	0.316454	0.808148	437	13	PPP2R1A,PPP2CB,PPP2R3B,POLA2,PPP2CA,E2F1,TFDP1,TFDP2
1120	REACTOME_NEUROTRANSMITTER_RELEASE_CYCLE	0.744557	0.828944	0.255969	0.807973	512	29	ABAT,CASK,DNAJC5,STXBP1,STX1A,RAB3A,PPFIA1,APBA1,GLS,SLC1A3,VAMP2
1121	REACTOME_ALPHA_PROTEIN_KINASE_1_SIGNALING_PATHWAY	0.731749	0.819213	0.329822	0.807142	430	11	TAB1,TAB2,TAB3
1122	REACTOME_SUPPRESSION_OF_PHAGOSOMAL_MATURATION	0.744108	0.828944	0.323809	0.806831	441	12	KPNB1,CORO1A,VPS33B
1123	REACTOME_SIGNALING_BY_FGFR2_IN_DISEASE	0.754386	0.833699	0.252074	0.801838	515	30	GTF2F1,GRB2,POLR2A,FGF1,HRAS,POLR2D,KRAS,PIK3CA
1124	REACTOME_MULTIFUNCTIONAL_ANION_EXCHANGERS	0.726962	0.81442	0.367853	0.801367	425	7	SLC26A4,SLC26A11,SLC26A9
1125	REACTOME_CELL_CYCLE_MITOTIC	0.943205	0.970308	0.180605	0.801004	929	515	WEE1,PRKACA,TP53,CDKN1C,LMNA,EMD,CCND1,CDKN2B,RCC2,OPTN,PHLDA1,FBXL18,LPIN1,CSNK2A2,ABL1,DYNC1H1,TUBB2A,H2BC21,PSMA6,AJUBA,JAK2,KPNB1,CCND3,SRC,TUBG1,POM121C,UBE2S,AKT1,CDK6,RCC1,PSMD3,PSMB9,FZR1,YWHAG,MASTL,CENPS,PPP2R1A,RANGAP1,LEMD2,CHMP4B,PSMB10,CDKN1A,CSNK1D,LIN52,PPP2R2A,EP300,CC2D1B,CCND2,CDKN1B,H2BC7,PPP2CB,PSMF1,RAB1B,DYNLL2,H4C4,PTK6,H2BC6,DYRK1A,H3C13,ANKLE2,NUP188,PSMB8,PPP2R5B,CHMP7,…
1126	REACTOME_UPTAKE_AND_FUNCTION_OF_DIPHTHERIA_TOXIN	0.73913	0.825327	0.389288	0.795042	407	6	EEF2,HBEGF
1127	REACTOME_TOXICITY_OF_BOTULINUM_TOXIN_TYPE_D_BOTD	0.748614	0.831736	0.4645	0.784596	404	3	SV2C,VAMP2
1128	REACTOME_SYNTHESIS_OF_UDP_N_ACETYL_GLUCOSAMINE	0.74744	0.831005	0.358582	0.78117	437	7	RENBP,AMDHD2,NAGK
1129	REACTOME_SIGNALING_BY_RNF43_MUTANTS	0.74744	0.831005	0.357756	0.779369	437	7	FZD5,LRP5,FZD8
1130	REACTOME_PI_3K_CASCADE_FGFR2	0.760067	0.837529	0.324371	0.77662	452	10	GRB2,FGF1,PIK3CA
1131	REACTOME_GAP_JUNCTION_ASSEMBLY	0.784496	0.85509	0.269056	0.774999	505	21	TUBB2A,GJB2,TUBB4B,TUBB6,TUBA3D,GJC1,GJB6,TUBA1C,GJB5,TUBA1B,TUBA4A,GJB3
1132	REACTOME_VITAMIN_C_ASCORBATE_METABOLISM	0.751678	0.833511	0.343811	0.774244	447	8	CYB5R3,SLC2A1,SLC23A2,SLC23A1
1133	REACTOME_MEIOSIS	0.856061	0.914326	0.207166	0.773963	677	80	SUN2,LMNA,H2BC21,NBN,TERF1,H2BC7,H4C4,H2BC6,H3C13,TERF2IP,REC8,HSPA2
1134	REACTOME_RECOGNITION_AND_ASSOCIATION_OF_DNA_GLYCOSYLASE_WITH_SITE_CONTAINING_AN_AFFECTED_PURINE	0.826087	0.891086	0.236778	0.771702	569	36	H2BC21,TERF1,H2BC7,H4C4,H2BC6,TERF2IP
1135	REACTOME_GLUTATHIONE_SYNTHESIS_AND_RECYCLING	0.768456	0.843283	0.321829	0.770534	457	10	GGT6,CHAC1,GCLM,GSS,GCLC,GGCT,CNDP2
1136	REACTOME_SYNAPTIC_ADHESION_LIKE_MOLECULES	0.796296	0.86561	0.307632	0.766522	472	12	PTPRF,LRFN3,LRFN4,DLG1
1137	REACTOME_BIOTIN_TRANSPORT_AND_METABOLISM	0.780985	0.852416	0.313195	0.766453	459	11	PC,ACACA,MCCC2,HLCS
1138	REACTOME_BETA_OXIDATION_OF_HEXANOYL_COA_TO_BUTANOYL_COA	0.756318	0.833968	0.3908	0.765803	418	5	ACADS,ECHS1
1139	REACTOME_DISEASES_ASSOCIATED_WITH_SURFACTANT_METABOLISM	0.74955	0.832201	0.416436	0.764911	415	4	ABCA3,SLC34A2
1140	REACTOME_ACYL_CHAIN_REMODELLING_OF_PE	0.79845	0.867365	0.265539	0.76487	514	21	PLA2G4C,MBOAT2,PLA2G4E,LPCAT4,PLAAT2,MBOAT1,PLAAT3
1141	REACTOME_DIGESTION_OF_DIETARY_CARBOHYDRATE	0.772059	0.846113	0.495792	0.764015	419	2	MGAM,AMY2B
1142	REACTOME_HYALURONAN_BIOSYNTHESIS_AND_EXPORT	0.753153	0.833511	0.415165	0.762575	417	4	HAS2,HAS3
1143	REACTOME_DIGESTION	0.782609	0.85361	0.371907	0.759546	431	6	CEL,GUCY2C,MGAM
1144	REACTOME_ARMS_MEDIATED_ACTIVATION	0.768953	0.843283	0.386448	0.757275	425	5	CRK,RAP1A
1145	REACTOME_CONDENSATION_OF_PROMETAPHASE_CHROMOSOMES	0.787776	0.858084	0.308822	0.75575	463	11	CSNK2A2,NCAPD2,CSNK2A1,NCAPH,SMC2,NCAPG,SMC4,CCNB1,CDK1,CSNK2B,CCNB2
1146	REACTOME_RUNX3_REGULATES_IMMUNE_RESPONSE_AND_CELL_MIGRATION	0.763964	0.840673	0.408179	0.749744	423	4	RORC,RUNX3,CBFB
1147	REACTOME_IRAK4_DEFICIENCY_TLR2_4	0.808581	0.876008	0.293171	0.748687	489	13	TLR2,MYD88
1148	REACTOME_METABOLISM_OF_INGESTED_SEMET_SEC_MESEC_INTO_H2SE	0.777978	0.850287	0.381037	0.746672	430	5	CTH,SCLY,AHCY
1149	REACTOME_KINESINS	0.847914	0.908238	0.217523	0.745879	629	45	KIF13B,KIF26B,KIF1C,TUBB2A,KLC1,KIF19,KIF21B,TUBB4B,KLC2,TUBB6
1150	REACTOME_DOWNREGULATION_OF_ERBB4_SIGNALING	0.791453	0.861462	0.321565	0.743695	462	9	SRC,WWP1,NEDD4
1151	REACTOME_SENSORY_PERCEPTION_OF_SALTY_TASTE	0.767568	0.842912	0.404234	0.742498	425	4	SCNN1B,SCNN1A,SCNN1G
1152	REACTOME_PHENYLALANINE_METABOLISM	0.772973	0.846539	0.400858	0.736296	428	4	KYAT1,QDPR
1153	REACTOME_INACTIVATION_OF_CDC42_AND_RAC1	0.791946	0.861462	0.326824	0.735991	471	8	SRGAP1,SRGAP2,SLIT2,ARHGAP39
1154	REACTOME_BASE_EXCISION_REPAIR_AP_SITE_FORMATION	0.882591	0.931752	0.212118	0.722344	653	43	H2BC21,TERF1,UNG,H2BC7,H4C4,H2BC6,TERF2IP
1155	REACTOME_SYNTHESIS_OF_DIPHTHAMIDE_EEF2	0.800336	0.868243	0.320301	0.7213	476	8	EEF2,DPH1,DNAJC24
1156	REACTOME_ACYL_CHAIN_REMODELLING_OF_PG	0.818792	0.884691	0.300764	0.7201	487	10	LPCAT1,LPCAT4,PLA2G12A,PLA2G4F,LPGAT1,PLA2G4A,CRLS1,PLA2G10,PLA2R1,PLA2G3
1157	REACTOME_SUMOYLATION_OF_DNA_DAMAGE_RESPONSE_AND_REPAIR_PROTEINS	0.931904	0.964451	0.190326	0.709419	738	77	PML,CBX4,SP100,PIAS4,PHC2,POM121C,HDAC7,RING1,HERC2,NUP188,CDKN2A,NUP62,CBX8
1158	REACTOME_GLYCEROPHOSPHOLIPID_CATABOLISM	0.838768	0.900837	0.344716	0.704013	462	6	PNPLA6,GDPD3,GDPD5
1159	REACTOME_CYTOSOLIC_IRON_SULFUR_CLUSTER_ASSEMBLY	0.856436	0.914326	0.275409	0.703328	518	13	NUBP2,ERCC2,BRIP1
1160	REACTOME_JOSEPHIN_DOMAIN_DUBS	0.843803	0.904436	0.287086	0.70256	496	11	RAD23A,JOSD1,VCP,PRKN,RAD23B
1161	REACTOME_DEFECTIVE_GALNT3_CAUSES_HFTC	0.8624	0.918867	0.268016	0.698559	538	14	MUC20,MUC16,MUC21,MUC15
1162	REACTOME_TFAP2A_ACTS_AS_A_TRANSCRIPTIONAL_REPRESSOR_DURING_RETINOIC_ACID_INDUCED_CELL_DIFFERENTIATION	0.825225	0.891044	0.380176	0.698307	457	4	TFAP2A
1163	REACTOME_RELEASE_OF_HH_NP_FROM_THE_SECRETING_CELL	0.97053	0.986451	0.520095	0.695534	493	1	ADAM17
1164	REACTOME_MITOCHONDRIAL_FATTY_ACID_BETA_OXIDATION_OF_UNSATURATED_FATTY_ACIDS	0.849638	0.908999	0.337734	0.689755	468	6	ECI1
1165	REACTOME_MUSCARINIC_ACETYLCHOLINE_RECEPTORS	0.976424	0.987652	0.515563	0.689474	496	1	CHRM3
1166	REACTOME_INHIBITION_OF_DNA_RECOMBINATION_AT_TELOMERE	0.920378	0.958454	0.197087	0.680767	681	48	H2BC21,POLR2A,TERF1,H2BC7,H4C4,H2BC6,TERF2IP,POLR2D
1167	REACTOME_CALNEXIN_CALRETICULIN_CYCLE	0.903704	0.946086	0.220542	0.676909	609	26	PRKCSH,EDEM1,MAN1B1,SYVN1
1168	REACTOME_REGULATION_OF_GENE_EXPRESSION_IN_EARLY_PANCREATIC_PRECURSOR_CELLS	0.859519	0.91701	0.400108	0.67583	464	3	HNF1B,ONECUT3
1169	REACTOME_MISCELLANEOUS_SUBSTRATES	0.840604	0.901607	0.300025	0.67564	500	8	CYP4A11,CYP2U1,CYP4F3,CYP2S1
1170	REACTOME_FORMATION_OF_FIBRIN_CLOT_CLOTTING_CASCADE	0.88062	0.931752	0.2319	0.667974	567	21	SERPINE2,SERPING1,CD177,THBD,F3
1171	REACTOME_SENSING_OF_DNA_DOUBLE_STRAND_BREAKS	0.875	0.929219	0.325093	0.663938	482	6	NBN,KAT5
1172	REACTOME_POST_CHAPERONIN_TUBULIN_FOLDING_PATHWAY	0.88558	0.934296	0.242785	0.660495	564	16	TUBB2A,TBCD,TUBB4B,TUBB6,TUBA3D,TBCE
1173	REACTOME_CS_DS_DEGRADATION	0.880872	0.931752	0.275804	0.660339	524	10	CSPG4,IDUA,VCAN,ARSB,HEXA,HEXB
1174	REACTOME_ABACAVIR_METABOLISM	0.868468	0.9235	0.359351	0.660056	481	4	NT5C2
1175	REACTOME_ABACAVIR_TRANSPORT_AND_METABOLISM	0.882246	0.931752	0.322139	0.657905	486	6	NT5C2,SLC22A3,SLC22A1
1176	REACTOME_STING_MEDIATED_INDUCTION_OF_HOST_IMMUNE_RESPONSES	0.9008	0.945876	0.251628	0.655844	562	14	TRIM21,IRF3,IFI16,DTX4,STAT6,PRKDC
1177	REACTOME_PINK1_PRKN_MEDIATED_MITOPHAGY	0.897674	0.944044	0.227328	0.654804	578	21	TOMM40,PINK1,MAP1LC3A,SQSTM1
1178	REACTOME_DEFECTS_OF_CONTACT_ACTIVATION_SYSTEM_CAS_AND_KALLIKREIN_KININ_SYSTEM_KKS	0.882051	0.931752	0.282507	0.653366	515	9	SERPING1,GGCX,VWF,F12,GP1BA
1179	REACTOME_REPRODUCTION	0.976658	0.987652	0.169598	0.650102	794	93	SUN2,LMNA,H2BC21,NBN,TERF1,H2BC7,H4C4,H2BC6,H3C13,TERF2IP,REC8,HSPA2
1180	REACTOME_NONHOMOLOGOUS_END_JOINING_NHEJ	0.950131	0.973084	0.18423	0.648429	723	54	PIAS4,H2BC21,NBN,H2BC7,H4C4,HERC2,H2BC6,DCLRE1C,KAT5
1181	REACTOME_RAS_ACTIVATION_UPON_CA2_INFLUX_THROUGH_NMDA_RECEPTOR	0.905941	0.947708	0.252811	0.645619	548	13	HRAS,KRAS,DLG1,RASGRF1,CAMK2G,CAMK2D,DLG2
1182	REACTOME_ACTIVATION_OF_AMPK_DOWNSTREAM_OF_NMDARS	0.901254	0.945876	0.230053	0.643965	574	18	TUBB2A,CAMKK2,TUBB4B,TUBB6,TUBA3D,PRKAB1,TUBA1C,PRKAG1,TUBA1B,TUBA4A,PRKAA1
1183	REACTOME_ASSEMBLY_OF_THE_ORC_COMPLEX_AT_THE_ORIGIN_OF_REPLICATION	0.951657	0.974028	0.191819	0.643756	688	41	H2BC21,KPNB1,H2BC7,H4C4,H2BC6,H3C13
1184	REACTOME_RA_BIOSYNTHESIS_PATHWAY	0.907524	0.948748	0.228833	0.640552	578	18	CYP26A1,DHRS4,ALDH1A3,RDH13,DHRS3,ALDH1A2,ADH4
1185	REACTOME_RHOBTB1_GTPASE_CYCLE	0.928788	0.963379	0.214908	0.632158	612	23	DBN1,VIM,CUL3,SPEN,CPSF7,ROCK1,RBBP6,PDE5A,ROCK2
1186	REACTOME_DEFECTIVE_FACTOR_IX_CAUSES_HEMOPHILIA_B	0.898336	0.944044	0.372871	0.629824	485	3	GGCX,GP1BA
1187	REACTOME_NEGATIVE_EPIGENETIC_REGULATION_OF_RRNA_EXPRESSION	0.97604	0.987652	0.168785	0.629127	773	77	H2BC21,POLR1A,BAZ2A,SAP130,SMARCA5,DNMT1,ERCC2,H2BC7,H4C4,H2BC6,H3C13,MBD2,UBTF,H3C6,SIRT1,SIN3B
1188	REACTOME_INSULIN_PROCESSING	0.932203	0.964451	0.214752	0.626499	604	22	ERO1A,CPE,SLC30A5,STX1A,EXOC7,EXOC8,CLTRN,VAMP2
1189	REACTOME_APEX1_INDEPENDENT_RESOLUTION_OF_AP_SITES_VIA_THE_SINGLE_NUCLEOTIDE_REPLACEMENT_PATHWAY	0.90273	0.946086	0.287552	0.62643	528	7	LIG3,PNKP
1190	REACTOME_GENE_AND_PROTEIN_EXPRESSION_BY_JAK_STAT_SIGNALING_AFTER_INTERLEUKIN_12_STIMULATION	0.95369	0.974252	0.193338	0.626212	658	34	CNN2,SOD2,PITPNA,SERPINB2,CFL1,PAK2,PSME2,BOLA2B,ARF1,LCP1
1191	REACTOME_TRANSCRIPTIONAL_REGULATION_BY_E2F6	0.95369	0.974252	0.192338	0.622974	658	34	EHMT1,APAF1,EHMT2,RBBP7,RING1,CBX5,MAX,EED,PCGF2
1192	REACTOME_POST_TRANSLATIONAL_MODIFICATION_SYNTHESIS_OF_GPI_ANCHORED_PROTEINS	0.976501	0.987652	0.173057	0.622899	747	62	PLAUR,GPAA1,LY6E,MELTF,ALPL,PIGS
1193	REACTOME_POLYMERASE_SWITCHING_ON_THE_C_STRAND_OF_THE_TELOMERE	0.953593	0.974252	0.203298	0.614174	636	25	CHTF8,TERF1,CTC1,TERF2IP,POLD2,TERF2
1194	REACTOME_SODIUM_COUPLED_PHOSPHATE_COTRANSPORTERS	0.913514	0.952829	0.330861	0.607726	506	4	SLC34A2,SLC20A1
1195	REACTOME_TELOMERE_EXTENSION_BY_TELOMERASE	0.949153	0.9727	0.207801	0.60622	615	22	TERF1,RUVBL2,GAR1,TERF2IP,PIF1,TERF2
1196	REACTOME_CYTOSOLIC_SULFONATION_OF_SMALL_MOLECULES	0.938871	0.968324	0.212921	0.596011	598	18	SULT1C2,PODXL2,SLC35B2,SULT2B1
1197	REACTOME_RUNX1_REGULATES_TRANSCRIPTION_OF_GENES_INVOLVED_IN_BCR_SIGNALING	0.924324	0.961942	0.323502	0.594209	512	4	RUNX1,CBFB
1198	REACTOME_NA_CL_DEPENDENT_NEUROTRANSMITTER_TRANSPORTERS	0.931741	0.964451	0.271031	0.59044	545	7	SLC6A9,SLC6A20,SLC6A6,SLC22A1,SLC6A15
1199	REACTOME_METABOLISM_OF_AMINE_DERIVED_HORMONES	0.925993	0.962003	0.300727	0.589297	512	5	DUOX2,SLC5A5
1200	REACTOME_THYROXINE_BIOSYNTHESIS	0.925993	0.962003	0.300727	0.589297	512	5	DUOX2,SLC5A5
1201	REACTOME_EICOSANOIDS	0.935154	0.966345	0.269008	0.586033	547	7	CYP4A11,TBXAS1,CYP4F3
1202	REACTOME_GENERATION_OF_SECOND_MESSENGER_MOLECULES	0.962791	0.97982	0.202909	0.584466	620	21	VASP,ENAH,PAK2,HLA-DPB1
1203	REACTOME_PHOSPHATE_BOND_HYDROLYSIS_BY_NTPDASE_PROTEINS	0.926174	0.962003	0.258856	0.582931	551	8	ENTPD6,ENTPD5,ENTPD2
1204	REACTOME_PHOSPHORYLATION_OF_EMI1	0.943841	0.970343	0.283901	0.579812	520	6	FZR1,CDC20
1205	REACTOME_INTERCONVERSION_OF_NUCLEOTIDE_DI_AND_TRIPHOSPHATES	0.969027	0.985544	0.185175	0.57552	656	28	NME4,GSR,DCTPP1,AK1
1206	REACTOME_HIGHLY_CALCIUM_PERMEABLE_POSTSYNAPTIC_NICOTINIC_ACETYLCHOLINE_RECEPTORS	0.946396	0.970492	0.337583	0.570218	511	3	CHRNB2,CHRNA7
1207	REACTOME_SYNTHESIS_OF_5_EICOSATETRAENOIC_ACIDS	0.938567	0.968324	0.261631	0.569961	549	7	LTC4S,GPX4,ALOX5,GPX1,PON3
1208	REACTOME_MAP3K8_TPL2_DEPENDENT_MAPK1_3_ACTIVATION	0.942006	0.969933	0.209385	0.569633	600	16	NFKB1,TNIP2,MAP3K8,IKBKG,MAP2K1
1209	REACTOME_NTRK2_ACTIVATES_RAC1	0.942238	0.969933	0.288742	0.565811	521	5	FYN,DOCK3
1210	REACTOME_TANDEM_PORE_DOMAIN_POTASSIUM_CHANNELS	0.961183	0.979013	0.316615	0.5348	519	3	KCNK6,KCNK7
1211	REACTOME_ETHANOL_OXIDATION	0.976431	0.987652	0.213025	0.530791	579	12	ALDH2,ACSS2,ACSS1,ADH4,ALDH1B1
1212	REACTOME_METABOLISM_OF_STEROID_HORMONES	0.978788	0.987652	0.178344	0.524606	645	23	FDXR,HSD11B2,HSD17B1,STARD3,STARD4,HSD17B14,TSPO,AKR1B15
1213	REACTOME_ACETYLCHOLINE_BINDING_AND_DOWNSTREAM_EVENTS	0.98018	0.987652	0.280392	0.515025	543	4	CHRNB2,CHRNG,CHRNA7
1214	REACTOME_RRNA_MODIFICATION_IN_THE_MITOCHONDRION	0.960751	0.979013	0.233791	0.509312	562	7	NSUN4,MTERF4,TFB1M,MRM1,MT-RNR1,MT-RNR2,MRM3
1215	REACTOME_VITAMIN_B1_THIAMIN_METABOLISM	0.98018	0.987652	0.277052	0.508889	543	4	THTPA,SLC19A2,TPK1
1216	REACTOME_HEME_DEGRADATION	0.979487	0.987652	0.213145	0.492948	572	9	HMOX1,UGT1A1,ABCC1
1217	REACTOME_LONG_TERM_POTENTIATION	0.989899	0.994219	0.194471	0.484562	587	12	SRC,DLG1,CAMK2G,CAMK2D,DLG2
1218	REACTOME_ESTROGEN_BIOSYNTHESIS	0.987365	0.992912	0.242832	0.475849	546	5	HSD17B1,HSD17B14,AKR1B15
1219	REACTOME_ALPHA_DEFENSINS	0.994485	0.997581	0.288466	0.444525	540	2	PRSS3,CD4
1220	REACTOME_XENOBIOTICS	0.995298	0.997775	0.150961	0.422571	634	18	CYP1A1,CYP2C9,CYP2J2,CYP2A6,CYP2A13,CYP2S1,CYP2E1,ARNT2,CYP3A5
1221	REACTOME_FATTY_ACIDS	0.998302	1	0.166879	0.408388	587	11	CYP4A11,CYP2J2,CYP4F3,CYP2A13
1222	REACTOME_SCAVENGING_BY_CLASS_F_RECEPTORS	1	1	0.174413	0.356203	551	6	HYOU1,APOB,CALR
1223	REACTOME_HISTIDINE_CATABOLISM	1	1	-0.201047	-0.41662	447	5	HDC,HAL,HNMT,CARNMT1,CARNS1
1224	REACTOME_REGULATION_OF_TLR_BY_ENDOGENOUS_LIGAND	1	1	-0.151984	-0.453024	376	14	CD14,HMGB1,CD36,S100A1,GSDME,TLR1,TLR4
1225	REACTOME_GALACTOSE_CATABOLISM	0.988839	0.993774	-0.22986	-0.476329	442	5	PGM2,PGM2L1,GALT,GALK1,GALE
1226	REACTOME_REGULATION_OF_SIGNALING_BY_NODAL	0.979866	0.987652	-0.25634	-0.496324	437	4	ACVR2B,ACVR2A,ACVR1B,ACVR1C
1227	REACTOME_SUMO_IS_TRANSFERRED_FROM_E1_TO_E2_UBE2I_UBC9	0.985577	0.991733	-0.21974	-0.510615	409	7	SUMO2,UBA2,RWDD3,SAE1,SUMO1,UBE2I,SUMO3
1228	REACTOME_ACTIVATION_OF_PPARGC1A_PGC_1ALPHA_BY_PHOSPHORYLATION	0.973621	0.987652	-0.20951	-0.535178	405	9	PRKAA2
1229	REACTOME_PHASE_4_RESTING_MEMBRANE_POTENTIAL	0.978365	0.987652	-0.230371	-0.535318	406	7	KCNK1,KCNK5,KCNJ2,KCNJ14,KCNK15,KCNK7,KCNK6
1230	REACTOME_PREGNENOLONE_BIOSYNTHESIS	0.975369	0.987652	-0.203761	-0.536333	395	10	FDX1,STARD3NL,CYP11A1,TSPOAP1
1231	REACTOME_G0_AND_EARLY_G1	0.984472	0.99124	-0.152377	-0.538215	316	27	E2F5,RBBP4,PCNA,CDC6,MYBL2,CCNA2,CDK1
1232	REACTOME_RECYCLING_OF_EIF2_GDP	0.980296	0.987652	-0.227363	-0.546755	397	8	EIF2B3,EIF2B2,EIF2S1
1233	REACTOME_CLASS_C_3_METABOTROPIC_GLUTAMATE_PHEROMONE_RECEPTORS	0.961259	0.979013	-0.212177	-0.585219	396	11	GRM4,TAS2R14,GRM7,TAS1R1,TAS2R20,TAS2R5,GABBR1,TAS2R4,TAS2R3,TAS1R3,GRM6
1234	REACTOME_ACTIVATION_OF_RAC1_DOWNSTREAM_OF_NMDARS	0.94	0.968868	-0.262496	-0.590844	422	6	CALM1
1235	REACTOME_ACTIVATION_OF_CASPASES_THROUGH_APOPTOSOME_MEDIATED_CLEAVAGE	0.937778	0.968324	-0.262963	-0.591895	421	6	CASP3,CASP9,CYCS
1236	REACTOME_DEFECTIVE_FACTOR_VIII_CAUSES_HEMOPHILIA_A	0.903803	0.946086	-0.309731	-0.5997	403	4	TPST2,F8
1237	REACTOME_FGFR3_LIGAND_BINDING_AND_ACTIVATION	0.897092	0.944044	-0.312493	-0.605048	400	4	FGF17
1238	REACTOME_SIRT1_NEGATIVELY_REGULATES_RRNA_EXPRESSION	0.992857	0.996569	-0.153272	-0.609766	277	40	H2AJ,RRP8,H2AZ1,TBP,H3C10,H4C9,H3-3B,H3-3A,H2BC11,TAF1B,H3C8,H2BC5
1239	REACTOME_INTRINSIC_PATHWAY_OF_FIBRIN_CLOT_FORMATION	0.929293	0.963379	-0.207312	-0.613408	367	13	PROS1
1240	REACTOME_PREVENTION_OF_PHAGOSOMAL_LYSOSOMAL_FUSION	0.944844	0.970492	-0.240844	-0.615217	393	9	UBC,UBB,RAB7A,UBA52,RPS27A
1241	REACTOME_FGFR1_LIGAND_BINDING_AND_ACTIVATION	0.881432	0.931752	-0.320995	-0.621509	393	4	FGF17
1242	REACTOME_FGFR1C_LIGAND_BINDING_AND_ACTIVATION	0.881432	0.931752	-0.320995	-0.621509	393	4	FGF17
1243	REACTOME_SUMO_IS_CONJUGATED_TO_E1_UBA2_SAE1	0.895089	0.943093	-0.302497	-0.626851	400	5	SUMO2,UBA2
1244	REACTOME_AMPK_INHIBITS_CHREBP_TRANSCRIPTIONAL_ACTIVATION_ACTIVITY	0.915865	0.954372	-0.271837	-0.631674	380	7	PRKAA2,ADIPOR1
1245	REACTOME_CARGO_CONCENTRATION_IN_THE_ER	0.958991	0.979013	-0.172494	-0.633451	303	31	SEC22B,F5,SEC24B,SAR1B,CD59,TMED2,MIA3,CNIH1,CNIH3,MIA2,FOLR1,LMAN2L,TMED10,CTSC,LMAN1,F8,SEC23A
1246	REACTOME_COHESIN_LOADING_ONTO_CHROMATIN	0.913793	0.952829	-0.240733	-0.633652	370	10	PDS5B,SMC3,STAG2
1247	REACTOME_CYP2E1_REACTIONS	0.913793	0.952829	-0.241659	-0.636088	370	10	CYP2C8
1248	REACTOME_DOPAMINE_CLEARANCE_FROM_THE_SYNAPTIC_CLEFT	0.902386	0.946086	-0.364838	-0.638381	415	3	MAOA
1249	REACTOME_CHOLESTEROL_BIOSYNTHESIS	0.946108	0.970492	-0.186356	-0.643983	315	24	EBP,GGPS1,NSDHL,ARV1,FDPS,SQLE,CYP51A1,SC5D,IDI1
1250	REACTOME_FGFR2C_LIGAND_BINDING_AND_ACTIVATION	0.898048	0.944044	-0.368165	-0.644202	413	3	FGF17,FGFR2
1251	REACTOME_PURINE_RIBONUCLEOSIDE_MONOPHOSPHATE_BIOSYNTHESIS	0.910412	0.95115	-0.235503	-0.649555	375	11	PAICS,IMPDH2,PPAT,GART,ATIC
1252	REACTOME_FGFR3B_LIGAND_BINDING_AND_ACTIVATION	0.876356	0.930046	-0.375588	-0.657191	403	3	FGF17
1253	REACTOME_SMALL_INTERFERING_RNA_SIRNA_BIOGENESIS	0.894484	0.943072	-0.263175	-0.67226	372	9	TSNAX,PRKRA
1254	REACTOME_SMAC_XIAP_REGULATED_APOPTOTIC_RESPONSE	0.882212	0.931752	-0.289353	-0.672376	366	7	CASP3,CASP9,CYCS,DIABLO
1255	REACTOME_RESOLUTION_OF_D_LOOP_STRUCTURES_THROUGH_SYNTHESIS_DEPENDENT_STRAND_ANNEALING_SDSA	0.932722	0.964451	-0.190416	-0.67505	304	26	RAD51C,RAD51,RAD51B,BLM,WRN,MRE11
1256	REACTOME_NUCLEOTIDE_BIOSYNTHESIS	0.867374	0.922946	-0.226831	-0.676123	326	14	PAICS,DHODH,IMPDH2,PPAT
1257	REACTOME_CONDENSATION_OF_PROPHASE_CHROMOSOMES	0.96139	0.979013	-0.167996	-0.683579	248	45	H2AJ,PLK1,H2AZ1,H3C10,H4C9,H3-3B,RB1,H3-3A,H2BC11,NCAPD3,CDK1,H3C8,CCNB1,SMC4,H2BC5,H2AC6,H2AZ2,H2AC8,NCAPG2,H2AC20
1258	REACTOME_UBIQUINOL_BIOSYNTHESIS	0.869458	0.923943	-0.284566	-0.684314	352	8	COQ5,PDSS2,COQ9,COQ2,COQ3,COQ6,COQ7,PDSS1
1259	REACTOME_INITIAL_TRIGGERING_OF_COMPLEMENT	0.8523	0.911119	-0.250307	-0.690389	351	11	C1S,FCN3
1260	REACTOME_PROTEIN_REPAIR	0.84	0.901559	-0.30811	-0.693514	377	6	MSRB1
1261	REACTOME_PROCESSING_AND_ACTIVATION_OF_SUMO	0.849754	0.908999	-0.264209	-0.695443	344	10	SUMO2,SENP1,UBA2
1262	REACTOME_PHOSPHOLIPASE_C_MEDIATED_CASCADE_FGFR4	0.814318	0.881038	-0.362012	-0.700926	363	4	FGF17
1263	REACTOME_MODULATION_BY_MTB_OF_HOST_IMMUNE_SYSTEM	0.826667	0.891086	-0.312891	-0.704278	371	6	UBC,UBB,UBA52,RPS27A,B2M
1264	REACTOME_TRANSCRIPTION_OF_E2F_TARGETS_UNDER_NEGATIVE_CONTROL_BY_DREAM_COMPLEX	0.860724	0.917688	-0.221461	-0.715037	308	19	E2F5,RBBP4,PCNA,CDC6
1265	REACTOME_NEGATIVE_REGULATION_OF_NMDA_RECEPTOR_MEDIATED_NEURONAL_TRANSMISSION	0.830882	0.893559	-0.248649	-0.716255	338	12	CALM1,DLG4,GRIN1
1266	REACTOME_UREA_CYCLE	0.832512	0.894715	-0.300468	-0.722556	337	8	CPS1,ARG2,ARG1,NMRAL1,ASL,NAGS
1267	REACTOME_IRAK1_RECRUITS_IKK_COMPLEX	0.811671	0.878765	-0.245246	-0.731016	305	14	UBE2N,PELI2,UBC,UBB,UBE2V1,UBA52
1268	REACTOME_REVERSIBLE_HYDRATION_OF_CARBON_DIOXIDE	0.817734	0.884141	-0.304689	-0.732706	331	8	CA12,CA5B,CA1,CA2,CA3
1269	REACTOME_CASPASE_ACTIVATION_VIA_DEPENDENCE_RECEPTORS_IN_THE_ABSENCE_OF_LIGAND	0.805419	0.873169	-0.306158	-0.736238	326	8	MAGED1,CASP3,CASP9
1270	REACTOME_G1_S_SPECIFIC_TRANSCRIPTION	0.865815	0.921895	-0.205838	-0.739574	270	29	E2F5,RBBP4,PCNA,CDC6,RRM2,CDK1,TK1,RBL1,FBXO5,RBL2,LIN54,HDAC1,DHFR,E2F6,POLA1
1271	REACTOME_FORMATION_OF_APOPTOSOME	0.779661	0.851548	-0.273101	-0.753257	321	11	APIP,CARD8,CASP9,UACA,CYCS,DIABLO
1272	REACTOME_TRANSCRIPTION_OF_E2F_TARGETS_UNDER_NEGATIVE_CONTROL_BY_P107_RBL1_AND_P130_RBL2_IN_COMPLEX_WITH_HDAC1	0.826923	0.891086	-0.248639	-0.755464	300	16	E2F5,RBBP4,MYBL2,CCNA2,CDK1,RBL1,RBL2,LIN54
1273	REACTOME_FORMATION_OF_XYLULOSE_5_PHOSPHATE	0.761161	0.838161	-0.367505	-0.761565	340	5	DCXR,AKR1A1
1274	REACTOME_TRANSPORT_AND_SYNTHESIS_OF_PAPS	0.755556	0.833699	-0.338346	-0.761572	339	6	SLC26A2,PAPSS1
1275	REACTOME_ACTIVATED_NTRK2_SIGNALS_THROUGH_CDK5	0.74	0.825582	-0.341318	-0.768262	332	6	CDK5,BDNF,NTRK2
1276	REACTOME_MINERALOCORTICOID_BIOSYNTHESIS	0.829615	0.892792	-0.581701	-0.770465	408	1	LHB
1277	REACTOME_LYSINE_CATABOLISM	0.754902	0.833699	-0.271859	-0.783114	307	12	ALDH7A1,DLD,AASS,HYKK
1278	REACTOME_NRIF_SIGNALS_CELL_DEATH_FROM_THE_NUCLEUS	0.753316	0.833511	-0.257582	-0.785255	283	15	PSENEN,APH1B,PSEN1,UBC,MAPK8,UBB,UBA52
1279	REACTOME_REGULATION_OF_FZD_BY_UBIQUITINATION	0.753316	0.833511	-0.263555	-0.78559	283	14	FZD4,FZD6,USP8,LGR4,UBC,UBB,UBA52
1280	REACTOME_PROCESSING_OF_DNA_DOUBLE_STRAND_BREAK_ENDS	0.926829	0.962063	-0.169637	-0.79499	189	84	RPA3,BABAM2,RAD1,UBE2N,RFC2,BRCC3,RNF4,RHNO1,BLM,SUMO2,H4C9,WRN,TOPBP1,UBC,TP53BP1,UBB,MRE11,CCNA2,H2BC11,RPA2,UBA52,UBE2V2,UIMC1,TOP3A,H2BC5,RFC4,BRCA1,RAD9B,RAD9A,RAD17,RPS27A
1281	REACTOME_DNA_REPLICATION_INITIATION	0.70197	0.795886	-0.334427	-0.804219	284	8	POLE3,POLE2,PRIM2
1282	REACTOME_PURINE_SALVAGE	0.713235	0.803512	-0.280912	-0.809191	290	12	ADAL,GMPR2,DGUOK
1283	REACTOME_VXPX_CARGO_TARGETING_TO_CILIUM	0.739011	0.825327	-0.25652	-0.809402	268	18	CNGA4,RAB11A,EXOC6,ARF4,EXOC4,EXOC5,EXOC1,PKD1,EXOC2
1284	REACTOME_EICOSANOID_LIGAND_BINDING_RECEPTORS	0.673077	0.773414	-0.349028	-0.811045	279	7	CYSLTR1,LTB4R,LTB4R2
1285	REACTOME_MICRORNA_MIRNA_BIOGENESIS	0.775449	0.848674	-0.232933	-0.815413	258	25	POLR2K,POLR2B,POLR2C,POLR2H,POLR2J,PRKRA,POLR2L,RAN,MIR23B
1286	REACTOME_LECTIN_PATHWAY_OF_COMPLEMENT_ACTIVATION	0.700651	0.795453	-0.466999	-0.817137	322	3	FCN3
1287	REACTOME_SULFIDE_OXIDATION_TO_SULFATE	0.666667	0.769341	-0.365113	-0.821822	299	6	SUOX,TSTD1
1288	REACTOME_PHASE_1_INACTIVATION_OF_FAST_NA_CHANNELS	0.666667	0.769341	-0.366718	-0.825435	299	6	KCNIP2,KCNIP3,KCNIP4,KCND1,KCND3
1289	REACTOME_AGGREPHAGY	0.766773	0.842614	-0.219215	-0.826662	239	33	IFT88,DYNLL1,UBE2N,CFTR,PARK7,TUBA4B,HSP90AA1,TUBA1A,PCNT,UBC,UBB,DYNC1I2,UBE2V1
1290	REACTOME_SYNTHESIS_OF_PIPS_AT_THE_EARLY_ENDOSOME_MEMBRANE	0.714286	0.804133	-0.272761	-0.828754	259	16	FIG4,MTMR4,MTM1
1291	REACTOME_SUMOYLATION_OF_CHROMATIN_ORGANIZATION_PROTEINS	0.828194	0.891858	-0.187394	-0.828971	187	65	L3MBTL2,AAAS,NUP93,NUP133,RAE1,NUP85,NDC1,NUP37,NUP155,TPR,NUP54,SEH1L,SUMO2,H4C9,NUP35,NUP107,PHC1,RNF2,NUP43,NUP50,NUP98,NUP88
1292	REACTOME_HORMONE_LIGAND_BINDING_RECEPTORS	0.685466	0.782072	-0.474133	-0.82962	315	3	TSHR
1293	REACTOME_E2F_MEDIATED_REGULATION_OF_DNA_REPLICATION	0.764873	0.841099	-0.246624	-0.830105	269	22	ORC3,MCM8,RB1,PRIM2,ORC5,ORC4,CDK1,CCNB1
1294	REACTOME_G2_PHASE	0.669643	0.771118	-0.401608	-0.832234	299	5	CCNA2,CDK2,E2F3,CCNA1,E2F1
1295	REACTOME_FERTILIZATION	0.70202	0.795886	-0.282914	-0.837105	277	13	CATSPERD,IZUMO4
1296	REACTOME_ATF6_ATF6_ALPHA_ACTIVATES_CHAPERONES	0.681373	0.77961	-0.292373	-0.842206	277	12	XBP1
1297	REACTOME_ALPHA_LINOLENIC_OMEGA3_AND_LINOLEIC_OMEGA6_ACID_METABOLISM	0.670702	0.771787	-0.306692	-0.845908	276	11	ACOT8,SCP2,ELOVL5
1298	REACTOME_SUMO_IS_PROTEOLYTICALLY_PROCESSED	0.633333	0.746925	-0.375932	-0.846173	284	6	SUMO2,SENP1
1299	REACTOME_LIPID_PARTICLE_ORGANIZATION	0.668113	0.769907	-0.483801	-0.846538	307	3	HSD17B13,FITM2
1300	REACTOME_FLT3_SIGNALING_BY_CBL_MUTANTS	0.640625	0.752013	-0.412729	-0.855281	286	5	UBC,UBB,UBA52,RPS27A
1301	REACTOME_PEXOPHAGY	0.651332	0.756522	-0.312307	-0.861394	268	11	USP30,EPAS1,UBC,UBB,UBA52,NBR1,MAP1LC3B,RPS27A
1302	REACTOME_BIOSYNTHESIS_OF_MARESIN_LIKE_SPMS	0.635347	0.748752	-0.445057	-0.861717	283	4	CYP2C8
1303	REACTOME_TELOMERE_C_STRAND_LAGGING_STRAND_SYNTHESIS	0.664537	0.769087	-0.230541	-0.869372	207	33	RPA3,RFC2,POLD3,PCNA,POLD4,BLM,WRN,DSCC1,PRIM2,RPA2,FEN1
1304	REACTOME_CYTOCHROME_C_MEDIATED_APOPTOTIC_RESPONSE	0.631313	0.746182	-0.294964	-0.872757	249	13	APIP,CASP3,CARD8,CASP9,UACA,CYCS,DIABLO
1305	REACTOME_INTERLEUKIN_18_SIGNALING	0.600446	0.720804	-0.425181	-0.881083	268	5	IL4
1306	REACTOME_P2Y_RECEPTORS	0.595982	0.718121	-0.427465	-0.885817	266	5	LPAR6,P2RY1,P2RY11,P2RY6
1307	REACTOME_RESOLUTION_OF_D_LOOP_STRUCTURES	0.647975	0.7548	-0.239284	-0.89071	207	32	RAD51C,SPIDR,RAD51,RAD51B,BLM,WRN,MRE11,GEN1,TOP3A,EME2,BRCA1
1308	REACTOME_SYNTHESIS_OF_KETONE_BODIES	0.555556	0.685702	-0.395733	-0.890744	249	6	BDH2,ACAT1,BDH1
1309	REACTOME_TRANSLATION_OF_REPLICASE_AND_ASSEMBLY_OF_THE_REPLICATION_TRANSCRIPTION_COMPLEX	0.606061	0.725698	-0.30133	-0.891594	239	13	CHMP2A,BECN1,PIK3R4,CHMP2B,PIK3C3,CHMP3,CHMP6,MAP1LC3B
1310	REACTOME_DNA_DAMAGE_REVERSAL	0.583744	0.710735	-0.371053	-0.892296	236	8	ALKBH3,MGMT,FTO
1311	REACTOME_REDUCTION_OF_CYTOSOLIC_CA_LEVELS	0.560096	0.689316	-0.385033	-0.89471	232	7	CALM1,SRI
1312	REACTOME_ER_QUALITY_CONTROL_COMPARTMENT_ERQC	0.635854	0.748802	-0.270187	-0.895588	226	21	EDEM2,DERL2,TRIM13,RNF103,UBC,RNF185,UBB,RNF5,UBA52
1313	REACTOME_SIGNALING_BY_FGFR2_IIIA_TM	0.626374	0.743069	-0.284079	-0.89636	227	18	GTF2F2,POLR2K,POLR2B,POLR2C,POLR2H,NCBP2,POLR2J
1314	REACTOME_SIGNALLING_TO_P38_VIA_RIT_AND_RIN	0.644105	0.752272	-0.589448	-0.896842	294	2	RIT1,BRAF
1315	REACTOME_BIOLOGICAL_OXIDATIONS	0.8	0.868243	-0.173906	-0.899181	91	161	CYP39A1,ABHD10,NAT1,GSTP1,HSP90AB1,AKR7A2,PTGES3,MGST3,GSTZ1,CYP2C8,ABHD14B,AOC3,GSTA3,GSTK1,CHAC2,SLC26A2,CYP4B1,ADH6,FDX1,NQO2,AIP,BPHL,MTRR,GGT7,MAT2B,GSTM2,ADH1B,MAOA,AKR1A1,MAT2A,ADH5,GLYATL2,CYP46A1,PAPSS1,MGST2,ESD,ALDH1A1,CYP11A1,TPST2,CYP4F12,GSTM3,CYP2W1,CYB5B,BPNT1,CES1
1316	REACTOME_TYSND1_CLEAVES_PEROXISOMAL_PROTEINS	0.555288	0.685702	-0.388143	-0.901937	230	7	SCP2,AGPS,ACAA1,HSD17B4
1317	REACTOME_DISINHIBITION_OF_SNARE_FORMATION	0.574944	0.702225	-0.469816	-0.909656	256	4	STXBP3,PRKCG
1318	REACTOME_DEPOSITION_OF_NEW_CENPA_CONTAINING_NUCLEOSOMES_AT_THE_CENTROMERE	0.641667	0.752013	-0.21284	-0.916836	153	54	H2AJ,RUVBL1,CENPM,H2AZ1,CENPK,RBBP4,CENPN,CENPL,H4C9,CENPQ,NPM1,H2BC11,H2BC5,CENPP,CENPI,CENPX,RSF1,H2AC6,MIS18BP1,H2AZ2,KNL1,HJURP,CENPA,H2AC8,H2AC20,CENPO,H4C14
1319	REACTOME_UNBLOCKING_OF_NMDA_RECEPTORS_GLUTAMATE_BINDING_AND_ACTIVATION	0.556355	0.68576	-0.359504	-0.918326	231	9	CALM1,DLG4,GRIN1
1320	REACTOME_EARLY_PHASE_OF_HIV_LIFE_CYCLE	0.542929	0.673851	-0.311726	-0.922354	214	13	LIG4,XRCC5,XRCC4,XRCC6,PPIA,FEN1,CD4
1321	REACTOME_IRON_UPTAKE_AND_TRANSPORT	0.595331	0.718121	-0.218209	-0.92297	152	50	TF,CYBRD1,CUL1,ATP6V1D,ATP6V1E1,SKP1,CP,SLC40A1,ATP6V1G1,ATP6V0E1,NEDD8,FBXL5,UBC,ATP6V1C1,FTL,UBB,ATP6V0A4,HMOX2,UBA52,GLRX3,CAND1
1322	REACTOME_FGFR2B_LIGAND_BINDING_AND_ACTIVATION	0.511111	0.64435	-0.415969	-0.936291	229	6	FGF7,FGFBP2,FGFR2
1323	REACTOME_DEFECTS_IN_VITAMIN_AND_COFACTOR_METABOLISM	0.571429	0.700054	-0.282643	-0.936874	203	21	MCCC1,MMACHC,LMBRD1,MMAB,MMADHC,MTRR,PCCA,BTD
1324	REACTOME_ACTIVATION_OF_SMO	0.549072	0.679903	-0.308064	-0.939151	206	15	EFCAB7,GAS1,GAS8
1325	REACTOME_N_GLYCAN_TRIMMING_IN_THE_ER_AND_CALNEXIN_CALRETICULIN_CYCLE	0.572848	0.70126	-0.245951	-0.939418	172	35	UBXN1,EDEM2,DERL2,NGLY1,PSMC1,CANX,TRIM13,DERL1,RNF103,UBC,RNF185,UBB,RNF5,UBA52
1326	REACTOME_ATF6_ATF6_ALPHA_ACTIVATES_CHAPERONE_GENES	0.534483	0.665933	-0.35871	-0.944187	216	10	XBP1
1327	REACTOME_BASE_EXCISION_REPAIR	0.571429	0.700054	-0.208782	-0.945382	123	70	RPA3,H2AJ,MBD4,RFC2,POLB,POLD3,PARG,H2AZ1,TDG,APEX1,PCNA,POLD4,POLE3,H4C9,MUTYH,NEIL1
1328	REACTOME_SULFUR_AMINO_ACID_METABOLISM	0.526946	0.65858	-0.274165	-0.947422	175	24	SUOX,APIP,TXN2,MTRR,GOT1,TSTD1,BHMT,MTAP
1329	REACTOME_CAMK_IV_MEDIATED_PHOSPHORYLATION_OF_CREB	0.507389	0.642492	-0.394624	-0.948978	205	8	KPNA2,CALM1
1330	REACTOME_GLUCURONIDATION	0.5	0.637767	-0.32264	-0.954648	197	13	ABHD10
1331	REACTOME_DISEASES_OF_BASE_EXCISION_REPAIR	0.511161	0.64435	-0.461564	-0.956479	228	5	MUTYH,NEIL1
1332	REACTOME_NEUROFASCIN_INTERACTIONS	0.491111	0.633451	-0.425381	-0.957478	220	6	CNTNAP1,SDCBP
1333	REACTOME_RNA_POLYMERASE_III_TRANSCRIPTION_TERMINATION	0.520468	0.652129	-0.281209	-0.9586	177	23	CRCP,SSB,POLR2K,POLR3G,POLR2H,POLR1D,POLR3B,POLR3A,POLR2L,POLR3F
1334	REACTOME_COMPLEMENT_CASCADE	0.504587	0.64108	-0.270618	-0.959375	164	26	PROS1,C1S,CD55,FCN3,CLU,C5,C4BPA,CD59,CD46,C1R,C5AR1,C6,C9
1335	REACTOME_PHOSPHOLIPASE_C_MEDIATED_CASCADE_FGFR2	0.504464	0.64108	-0.464821	-0.963228	225	5	FGF17,FGF7
1336	REACTOME_RETROGRADE_TRANSPORT_AT_THE_TRANS_GOLGI_NETWORK	0.496212	0.636463	-0.229838	-0.970529	130	49	NAA38,NAPB,COG6,GCC2,TMF1,RABEPK,VAMP4,ARL1,GOLGA1,COG1,COG3,SCOC,SYS1,VPS52,COG2,NSF,STX10,VAMP3
1337	REACTOME_PROCESSIVE_SYNTHESIS_ON_THE_C_STRAND_OF_THE_TELOMERE	0.495822	0.636463	-0.30149	-0.97343	177	19	RPA3,POLD3,PCNA,POLD4,BLM,WRN,RPA2,FEN1
1338	REACTOME_ANDROGEN_BIOSYNTHESIS	0.464444	0.608486	-0.436758	-0.983085	208	6	SRD5A2,LHB,HSD17B12,SRD5A3,POMC,SRD5A1
1339	REACTOME_COMMON_PATHWAY_OF_FIBRIN_CLOT_FORMATION	0.491525	0.633478	-0.356699	-0.983835	202	11	PROS1,PF4V1,F5
1340	REACTOME_ASYMMETRIC_LOCALIZATION_OF_PCP_PROTEINS	0.497908	0.636969	-0.224988	-0.988197	118	61	PSMC4,FZD4,PSMD10,PSMD4,PSMC1,PSMB3,PSMD1,PSMB1,PSMD13,PRICKLE1,PSMD7,PSMD6,PSMC3,PSMC2,PSMC6,PSMB4,PSMD14,PSMD5,UBC,PSMA2,PSMA7,UBB,PSMA1,FZD3,PSMA3,UBA52,PSMB7,PSMD8,PSMC5,PSMA4,PSMA5
1341	REACTOME_BETA_OXIDATION_OF_VERY_LONG_CHAIN_FATTY_ACIDS	0.477833	0.620797	-0.376485	-0.990973	193	10	ACOT8,EHHADH
1342	REACTOME_ACTIVATION_OF_TRKA_RECEPTORS	0.513185	0.645387	-0.749312	-0.992465	252	1	NTRK2
1343	REACTOME_NGF_INDEPENDANT_TRKA_ACTIVATION	0.513185	0.645387	-0.749312	-0.992465	252	1	NTRK2
1344	REACTOME_2_LTR_CIRCLE_FORMATION	0.461538	0.607963	-0.427248	-0.992808	191	7	LIG4,XRCC5,XRCC4,XRCC6
1345	REACTOME_SYNTHESIS_OF_GDP_MANNOSE	0.473214	0.615293	-0.48087	-0.996487	211	5	GMPPA,PMM1
1346	REACTOME_NUCLEOTIDE_LIKE_PURINERGIC_RECEPTORS	0.453333	0.602574	-0.443424	-0.998089	203	6	LPAR6,P2RY1,P2RY11,ADORA2B,P2RY6
1347	REACTOME_IONOTROPIC_ACTIVITY_OF_KAINATE_RECEPTORS	0.451111	0.602574	-0.443716	-0.998746	202	6	CALM1,DLG4
1348	REACTOME_PROTEIN_METHYLATION	0.456757	0.605128	-0.323617	-1.0028	168	17	EEF1AKMT1,CALM1,HSPA8,CAMKMT,METTL21A,EEF1AKMT2,EEF1A1
1349	REACTOME_SUMOYLATION_OF_RNA_BINDING_PROTEINS	0.451737	0.602574	-0.243966	-1.00368	116	47	AAAS,NUP93,NUP133,RAE1,NUP85,NDC1,NUP37,NUP155,TPR,NUP54,SEH1L,SUMO2,NUP35,NUP107,PHC1,RNF2,NUP43,NUP50,NUP98,NUP88
1350	REACTOME_TRYPTOPHAN_CATABOLISM	0.45098	0.602574	-0.349582	-1.007	183	12	AFMID,KYNU,TDO2,SLC36A4
1351	REACTOME_CREB1_PHOSPHORYLATION_THROUGH_THE_ACTIVATION_OF_CAMKII_CAMKK_CAMKIV_CASCASDE	0.449519	0.601975	-0.435104	-1.01106	186	7	KPNA2,CALM1
1352	REACTOME_CARBOXYTERMINAL_POST_TRANSLATIONAL_MODIFICATIONS_OF_TUBULIN	0.426791	0.58071	-0.271647	-1.01118	136	32	AGBL2,LRRC49,TTLL9,TTLL5,AGTPBP1,TUBA4B,TTLL10,TTLL4,TUBA1A,AGBL3,SVBP,TTLL6
1353	REACTOME_NADE_MODULATES_DEATH_SIGNALLING	0.455357	0.604765	-0.488346	-1.01198	203	5	YWHAE,CASP3
1354	REACTOME_SUMOYLATION_OF_UBIQUITINYLATION_PROTEINS	0.412162	0.571423	-0.255843	-1.01289	121	39	AAAS,NUP93,NUP133,RAE1,NUP85,VHL,NDC1,NUP37,NUP155,TPR,NUP54,SEH1L,NUP35,NUP107,NUP43,NUP50,NUP98,NUP88,TRIM27
1355	REACTOME_RNA_POLYMERASE_II_TRANSCRIBES_SNRNA_GENES	0.433333	0.586146	-0.224643	-1.01509	90	72	INTS4,GTF2F2,GTF2A2,SNAPC1,SNAPC4,INTS10,POLR2K,POLR2B,POLR2C,CDK7,ELL2,POLR2H,TAF5,GTF2B,NCBP2,POLR2J,INTS8,TBP,CCNT1,INTS7,TAF13,ICE2,POLR2L,ZNF143,INTS14,RPRD1A,GTF2A1,SSU72,SNAPC5
1356	REACTOME_INTEGRATION_OF_PROVIRUS	0.419664	0.576904	-0.397449	-1.01525	174	9	LIG4,XRCC5,XRCC4,XRCC6,PPIA
1357	REACTOME_AFLATOXIN_ACTIVATION_AND_DETOXIFICATION	0.443627	0.596067	-0.352764	-1.01617	180	12	AKR7A2,MGST3,GGT7,MGST2
1358	REACTOME_UNWINDING_OF_DNA	0.443627	0.596067	-0.352807	-1.01629	180	12	MCM4,GINS3,MCM8,MCM3,MCM7,GINS4
1359	REACTOME_MEIOTIC_RECOMBINATION	0.423868	0.577957	-0.238831	-1.02016	102	53	RAD51C,RPA3,H2AJ,MLH1,RAD51,H2AZ1,BLM,CDK4,H3C10,H4C9,H3-3B,H3-3A,MRE11,H2BC11,RPA2,H3C8,TOP3A,H2BC5,BRCA1,H2AC6,H2AZ2,MSH5,H2AC8,RAD50,H2AC20,ATM,H4C14
1360	REACTOME_LIPOPHAGY	0.440887	0.59387	-0.425176	-1.02245	178	8	PRKAA2,HSPA8
1361	REACTOME_TELOMERE_MAINTENANCE	0.391534	0.552815	-0.21627	-1.02476	73	91	RPA3,H2AJ,SHQ1,RUVBL1,RFC2,POLD3,H2AZ1,POLR2K,POLR2B,POLR2C,NHP2,POLR2H,PCNA,POLD4,POLR2J,BLM,H4C9,WRN,PPP6C,H3-3B,DSCC1,H3-3A,PRIM2,NOP10,POLR2L,CCNA2,H2BC11,RPA2,DKC1,FEN1
1362	REACTOME_RNA_POLYMERASE_III_TRANSCRIPTION_INITIATION_FROM_TYPE_1_PROMOTER	0.425926	0.580023	-0.288353	-1.02911	137	28	CRCP,GTF3C6,POLR2K,POLR3G,POLR2H,TBP,POLR1D,POLR3B,POLR3A,POLR2L,GTF3A,POLR3F
1363	REACTOME_SYNTHESIS_OF_BILE_ACIDS_AND_BILE_SALTS_VIA_27_HYDROXYCHOLESTEROL	0.431034	0.584017	-0.391008	-1.0292	174	10	AKR1C1,AKR1C2,HSD3B7,AKR1C3
1364	REACTOME_NUCLEAR_ENVELOPE_BREAKDOWN	0.398374	0.559148	-0.241761	-1.03124	97	52	AAAS,NUP93,NUP133,PLK1,RAE1,NUP85,VRK1,NDC1,CCNB2,NUP37,NUP155,TPR,NUP54,SEH1L,NUP35,NUP107,NUP43,NUP50,NUP98,CDK1,CCNB1,NUP88
1365	REACTOME_MRNA_DECAY_BY_3_TO_5_EXORIBONUCLEASE	0.403846	0.563774	-0.340318	-1.03402	146	16	EXOSC5,EXOSC8,EXOSC1,HBS1L,WDR61,NT5C3B
1366	REACTOME_POSTMITOTIC_NUCLEAR_PORE_COMPLEX_NPC_REFORMATION	0.409938	0.569164	-0.292937	-1.03469	131	27	NUP93,NUP133,NUP85,NDC1,NUP37,NUP155,NUP54,SEH1L,NUP35,NUP107,RAN,NUP43,NUP98
1367	REACTOME_GLYCOGEN_SYNTHESIS	0.413793	0.572698	-0.339681	-1.03554	155	15	PGM1,PGM2,GBE1,UBC,UBB,UBA52,PGM2L1,UGP2,PPP1R3C,RPS27A
1368	REACTOME_PENTOSE_PHOSPHATE_PATHWAY	0.401515	0.561982	-0.350355	-1.03665	158	13	SHPK,PRPS1,PGD,PGM2,RBKS,DERA
1369	REACTOME_PYRUVATE_METABOLISM_AND_CITRIC_ACID_TCA_CYCLE	0.366255	0.530004	-0.243051	-1.03819	88	53	PDHX,MPC2,GSTZ1,MDH2,SUCLG1,DLD,SDHB,DLAT,PDHB,FH,SUCLA2,IDH3G,PDHA1,LDHA,ADHFE1,LDHAL6A,MPC1,NNT,VDAC1,GLO1
1370	REACTOME_BETA_OXIDATION_OF_PRISTANOYL_COA	0.418719	0.576544	-0.432023	-1.03892	169	8	ACOT8,SCP2,CROT,ACOX2,HSD17B4,ACOX3
1371	REACTOME_ACROSOME_REACTION_AND_SPERM_OOCYTE_MEMBRANE_BINDING	0.456332	0.605128	-0.68483	-1.04197	208	2	IZUMO4,CD9
1372	REACTOME_MITOCHONDRIAL_FATTY_ACID_BETA_OXIDATION	0.36755	0.530004	-0.273911	-1.04621	110	35	ACOT13,HADH,ACOT2,NDUFAB1,HADHB,ACBD7,ACBD6,HADHA,PCCA,PCTP
1373	REACTOME_RNA_POLYMERASE_III_TRANSCRIPTION	0.384892	0.545348	-0.26146	-1.04914	106	41	CRCP,SNAPC1,SSB,SNAPC4,GTF3C6,POLR2K,POLR3G,POLR2H,TBP,POLR1D,POLR3B,POLR3A,POLR2L,ZNF143,GTF3A,POLR3F,SNAPC5
1374	REACTOME_PROCESSING_OF_INTRONLESS_PRE_MRNAS	0.4039	0.563774	-0.325044	-1.04948	144	19	CPSF3,PAPOLA,CSTF1,NCBP2,CSTF3,NUDT21
1375	REACTOME_HDR_THROUGH_SINGLE_STRAND_ANNEALING_SSA	0.357595	0.521333	-0.267813	-1.05076	112	37	RPA3,RAD1,ERCC1,RFC2,RAD51,RHNO1,ERCC4,BLM,WRN,TOPBP1,MRE11,RPA2,TOP3A,RFC4,BRCA1,RAD9B,RAD9A,RAD17
1376	REACTOME_ERYTHROCYTES_TAKE_UP_OXYGEN_AND_RELEASE_CARBON_DIOXIDE	0.418345	0.576533	-0.543542	-1.0524	186	4	CA1,HBB,CA2,AQP1
1377	REACTOME_CYCLIN_A_CDK2_ASSOCIATED_EVENTS_AT_S_PHASE_ENTRY	0.353535	0.518712	-0.22568	-1.05517	69	85	MNAT1,CCNH,PSMC4,PSMD10,CUL1,PSMD4,PSMC1,PSMB3,PSMD1,PSMB1,E2F5,PSMD13,SKP1,RBBP4,CDK7,PSMD7,PSMD6,PSMC3,PSMC2,PSMC6,PSMB4,CDK4,PSMD14,PSMD5,UBC,RB1,PSMA2,PSMA7,UBB,PSMA1,CCNA2,PSMA3,UBA52,SKP2,PSMB7,PSMD8,PSMC5,PSMA4
1378	REACTOME_COBALAMIN_CBL_VITAMIN_B12_TRANSPORT_AND_METABOLISM	0.370879	0.530715	-0.347425	-1.05561	134	16	MMACHC,LMBRD1,MMAB,MMADHC,MTRR,TCN1,CUBN,TCN2,MMUT
1379	REACTOME_RNA_POLYMERASE_II_TRANSCRIPTION_TERMINATION	0.334802	0.498058	-0.239312	-1.05864	75	65	ZNF473,LSM10,EIF4A3,CPSF3,PAPOLA,CSTF1,SNRPF,MAGOH,ZC3H11A,NCBP2,UPF3B,SRRM1,SRSF6,SNRPD3,CSTF3,NUDT21,SRSF11,THOC3,SRSF7,CDC40,SRSF3,DDX39B,CLP1,THOC2,SLBP,THOC1,SRSF5,SNRPE
1380	REACTOME_REGULATION_OF_BACH1_ACTIVITY	0.399516	0.560157	-0.384212	-1.05972	164	11	CUL1,SKP1,UBC,UBB,RBX1,UBA52,SKP2
1381	REACTOME_CELLULAR_RESPONSE_TO_STARVATION	0.267176	0.426461	-0.206144	-1.06106	34	148	NPRL2,ATP6V1D,RPL18,LAMTOR5,RPS15,ATP6V1E1,RPL3L,RPL36AL,RPL26L1,RPL28,RPL8,RPS28,LAMTOR2,SESN1,RPL13,RPL19,ATP6V1G1,SEH1L,RPS16,RPS17,ATF2,ATP6V0E1,RPL3,SLC38A9,RPL13A,ATP6V1C1,RPL7A,RPL14,LAMTOR4,RPS19,RPS6,RPL22L1,RPS4X,RPS3A,RPL4,RPL12,RPL15,RPS26,RPLP1,RPL41,RPL27A,RPS14,RPL10A,RPS5,RPS24,UBA52,RPS23,EIF2S1,RPL5,RPL10,RPS3,RPL23,RPS20,RPS7,RPL36,RPS11,RPL7,RPL6,RPS25,RPS8,RPL17,EIF2AK4,RPL32…
1382	REACTOME_RNA_POLYMERASE_I_TRANSCRIPTION_TERMINATION	0.360248	0.522847	-0.301657	-1.06549	115	27	MNAT1,CCNH,POLR1E,POLR2K,CDK7,POLR2H,TBP,POLR1D,POLR2L,TAF1B,GTF2H2
1383	REACTOME_IRF3_MEDIATED_INDUCTION_OF_TYPE_I_IFN	0.392252	0.553343	-0.386946	-1.06726	161	11	NLRC3,XRCC5,XRCC6,MRE11
1384	REACTOME_KETONE_BODY_METABOLISM	0.365385	0.529348	-0.459345	-1.06739	151	7	BDH2,OXCT1,ACAT1
1385	REACTOME_LTC4_CYSLTR_MEDIATED_IL4_PRODUCTION	0.423581	0.577957	-0.702973	-1.06957	193	2	CYSLTR1
1386	REACTOME_REGULATION_OF_HMOX1_EXPRESSION_AND_ACTIVITY	0.33617	0.499604	-0.242847	-1.07136	78	63	PSMC4,PSMD10,CUL1,PSMD4,NFE2L2,PSMC1,PSMB3,PSMD1,PSMB1,PSMD13,SKP1,PSMD7,PSMD6,PSMC3,PSMC2,PSMC6,PSMB4,PSMD14,PSMD5,UBC,CSNK2B,PSMA2,PSMA7,UBB,PSMA1,RBX1,PSMA3,UBA52,SKP2,PSMB7,PSMD8,PSMC5,PSMA4,PSMA5
1387	REACTOME_HEDGEHOG_ON_STATE	0.319249	0.48292	-0.230472	-1.07245	67	78	PSMC4,PSMD10,EFCAB7,GAS1,GAS8,PSMD4,PSMC1,PSMB3,PSMD1,PSMB1,PSMD13,PSMD7,PSMD6,PSMC3,PSMC2,PSMC6,PSMB4,PSMD14,PSMD5,UBC,PSMA2,PSMA7,UBB,PSMA1,RBX1,KIF3A,PSMA3,UBA52,PSMB7,SPOP,PSMD8,PSMC5,PSMA4,PSMA5
1388	REACTOME_AUF1_HNRNP_D0_BINDS_AND_DESTABILIZES_MRNA	0.312757	0.47623	-0.251602	-1.07471	75	53	PSMC4,PSMD10,PSMD4,PSMC1,PSMB3,PSMD1,PSMB1,HSPA8,PSMD13,PSMD7,PSMD6,PSMC3,PSMC2,PSMC6,PSMB4,PSMD14,PSMD5,UBC,PSMA2,PSMA7,UBB,PSMA1,PSMA3,UBA52,PSMB7,PSMD8,PSMC5,PSMA4,PSMA5
1389	REACTOME_REGULATION_OF_PTEN_STABILITY_AND_ACTIVITY	0.295154	0.459414	-0.243527	-1.0796	66	66	PSMC4,PSMD10,PSMD4,PSMC1,PSMB3,PSMD1,PSMB1,PSMD13,PSMD7,PSMD6,PSMC3,PSMC2,PSMC6,USP13,PSMB4,PSMD14,PSMD5,UBC,CSNK2B,PSMA2,PSMA7,UBB,PSMA1,PSMA3,UBA52,PSMB7,PSMD8,PSMC5,PSMA4,TRIM27,PSMA5
1390	REACTOME_PASSIVE_TRANSPORT_BY_AQUAPORINS	0.359712	0.522847	-0.423536	-1.08189	149	9	AQP7,AQP6,AQP5,AQP4,AQP2,AQP1
1391	REACTOME_EXTENSION_OF_TELOMERES	0.325758	0.487275	-0.256445	-1.08288	85	49	RPA3,SHQ1,RUVBL1,RFC2,POLD3,NHP2,PCNA,POLD4,BLM,WRN,PPP6C,DSCC1,PRIM2,NOP10,CCNA2,RPA2,DKC1,FEN1
1392	REACTOME_DNA_DOUBLE_STRAND_BREAK_REPAIR	0.181818	0.327202	-0.211796	-1.09094	23	150	UBXN1,RAD51C,RPA3,BABAM2,TDP1,RAD1,ERCC1,KPNA2,UBE2N,RFC2,POLD3,BRCC3,SPIDR,RNF4,LIG4,RAD51,XRCC5,RAD51B,RHNO1,EYA1,ERCC4,PCNA,POLD4,TDP2,XRCC4,POLE3,BLM,EYA4,XRCC6,SUMO2,H4C9,WRN,TOPBP1,UBC,MAPK8,TP53BP1,POLE2,UBB,MRE11,CCNA2,H2BC11,POLQ,RPA2,PARP2,UBA52,FEN1,POLH,UBE2V2,GEN1,UIMC1,TOP3A,H2BC5,EME2
1393	REACTOME_ESTABLISHMENT_OF_SISTER_CHROMATID_COHESION	0.355932	0.521279	-0.396046	-1.09236	146	11	CDCA5,PDS5B,SMC3,STAG2,ESCO1,RAD21
1394	REACTOME_RNA_POLYMERASE_I_PROMOTER_ESCAPE	0.257384	0.417207	-0.252424	-1.09328	60	59	MNAT1,H2AJ,CCNH,POLR1E,H2AZ1,POLR2K,CDK7,RRN3,POLR2H,CBX3,TBP,H3C10,H4C9,H3-3B,POLR1D,H3-3A,POLR2L,H2BC11,TAF1B,GTF2H2,H3C8,H2BC5,POLR1C,H2AC6,GTF2H5,H2AZ2
1395	REACTOME_AMINO_ACID_CONJUGATION	0.409978	0.569164	-0.625789	-1.09498	188	3	GLYATL2,ACSM1
1396	REACTOME_CONJUGATION_OF_BENZOATE_WITH_GLYCINE	0.409978	0.569164	-0.625789	-1.09498	188	3	GLYATL2,ACSM1
1397	REACTOME_STABILIZATION_OF_P53	0.271967	0.432515	-0.25438	-1.09581	64	55	PSMC4,PSMD10,PSMD4,PSMC1,PSMB3,PSMD1,PSMB1,PSMD13,PSMD7,PSMD6,PSMC3,PSMC2,PSMC6,PSMB4,PSMD14,PSMD5,UBC,PSMA2,PSMA7,UBB,PSMA1,PSMA3,UBA52,PSMB7,PSMD8,PSMC5,PSMA4,PSMA5
1398	REACTOME_CITRIC_ACID_CYCLE_TCA_CYCLE	0.29745	0.461206	-0.326394	-1.0986	104	22	MDH2,SUCLG1,DLD,SDHB,FH,SUCLA2,IDH3G,NNT,ME3,SDHD,IDH3B,DLST,CS,SUCLG2
1399	REACTOME_CYTOSOLIC_TRNA_AMINOACYLATION	0.323353	0.485896	-0.318114	-1.0993	107	24	AIMP1,RARS1,QARS1,DARS1,CARS1,NARS1,LARS1,AIMP2,FARSB
1400	REACTOME_RUNX1_REGULATES_TRANSCRIPTION_OF_GENES_INVOLVED_IN_DIFFERENTIATION_OF_HSCS	0.222857	0.376334	-0.233288	-1.10411	38	96	MNAT1,H2AJ,CCNH,PSMC4,PSMD10,PSMD4,PSMC1,MYB,PSMB3,PSMD1,PSMB1,H2AZ1,PSMD13,LMO1,CDK7,PSMD7,PSMD6,PSMC3,PSMC2,PSMC6,PSMB4,PSMD14,H3C10,H4C9,PSMD5,H3-3B,UBC,H3-3A,PSMA2,PSMA7,UBB,PSMA1,H2BC11,PSMA3,UBA52,PSMB7,H3C8,H2BC5,PSMD8,PSMC5,PSMA4
1401	REACTOME_PEROXISOMAL_LIPID_METABOLISM	0.296636	0.46083	-0.311681	-1.10495	96	26	ACOT8,SLC25A17,EHHADH,ALDH3A2,SLC27A2,HACL1,PECR,SCP2
1402	REACTOME_FICOLINS_BIND_TO_REPETITIVE_CARBOHYDRATE_STRUCTURES_ON_THE_TARGET_CELL_SURFACE	0.358079	0.521333	-0.728878	-1.10899	163	2	FCN3
1403	REACTOME_MITOCHONDRIAL_UNCOUPLING	0.369128	0.530004	-0.575782	-1.11483	164	4	SLC25A27,SLC25A14
1404	REACTOME_THE_FATTY_ACID_CYCLING_MODEL	0.369128	0.530004	-0.575782	-1.11483	164	4	SLC25A27,SLC25A14
1405	REACTOME_ANTIMICROBIAL_PEPTIDES	0.280864	0.442043	-0.313724	-1.11965	90	28	BPIFA1,BPIFB1,EPPIN,ATOX1,BPIFA2,CLU,ATP7A,S100A7,BPIFB4,PDZD11
1406	REACTOME_HOMOLOGY_DIRECTED_REPAIR	0.178344	0.323186	-0.224016	-1.12097	27	122	RAD51C,RPA3,BABAM2,RAD1,ERCC1,UBE2N,RFC2,POLD3,BRCC3,SPIDR,RNF4,RAD51,RAD51B,RHNO1,ERCC4,PCNA,POLD4,POLE3,BLM,SUMO2,H4C9,WRN,TOPBP1,UBC,TP53BP1,POLE2,UBB,MRE11,CCNA2,H2BC11,POLQ,RPA2,PARP2,UBA52,FEN1,POLH,UBE2V2,GEN1,UIMC1,TOP3A,H2BC5,EME2,RFC4
1407	REACTOME_LIGAND_RECEPTOR_INTERACTIONS	0.362416	0.52552	-0.579178	-1.1214	161	4	GAS1
1408	REACTOME_SLBP_DEPENDENT_PROCESSING_OF_REPLICATION_DEPENDENT_HISTONE_PRE_MRNAS	0.31477	0.47794	-0.407093	-1.12283	129	11	ZNF473,LSM10,SNRPF,NCBP2,SNRPD3,SLBP,SNRPE,SNRPG
1409	REACTOME_SODIUM_CALCIUM_EXCHANGERS	0.334821	0.498058	-0.544001	-1.12731	149	5	CALM1,SLC24A1,SRI
1410	REACTOME_RESOLUTION_OF_SISTER_CHROMATID_COHESION	0.163522	0.304196	-0.227902	-1.12869	25	115	DYNLL1,BUB3,NUP133,PLK1,CENPM,NUP85,CENPK,CDCA5,PDS5B,BIRC5,CCNB2,SKA1,NUP37,TUBA4B,CENPN,SMC3,CLASP2,SEH1L,CENPL,CKAP5,DSN1,TUBA1A,KIF18A,MAD2L1,CENPQ,DYNC1I2,NUP107,SKA2,KIF2C,CDCA8,STAG2,NUP43,NUP98,CDK1,CCNB1,B9D2,BUB1,ZWINT,ZW10,CENPF,CENPP,CENPI,SGO1,SGO2,NUDC,KNL1,ERCC6L,PPP2R1B,MAPRE1,CENPA,TUBAL3,RAD21,RPS27,ZWILCH,RANBP2,BUB1B,CENPE,CENPO,NUP160
1411	REACTOME_FORMATION_OF_TUBULIN_FOLDING_INTERMEDIATES_BY_CCT_TRIC	0.303621	0.466731	-0.349691	-1.12906	108	19	TCP1,CCT8,CCT5,CCT2,CCT6A,TUBA4B,CCT3,TUBA1A,CCT7
1412	REACTOME_PROPIONYL_COA_CATABOLISM	0.332589	0.496374	-0.545057	-1.1295	148	5	PCCA,MMUT,MCEE,MMAA
1413	REACTOME_SYNTHESIS_OF_EPOXY_EET_AND_DIHYDROXYEICOSATRIENOIC_ACIDS_DHET	0.322222	0.485594	-0.502189	-1.13036	144	6	EPHX2,CYP2C8
1414	REACTOME_ASPARTATE_AND_ASPARAGINE_METABOLISM	0.316547	0.479734	-0.442696	-1.13083	131	9	FOLH1,NAALAD2,GOT1
1415	REACTOME_DETOXIFICATION_OF_REACTIVE_OXYGEN_SPECIES	0.280757	0.442043	-0.307948	-1.13088	88	31	NOX5,GSTP1,CAT,ATOX1,PRDX3,SOD1,GPX2,PRDX5,TXN2,PRDX2,PRDX1,PRDX6,ATP7A
1416	REACTOME_RNA_POLYMERASE_III_CHAIN_ELONGATION	0.263736	0.42285	-0.358738	-1.13193	95	18	CRCP,POLR2K,POLR3G,POLR2H,POLR1D,POLR3B,POLR3A,POLR2L,POLR3F
1417	REACTOME_DNA_REPAIR	0.0833333	0.189351	-0.202216	-1.13461	4	307	UBXN1,CETN2,USP45,RAD51C,RPA3,MNAT1,H2AJ,BABAM2,TDP1,CCNH,RAD1,COPS8,INO80B,ERCC1,KPNA2,UBE2N,RUVBL1,UFD1,MBD4,RFC2,MSH3,POLB,POLD3,NFRKB,DDB2,BRCC3,SPIDR,RNF4,MSH2,LIG4,MLH1,RAD51,PARG,PPIE,H2AZ1,TDG,COPS5,XRCC5,ALKBH3,RAD51B,POLR2K,POLR2B,RHNO1,APEX1,POLR2C,CDK7,CUL4A,USP1,ZNF830,POLR2H,EYA1,POLN,ERCC4,PCNA,FANCF,DCLRE1B,POLI,COPS7B,TFPT,POLD4,TDP2,WDR48,POLR2J,XRCC4,SPRTN,POLE3,BLM,USP10,EYA4,…
1418	REACTOME_BETA_OXIDATION_OF_LAUROYL_COA_TO_DECANOYL_COA_COA	0.330357	0.493697	-0.549366	-1.13843	147	5	HADH,HADHB,HADHA
1419	REACTOME_M_PHASE	0.0681818	0.165673	-0.201966	-1.14082	2	372	ODF2,CETN2,ANAPC5,DYNLL1,HAUS1,H2AJ,CDK5RAP2,AAAS,PSMC4,NUP93,PSMD10,CHMP2A,ENSA,YWHAE,TUBGCP5,PSMD4,BUB3,NME7,NUP133,CEP70,CEP41,PLK1,ANAPC10,RAE1,CCP110,CEP78,CENPM,PSMC1,HAUS8,SPAST,NUP85,PSMB3,ANAPC7,PSMD1,PSMB1,H2AZ1,PCM1,PSMD13,CENPK,CDCA5,CNTRL,VRK1,CEP290,AKAP9,PDS5B,PSMD7,BIRC5,NDC1,CCNB2,ANAPC11,PSMD6,PSMC3,SKA1,CEP57,NUP37,NUP155,TUBA4B,ANAPC4,HSP90AA1,TPR,PSMC2,CENPN,PSMC6,SMC3,NUP54,…
1420	REACTOME_RRNA_PROCESSING_IN_THE_MITOCHONDRION	0.285714	0.448185	-0.414116	-1.1422	117	11	HSD17B10,TRMT10C,MRM3,MT-RNR2,MT-RNR1,ELAC2,MRM1
1421	REACTOME_COOPERATION_OF_PREFOLDIN_AND_TRIC_CCT_IN_ACTIN_AND_TUBULIN_FOLDING	0.253823	0.413039	-0.323727	-1.14765	82	26	PFDN4,TCP1,CCT8,CCT5,PFDN1,CCT2,CCT6A,TUBA4B,PFDN5,CCT3,TUBA1A
1422	REACTOME_SIGNALING_BY_HEDGEHOG	0.139073	0.272562	-0.228347	-1.15034	20	129	IFT88,RPGRIP1L,WDR19,IFT52,PSMC4,INTU,PSMD10,CUL1,DYNC2H1,EFCAB7,GAS1,GAS8,PSMD4,MKS1,DERL2,PSMC1,PSMB3,IFT122,IFT57,PSMD1,PSMB1,TTC21B,PSMD13,SKP1,PRKAR1A,WDR35,PSMD7,PSMD6,PSMC3,PSMC2,PSMC6,IFT172,PSMB4,TUBA1A,PSMD14,PSMD5
1423	REACTOME_MRNA_CAPPING	0.240741	0.398186	-0.322997	-1.15274	77	28	MNAT1,CCNH,GTF2F2,POLR2K,POLR2B,POLR2C,CDK7,POLR2H,NCBP2,POLR2J
1424	REACTOME_OLFACTORY_SIGNALING_PATHWAY	0.322148	0.485594	-0.596273	-1.1545	143	4	GNAL,CNGA4
1425	REACTOME_SLC_TRANSPORTER_DISORDERS	0.147619	0.282501	-0.255855	-1.15613	30	72	SLC4A4,AAAS,NUP93,SLC35A3,NUP133,RAE1,NUP85,SLC26A2,CP,SLC33A1,NDC1,SLC7A9,SLC24A1,NUP37,NUP155,TPR,SLC20A2,SLC40A1,NUP54,SLC6A14,SEH1L
1426	REACTOME_DEGRADATION_OF_DVL	0.197531	0.347025	-0.270974	-1.15746	47	53	PSMC4,PSMD10,PSMD4,PSMC1,PSMB3,PSMD1,PSMB1,PSMD13,PSMD7,PSMD6,PSMC3,PSMC2,PSMC6,PSMB4,PSMD14,PSMD5,UBC,PSMA2,PSMA7,UBB,PSMA1,RBX1,PSMA3,UBA52,PSMB7,PSMD8,PSMC5,PSMA4,PSMA5
1427	REACTOME_CELLULAR_RESPONSE_TO_HYPOXIA	0.166667	0.307208	-0.256297	-1.15769	34	71	PSMC4,PSMD10,PSMD4,PSMC1,PSMB3,PSMD1,PSMB1,PSMD13,ELOB,HIF1A,PSMD7,VHL,PSMD6,PSMC3,EPAS1,PSMC2,PSMC6,PSMB4,PSMD14,PSMD5,UBC,PSMA2,PSMA7,UBB,PSMA1,ELOC,UBE2D1,RBX1,PSMA3,UBA52,PSMB7,PSMD8,PSMC5,PSMA4,PSMA5
1428	REACTOME_HIV_TRANSCRIPTION_INITIATION	0.189922	0.336966	-0.287914	-1.15873	48	44	MNAT1,CCNH,GTF2F2,GTF2A2,TAF9B,TAF10,POLR2K,POLR2B,POLR2C,CDK7,POLR2H,TAF5,GTF2B
1429	REACTOME_METABOLISM_OF_PORPHYRINS	0.238636	0.395518	-0.354778	-1.15914	83	20	HMBS,COX15,BLVRA,UROD,PPOX
1430	REACTOME_CHROMOSOME_MAINTENANCE	0.1375	0.270839	-0.232141	-1.16045	21	118	RPA3,H2AJ,SHQ1,RUVBL1,RFC2,POLD3,CENPM,H2AZ1,CENPK,POLR2K,POLR2B,RBBP4,POLR2C,NHP2,POLR2H,PCNA,CENPN,POLD4,POLR2J,CENPL,BLM,H4C9,WRN,PPP6C,H3-3B,CENPQ,DSCC1,H3-3A,PRIM2,NOP10,NPM1,POLR2L,CCNA2,H2BC11,RPA2,DKC1,FEN1,ATRX,H2BC5,RFC4,CENPP,CENPI,CENPX,RSF1,POT1,H2AC6,MIS18BP1,ANKRD28,H2AZ2,KNL1,HJURP,PPP6R3,CENPA,H2AC8,POLR2G
1431	REACTOME_FBXW7_MUTANTS_AND_NOTCH1_IN_CANCER	0.303571	0.466731	-0.560334	-1.16116	135	5	CUL1,SKP1,RBX1
1432	REACTOME_FGFR2_LIGAND_BINDING_AND_ACTIVATION	0.298077	0.461733	-0.499901	-1.16163	123	7	FGF17,FGF7,FGFBP2,FGFR2
1433	REACTOME_RESPONSE_TO_METAL_IONS	0.285714	0.448185	-0.483239	-1.16208	115	8	MT1G,MT3
1434	REACTOME_FGFR2_MUTANT_RECEPTOR_ACTIVATION	0.235795	0.391615	-0.356721	-1.16549	82	20	GTF2F2,FGF17,FGF7,POLR2K,POLR2B,POLR2C,POLR2H,NCBP2,POLR2J
1435	REACTOME_G2_M_CHECKPOINTS	0.112903	0.234693	-0.226307	-1.16623	13	152	RPA3,BABAM2,RAD1,PSMC4,ORC3,PSMD10,UBE2N,YWHAE,RFC2,PSMD4,BRCC3,PSMC1,PSMB3,PSMD1,PSMB1,PSMD13,RHNO1,PSMD7,CCNB2,PSMD6,PSMC3,PSMC2,PSMC6,BLM,MCM4,PSMB4,CDC6,PSMD14,H4C9,MCM8,PSMD5,WRN,TOPBP1,UBC,TP53BP1,PSMA2,PSMA7,UBB,YWHAQ,MRE11,PSMA1,H2BC11,ORC5,RPA2,ORC4,MCM3,PSMA3,UBA52,UBE2V2,DBF4,GTSE1,PSMB7,UIMC1,CDK1,CCNB1,TOP3A,H2BC5,PSMD8,PSMC5,PSMA4,MCM7,RFC4
1436	REACTOME_SIGNALING_BY_ROBO_RECEPTORS	0.0989011	0.21459	-0.216768	-1.16633	8	203	PSMC4,PSMD10,PSMD4,RPL18,RPS15,RPL3L,RPL36AL,EIF4A3,RPL26L1,PSMC1,RPL28,PSMB3,PSMD1,PSMB1,RPL8,PSMD13,ELOB,RPS28,PSMD7,MAGOH,COL4A5,PFN2,PSMD6,PSMC3,RPL13,RPL19,PSMC2,PSMC6,NCK1,NCBP2,UPF3B,CLASP2,RPS16,RPS17,PSMB4,PSMD14,PSMD5,RPL3,UBC,EVL,RPL13A,RPL7A,RPL14,PSMA2,PSMA7,RPS19,UBB,RPS6,PSMA1,RPL22L1,ELOC,RPS4X,RPS3A,RPL4,RPL12,RPL15,RBX1,RPS26,RPLP1,RPL41,RPL27A,RPS14,RPL10A,RPS5,PSMA3,RPS24,UBA5…
1437	REACTOME_BILE_ACID_AND_BILE_SALT_METABOLISM	0.198675	0.348277	-0.306316	-1.16998	59	35	AKR1C1,CYP39A1,ACOT8,SLC51B,AKR1C2,HSD3B7,SLC27A2,AKR1C3,SCP2
1438	REACTOME_METABOLISM_OF_POLYAMINES	0.15812	0.296543	-0.273216	-1.17049	36	57	PSMC4,PSMD10,PSMD4,AZIN1,PSMC1,PSMB3,PSMD1,PSMB1,PSMD13,PSMD7,PSMD6,PSMC3,PSMC2,PSMC6,PSMB4,PSMD14,PSMD5,SAT1,PSMA2,PSMA7,PSMA1,AMD1,PSMA3,PSMB7,PSMD8,PSMC5,PSMA4,PSMA5,OAZ3,SEM1,PSMB2
1439	REACTOME_UCH_PROTEINASES	0.164179	0.304364	-0.246911	-1.17126	32	89	PSMC4,INO80B,PSMD10,RUVBL1,PSMD4,NFRKB,PSMC1,PSMB3,PSMD1,PSMB1,PSMD13,PSMD7,PSMD6,PSMC3,TFPT,PSMC2,PSMC6,PSMB4,PSMD14,NEDD8,PSMD5,UBC,MBD6,PSMA2,PSMA7,UBB,PSMA1,ACTR8,PSMA3,UBA52,H2AC11,PSMB7,INO80E,PSMD8,PSMC5,UCHL1,PSMA4,PSMA5,INO80C,MCRS1,H2AC6,SEM1,PSMB2,RPS27A,ACTR5,ACTL6A
1440	REACTOME_CELL_CYCLE_CHECKPOINTS	0.0724638	0.172691	-0.213689	-1.1721	4	274	ANAPC5,DYNLL1,RPA3,BABAM2,RAD1,PSMC4,ORC3,PSMD10,UBE2N,YWHAE,RFC2,PSMD4,BUB3,NUP133,BRCC3,PLK1,ANAPC10,CENPM,PSMC1,NUP85,PSMB3,ANAPC7,PSMD1,PSMB1,PSMD13,CENPK,RHNO1,PSMD7,BIRC5,CCNB2,ANAPC11,PSMD6,PSMC3,SKA1,NUP37,ANAPC4,PSMC2,CENPN,PSMC6,CLASP2,SEH1L,CENPL,BLM,MCM4,CKAP5,PSMB4,CDC6,DSN1,PSMD14,H4C9,MCM8,PSMD5,WRN,KIF18A,TOPBP1,UBC,MAD2L1,CDC26,CENPQ,TP53BP1,UBE2E1,PSMA2,PSMA7,UBB,YWHAQ,MRE11,UBE…
1441	REACTOME_MITOTIC_TELOPHASE_CYTOKINESIS	0.260101	0.419862	-0.397522	-1.17621	102	13	PLK1,PDS5B,SMC3,KIF23,STAG2,KIF20A
1442	REACTOME_REGULATION_OF_PYRUVATE_DEHYDROGENASE_PDH_COMPLEX	0.233422	0.389278	-0.386544	-1.1784	87	15	PDHX,GSTZ1,DLD,DLAT,PDHB,PDHA1
1443	REACTOME_BETA_OXIDATION_OF_OCTANOYL_COA_TO_HEXANOYL_COA	0.28125	0.442043	-0.569748	-1.18066	125	5	HADH,HADHB,HADHA
1444	REACTOME_PROCESSING_OF_CAPPED_INTRONLESS_PRE_MRNA	0.20679	0.358986	-0.3321	-1.18523	66	28	ZNF473,LSM10,CPSF3,PAPOLA,CSTF1,SNRPF,NCBP2,SNRPD3,CSTF3,NUDT21
1445	REACTOME_FOLDING_OF_ACTIN_BY_CCT_TRIC	0.263547	0.42285	-0.451693	-1.18893	106	10	TCP1,CCT8,CCT5,CCT2,CCT6A,CCT3,CCT7
1446	REACTOME_HOMOLOGOUS_DNA_PAIRING_AND_STRAND_EXCHANGE	0.160584	0.299076	-0.29771	-1.1926	43	42	RAD51C,RPA3,RAD1,RFC2,RAD51,RAD51B,RHNO1,BLM,WRN,TOPBP1,MRE11,RPA2,TOP3A,RFC4,BRCA1,RAD9B,RAD9A,RAD17,PALB2,CHEK1,RAD50,ATM,RFC5
1447	REACTOME_CREATION_OF_C4_AND_C2_ACTIVATORS	0.276786	0.437949	-0.575629	-1.19285	123	5	C1S,FCN3,C1R
1448	REACTOME_DEFECTIVE_CSF2RB_CAUSES_SMDP5	0.257642	0.417207	-0.784635	-1.19382	117	2	SFTA3,CSF2RA
1449	REACTOME_MITOTIC_METAPHASE_AND_ANAPHASE	0.0675676	0.165177	-0.218925	-1.19569	4	223	ANAPC5,DYNLL1,PSMC4,NUP93,PSMD10,CHMP2A,PSMD4,BUB3,NUP133,PLK1,ANAPC10,CENPM,PSMC1,SPAST,NUP85,PSMB3,ANAPC7,PSMD1,PSMB1,PSMD13,CENPK,CDCA5,VRK1,PDS5B,PSMD7,BIRC5,NDC1,CCNB2,ANAPC11,PSMD6,PSMC3,SKA1,NUP37,NUP155,TUBA4B,ANAPC4,PSMC2,CENPN,PSMC6,SMC3,NUP54,CLASP2,SEH1L,CENPL,CKAP5,PSMB4,DSN1,TUBA1A,PSMD14,PSMD5,KIF18A,UBC,MAD2L1,NUP35,CDC26,CENPQ,UBE2E1,PSMA2,PSMA7,UBB,UBE2C,PSMA1,DYNC1I2,NUP107,UBE…
1450	REACTOME_TRANSCRIPTIONAL_REGULATION_BY_SMALL_RNAS	0.104265	0.221814	-0.258563	-1.19779	21	79	H2AJ,AAAS,NUP93,NUP133,RAE1,NUP85,H2AZ1,POLR2K,POLR2B,POLR2C,POLR2H,NDC1,NUP37,NUP155,TPR,NUP54,POLR2J,SEH1L,H3C10,H4C9,H3-3B,NUP35,H3-3A,NUP107,POLR2L,H2BC11,RAN,NUP43,NUP50,NUP98,H3C8,NUP88,H2BC5
1451	REACTOME_GAP_FILLING_DNA_REPAIR_SYNTHESIS_AND_LIGATION_IN_GG_NER	0.224551	0.378797	-0.342716	-1.19972	74	25	RPA3,RFC2,POLD3,PCNA,POLD4,POLE3,UBC,POLE2,UBB,RPA2,UBA52,RFC4,RPS27A,POLE4,RFC1,RFC5
1452	REACTOME_DISPLACEMENT_OF_DNA_GLYCOSYLASE_BY_APEX1	0.263789	0.42285	-0.470503	-1.20186	109	9	MBD4,TDG,APEX1,MUTYH
1453	REACTOME_INTERACTIONS_OF_REV_WITH_HOST_CELLULAR_PROTEINS	0.148734	0.283807	-0.30853	-1.21051	46	37	AAAS,NUP93,NUP133,RAE1,NUP85,NDC1,NUP37,NUP155,TPR,NUP54,SEH1L,NUP35,NPM1,NUP107,RAN,NUP43,NUP50,NUP98,NUP88
1454	REACTOME_POLYMERASE_SWITCHING	0.228117	0.383208	-0.406458	-1.21155	85	14	RFC2,POLD3,PCNA,POLD4,PRIM2
1455	REACTOME_GLYOXYLATE_METABOLISM_AND_GLYCINE_DEGRADATION	0.184659	0.331645	-0.371451	-1.21362	64	20	PDHX,LIPT1,DLD,NDUFAB1,DLAT,PDHB,LIPT2,PDHA1,DBT
1456	REACTOME_DISEASES_ASSOCIATED_WITH_N_GLYCOSYLATION_OF_PROTEINS	0.192308	0.340074	-0.399597	-1.21413	69	16	DPAGT1,ALG14,ALG8,MPDU1,ALG3
1457	REACTOME_MELANIN_BIOSYNTHESIS	0.229258	0.384723	-0.798309	-1.21462	104	2	OCA2
1458	REACTOME_INTERACTIONS_OF_VPR_WITH_HOST_CELLULAR_PROTEINS	0.14557	0.280518	-0.309592	-1.21467	45	37	AAAS,NUP93,NUP133,RAE1,NUP85,NDC1,NUP37,NUP155,TPR,NUP54,SEH1L,NUP35,NUP107,NUP43,NUP50,NUP98,NUP88
1459	REACTOME_SPERM_MOTILITY_AND_TAXES	0.248889	0.407507	-0.539901	-1.21525	111	6	CATSPERD
1460	REACTOME_DEFECTS_IN_COBALAMIN_B12_METABOLISM	0.209596	0.361133	-0.414297	-1.22585	82	13	MMACHC,LMBRD1,MMAB,MMADHC,MTRR,CUBN,TCN2,MMUT
1461	REACTOME_DISEASES_OF_DNA_REPAIR	0.141479	0.275269	-0.323773	-1.23441	43	34	RAD51C,MSH3,MSH2,MLH1,RAD51,RAD51B,BLM,MUTYH,WRN,NEIL1,MRE11
1462	REACTOME_HEDGEHOG_LIGAND_BIOGENESIS	0.10917	0.228237	-0.290069	-1.23547	24	56	PSMC4,PSMD10,PSMD4,DERL2,PSMC1,PSMB3,PSMD1,PSMB1,PSMD13,PSMD7,PSMD6,PSMC3,PSMC2,PSMC6,PSMB4,PSMD14,PSMD5,UBC,PSMA2,PSMA7,UBB,PSMA1,PSMA3,UBA52,PSMB7,PSMD8,PSMC5,PSMA4,PSMA5
1463	REACTOME_MITOCHONDRIAL_CALCIUM_ION_TRANSPORT	0.13881	0.272533	-0.367327	-1.23637	48	22	VDAC3,STOML2,PMPCB,MICU1,AFG3L2,MICU2
1464	REACTOME_SYNTHESIS_OF_GLYCOSYLPHOSPHATIDYLINOSITOL_GPI	0.164865	0.304864	-0.401146	-1.24304	60	17	PIGP,PIGC,PIGV
1465	REACTOME_MRNA_SPLICING_MINOR_PATHWAY	0.134146	0.266101	-0.291767	-1.24455	32	52	DDX23,GTF2F2,LSM2,ZCRB1,SNRNP40,SNU13,SNRPD1,POLR2K,POLR2B,POLR2C,SF3B6,POLR2H,SF3B5,SNRPF,SNRPD2,SNRNP25,NCBP2,POLR2J,SRSF6,SNRPD3,SF3B1
1466	REACTOME_ACTIVATION_OF_THE_MRNA_UPON_BINDING_OF_THE_CAP_BINDING_COMPLEX_AND_EIFS_AND_SUBSEQUENT_BINDING_TO_43S	0.092827	0.205701	-0.287827	-1.24661	21	59	RPS15,EIF3K,RPS28,RPS16,RPS17,EIF3C,EIF3M,EIF3I,RPS19,RPS6,RPS4X,RPS3A,EIF3L,RPS26,EIF3E,RPS14,RPS5,RPS24,RPS23,EIF2S1,EIF4A1,RPS3,RPS20,RPS7,RPS11,RPS25,RPS8,EIF3H,RPS13,RPS21,FAU,RPS27A,RPSA,RPS12,EIF4E,RPS27,RPS10,EIF4A2
1467	REACTOME_SYNTHESIS_OF_BILE_ACIDS_AND_BILE_SALTS	0.138889	0.272533	-0.350312	-1.25023	44	28	AKR1C1,CYP39A1,ACOT8,AKR1C2,HSD3B7,SLC27A2,AKR1C3,SCP2,CYP46A1,CH25H
1468	REACTOME_PROCESSING_OF_SMDT1	0.153846	0.289202	-0.414244	-1.25864	55	16	STOML2,PMPCB,MICU1,AFG3L2,MICU2,PHB,MAIP1
1469	REACTOME_FORMATION_OF_TC_NER_PRE_INCISION_COMPLEX	0.117886	0.242858	-0.295734	-1.26147	28	52	MNAT1,CCNH,COPS8,PPIE,COPS5,POLR2K,POLR2B,POLR2C,CDK7,CUL4A,ZNF830,POLR2H,COPS7B,POLR2J,TCEA1,UBC,GPS1,UBB,COPS4,ISY1,RBX1,POLR2L,UBA52,GTF2H2,ERCC8,ERCC6
1470	REACTOME_MITOTIC_G2_G2_M_PHASES	0.0235294	0.0783179	-0.238693	-1.26425	1	187	ODF2,CETN2,DYNLL1,HAUS1,MNAT1,CDK5RAP2,CCNH,PSMC4,HSP90AB1,PSMD10,CUL1,YWHAE,TUBGCP5,PSMD4,NME7,CEP70,CEP41,PLK1,CCP110,CEP78,PSMC1,HAUS8,PSMB3,PSMD1,PSMB1,PCM1,PSMD13,PPP1CB,SKP1,CNTRL,RBBP4,CEP290,CDK7,AKAP9,TPX2,FKBPL,PSMD7,CCNB2,PSMD6,PSMC3,CEP57,TUBA4B,HSP90AA1,PSMC2,PSMC6,NEK2,FOXM1,CKAP5,PSMB4,TUBA1A,PSMD14,LCMT1,HAUS4,PCNT,PSMD5,CEP63
1471	REACTOME_DNA_DAMAGE_RECOGNITION_IN_GG_NER	0.115894	0.239059	-0.321682	-1.2667	34	38	CETN2,COPS8,INO80B,RUVBL1,NFRKB,DDB2,COPS5,CUL4A,COPS7B,TFPT,UBC,GPS1,UBB,COPS4,RBX1,ACTR8,PARP2,UBA52,INO80E,COPS3,INO80C,MCRS1,RPS27A,ACTR5,ACTL6A
1472	REACTOME_GENE_SILENCING_BY_RNA	0.0357143	0.104967	-0.260444	-1.26801	5	106	H2AJ,TDRD6,AAAS,NUP93,TSNAX,NUP133,RAE1,NUP85,H2AZ1,HENMT1,ANG,POLR2K,POLR2B,POLR2C,POLR2H,NDC1,NUP37,NUP155,HSP90AA1,TPR,NUP54,POLR2J,SEH1L,PRKRA,H3C10,H4C9,H3-3B,NUP35,H3-3A,TDRD9,PIWIL4,NUP107,POLR2L,H2BC11,RAN,MIR23B,NUP43,NUP50,NUP98,H3C8,NUP88,H2BC5
1473	REACTOME_BETA_OXIDATION_OF_DECANOYL_COA_TO_OCTANOYL_COA_COA	0.191111	0.338702	-0.563888	-1.26924	85	6	HADH,HADHB,HADHA
1474	REACTOME_RRNA_MODIFICATION_IN_THE_NUCLEUS_AND_CYTOSOL	0.0769231	0.179599	-0.296187	-1.27341	17	58	BUD23,NOP56,UTP25,SNU13,MPHOSPH10,PWP2,NOL11,NHP2,UTP14A,EMG1,UTP11,RRP36,WDR43,DCAF13,RCL1,RPS6,NOP10,UTP20,WDR75,KRR1,RPS14,IMP4,DKC1,IMP3,DIMT1,RPS7,UTP6
1475	REACTOME_TRANSLESION_SYNTHESIS_BY_POLH	0.13649	0.269468	-0.396271	-1.27945	48	19	RPA3,UFD1,RFC2,PCNA,SPRTN,UBC,UBB,RPA2,UBA52,POLH,RFC4
1476	REACTOME_SCF_SKP2_MEDIATED_DEGRADATION_OF_P27_P21	0.0680851	0.165673	-0.295811	-1.28627	15	60	PSMC4,PSMD10,CUL1,PSMD4,PSMC1,PSMB3,PSMD1,PSMB1,PSMD13,SKP1,PSMD7,PSMD6,PSMC3,PSMC2,PSMC6,PSMB4,CDK4,PSMD14,PSMD5,UBC,PSMA2,PSMA7,UBB,PSMA1,CCNA2,PSMA3,UBA52,SKP2,PSMB7,PSMD8,PSMC5,PSMA4,PSMA5,CKS1B,SEM1,PSMB2,RPS27A
1477	REACTOME_BICARBONATE_TRANSPORTERS	0.187192	0.335074	-0.536135	-1.28928	75	8	SLC4A4,SLC4A9,SLC4A8,SLC4A7
1478	REACTOME_HEDGEHOG_OFF_STATE	0.035503	0.104753	-0.270698	-1.29309	5	101	IFT88,RPGRIP1L,WDR19,IFT52,PSMC4,INTU,PSMD10,CUL1,DYNC2H1,PSMD4,MKS1,PSMC1,PSMB3,IFT122,IFT57,PSMD1,PSMB1,TTC21B,PSMD13,SKP1,PRKAR1A,WDR35,PSMD7,PSMD6,PSMC3,PSMC2,PSMC6,IFT172,PSMB4,TUBA1A,PSMD14,PSMD5,UBC,PSMA2,PSMA7,UBB,PSMA1
1479	REACTOME_CROSS_PRESENTATION_OF_SOLUBLE_EXOGENOUS_ANTIGENS_ENDOSOMES	0.100386	0.215917	-0.318016	-1.29401	25	45	PSMC4,PSMD10,PSMD4,PSMC1,PSMB3,PSMD1,PSMB1,PSMD13,PSMD7,PSMD6,PSMC3,PSMC2,PSMC6,PSMB4,PSMD14,PSMD5,PSMA2,PSMA7,PSMA1,PSMA3,PSMB7,PSMD8,PSMC5,PSMA4,PSMA5
1480	REACTOME_MITOTIC_PROMETAPHASE	0.0114943	0.0469981	-0.244337	-1.29466	0	190	ODF2,CETN2,DYNLL1,HAUS1,CDK5RAP2,YWHAE,TUBGCP5,BUB3,NME7,NUP133,CEP70,CEP41,PLK1,CCP110,CEP78,CENPM,HAUS8,NUP85,PCM1,CENPK,CDCA5,CNTRL,CEP290,AKAP9,PDS5B,BIRC5,CCNB2,SKA1,CEP57,NUP37,TUBA4B,HSP90AA1,CENPN,SMC3,NEK2,CLASP2,SEH1L,CENPL,CKAP5,DSN1,TUBA1A,HAUS4,PCNT,CEP63,KIF18A,MAD2L1,CSNK2B,CEP152,CENPQ,DYNC1I2,NUP107,SKA2,CEP250,KIF2C,CDCA8,TUBB,STAG2,NUP43,NUP98,CDK1,CCNB1,MZT1,SMC4,B9D2,BUB1,ZWI…
1481	REACTOME_ACTIVATION_OF_NIMA_KINASES_NEK9_NEK6_NEK7	0.180288	0.325246	-0.559319	-1.2997	74	7	PLK1,CCNB2,CDK1,CCNB1
1482	REACTOME_PROCESSING_OF_CAPPED_INTRON_CONTAINING_PRE_MRNA	0.0142857	0.0546658	-0.23861	-1.3022	0	238	DDX23,SNRPA1,PPIL6,AAAS,SYF2,NUP93,USP39,GLE1,GTF2F2,SF3A3,BCAS2,NUP133,LSM2,RAE1,ZCRB1,SNRNP40,EIF4A3,CPSF3,PAPOLA,CWC15,NUP85,PPIE,SNU13,SNRNP27,SNRPD1,HSPA8,SNW1,PPIL4,NXT1,POLR2K,POLR2B,SNRPA,PPWD1,CSTF1,POLR2C,LSM8,PQBP1,SF3B6,POLR2H,SF3B5,SNRPF,MAGOH,NDC1,SNRPB2,NUP37,ZC3H11A,NUP155,SNRPD2,TPR,CCAR1,SNRNP25,GPKOW,LSM3,NCBP2,NUP54,DDX5,UPF3B,DNAJC8,PRPF38A,POLR2J,SRRM1,RBM5,SEH1L,HNRNPF,SRSF…
1483	REACTOME_CONVERSION_FROM_APC_C_CDC20_TO_APC_C_CDH1_IN_LATE_ANAPHASE	0.102273	0.218887	-0.399898	-1.30656	35	20	ANAPC5,ANAPC10,ANAPC7,ANAPC11,ANAPC4,CDC26,UBE2E1,UBE2C,UBE2D1,ANAPC16,ANAPC1
1484	REACTOME_SUMOYLATION_OF_DNA_REPLICATION_PROTEINS	0.0780669	0.18148	-0.31923	-1.31256	20	46	AAAS,NUP93,NUP133,RAE1,NUP85,BIRC5,NDC1,PCNA,NUP37,NUP155,TPR,NUP54,SEH1L,SUMO2,NUP35,NUP107,CDCA8,NUP43,AURKA,NUP50,NUP98,NUP88
1485	REACTOME_LAGGING_STRAND_SYNTHESIS	0.0994318	0.21459	-0.402495	-1.31504	34	20	RPA3,RFC2,POLD3,PCNA,POLD4,PRIM2,RPA2,FEN1,RFC4
1486	REACTOME_SYNTHESIS_OF_PIPS_AT_THE_LATE_ENDOSOME_MEMBRANE	0.138015	0.271479	-0.477302	-1.31648	56	11	FIG4,MTMR4,MTM1,PIK3R4,PIK3C3,MTMR2,PIK3C2A,MTMR9
1487	REACTOME_DEGRADATION_OF_GLI1_BY_THE_PROTEASOME	0.0524017	0.138392	-0.309399	-1.3178	11	56	PSMC4,PSMD10,CUL1,PSMD4,PSMC1,PSMB3,PSMD1,PSMB1,PSMD13,SKP1,PSMD7,PSMD6,PSMC3,PSMC2,PSMC6,PSMB4,PSMD14,PSMD5,UBC,PSMA2,PSMA7,UBB,PSMA1,RBX1,PSMA3,UBA52,PSMB7,PSMD8,PSMC5,PSMA4,PSMA5
1488	REACTOME_PIWI_INTERACTING_RNA_PIRNA_BIOGENESIS	0.0994152	0.21459	-0.386717	-1.31826	33	23	TDRD6,HENMT1,POLR2K,POLR2B,POLR2C,POLR2H,HSP90AA1,POLR2J,TDRD9,PIWIL4,POLR2L
1489	REACTOME_DEGRADATION_OF_AXIN	0.0617284	0.156114	-0.311296	-1.3297	14	53	PSMC4,PSMD10,PSMD4,PSMC1,PSMB3,PSMD1,PSMB1,PSMD13,PSMD7,PSMD6,PSMC3,PSMC2,PSMC6,PSMB4,PSMD14,PSMD5,UBC,PSMA2,PSMA7,UBB,PSMA1,PSMA3,UBA52,AXIN2,PSMB7,PSMD8,PSMC5,PSMA4,PSMA5
1490	REACTOME_WAX_AND_PLASMALOGEN_BIOSYNTHESIS	0.151786	0.286839	-0.642196	-1.33079	67	5	GNPAT,DHRS7B,AGPS
1491	REACTOME_THE_ROLE_OF_GTSE1_IN_G2_M_PROGRESSION_AFTER_G2_CHECKPOINT	0.0480349	0.130058	-0.294884	-1.33086	10	68	PSMC4,HSP90AB1,PSMD10,PSMD4,PLK1,PSMC1,PSMB3,PSMD1,PSMB1,PSMD13,FKBPL,PSMD7,CCNB2,PSMD6,PSMC3,TUBA4B,HSP90AA1,PSMC2,PSMC6,PSMB4,TUBA1A,PSMD14,PSMD5,UBC,PSMA2,PSMA7,UBB,PSMA1,PSMA3,UBA52,GTSE1,PSMB7,CDK1,CCNB1,PSMD8,PSMC5,PSMA4,PSMA5
1492	REACTOME_LEUKOTRIENE_RECEPTORS	0.125813	0.253725	-0.760615	-1.3309	57	3	CYSLTR1,LTB4R,LTB4R2
1493	REACTOME_ACYL_CHAIN_REMODELING_OF_CL	0.151786	0.286839	-0.643509	-1.33352	67	5	PLA2G6,HADHB,HADHA
1494	REACTOME_PROCESSIVE_SYNTHESIS_ON_THE_LAGGING_STRAND	0.122016	0.249135	-0.438095	-1.33556	45	15	RPA3,POLD3,PCNA,POLD4,PRIM2,RPA2,FEN1
1495	REACTOME_RNA_POLYMERASE_III_TRANSCRIPTION_INITIATION_FROM_TYPE_3_PROMOTER	0.0771605	0.179892	-0.374515	-1.33661	24	28	CRCP,SNAPC1,SNAPC4,POLR2K,POLR3G,POLR2H,TBP,POLR1D,POLR3B,POLR3A,POLR2L,ZNF143,POLR3F,SNAPC5
1496	REACTOME_EXPORT_OF_VIRAL_RIBONUCLEOPROTEINS_FROM_NUCLEUS	0.0766773	0.179599	-0.355258	-1.33968	23	33	AAAS,NUP93,NUP133,RAE1,NUP85,NDC1,NUP37,NUP155,TPR,NUP54,SEH1L,NUP35,NUP107,RAN,NUP43,NUP50,NUP98,NUP88
1497	REACTOME_MITOTIC_SPINDLE_CHECKPOINT	0.0178571	0.0637868	-0.274647	-1.34744	2	109	ANAPC5,DYNLL1,BUB3,NUP133,PLK1,ANAPC10,CENPM,NUP85,ANAPC7,CENPK,BIRC5,ANAPC11,SKA1,NUP37,ANAPC4,CENPN,CLASP2,SEH1L,CENPL,CKAP5,DSN1,KIF18A,MAD2L1,CDC26,CENPQ,UBE2E1,UBE2C,DYNC1I2,NUP107,UBE2D1,SKA2,KIF2C,CDCA8,NUP43,NUP98,ANAPC16,B9D2,BUB1,ANAPC1,ZWINT,ZW10,CENPF,CENPP,CENPI,SGO1,SGO2,NUDC,KNL1,ERCC6L,PPP2R1B,MAPRE1,CENPA,RPS27,ZWILCH,RANBP2,BUB1B,CENPE,CENPO,NUP160
1498	REACTOME_BIOSYNTHESIS_OF_MARESINS	0.148889	0.283807	-0.599903	-1.3503	66	6	EPHX2,CYP2C8
1499	REACTOME_NUCLEAR_IMPORT_OF_REV_PROTEIN	0.0803859	0.185799	-0.356092	-1.35763	24	34	AAAS,NUP93,NUP133,RAE1,NUP85,NDC1,NUP37,NUP155,TPR,NUP54,SEH1L,NUP35,NPM1,NUP107,RAN,NUP43,NUP50,NUP98,NUP88
1500	REACTOME_PHOSPHATE_BOND_HYDROLYSIS_BY_NUDT_PROTEINS	0.149038	0.283807	-0.585219	-1.35989	61	7	NUDT5,NUDT1,NUDT9,NUDT15
1501	REACTOME_POLB_DEPENDENT_LONG_PATCH_BASE_EXCISION_REPAIR	0.149038	0.283807	-0.586482	-1.36282	61	7	POLB,PARG,APEX1,PARP2,FEN1
1502	REACTOME_GLUTATHIONE_CONJUGATION	0.0702875	0.169376	-0.379503	-1.36355	21	29	GSTP1,MGST3,GSTZ1,GSTA3,GSTK1,CHAC2,GGT7,GSTM2,AKR1A1,MGST2,ESD,GSTM3
1503	REACTOME_METABOLISM_OF_RNA	0.125	0.252666	-0.233784	-1.37314	0	655	DDX23,RPP40,SNRPA1,APOBEC4,PPIL6,MNAT1,CNOT8,CNOT7,CCNH,NSUN6,AAAS,PSMC4,RTRAF,SYF2,NUP93,USP39,TRMT61B,DUS2,PSMD10,ZNF473,SMN1,DDX20,GLE1,GTF2F2,EXOSC5,SF3A3,BCAS2,BUD23,PSMD4,GEMIN6,WDR12,PUS3,FAM98B,NUP133,NOP56,RPL18,TRMT12,HSD17B10,LSM2,LSM10,CNOT10,UTP25,ADAT2,RPS15,RAE1,ZCRB1,XRN2,SNRNP40,RPL3L,RPL36AL,EIF4A3,CPSF3,RPL26L1,EXOSC8,PAPOLA,PSMC1,TRMT10C,TYW3,TRDMT1,DCP2,RPL28,CWC15,NUP85,PPIE…
1504	REACTOME_NUCLEOTIDE_EXCISION_REPAIR	0.0178571	0.0637868	-0.280016	-1.37378	2	109	CETN2,USP45,RPA3,MNAT1,CCNH,COPS8,INO80B,ERCC1,UBE2N,RUVBL1,RFC2,POLD3,NFRKB,DDB2,PPIE,COPS5,POLR2K,POLR2B,POLR2C,CDK7,CUL4A,ZNF830,POLR2H,ERCC4,PCNA,COPS7B,TFPT,POLD4,POLR2J,POLE3,SUMO2,TCEA1,UBC,POLE2,GPS1,UBB,COPS4,ISY1,RBX1,POLR2L,RPA2,ACTR8,PARP2,UBA52,UBE2V2,GTF2H2,INO80E,ERCC8
1505	REACTOME_PEROXISOMAL_PROTEIN_IMPORT	0.034188	0.101806	-0.320948	-1.37497	7	57	ACOT8,EPHX2,CAT,ECH1,PEX7,IDE,ACOT2,GNPAT,GSTK1,PEX12,PEX13,PEX2,EHHADH,ZFAND6,SLC27A2,HACL1,PECR,PEX1,SCP2,MPV17,UBC
1506	REACTOME_PHASE_II_CONJUGATION_OF_COMPOUNDS	0.0336538	0.100962	-0.301753	-1.37712	6	74	ABHD10,NAT1,GSTP1,MGST3,GSTZ1,ABHD14B,GSTA3,GSTK1,CHAC2,SLC26A2,MTRR,GGT7,MAT2B,GSTM2,AKR1A1,MAT2A,GLYATL2,PAPSS1,MGST2,ESD,TPST2,GSTM3,BPNT1,UGT2A1,TPMT,UGP2,TRMT112,SULT1A1,ACSM1,MAT1A,GSTM4,GSTO2,GSTO1,OPLAH,UGT1A7
1507	REACTOME_DNA_REPLICATION_PRE_INITIATION	0.0191083	0.0670273	-0.277232	-1.3774	2	117	RPA3,H2AJ,PSMC4,ORC3,PSMD10,PSMD4,PSMC1,PSMB3,PSMD1,PSMB1,H2AZ1,PSMD13,PSMD7,PSMD6,PSMC3,PSMC2,PSMC6,POLE3,MCM4,PSMB4,CDC6,PSMD14,H3C10,H4C9,MCM8,PSMD5,H3-3B,UBC,H3-3A,POLE2,PSMA2,PSMA7,UBB,PRIM2,PSMA1,H2BC11,ORC5,RPA2,ORC4,MCM3,PSMA3,UBA52,DBF4,GMNN,PSMB7,H3C8,H2BC5,PSMD8,PSMC5,PSMA4,MCM7,PSMA5,CDC7,H2AC6,SEM1,H2AZ2,PSMB2,RPS27A,E2F2,H2AC8
1508	REACTOME_DNA_STRAND_ELONGATION	0.05919	0.151598	-0.371407	-1.38253	18	32	RPA3,RFC2,POLD3,PCNA,POLD4,MCM4,GINS3,MCM8,PRIM2,RPA2,MCM3,FEN1,MCM7,RFC4,GINS4
1509	REACTOME_ERYTHROCYTES_TAKE_UP_CARBON_DIOXIDE_AND_RELEASE_OXYGEN	0.108374	0.227629	-0.574954	-1.38263	43	8	CYB5R4,CYB5R1,CYB5R2,CA1,HBB,CA2
1510	REACTOME_TRANSCRIPTION_COUPLED_NUCLEOTIDE_EXCISION_REPAIR_TC_NER	0.0191388	0.0670273	-0.299612	-1.38422	3	77	RPA3,MNAT1,CCNH,COPS8,ERCC1,RFC2,POLD3,PPIE,COPS5,POLR2K,POLR2B,POLR2C,CDK7,CUL4A,ZNF830,POLR2H,ERCC4,PCNA,COPS7B,POLD4,POLR2J,POLE3,TCEA1,UBC,POLE2,GPS1,UBB,COPS4,ISY1,RBX1,POLR2L,RPA2,UBA52,GTF2H2,ERCC8,RFC4,ERCC6
1511	REACTOME_FANCONI_ANEMIA_PATHWAY	0.0664557	0.164207	-0.356352	-1.39813	20	37	RPA3,ERCC1,USP1,POLN,ERCC4,FANCF,DCLRE1B,WDR48,UBC,UBB,FANCL,RPA2,FANCB,UBA52,UBE2T,FANCI,EME2,DCLRE1A,CENPX,RPS27A,FANCG,FAAP20,FANCM,ATRIP,FANCD2,FANCE
1512	REACTOME_METHIONINE_SALVAGE_PATHWAY	0.124444	0.252666	-0.624155	-1.40489	55	6	APIP,GOT1,MTAP
1513	REACTOME_SUMOYLATION_OF_SUMOYLATION_PROTEINS	0.0562914	0.145797	-0.368059	-1.40581	16	35	AAAS,NUP93,NUP133,RAE1,NUP85,NDC1,NUP37,NUP155,TPR,NUP54,SEH1L,SUMO2,NUP35,NUP107,NUP43,NUP50,NUP98,NUP88
1514	REACTOME_PHENYLALANINE_AND_TYROSINE_METABOLISM	0.110577	0.230452	-0.607362	-1.41134	45	7	FAH,GSTZ1,PCBD1
1515	REACTOME_TRANSPORT_OF_MATURE_TRANSCRIPT_TO_CYTOPLASM	0.0191388	0.0670273	-0.304553	-1.41379	3	81	AAAS,NUP93,GLE1,NUP133,RAE1,EIF4A3,CPSF3,NUP85,NXT1,MAGOH,NDC1,NUP37,ZC3H11A,NUP155,TPR,NCBP2,NUP54,UPF3B,SRRM1,SEH1L,SRSF6,SRSF11,THOC3,NXF1,NUP35,SRSF7,CDC40,NUP107,SRSF3,DDX39B,NUP43,THOC2,NUP50,NUP98,SLBP,NUP88,THOC1,SRSF5
1516	REACTOME_TRANSPORT_OF_MATURE_MRNAS_DERIVED_FROM_INTRONLESS_TRANSCRIPTS	0.0383142	0.110419	-0.353913	-1.41768	9	43	AAAS,NUP93,NUP133,RAE1,CPSF3,NUP85,NDC1,NUP37,NUP155,TPR,NCBP2,NUP54,SEH1L,NXF1,NUP35,NUP107,NUP43,NUP50,NUP98,SLBP,NUP88
1517	REACTOME_TRNA_MODIFICATION_IN_THE_NUCLEUS_AND_CYTOSOL	0.0383142	0.110419	-0.356469	-1.42792	9	43	NSUN6,DUS2,PUS3,TRMT12,ADAT2,TYW3,TRDMT1,TRMT10A,TRMT6,TRMT5,TRIT1,THG1L,ALKBH8,THADA,TRMT13,TPRKB,TRMT112,LAGE3,EPRS1
1518	REACTOME_SYNTHESIS_OF_BILE_ACIDS_AND_BILE_SALTS_VIA_7ALPHA_HYDROXYCHOLESTEROL	0.0769231	0.179599	-0.452609	-1.42813	27	18	AKR1C1,ACOT8,AKR1C2,HSD3B7,SLC27A2,AKR1C3,SCP2
1519	REACTOME_RECRUITMENT_OF_NUMA_TO_MITOTIC_CENTROSOMES	0.0097561	0.0420243	-0.304912	-1.42895	1	84	ODF2,CETN2,DYNLL1,HAUS1,CDK5RAP2,YWHAE,TUBGCP5,NME7,CEP70,CEP41,PLK1,CCP110,CEP78,HAUS8,PCM1,CNTRL,CEP290,AKAP9,CEP57,TUBA4B,HSP90AA1,NEK2,CKAP5,TUBA1A,HAUS4,PCNT,CEP63
1520	REACTOME_SYNTHESIS_SECRETION_AND_INACTIVATION_OF_GLUCOSE_DEPENDENT_INSULINOTROPIC_POLYPEPTIDE_GIP	0.0788177	0.182436	-0.597091	-1.43586	31	8	SPCS1,SEC11C,SPCS2,SEC11A,ISL1,DPP4
1521	REACTOME_HEME_BIOSYNTHESIS	0.0750605	0.176529	-0.521052	-1.43715	30	11	HMBS,COX15,UROD,PPOX
1522	REACTOME_TERMINAL_PATHWAY_OF_COMPLEMENT	0.0961969	0.211642	-0.745171	-1.4428	42	4	CLU,C5,C6,C9
1523	REACTOME_VIRAL_MESSENGER_RNA_SYNTHESIS	0.0387597	0.111107	-0.359842	-1.44821	9	44	AAAS,NUP93,GTF2F2,NUP133,RAE1,NUP85,POLR2K,POLR2B,POLR2C,POLR2H,NDC1,NUP37,NUP155,TPR,NUP54,POLR2J,SEH1L,NUP35,NUP107,POLR2L,NUP43,NUP50,NUP98,NUP88
1524	REACTOME_SEPARATION_OF_SISTER_CHROMATIDS	0.011236	0.0464131	-0.276454	-1.45627	0	178	ANAPC5,DYNLL1,PSMC4,PSMD10,PSMD4,BUB3,NUP133,PLK1,ANAPC10,CENPM,PSMC1,NUP85,PSMB3,ANAPC7,PSMD1,PSMB1,PSMD13,CENPK,CDCA5,PDS5B,PSMD7,BIRC5,ANAPC11,PSMD6,PSMC3,SKA1,NUP37,TUBA4B,ANAPC4,PSMC2,CENPN,PSMC6,SMC3,CLASP2,SEH1L,CENPL,CKAP5,PSMB4,DSN1,TUBA1A,PSMD14,PSMD5,KIF18A,UBC,MAD2L1,CDC26,CENPQ,UBE2E1,PSMA2,PSMA7,UBB,UBE2C,PSMA1,DYNC1I2,NUP107,UBE2D1,SKA2,KIF2C,CDCA8,PSMA3,UBA52,STAG2,NUP43,PSMB7,NUP…
1525	REACTOME_CDC6_ASSOCIATION_WITH_THE_ORC_ORIGIN_COMPLEX	0.0556901	0.145333	-0.532694	-1.46926	22	11	ORC3,CDC6,MCM8,ORC5,ORC4
1526	REACTOME_PCNA_DEPENDENT_LONG_PATCH_BASE_EXCISION_REPAIR	0.0560224	0.145333	-0.444062	-1.47193	19	21	RPA3,RFC2,POLB,POLD3,APEX1,PCNA,POLD4,POLE3,POLE2,RPA2,FEN1,RFC4
1527	REACTOME_METHYLATION	0.0556901	0.145333	-0.533767	-1.47222	22	11	MTRR,MAT2B,MAT2A,TPMT,TRMT112,MAT1A,GSTO1,N6AMT1
1528	REACTOME_ABERRANT_REGULATION_OF_MITOTIC_EXIT_IN_CANCER_DUE_TO_RB1_DEFECTS	0.0738636	0.174223	-0.450947	-1.47335	25	20	ANAPC5,ANAPC10,ANAPC7,ANAPC11,ANAPC4,CDC26,RB1,UBE2E1,UBE2C,UBE2D1,SKP2,ANAPC16,ANAPC1
1529	REACTOME_TRNA_MODIFICATION_IN_THE_MITOCHONDRION	0.0503597	0.134038	-0.581839	-1.48626	20	9	TRMT61B,HSD17B10,TRMT10C,TRIT1
1530	REACTOME_REGULATION_OF_PLK1_ACTIVITY_AT_G2_M_TRANSITION	0.0097561	0.0420243	-0.318125	-1.49087	1	84	ODF2,CETN2,DYNLL1,HAUS1,CDK5RAP2,CUL1,YWHAE,CEP70,CEP41,PLK1,CCP110,CEP78,HAUS8,PCM1,PPP1CB,SKP1,CNTRL,CEP290,AKAP9,CCNB2,CEP57,HSP90AA1,NEK2,CKAP5,TUBA1A,HAUS4,PCNT,CEP63,UBC,CEP152,UBB,DYNC1I2,CEP250,TUBB,UBA52,AURKA,CDK1,CCNB1
1531	REACTOME_DUAL_INCISION_IN_TC_NER	0.012766	0.0497965	-0.338065	-1.49389	2	64	RPA3,MNAT1,CCNH,ERCC1,RFC2,POLD3,PPIE,POLR2K,POLR2B,POLR2C,CDK7,CUL4A,ZNF830,POLR2H,ERCC4,PCNA,POLD4,POLR2J,POLE3,TCEA1,UBC,POLE2,UBB,ISY1,RBX1,POLR2L,RPA2,UBA52,GTF2H2,ERCC8,RFC4,ERCC6
1532	REACTOME_NEGATIVE_REGULATION_OF_NOTCH4_SIGNALING	0.0166667	0.0618664	-0.346869	-1.49418	3	54	PSMC4,PSMD10,CUL1,PSMD4,PSMC1,PSMB3,PSMD1,PSMB1,PSMD13,SKP1,PSMD7,PSMD6,PSMC3,PSMC2,PSMC6,PSMB4,PSMD14,PSMD5,UBC,PSMA2,PSMA7,UBB,PSMA1,RBX1,PSMA3,UBA52,PSMB7,PSMD8,PSMC5,PSMA4,PSMA5
1533	REACTOME_GLOBAL_GENOME_NUCLEOTIDE_EXCISION_REPAIR_GG_NER	0.00952381	0.0415796	-0.320314	-1.4964	1	83	CETN2,USP45,RPA3,MNAT1,CCNH,COPS8,INO80B,ERCC1,UBE2N,RUVBL1,RFC2,POLD3,NFRKB,DDB2,COPS5,CDK7,CUL4A,ERCC4,PCNA,COPS7B,TFPT,POLD4,POLE3,SUMO2,UBC,POLE2,GPS1,UBB,COPS4,RBX1,RPA2,ACTR8,PARP2,UBA52,UBE2V2,GTF2H2,INO80E
1534	REACTOME_NONSENSE_MEDIATED_DECAY_NMD	0.0125	0.049527	-0.303288	-1.49707	1	114	RPL18,RPS15,RPL3L,RPL36AL,EIF4A3,RPL26L1,RPL28,RPL8,RPS28,MAGOH,RPL13,RPL19,NCBP2,UPF3B,RPS16,RPS17,RPL3,RPL13A,RPL7A,RPL14,RPS19,RPS6,RPL22L1,RPS4X,RPS3A,RPL4,RPL12,RPL15,RPS26,RPLP1,RPL41,RPL27A,RPS14,RPL10A,RPS5,RPS24,UBA52,RPS23,RPL5,RPL10,RPS3,RPL23,RPS20,RPS7,RPL36,RPS11,RPL7,RPL6,RPS25,RPS8,RPL17,PNRC2,RPL32,RPLP0,RPL38,RPL37A,RPS13,RPS21,MAGOHB,FAU,RPS27A,RPL29,RPSA,RPL35,RPL21,RPS12,RPL2…
1535	REACTOME_RESOLUTION_OF_ABASIC_SITES_AP_SITES	0.028481	0.090404	-0.382596	-1.5011	8	37	RPA3,MBD4,RFC2,POLB,POLD3,PARG,TDG,APEX1,PCNA,POLD4,POLE3,MUTYH,NEIL1,POLE2,RPA2,PARP2,FEN1
1536	REACTOME_TRAFFICKING_OF_MYRISTOYLATED_PROTEINS_TO_THE_CILIUM	0.064877	0.162053	-0.776037	-1.50256	28	4	ARL3,NPHP3
1537	REACTOME_ACTIVATION_OF_THE_PRE_REPLICATIVE_COMPLEX	0.0280374	0.0896195	-0.404747	-1.50663	8	32	RPA3,ORC3,POLE3,MCM4,CDC6,MCM8,POLE2,PRIM2,ORC5,RPA2,ORC4,MCM3,DBF4,GMNN,MCM7,CDC7
1538	REACTOME_TRNA_PROCESSING_IN_THE_MITOCHONDRION	0.0673077	0.164791	-0.648474	-1.50688	27	7	HSD17B10,TRMT10C,TRNT1,MT-RNR2,MT-RNR1,ELAC2
1539	REACTOME_RECRUITMENT_OF_MITOTIC_CENTROSOME_PROTEINS_AND_COMPLEXES	0.00938967	0.0413947	-0.325302	-1.51372	1	78	ODF2,CETN2,DYNLL1,HAUS1,CDK5RAP2,YWHAE,TUBGCP5,NME7,CEP70,CEP41,PLK1,CCP110,CEP78,HAUS8,PCM1,CNTRL,CEP290,AKAP9,CEP57,HSP90AA1,NEK2,CKAP5,TUBA1A,HAUS4,PCNT,CEP63
1540	REACTOME_ACTIVATION_OF_ATR_IN_RESPONSE_TO_REPLICATION_STRESS	0.028481	0.090404	-0.386058	-1.51468	8	37	RPA3,RAD1,ORC3,RFC2,MCM4,CDC6,MCM8,ORC5,RPA2,ORC4,MCM3,DBF4,MCM7,RFC4,RAD9B,CDC7,RAD9A,RAD17,CHEK1
1541	REACTOME_HDR_THROUGH_HOMOLOGOUS_RECOMBINATION_HRR	0.00881057	0.0396476	-0.34264	-1.51573	1	65	RAD51C,RPA3,RAD1,RFC2,POLD3,SPIDR,RAD51,RAD51B,RHNO1,PCNA,POLD4,POLE3,BLM,WRN,TOPBP1,UBC,POLE2,UBB,MRE11,RPA2,UBA52,POLH,GEN1,TOP3A,EME2,RFC4,BRCA1,RAD9B,RAD9A,RAD17,RPS27A,PALB2,CHEK1,RAD50,POLE4,RFC1,ATM,RFC5
1542	REACTOME_DISORDERS_OF_TRANSMEMBRANE_TRANSPORTERS	0.00740741	0.0353057	-0.296653	-1.51612	0	141	SLC4A4,DERL3,AAAS,PSMC4,NUP93,PSMD10,SLC35A3,CFTR,PSMD4,NUP133,RAE1,DERL2,PSMC1,NUP85,SLC26A2,PSMB3,PSMD1,PSMB1,PSMD13,CP,PSMD7,LMBRD1,SLC33A1,NDC1,SLC7A9,SLC24A1,PSMD6,PSMC3,ABCC2,NUP37,NUP155,TPR,PSMC2,ERLIN1,SLC20A2,PSMC6,SLC40A1,NUP54,SLC6A14,SEH1L,DERL1,PSMB4,SLC34A3,PSMD14,PSMD5,UBC,NUP35,RNF185,PSMA2,PSMA7,UBB,PSMA1,SLC39A4,NUP107,RNF5,PSMA3,UBA52,NUP43,SLC1A1,NUP50,PSMB7,NUP98,SLC17A5,NUP…
1543	REACTOME_THE_PHOTOTRANSDUCTION_CASCADE	0.0504202	0.134038	-0.457769	-1.51736	17	21	GUCY2F,NMT2,CALM1,METAP2,CAMKMT,METAP1,SLC24A1
1544	REACTOME_DUAL_INCISION_IN_GG_NER	0.025	0.0825307	-0.383549	-1.52588	6	40	RPA3,ERCC1,RFC2,POLD3,DDB2,CUL4A,ERCC4,PCNA,POLD4,POLE3,UBC,POLE2,UBB,RBX1,RPA2,PARP2,UBA52,GTF2H2,RFC4,GTF2H5,RPS27A,POLE4,RFC1,GTF2H1,RFC5,CUL4B
1545	REACTOME_S_PHASE	0.00833333	0.0383571	-0.29649	-1.5328	0	160	ANAPC5,RPA3,MNAT1,CCNH,PSMC4,ORC3,PSMD10,CUL1,RFC2,PSMD4,POLD3,ANAPC10,PSMC1,PSMB3,ANAPC7,PSMD1,PSMB1,E2F5,PSMD13,CDCA5,SKP1,RBBP4,CDK7,PDS5B,PSMD7,PCNA,ANAPC11,PSMD6,PSMC3,ANAPC4,PSMC2,POLD4,PSMC6,SMC3,POLE3,MCM4,PSMB4,CDC6,CDK4,PSMD14,GINS3,MCM8,PSMD5,UBC,CDC26,RB1,POLE2,UBE2E1,PSMA2,PSMA7,UBB,PRIM2,UBE2C,PSMA1,UBE2D1,RBX1,CCNA2,ORC5,RPA2,ORC4,MCM3,PSMA3,UBA52,STAG2,FEN1,SKP2,PSMB7,ANAPC16,PSMD…
1546	REACTOME_ABC_TRANSPORTERS_IN_LIPID_HOMEOSTASIS	0.0557029	0.145333	-0.514971	-1.535	20	14	ABCA5,ABCD3,ABCA9,PEX3,PEX19,ABCD2
1547	REACTOME_FORMATION_OF_INCISION_COMPLEX_IN_GG_NER	0.0182482	0.0647529	-0.38319	-1.53502	4	42	CETN2,USP45,RPA3,MNAT1,CCNH,ERCC1,UBE2N,DDB2,CDK7,CUL4A,ERCC4,SUMO2,UBC,UBB,RBX1,RPA2,PARP2,UBA52,UBE2V2,GTF2H2
1548	REACTOME_METABOLISM_OF_AMINO_ACIDS_AND_DERIVATIVES	0.0169492	0.062304	-0.274688	-1.54559	0	318	OCA2,FAH,AFMID,PSMC4,PDHX,PSMD10,FOLH1,GSTZ1,SUOX,AIMP1,PSMD4,MCCC1,RPL18,HSD17B10,RARS1,APIP,KYNU,RPS15,AZIN1,ALDH7A1,LIPT1,RPL3L,RPL36AL,RPL26L1,PSMC1,QARS1,DLD,RPL28,AASS,PSMB3,NDUFAB1,PSMD1,TDO2,PSMB1,NAALAD2,DLAT,DARS1,RPL8,PSMD13,SRR,RPS28,SLC36A4,PDHB,PCBD1,PSMD7,SEPSECS,LIPT2,CHDH,LARS1,PSMD6,PSMC3,RPL13,GLUL,ALDH9A1,RPL19,PSMC2,PDHA1,TXN2,PSMC6,AIMP2,HDC,GATM,HYKK,MTRR,RPS16,RPS17,ACAT1,…
1549	REACTOME_INFLUENZA_INFECTION	0.00813008	0.0379639	-0.301131	-1.55584	0	155	AAAS,NUP93,KPNA2,GTF2F2,NUP133,RPL18,RPS15,RAE1,RPL3L,RPL36AL,RPL26L1,RPL28,NUP85,RPL8,POLR2K,POLR2B,RPS28,POLR2C,CANX,GRSF1,POLR2H,NDC1,RPL13,NUP37,NUP155,HSP90AA1,TPR,RPL19,NUP54,POLR2J,SEH1L,RPS16,RPS17,KPNA5,RPL3,NUP35,RPL13A,RPL7A,RPL14,RPS19,RPS6,RPL22L1,RPS4X,RPS3A,RPL4,RPL12,RPL15,NUP107,POLR2L,RPS26,RPLP1,RPL41,RAN,RPL27A,RPS14,RPL10A,RPS5,RPS24,UBA52,RPS23,RPL5,NUP43,RPL10,RPS3,RPL23,RP…
1550	REACTOME_CHAPERONE_MEDIATED_AUTOPHAGY	0.0392157	0.112111	-0.471899	-1.5642	13	21	IFT88,HSP90AB1,CFTR,HSPA8,LAMP2,PARK7,RNASE1,HSP90AA1,PCNT,UBC,UBB,UBA52,EEF1A1
1551	REACTOME_REGULATION_OF_GLUCOKINASE_BY_GLUCOKINASE_REGULATORY_PROTEIN	0.0125786	0.049527	-0.432512	-1.56888	3	30	AAAS,NUP93,NUP133,RAE1,NUP85,NDC1,NUP37,NUP155,TPR,NUP54,SEH1L,NUP35,NUP107,NUP43,NUP50,NUP98,NUP88
1552	REACTOME_RECOGNITION_OF_DNA_DAMAGE_BY_PCNA_CONTAINING_REPLICATION_COMPLEX	0.00943396	0.0414118	-0.433792	-1.57352	2	30	RPA3,RFC2,POLD3,CUL4A,USP1,PCNA,POLD4,WDR48,POLE3,UBC,POLE2,UBB,RBX1,RPA2,UBA52
1553	REACTOME_AURKA_ACTIVATION_BY_TPX2	0.00896861	0.0401345	-0.347881	-1.57724	1	69	ODF2,CETN2,DYNLL1,HAUS1,CDK5RAP2,YWHAE,CEP70,CEP41,PLK1,CCP110,CEP78,HAUS8,PCM1,CNTRL,CEP290,AKAP9,TPX2,CEP57,HSP90AA1,NEK2,CKAP5,TUBA1A,HAUS4,PCNT,CEP63
1554	REACTOME_E2F_ENABLED_INHIBITION_OF_PRE_REPLICATION_COMPLEX_FORMATION	0.028777	0.0907235	-0.621058	-1.58645	11	9	ORC3,MCM8,ORC5,ORC4,CDK1,CCNB1
1555	REACTOME_TRANSPORT_OF_THE_SLBP_DEPENDANT_MATURE_MRNA	0.0128205	0.0498885	-0.410941	-1.59537	3	36	AAAS,NUP93,NUP133,RAE1,NUP85,NDC1,NUP37,NUP155,TPR,NCBP2,NUP54,SEH1L,NXF1,NUP35,NUP107,NUP43,NUP50,NUP98,SLBP,NUP88
1556	REACTOME_TYROSINE_CATABOLISM	0.010846	0.0455023	-0.915026	-1.60108	4	3	FAH,GSTZ1
1557	REACTOME_ARYL_HYDROCARBON_RECEPTOR_SIGNALLING	0.0466667	0.127424	-0.71153	-1.60156	20	6	HSP90AB1,PTGES3,AIP
1558	REACTOME_RESOLUTION_OF_AP_SITES_VIA_THE_MULTIPLE_NUCLEOTIDE_PATCH_REPLACEMENT_PATHWAY	0.0149701	0.0560855	-0.46559	-1.60892	4	24	RPA3,RFC2,POLB,POLD3,PARG,APEX1,PCNA,POLD4,POLE3,POLE2,RPA2,PARP2,FEN1
1559	REACTOME_SYNTHESIS_OF_WYBUTOSINE_AT_G37_OF_TRNA_PHE	0.0444444	0.124008	-0.715014	-1.6094	19	6	TRMT12,TYW3,TRMT5
1560	REACTOME_CHOLINE_CATABOLISM	0.0267857	0.0866502	-0.777596	-1.61138	11	5	ALDH7A1,CHDH,BHMT,DMGDH
1561	REACTOME_METALLOPROTEASE_DUBS	0.011976	0.048471	-0.460317	-1.6114	3	25	BABAM2,BRCC3,ABRAXAS2,PSMD14,UBC,UBB,STAMBPL1,UBA52,STAM,H2AC11,UIMC1,BRCA1,STAMBP,H2AC6,RPS27A,H2AC8,H2AC20,H2AC13
1562	REACTOME_TRANSLESION_SYNTHESIS_BY_POLK	0.0351351	0.104153	-0.524465	-1.62517	12	17	RPA3,RFC2,PCNA,UBC,UBB,RPA2,UBA52,RFC4,RPS27A,RFC1,RFC5,MAD2L2,RFC3,POLK,REV1
1563	REACTOME_FORMATION_OF_ATP_BY_CHEMIOSMOTIC_COUPLING	0.0302198	0.0938036	-0.516044	-1.62828	10	18	ATP5F1B,ATP5F1E,ATP5MG,ATP5F1C,ATP5F1A,ATP5PB,ATP5MC2,MT-ATP6,DMAC2L,ATP5MC1,ATP5PF,ATP5MC3
1564	REACTOME_DNA_REPLICATION	0.00833333	0.0383571	-0.314965	-1.62831	0	160	ANAPC5,RPA3,H2AJ,PSMC4,ORC3,PSMD10,CUL1,RFC2,PSMD4,POLD3,ANAPC10,PSMC1,PSMB3,ANAPC7,PSMD1,PSMB1,H2AZ1,PSMD13,SKP1,PSMD7,PCNA,ANAPC11,PSMD6,PSMC3,ANAPC4,PSMC2,POLD4,PSMC6,POLE3,MCM4,PSMB4,CDC6,PSMD14,H3C10,GINS3,H4C9,MCM8,PSMD5,H3-3B,UBC,CDC26,H3-3A,POLE2,UBE2E1,PSMA2,PSMA7,UBB,PRIM2,UBE2C,PSMA1,UBE2D1,RBX1,CCNA2,H2BC11,ORC5,RPA2,ORC4,MCM3,PSMA3,UBA52,FEN1,DBF4,SKP2,GMNN,PSMB7,H3C8,ANAPC16,H2BC5,P…
1565	REACTOME_DISEASES_OF_MISMATCH_REPAIR_MMR	0.0245536	0.0813905	-0.786261	-1.62933	10	5	MSH3,MSH2,MLH1
1566	REACTOME_PROTEIN_LOCALIZATION	0.00806452	0.0378774	-0.31622	-1.62958	0	152	ACOT8,EPHX2,SAMM50,GET1,CAT,CHCHD3,ECH1,PEX7,GDAP1,IDE,ACOT2,SEC61B,PMPCB,ATP5F1B,COA4,GNPAT,SLC25A17,ABCD3,PXMP4,CMC2,GSTK1,PEX12,PEX3,PEX13,HSPD1,PEX19,PEX2,EHHADH,TOMM7,GRPEL1,CHCHD2,ALDH3A2,ABCD2,CHCHD5,ZFAND6,PITRM1,GFER,TOMM22,SLC27A2,IDH3G,SEC61G,CHCHD7,HACL1,MTX1,PECR,HSPA9,COA6,PEX1,TIMM17A,SCP2,CYB5A,MPV17,DNAJC19,TIMM50,TOMM20,FIS1,UBC,ATP5F1A
1567	REACTOME_ABC_TRANSPORTER_DISORDERS	0.00896861	0.0401345	-0.360076	-1.63253	1	69	DERL3,PSMC4,PSMD10,CFTR,PSMD4,DERL2,PSMC1,PSMB3,PSMD1,PSMB1,PSMD13,PSMD7,LMBRD1,PSMD6,PSMC3,ABCC2,PSMC2,ERLIN1,PSMC6,DERL1,PSMB4,PSMD14,PSMD5,UBC,RNF185,PSMA2,PSMA7,UBB,PSMA1,RNF5,PSMA3,UBA52,PSMB7,PSMD8,PSMC5,PSMA4,PSMA5
1568	REACTOME_CDT1_ASSOCIATION_WITH_THE_CDC6_ORC_ORIGIN_COMPLEX	0.0042735	0.0278729	-0.382118	-1.63703	0	57	PSMC4,ORC3,PSMD10,PSMD4,PSMC1,PSMB3,PSMD1,PSMB1,PSMD13,PSMD7,PSMD6,PSMC3,PSMC2,PSMC6,PSMB4,CDC6,PSMD14,MCM8,PSMD5,UBC,PSMA2,PSMA7,UBB,PSMA1,ORC5,ORC4,PSMA3,UBA52,GMNN,PSMB7,PSMD8,PSMC5,PSMA4,PSMA5
1569	REACTOME_MISMATCH_REPAIR	0.0132626	0.0514845	-0.551006	-1.67977	4	15	RPA3,MSH3,POLD3,MSH2,MLH1,PCNA,POLD4
1570	REACTOME_ABC_FAMILY_PROTEINS_MEDIATED_TRANSPORT	0.00510204	0.0295055	-0.356942	-1.69366	0	90	DERL3,PSMC4,PSMD10,ABCA5,CFTR,PSMD4,ABCD3,ABCA9,DERL2,PSMC1,PEX3,PSMB3,PSMD1,PSMB1,PEX19,PSMD13,ABCD2,PSMD7,PSMD6,PSMC3,ABCC2,PSMC2,ERLIN1,PSMC6,DERL1,PSMB4,PSMD14,PSMD5,UBC,RNF185,PSMA2,PSMA7,ABCC4,UBB,PSMA1,RNF5,PSMA3,UBA52,EIF2S1,PSMB7,ABCB7,PSMD8,PSMC5,PSMA4,ABCA6,PSMA5,ABCA4
1571	REACTOME_NUCLEAR_PORE_COMPLEX_NPC_DISASSEMBLY	0.00641026	0.0326801	-0.437482	-1.69841	1	36	AAAS,NUP93,NUP133,RAE1,NUP85,NDC1,CCNB2,NUP37,NUP155,TPR,NUP54,SEH1L,NUP35,NUP107,NUP43,NUP50,NUP98,CDK1,CCNB1,NUP88
1572	REACTOME_INHIBITION_OF_THE_PROTEOLYTIC_ACTIVITY_OF_APC_C_REQUIRED_FOR_THE_ONSET_OF_ANAPHASE_BY_MITOTIC_SPINDLE_CHECKPOINT_COMPONENTS	0.0168067	0.0622428	-0.517538	-1.71548	5	21	ANAPC5,BUB3,ANAPC10,ANAPC7,ANAPC11,ANAPC4,MAD2L1,CDC26,UBE2E1,UBE2C,UBE2D1,ANAPC16,ANAPC1
1573	REACTOME_DEFECTIVE_CFTR_CAUSES_CYSTIC_FIBROSIS	0.00421941	0.0277448	-0.396969	-1.71932	0	59	DERL3,PSMC4,PSMD10,CFTR,PSMD4,DERL2,PSMC1,PSMB3,PSMD1,PSMB1,PSMD13,PSMD7,PSMD6,PSMC3,PSMC2,ERLIN1,PSMC6,DERL1,PSMB4,PSMD14,PSMD5,UBC,RNF185,PSMA2,PSMA7,UBB,PSMA1,RNF5,PSMA3,UBA52,PSMB7,PSMD8,PSMC5,PSMA4,PSMA5
1574	REACTOME_METALLOTHIONEINS_BIND_METALS	0.0177778	0.0637862	-0.771103	-1.73565	7	6	MT1G,MT3
1575	REACTOME_APC_C_CDH1_MEDIATED_DEGRADATION_OF_CDC20_AND_OTHER_APC_C_CDH1_TARGETED_PROTEINS_IN_LATE_MITOSIS_EARLY_G1	0.00476191	0.0291804	-0.385453	-1.74174	0	72	ANAPC5,PSMC4,PSMD10,PSMD4,PLK1,ANAPC10,PSMC1,PSMB3,ANAPC7,PSMD1,PSMB1,PSMD13,PSMD7,ANAPC11,PSMD6,PSMC3,ANAPC4,PSMC2,PSMC6,PSMB4,PSMD14,PSMD5,UBC,CDC26,RB1,UBE2E1,PSMA2,PSMA7,UBB,UBE2C,PSMA1,UBE2D1,PSMA3,UBA52,AURKA,SKP2,PSMB7,ANAPC16,PSMD8,PSMC5,PSMA4,ANAPC1,PSMA5
1576	REACTOME_RESPONSE_OF_EIF2AK4_GCN2_TO_AMINO_ACID_DEFICIENCY	0.00584795	0.0315085	-0.365975	-1.7488	0	100	RPL18,RPS15,RPL3L,RPL36AL,RPL26L1,RPL28,RPL8,RPS28,RPL13,RPL19,RPS16,RPS17,ATF2,RPL3,RPL13A,RPL7A,RPL14,RPS19,RPS6,RPL22L1,RPS4X,RPS3A,RPL4,RPL12,RPL15,RPS26,RPLP1,RPL41,RPL27A,RPS14,RPL10A,RPS5,RPS24,UBA52,RPS23,EIF2S1,RPL5,RPL10,RPS3,RPL23,RPS20,RPS7,RPL36,RPS11,RPL7,RPL6,RPS25,RPS8,RPL17,EIF2AK4,RPL32,RPLP0,RPL38,RPL37A,RPS13,RPS21,FAU,RPS27A,RPL29,CEBPG,RPSA,RPL35,RPL21,RPS12,RPL24,RPS27,RPS1…
1577	REACTOME_TRNA_AMINOACYLATION	0.00364964	0.0250194	-0.439761	-1.76164	0	42	WARS2,EARS2,HARS2,RARS2,AIMP1,RARS1,MARS2,QARS1,IARS2,DARS1,CARS1,PPA2,DARS2,FARS2,NARS1,LARS1,VARS2,AIMP2,FARSB
1578	REACTOME_TRNA_PROCESSING_IN_THE_NUCLEUS	0.0042735	0.0278729	-0.41627	-1.78968	0	58	RPP40,AAAS,RTRAF,NUP93,FAM98B,NUP133,RAE1,NUP85,TRNT1,C2orf49,POP4,RPP30,NDC1,NUP37,NUP155,TPR,DDX1,NUP54,SEH1L,TSEN2,NUP35,POP5,NUP107,RAN,POP1,CLP1,NUP43,RPP38,NUP50,NUP98,NUP88
1579	REACTOME_PHOSPHORYLATION_OF_THE_APC_C	0.0113636	0.0467011	-0.54841	-1.79178	3	20	ANAPC5,PLK1,ANAPC10,ANAPC7,ANAPC11,ANAPC4,CDC26,UBE2E1,UBE2C,UBE2D1,CDK1,CCNB1,ANAPC16,ANAPC1
1580	REACTOME_ORC1_REMOVAL_FROM_CHROMATIN	0.00448431	0.0285542	-0.397514	-1.80227	0	69	PSMC4,ORC3,PSMD10,CUL1,PSMD4,PSMC1,PSMB3,PSMD1,PSMB1,PSMD13,SKP1,PSMD7,PSMD6,PSMC3,PSMC2,PSMC6,MCM4,PSMB4,CDC6,PSMD14,MCM8,PSMD5,UBC,PSMA2,PSMA7,UBB,PSMA1,RBX1,CCNA2,ORC5,ORC4,MCM3,PSMA3,UBA52,SKP2,PSMB7,PSMD8,PSMC5,PSMA4,MCM7,PSMA5
1581	REACTOME_APC_C_CDC20_MEDIATED_DEGRADATION_OF_CYCLIN_B	0.00598802	0.0317326	-0.529136	-1.82852	1	24	ANAPC5,ANAPC10,ANAPC7,ANAPC11,ANAPC4,UBC,CDC26,UBE2E1,UBB,UBE2C,UBE2D1,UBA52,CDK1,CCNB1,ANAPC16,ANAPC1
1582	REACTOME_REGULATION_OF_EXPRESSION_OF_SLITS_AND_ROBOS	0.00862069	0.0392314	-0.355256	-1.84928	0	163	PSMC4,PSMD10,PSMD4,RPL18,RPS15,RPL3L,RPL36AL,EIF4A3,RPL26L1,PSMC1,RPL28,PSMB3,PSMD1,PSMB1,RPL8,PSMD13,ELOB,RPS28,PSMD7,MAGOH,COL4A5,PSMD6,PSMC3,RPL13,RPL19,PSMC2,PSMC6,NCBP2,UPF3B,RPS16,RPS17,PSMB4,PSMD14,PSMD5,RPL3,UBC,RPL13A,RPL7A,RPL14,PSMA2,PSMA7,RPS19,UBB,RPS6,PSMA1,RPL22L1,ELOC,RPS4X,RPS3A,RPL4,RPL12,RPL15,RBX1,RPS26,RPLP1,RPL41,RPL27A,RPS14,RPL10A,RPS5,PSMA3,RPS24,UBA52,RPS23,RPL5,RPL10,RP…
1583	REACTOME_MITOCHONDRIAL_PROTEIN_IMPORT	0.0041841	0.0276254	-0.421071	-1.84943	0	61	SAMM50,CHCHD3,PMPCB,ATP5F1B,COA4,CMC2,HSPD1,TOMM7,GRPEL1,CHCHD2,CHCHD5,PITRM1,GFER,TOMM22,IDH3G,CHCHD7,MTX1,HSPA9,COA6,TIMM17A,DNAJC19,TIMM50,TOMM20,ATP5F1A,CHCHD4,TIMM21,COX17,VDAC1
1584	REACTOME_CARGO_TRAFFICKING_TO_THE_PERICILIARY_MEMBRANE	0.003861	0.0261263	-0.45952	-1.8698	0	45	BBS12,ARL3,LZTFL1,CNGA4,BBS4,TTC8,RAB11A,ARL6,NPHP3,TCP1,BBIP1,EXOC6,CCT8,CCT5,CCT2,ARF4,CCT3,BBS1,EXOC4,BBS7,EXOC5,MKKS,BBS10,EXOC1
1585	REACTOME_SWITCHING_OF_ORIGINS_TO_A_POST_REPLICATIVE_STATE	0.00497512	0.0295055	-0.395712	-1.87712	0	89	ANAPC5,PSMC4,ORC3,PSMD10,CUL1,PSMD4,ANAPC10,PSMC1,PSMB3,ANAPC7,PSMD1,PSMB1,PSMD13,SKP1,PSMD7,ANAPC11,PSMD6,PSMC3,ANAPC4,PSMC2,PSMC6,MCM4,PSMB4,CDC6,PSMD14,MCM8,PSMD5,UBC,CDC26,UBE2E1,PSMA2,PSMA7,UBB,UBE2C,PSMA1,UBE2D1,RBX1,CCNA2,ORC5,ORC4,MCM3,PSMA3,UBA52,SKP2,PSMB7,ANAPC16,PSMD8,PSMC5,PSMA4,ANAPC1,MCM7,PSMA5
1586	REACTOME_ALPHA_OXIDATION_OF_PHYTANATE	0.00222222	0.0228025	-0.836642	-1.88317	0	6	SLC25A17,ALDH3A2,SLC27A2,HACL1,PECR
1587	REACTOME_APC_CDC20_MEDIATED_DEGRADATION_OF_NEK2A	0.00611621	0.0321827	-0.531915	-1.8857	1	26	ANAPC5,BUB3,ANAPC10,ANAPC7,ANAPC11,ANAPC4,NEK2,UBC,MAD2L1,CDC26,UBE2E1,UBB,UBE2C,UBE2D1,UBA52,ANAPC16,ANAPC1
1588	REACTOME_SNRNP_ASSEMBLY	0.00416667	0.0276254	-0.439361	-1.8926	0	54	AAAS,NUP93,SMN1,DDX20,GEMIN6,NUP133,RAE1,NUP85,SNRPD1,SNRPF,TGS1,NDC1,NUP37,NUP155,SNRPD2,TPR,NCBP2,NUP54,SEH1L,GEMIN5,SNRPD3,NUP35,GEMIN8,GEMIN2,NUP107,NUP43,CLNS1A,NUP50,NUP98,NUP88,SNRPE,SNUPN
1589	REACTOME_SYNTHESIS_OF_BILE_ACIDS_AND_BILE_SALTS_VIA_24_HYDROXYCHOLESTEROL	0.00242131	0.0230683	-0.689273	-1.90113	0	11	AKR1C1,CYP39A1,AKR1C2,HSD3B7,SLC27A2,AKR1C3,CYP46A1
1590	REACTOME_APC_C_MEDIATED_DEGRADATION_OF_CELL_CYCLE_PROTEINS	0.00502513	0.0295055	-0.40572	-1.90292	0	86	ANAPC5,PSMC4,PSMD10,CUL1,PSMD4,BUB3,PLK1,ANAPC10,PSMC1,PSMB3,ANAPC7,PSMD1,PSMB1,PSMD13,SKP1,PSMD7,ANAPC11,PSMD6,PSMC3,ANAPC4,PSMC2,PSMC6,NEK2,PSMB4,PSMD14,PSMD5,UBC,MAD2L1,CDC26,RB1,UBE2E1,PSMA2,PSMA7,UBB,UBE2C,PSMA1,UBE2D1,CCNA2,PSMA3,UBA52,AURKA,SKP2,PSMB7,CDK1,CCNB1,ANAPC16,PSMD8,PSMC5,PSMA4,ANAPC1
1591	REACTOME_CLASS_I_PEROXISOMAL_MEMBRANE_PROTEIN_IMPORT	0.00557103	0.0310145	-0.591117	-1.90856	1	19	GDAP1,SLC25A17,ABCD3,PXMP4,PEX12,PEX3,PEX13,PEX19,PEX2,ALDH3A2,ABCD2
1592	REACTOME_SYNTHESIS_OF_DNA	0.00625	0.0322021	-0.3855	-1.92708	0	118	ANAPC5,RPA3,PSMC4,ORC3,PSMD10,CUL1,RFC2,PSMD4,POLD3,ANAPC10,PSMC1,PSMB3,ANAPC7,PSMD1,PSMB1,PSMD13,SKP1,PSMD7,PCNA,ANAPC11,PSMD6,PSMC3,ANAPC4,PSMC2,POLD4,PSMC6,POLE3,MCM4,PSMB4,CDC6,PSMD14,GINS3,MCM8,PSMD5,UBC,CDC26,POLE2,UBE2E1,PSMA2,PSMA7,UBB,PRIM2,UBE2C,PSMA1,UBE2D1,RBX1,CCNA2,ORC5,RPA2,ORC4,MCM3,PSMA3,UBA52,FEN1,SKP2,PSMB7,ANAPC16,PSMD8,PSMC5,PSMA4,ANAPC1,MCM7,RFC4,PSMA5
1593	REACTOME_TRNA_PROCESSING	0.00581395	0.0315085	-0.390529	-1.92975	0	110	RPP40,NSUN6,AAAS,RTRAF,NUP93,TRMT61B,DUS2,PUS3,FAM98B,NUP133,TRMT12,HSD17B10,ADAT2,RAE1,TRMT10C,TYW3,TRDMT1,NUP85,TRNT1,C2orf49,POP4,RPP30,NDC1,TRMT10A,NUP37,NUP155,TPR,TRMT6,DDX1,NUP54,SEH1L,TSEN2,TRMT5,TRIT1,NUP35,THG1L,ALKBH8,THADA,POP5,NUP107,RAN,TRMT13,POP1,CLP1,NUP43,RPP38,MT-RNR2,NUP50,NUP98,NUP88,TPRKB,TRMT112,LAGE3,EPRS1,TSEN15,TRMU,NUP153,TRMT9B
1594	REACTOME_EUKARYOTIC_TRANSLATION_INITIATION	0.00625	0.0322021	-0.396815	-1.98365	0	118	RPL18,RPS15,RPL3L,RPL36AL,RPL26L1,RPL28,RPL8,EIF3K,RPS28,EIF2B3,RPL13,RPL19,RPS16,RPS17,RPL3,EIF3C,RPL13A,RPL7A,RPL14,EIF3M,EIF5B,EIF3I,EIF2B2,RPS19,RPS6,RPL22L1,RPS4X,RPS3A,RPL4,RPL12,RPL15,EIF5,EIF3L,RPS26,RPLP1,RPL41,EIF3E,RPL27A,RPS14,RPL10A,RPS5,RPS24,UBA52,RPS23,EIF2S1,RPL5,RPL10,EIF4A1,RPS3,RPL23,RPS20,RPS7,RPL36,RPS11,RPL7,RPL6,RPS25,RPS8,RPL17,RPL32,RPLP0,RPL38,RPL37A,EIF3H,RPS13,RPS21,F…
1595	REACTOME_MITOCHONDRIAL_TRNA_AMINOACYLATION	0.00560224	0.0310145	-0.600445	-1.99029	1	21	WARS2,EARS2,HARS2,RARS2,MARS2,QARS1,IARS2,PPA2,DARS2,FARS2,VARS2
1596	REACTOME_RRNA_PROCESSING	0.011236	0.0464131	-0.375983	-2.01842	0	200	RPP40,EXOSC5,BUD23,WDR12,NOP56,RPL18,HSD17B10,UTP25,RPS15,XRN2,RPL3L,RPL36AL,RPL26L1,EXOSC8,TRMT10C,RPL28,SNU13,RPL8,RPS28,EXOSC1,MPHOSPH10,PWP2,NOL11,NHP2,UTP14A,RPP30,EMG1,LTV1,RPL13,RPL19,PES1,RPS16,RPS17,UTP11,NCL,GNL3,NOB1,RPL3,TEX10,RRP36,RPL13A,RPL7A,RPL14,WDR43,DCAF13,RPS19,RCL1,RPS6,NOP10,FTSJ3,EBNA1BP2,UTP20,RPL22L1,RPS4X,RPS3A,RPL4,EXOSC10,RPL12,WDR75,RPL15,MTREX,KRR1,RBM28,MRM3,RPS26,…
1597	REACTOME_ANCHORING_OF_THE_BASAL_BODY_TO_THE_PLASMA_MEMBRANE	0.00558659	0.0310145	-0.427	-2.03004	0	94	ODF2,NPHP1,CETN2,CC2D2A,TCTN3,DYNLL1,HAUS1,RPGRIP1L,CDK5RAP2,RAB11A,YWHAE,CEP70,CEP41,PLK1,MKS1,CCP110,CEP78,TMEM67,HAUS8,PCM1,C2CD3,CNTRL,CEP162,CEP290,AKAP9,IQCB1,FBF1,TMEM216,AHI1,SEPTIN2,CEP97,CEP57,HSP90AA1,TCTN1,NEK2,B9D1,CKAP5,TUBA1A,HAUS4,PCNT,CEP63,CEP83,CEP152
1598	REACTOME_ORGANELLE_BIOGENESIS_AND_MAINTENANCE	0.0151515	0.0566336	-0.371594	-2.03128	0	273	ODF2,KIFAP3,IFT43,DYNC2LI1,NPHP1,IFT46,CETN2,IFT88,HSPB11,CC2D2A,BBS12,ARL3,SAMM50,TCTN3,DYNLL1,HAUS1,RPGRIP1L,LZTFL1,IFT74,CDK5RAP2,IFT27,CHCHD3,WDR19,CNGA4,IFT52,DYNLRB2,BBS4,IFT80,TTC8,CLUAP1,RAB11A,DYNC2H1,ARL6,YWHAE,APOO,ATP5F1B,MICOS13,ATP5F1E,CEP70,CEP41,CHCHD6,PLK1,MKS1,DYNLRB1,CCP110,CEP78,MICOS10,TMEM67,IFT22,PRKAA2,TTC26,APOOL,NPHP3,CALM1,HAUS8,TRIP11,TCP1,IFT122,IFT57,BBIP1,ATP5MG,PCM…
1599	REACTOME_THE_CITRIC_ACID_TCA_CYCLE_AND_RESPIRATORY_ELECTRON_TRANSPORT	0.010101	0.042936	-0.394169	-2.06021	0	173	NDUFB10,NDUFB7,NDUFAF3,NDUFA5,NDUFV3,NDUFA3,PDHX,MPC2,NDUFB11,GSTZ1,ATP5F1B,ATP5F1E,NDUFS3,MDH2,MT-CO1,SUCLG1,NDUFB4,SLC25A27,MT-CO3,DLD,NDUFAF7,COX7C,NDUFAB1,ATP5MG,SLC25A14,COX6B1,SDHB,TIMMDC1,MT-CYB,DLAT,NDUFA6,NDUFA4,PDHB,COA1,MT-ND4,COQ10A,NDUFB1,COX7A2L,UQCR11,COX4I1,COX11,FH,SUCLA2,UQCRB,IDH3G,ATP5F1C,TRAP1,UQCR10,COX7B,PDHA1,MT-ND2,TMEM126B,LDHA,NDUFS5,ADHFE1,MT-CO2,ETFDH,NDUFB5,COX14,NDU…
1600	REACTOME_BBSOME_MEDIATED_CARGO_TARGETING_TO_CILIUM	0.00280112	0.0230683	-0.625892	-2.07464	0	21	BBS12,LZTFL1,BBS4,TTC8,ARL6,TCP1,BBIP1,CCT8,CCT5,CCT2,CCT3,BBS1,BBS7,MKKS,BBS10
1601	REACTOME_COMPLEX_I_BIOGENESIS	0.00436681	0.0279571	-0.512697	-2.18369	0	56	NDUFB10,NDUFB7,NDUFAF3,NDUFA5,NDUFV3,NDUFA3,NDUFB11,NDUFS3,NDUFB4,NDUFAF7,NDUFAB1,TIMMDC1,NDUFA6,COA1,MT-ND4,NDUFB1,MT-ND2,TMEM126B,NDUFS5,NDUFB5,NDUFAF1,NDUFC1,NDUFA8,NDUFB9,NDUFB6,MT-ND5,MT-ND6,MT-ND3,ACAD9,NDUFS2,NDUFS1,NDUFS4,MT-ND1,NDUFA13,NDUFAF5,NDUFAF4
1602	REACTOME_CRISTAE_FORMATION	0.00315457	0.0230683	-0.600018	-2.20345	0	31	SAMM50,CHCHD3,APOO,ATP5F1B,MICOS13,ATP5F1E,CHCHD6,MICOS10,APOOL,ATP5MG,IMMT,ATP5F1C,MTX1,HSPA9,ATP5F1A,ATP5PB,TMEM11
1603	REACTOME_TRANSLATION	0.0169492	0.062304	-0.417706	-2.30426	0	289	MRPL55,ERAL1,SRPRB,MRPL9,MRPL50,MTIF3,WARS2,EARS2,HARS2,MRPS15,MRPS9,SPCS1,MRPL42,RARS2,GADD45GIP1,GFM2,MRRF,RPN2,SEC11C,SRP14,SEC61B,AIMP1,SSR4,MRPL38,RPL18,MRPL52,MRPS36,MRPS18A,RARS1,MRPL20,RPS15,MARS2,MRPL23,RPL3L,MRPL47,RPL36AL,RPL26L1,MRPS33,QARS1,MRPS5,MRPL21,MRPS18B,RPL28,MRPL37,IARS2,DARS1,MRPL57,RPL8,MRPS14,EIF3K,CARS1,MRPS23,RPS28,SSR1,SRP9,MRPL32,MRPL22,MRPL36,MRPL58,PPA2,DARS2,FARS2,…
1604	REACTOME_RESPIRATORY_ELECTRON_TRANSPORT	0.00584795	0.0315085	-0.481316	-2.30553	0	102	NDUFB10,NDUFB7,NDUFAF3,NDUFA5,NDUFV3,NDUFA3,NDUFB11,NDUFS3,MT-CO1,NDUFB4,MT-CO3,NDUFAF7,COX7C,NDUFAB1,COX6B1,SDHB,TIMMDC1,MT-CYB,NDUFA6,NDUFA4,COA1,MT-ND4,COQ10A,NDUFB1,COX7A2L,UQCR11,COX4I1,COX11,UQCRB,TRAP1,UQCR10,COX7B,MT-ND2,TMEM126B,NDUFS5,MT-CO2,ETFDH,NDUFB5,COX14,NDUFAF1,SCO1,NDUFC1,NDUFA8,NDUFB9,COX5B,NDUFB6,UQCRC2,MT-ND5,MT-ND6,MT-ND3,ACAD9,NDUFS2,CYCS,COX20,NDUFS1,NDUFS4,MT-ND1,NDUFA13,…
1605	REACTOME_EUKARYOTIC_TRANSLATION_ELONGATION	0.005291	0.0302263	-0.486947	-2.30732	0	91	RPL18,RPS15,RPL3L,RPL36AL,RPL26L1,RPL28,RPL8,RPS28,RPL13,RPL19,RPS16,RPS17,RPL3,RPL13A,RPL7A,RPL14,RPS19,RPS6,RPL22L1,RPS4X,RPS3A,RPL4,RPL12,RPL15,RPS26,RPLP1,RPL41,RPL27A,RPS14,RPL10A,RPS5,RPS24,UBA52,RPS23,RPL5,EEF1A1,RPL10,RPS3,RPL23,RPS20,RPS7,RPL36,RPS11,RPL7,RPL6,RPS25,RPS8,RPL17,RPL32,RPLP0,RPL38,RPL37A,EEF1B2,RPS13,RPS21,FAU,RPS27A,RPL29,RPSA,RPL35,RPL21,RPS12,RPL24,RPS27,RPS10,RPL36A,RPL…
1606	REACTOME_RESPIRATORY_ELECTRON_TRANSPORT_ATP_SYNTHESIS_BY_CHEMIOSMOTIC_COUPLING_AND_HEAT_PRODUCTION_BY_UNCOUPLING_PROTEINS	0.00684931	0.033327	-0.470452	-2.35133	0	124	NDUFB10,NDUFB7,NDUFAF3,NDUFA5,NDUFV3,NDUFA3,NDUFB11,ATP5F1B,ATP5F1E,NDUFS3,MT-CO1,NDUFB4,SLC25A27,MT-CO3,NDUFAF7,COX7C,NDUFAB1,ATP5MG,SLC25A14,COX6B1,SDHB,TIMMDC1,MT-CYB,NDUFA6,NDUFA4,COA1,MT-ND4,COQ10A,NDUFB1,COX7A2L,UQCR11,COX4I1,COX11,UQCRB,ATP5F1C,TRAP1,UQCR10,COX7B,MT-ND2,TMEM126B,NDUFS5,MT-CO2,ETFDH,NDUFB5,COX14,NDUFAF1,ATP5F1A,SCO1,NDUFC1,ATP5PB,NDUFA8,NDUFB9,COX5B,NDUFB6,UQCRC2,MT-ND5,MT-…
1607	REACTOME_INTRAFLAGELLAR_TRANSPORT	0.00387597	0.0261263	-0.607611	-2.44536	0	44	KIFAP3,IFT43,DYNC2LI1,IFT46,IFT88,HSPB11,DYNLL1,IFT74,IFT27,WDR19,IFT52,DYNLRB2,IFT80,CLUAP1,DYNC2H1,DYNLRB1,IFT22,TTC26,TRIP11,IFT122,IFT57,TTC21B,WDR35
1608	REACTOME_CILIUM_ASSEMBLY	0.0114943	0.0469981	-0.472226	-2.46538	0	180	ODF2,KIFAP3,IFT43,DYNC2LI1,NPHP1,IFT46,CETN2,IFT88,HSPB11,CC2D2A,BBS12,ARL3,TCTN3,DYNLL1,HAUS1,RPGRIP1L,LZTFL1,IFT74,CDK5RAP2,IFT27,WDR19,CNGA4,IFT52,DYNLRB2,BBS4,IFT80,TTC8,CLUAP1,RAB11A,DYNC2H1,ARL6,YWHAE,CEP70,CEP41,PLK1,MKS1,DYNLRB1,CCP110,CEP78,TMEM67,IFT22,TTC26,NPHP3,HAUS8,TRIP11,TCP1,IFT122,IFT57,BBIP1,PCM1,TTC21B,EXOC6,C2CD3,CCT8,CNTRL,WDR35,CCT5,CEP162,CEP290,AKAP9,IQCB1,FBF1,TMEM216,CC…
1609	REACTOME_SELENOAMINO_ACID_METABOLISM	0.00617284	0.0321827	-0.503099	-2.48803	0	112	AIMP1,RPL18,RARS1,RPS15,RPL3L,RPL36AL,RPL26L1,QARS1,RPL28,DARS1,RPL8,RPS28,SEPSECS,LARS1,RPL13,RPL19,AIMP2,RPS16,RPS17,RPL3,RPL13A,RPL7A,RPL14,PAPSS1,SEPHS2,RPS19,RPS6,RPL22L1,RPS4X,RPS3A,SECISBP2,RPL4,RPL12,RPL15,RPS26,RPLP1,RPL41,RPL27A,RPS14,RPL10A,RPS5,RPS24,UBA52,RPS23,RPL5,RPL10,RPS3,RPL23,RPS20,RPS7,RPL36,RPS11,RPL7,PSTK,RPL6,RPS25,RPS8,RPL17,RPL32,RPLP0,RPL38,RPL37A,EPRS1,RPS13,RPS21,MAT1…
1610	REACTOME_MITOCHONDRIAL_TRANSLATION	0.00531915	0.0302797	-0.571756	-2.72626	0	93	MRPL55,ERAL1,MRPL9,MRPL50,MTIF3,MRPS15,MRPS9,MRPL42,GADD45GIP1,GFM2,MRRF,MRPL38,MRPL52,MRPS36,MRPS18A,MRPL20,MRPL23,MRPL47,MRPS33,MRPS5,MRPL21,MRPS18B,MRPL37,MRPL57,MRPS14,MRPS23,MRPL32,MRPL22,MRPL36,MRPL58,MRPL33,OXA1L,MRPL13,MRPS31,MRPL35,CHCHD1,MRPS11,MRPL19,MRPL15,MRPS12,MRPS2,MRPS21,MRPL39,MRPL3,MRPS35,MRPL48,MRPL54,MRPS22,MRPS16,MRPL45,MRPL18,PTCD3,MRPL27,MRPL43,MRPL12,MRPS26
1611	REACTOME_SRP_DEPENDENT_COTRANSLATIONAL_PROTEIN_TARGETING_TO_MEMBRANE	0.00584795	0.0315085	-0.551462	-2.74076	0	111	SRPRB,SPCS1,RPN2,SEC11C,SRP14,SEC61B,SSR4,RPL18,RPS15,RPL3L,RPL36AL,RPL26L1,RPL28,RPL8,RPS28,SSR1,SRP9,RPL13,SEC61G,RPL19,RPS16,SRP54,RPS17,RPL3,RPL13A,RPL7A,RPL14,SEC61A1,RPS19,SRP72,RPS6,RPL22L1,RPS4X,RPS3A,RPL4,RPL12,RPL15,RPS26,RPLP1,RPL41,RPL27A,RPS14,RPL10A,RPS5,RPS24,UBA52,RPS23,RPL5,RPL10,RPS3,RPL23,RPS20,RPS7,RPL36,RPS11,RPL7,SSR2,RPL6,RPS25,RPS8,RPL17,DDOST,RPL32,RPLP0,RPL38,RPL37A,RPS1…

## Sheet: PC
	pathway	pval	padj	ES	NES	nMoreExtreme	size	leadingEdge
1	REACTOME_CELL_CELL_COMMUNICATION	0.00230947	0.0141606	0.600226	2.59936	0	98	NECTIN4,CLDN4,CLDN7,ACTG1,NCK2,WASL,PARD3,JUP,F11R,VASP,CRB3,NECTIN2,FLNA,SPTBN1,SRC,ACTN4,PARD6B,NECTIN1,LAMC2,FBLIM1,COL17A1,ITGB1,CDH11,ACTB,CTNND1,GRB2,CD2AP,LAMB3,CLDN5,CLDN3,ACTN1,ITGA6,ITGB4,CDH3,SIRPA,LAMA3,PLEC,PTK2B,TESK1,CD151,CLDN12,PRKCI,PIK3
2	REACTOME_NEGATIVE_REGULATION_OF_MAPK_PATHWAY	0.00217391	0.0141606	0.696956	2.58877	0	42	DUSP1,DUSP5,UBC,DUSP7,PPP2R5A,MARK3,DUSP2,MAPK3,PPP2CB,MAP2K2,PPP2R1A,ARAF,DUSP8,DUSP10,PAQR3,PPP2CA,RAF1,MAP2K1,DUSP16,PTPN3,KRAS,HRAS,PPP2R5B,PPP2R5D,DUSP6,PPP5C
3	REACTOME_CELL_JUNCTION_ORGANIZATION	0.00223214	0.0141606	0.634521	2.58234	0	73	NECTIN4,CLDN4,CLDN7,ACTG1,PARD3,JUP,F11R,VASP,CRB3,NECTIN2,FLNA,PARD6B,NECTIN1,LAMC2,FBLIM1,COL17A1,ITGB1,CDH11,ACTB,CTNND1,LAMB3,CLDN5,CLDN3,ACTN1,ITGA6,ITGB4,CDH3,LAMA3,PLEC,TESK1,CD151,CLDN12,PRKCI,CTNNB1,PXN,CDH1,PVR,FERMT2,KRT5,SDK1,PATJ,CTNNA1,PARVA
4	REACTOME_SIGNALING_BY_RECEPTOR_TYROSINE_KINASES	0.00241546	0.0141606	0.481123	2.52953	0	431	GRB7,UBC,EREG,DUSP7,HBEGF,JUNB,HSPB1,JUND,PTPN12,GALNT3,PRDM1,TRIB1,WASF2,ARF6,SHC1,ACTG1,IRS2,EPS15L1,NCK2,NAB2,NCF1,FOSL1,LYN,SPINT1,AHCYL1,JUP,ID1,MAPK3,NCKAP1,VEGFA,ATP6V0B,PTBP1,GAB2,WWP1,CRKL,LAMC1,ITGA3,PPP2CB,HIF1A,ITPR3,MAP2K2,DIAPH1,FOS,SPRED2,S
5	REACTOME_ATTENUATION_PHASE	0.00214133	0.0141606	0.765486	2.52428	0	25	HSPA1A,HSPA1B,HSPA6,DNAJB1,DEDD2,HSPB1,FKBP4,HSPA2,HSPH1,HSF1,SERPINH1,TNFRSF21,DNAJB6
6	REACTOME_SIGNALING_BY_VEGF	0.00229885	0.0141606	0.579699	2.49497	0	96	HSPB1,WASF2,ACTG1,NCK2,NCF1,AHCYL1,JUP,NCKAP1,VEGFA,ITPR3,SRC,MAPKAPK2,MAPK13,BCAR1,DOCK1,RAC1,AKT2,SPHK1,ABI1,PRKACA,ACTB,NRP2,CTNND1,RASA1,PRKCD,TRIB3,RHOA,PRKCA,BAIAP2,AKT1,CYFIP1,MAPKAP1,VAV1,PAK2,CRK,VEGFB,PTK2B,KRAS,HRAS,SHB,MAPK14,PIK3CB,VAV2,PDPK1
7	REACTOME_PARASITE_INFECTION	0.00225734	0.0141606	0.647203	2.4895	0	49	WASF2,ACTG1,WASL,LYN,MAPK3,NCKAP1,SRC,MYO1C,DOCK1,RAC1,WIPF2,ABI1,ACTB,GRB2,MYO10,YES1,MYO9B,BAIAP2,CYFIP1,VAV1,CRK,MYH9,VAV2,MYO5A,ABL1
8	REACTOME_HSF1_DEPENDENT_TRANSACTIVATION	0.00219298	0.0141606	0.701012	2.47963	0	33	HSPA1A,HSPA1B,HSPA6,DNAJB1,DEDD2,HSPB1,FKBP4,HSPA2,HSPH1,CRYAB,HSF1,SERPINH1,TNFRSF21,DNAJB6
9	REACTOME_HEMOSTASIS	0.00242718	0.0141606	0.466144	2.44948	0	432	GRB7,PLAUR,RCOR1,CEACAM1,PPP2R5A,MAFF,PLAU,MAFG,SDC4,SHC1,GNAS,ATP1B1,TGFB1,SDC1,LYN,WEE1,SLC16A3,GNB2,SLC7A11,MAPK3,F11R,IRF1,HSPA5,THBD,CAPZB,VEGFA,ATP2A2,ECM1,ITGA3,PPP2CB,DOCK6,SLC7A8,RHOB,CEACAM5,GNB1,FLNA,ITPR3,GNA13,GNA15,RAC2,CD99,KIF16B,ATP2B4,HA
10	REACTOME_PLATELET_ACTIVATION_SIGNALING_AND_AGGREGATION	0.00248756	0.0141606	0.517889	2.44015	0	186	SHC1,TGFB1,LYN,GNB2,MAPK3,HSPA5,VEGFA,ECM1,RHOB,GNB1,FLNA,ITPR3,GNA13,GNA15,RAC2,HABP4,SRC,FAM3C,GNAI2,TOR4A,MANF,RHOG,WDR1,ABHD12,EGF,ACTN4,GAS6,PTPN1,APLP2,BCAR1,RAC1,APP,DGKA,SERPINE1,PLCG2,TMSB4X,PRKCD,STXBP2,DGKE,CD63,GRB2,ENDOD1,RHOA,DGKZ,CAP1,CSK,T
11	REACTOME_SIGNALING_BY_NTRKS	0.00236407	0.0141606	0.550483	2.43649	0	116	DUSP7,JUNB,JUND,TRIB1,SHC1,IRS2,NAB2,FOSL1,ID1,MAPK3,CRKL,PPP2CB,MAP2K2,FOS,SRC,MAPKAPK2,RPS6KA1,TIAM1,MAPK13,PPP2R1A,MAP2K5,RAC1,RIT1,FOSB,CLTA,PPP2CA,MEF2D,AP2A1,RAPGEF1,AP2A2,AP2S1,CLTC,ELK1,NELFB,GRB2,DNM2,RHOA,MAP2K1,CRK,GAB1,CHD4,KRAS,RALB,HRAS,STAT
12	REACTOME_RAB_REGULATION_OF_TRAFFICKING	0.00234742	0.0141606	0.549676	2.43353	0	114	ARF6,RAB21,TBC1D7,RAB14,RAB32,RAB6A,RAB8B,RAB5B,RAB3A,GDI1,GABARAPL2,SBF2,OPTN,TBC1D10A,AKT2,RAB11B,TRAPPC9,RAB10,RAB5A,MAP1LC3B,DENND2B,TRAPPC1,DENND1C,RAB5C,RAB7A,DENND2C,RAB12,AKT1,RAB1A,HPS4,TBC1D14,DENND1A,DENND5A,RAB13,MON1B,RAB27A,DENND3,TRAPPC10,R
13	REACTOME_INTEGRATION_OF_ENERGY_METABOLISM	0.0022779	0.0141606	0.585441	2.43045	0	79	TKT,STX1A,GNAS,SLC2A1,FASN,ADIPOR2,GNB2,AHCYL1,PPP2CB,GNB1,ITPR3,GNA15,STXBP1,GNAI2,PPP2R1A,ACACA,PRKACA,PPP2CA,ACSL3,ACLY,ADIPOR1,PRKCA,GNAI1,MLX,ADCY7,PLCB3,STK11,GNG5,GNG4,PRKAG2,AGPAT1,MARCKS,ADCY9,GNA11,ACSL4,PPP2R5D,RAP1A,TALDO1
14	REACTOME_CELL_SURFACE_INTERACTIONS_AT_THE_VASCULAR_WALL	0.00228833	0.0141606	0.56275	2.41948	0	94	GRB7,CEACAM1,SDC4,SHC1,ATP1B1,TGFB1,SDC1,LYN,SLC16A3,SLC7A11,F11R,THBD,ITGA3,SLC7A8,CEACAM5,CD99,SRC,GAS6,ITGA5,MMP1,ITGB1,TNFRSF10B,BSG,CD74,GRB2,EPCAM,TNFRSF10A,YES1,SLC3A2,GLG1,ITGA6,SIRPA,PROCR,SDC2,CD44,KRAS,HRAS,PSG8,PIK3CB
15	REACTOME_ANTIGEN_PRESENTATION_FOLDING_ASSEMBLY_AND_PEPTIDE_LOADING_OF_CLASS_I_MHC	0.00215054	0.0141606	0.736803	2.40712	0	24	HLA-A,SEC24A,HSPA5,HLA-E,SEC24D,SEC13,SEC23A,SEC24C,TAP1,TAPBP,HLA-C,HLA-B,PDIA3,HLA-F
16	REACTOME_LEISHMANIA_INFECTION	0.00242718	0.0141606	0.524026	2.40339	0	146	ADM,JUN,WASF2,GNAS,ACTG1,DVL1,WASL,LYN,GNB2,AHCYL1,HMOX1,MAPK3,NCKAP1,RELA,GNB1,ITPR3,DVL2,SRC,GNAI2,MYO1C,HTR7,DOCK1,RAC1,APP,WIPF2,ABI1,PRKACA,DVL3,ACTB,ADAM17,PLCG2,IL1B,RHBDF2,GRB2,MYO10,YES1,MYO9B,BAIAP2,GNAI1,NFKB2,CYFIP1,ADCY7,IL1A,VAV1,GNG5,CRK,AD
17	REACTOME_INTERLEUKIN_4_AND_INTERLEUKIN_13_SIGNALING	0.002331	0.0141606	0.572852	2.39673	0	82	PIM1,JUNB,FOXO3,PTGS2,IL6R,TGFB1,FSCN1,HMOX1,VEGFA,CEBPD,HIF1A,SOCS3,BCL2L1,FOS,MCL1,CDKN1A,MMP1,ITGB1,TWIST1,IL1B,AKT1,IL1A,POU2F1,BCL6,HSP90B1,JAK1,SOCS1,MAOA,STAT3,IL13RA1,MUC1,TIMP1,CXCL8,ICAM1,LIF,CCL22,IL18,IL4R,ALOX15,FOXO1,BCL2,MYC
18	REACTOME_HSF1_ACTIVATION	0.00209644	0.0141606	0.701138	2.38978	0	28	HSPA1A,HSPA1B,HSPA6,DNAJB1,DEDD2,HSPB1,FKBP4,HSPH1,HSF1,SERPINH1,TNFRSF21,DNAJB6
19	REACTOME_CELL_CELL_JUNCTION_ORGANIZATION	0.00223214	0.0141606	0.619883	2.37847	0	48	NECTIN4,CLDN4,CLDN7,ACTG1,PARD3,JUP,F11R,CRB3,NECTIN2,PARD6B,NECTIN1,CDH11,ACTB,CTNND1,CLDN5,CLDN3,CDH3,CLDN12,PRKCI,CTNNB1,CDH1,PVR,SDK1,PATJ,CTNNA1
20	REACTOME_FORMATION_OF_THE_CORNIFIED_ENVELOPE	0.00226757	0.0141606	0.595197	2.37079	0	65	PRSS8,TGM5,JUP,KRT8,PPL,ST14,KRT17,CAPN1,KRT23,KRT10,TGM1,EVPL,SPRR1B,KRT19,CAPNS1,KRT16,PKP3,DSG2,PKP4,DSP,PKP2,SPRR1A,FURIN,SPRR3,KRT18,KRT7,PKP1,KRT15,KRT6A,KRT5,KLK13,KRT80,PERP,KRT6B,PCSK6,KRT24
21	REACTOME_NEUTROPHIL_DEGRANULATION	0.00230415	0.0141606	0.455444	2.36469	0	385	HSPA1A,HSPA1B,HSPA6,BRI3,PLAUR,CEACAM1,FTL,PLAU,TMBIM1,RAP2B,KCMF1,ADAM8,HLA-A,AGPAT2,RAB14,EEF2,FTH1,JUP,GM2A,CTSD,ARL8A,PTAFR,VAT1,RAB6A,CNN2,HEBP2,DGAT1,HEXB,S100P,DIAPH1,RAB5B,CST3,RAB3A,RHOG,CYB5R3,GUSB,FUCA1,CAPN1,SLC44A2,GPI,NEU1,RAC1,TCIRG1,NBEAL2
22	REACTOME_IRE1ALPHA_ACTIVATES_CHAPERONES	0.00225225	0.0141606	0.614423	2.35398	0	47	SHC1,DNAJB9,EDEM1,HSPA5,ERN1,HDGF,LMNA,SERP1,ATP6V0D1,MYDGF,CTDSP2,PDIA6,YIF1A,ACADVL,KLHDC3,GFPT1,ADD1,PDIA5,SRPRA,WIPI1,TPP1,KDELR3,TLN1,PPP2R5B,GSK3A,ARFGAP1,SYVN1,HYOU1,DNAJB11,EXTL3,CUL7,PREB,WFS1,FKBP14,ZBTB17
23	REACTOME_EPH_EPHRIN_SIGNALING	0.00228311	0.0141606	0.559453	2.35024	0	83	EPHA2,ACTG1,NCK2,WASL,EFNB1,LYN,SRC,TIAM1,EPHB3,APH1A,EPHB4,RAC1,CLTA,MYH14,ACTB,RASA1,AP2A1,AP2A2,AP2S1,LIMK1,CLTC,SDCBP,RHOA,YES1,EFNA3,PAK2,SDC2,CFL1,NGEF,HRAS,MYH9,CLTB,VAV2,MYH10,GIT1,ARHGEF7,ITSN1,MYL12A,AP2B1,MMP2,EPHB2,PTK2,PAK1,EFNA5,NCSTN,MMP9,A
24	REACTOME_CLATHRIN_MEDIATED_ENDOCYTOSIS	0.00241546	0.0141606	0.518116	2.34284	0	129	UBC,TRIP10,EREG,HBEGF,LDLR,ARF6,ACTG1,EPS15L1,WASL,GRK2,LDLRAP1,UBQLN1,DVL2,RAB5B,PICALM,EGF,SH3GL1,GAK,AAK1,CLTA,ACTB,RAB5A,AP2A1,STON2,AREG,SH3KBP1,AP2A2,AP2S1,RAB5C,CLTC,OCRL,SNX9,GRB2,DNM2,ITSN2,TGFA,SCARB2,EPN1,COPS7A,FNBP1,FCHO1,CBL,UBQLN2,IGF2R,SYN
25	REACTOME_RESPONSE_OF_EIF2AK4_GCN2_TO_AMINO_ACID_DEFICIENCY	0.00233645	0.0141606	0.537085	2.33045	0	100	CEBPB,DDIT3,ATF3,RPS2,GCN1,RPL18A,RPS9,RPLP2,TRIB3,EIF2S3,RPL14,RPS15A,ATF4,RPL13,RPL3,RPS8,RPL18,RPL29,RPL24,RPL34,RPL22L1,RPL17,RPL28,RPL12,RPL8,RPS18,RPS12,EIF2S2,RPL32,RPS19,RPLP1,RPL4,RPS13,RPL36,RPS20,RPL9,RPL39L,RPLP0,RPL10,RPS24,RPL27A,RPS28,RPS3,
26	REACTOME_KERATINIZATION	0.00229358	0.0141606	0.578914	2.31875	0	67	PRSS8,TGM5,JUP,KRT8,PPL,ST14,KRT17,CAPN1,KRT23,KRT10,TGM1,EVPL,SPRR1B,KRT19,CAPNS1,KRT16,PKP3,DSG2,PKP4,DSP,PKP2,SPRR1A,FURIN,SPRR3,KRT18,KRT7,PKP1,KRT15,KRT6A,KRT5,KLK13,KRT80,PERP,KRT6B,PCSK6,KRT24
27	REACTOME_SIGNALING_BY_PTK6	0.00229358	0.0141606	0.605826	2.31855	0	50	UBC,EREG,HBEGF,CDKN1B,HIF1A,SOCS3,EGF,PTK6,PTPN1,BCAR1,DOCK1,RAC1,RASA1,RHOA,KHDRBS3,AKT1,KHDRBS1,CRK,ARAP1,ERBB2,CBL,KRAS,HRAS,NRG2,STAT3,ARHGAP35,PXN,STAP2,EPAS1,CCND1,ERBB3
28	REACTOME_FCGAMMA_RECEPTOR_FCGR_DEPENDENT_PHAGOCYTOSIS	0.00223214	0.0141606	0.568482	2.31358	0	73	WASF2,ACTG1,WASL,LYN,AHCYL1,MAPK3,NCKAP1,ITPR3,SRC,MYO1C,DOCK1,RAC1,WIPF2,ABI1,ACTB,PLCG2,PRKCD,LIMK1,GRB2,MYO10,PLD3,YES1,MYO9B,BAIAP2,CYFIP1,VAV1,CRK,PLD2,CFL1,NF2,MYH9,PIK3CB,VAV2,MYO5A,ABL1
29	REACTOME_VEGFR2_MEDIATED_CELL_PROLIFERATION	0.00210526	0.0141606	0.751378	2.30895	0	18	AHCYL1,VEGFA,ITPR3,SRC,SPHK1,RASA1,PRKCD,PRKCA,KRAS,HRAS,PDPK1,PRKCZ
30	REACTOME_BASIGIN_INTERACTIONS	0.00215054	0.0141606	0.725112	2.29337	0	20	ATP1B1,SLC16A3,SLC7A11,ITGA3,SLC7A8,MMP1,ITGB1,BSG,SLC3A2,ITGA6
31	REACTOME_RHO_GTPASES_ACTIVATE_WASPS_AND_WAVES	0.00219298	0.0141606	0.647708	2.29108	0	33	WASF2,ACTG1,WASL,MAPK3,NCKAP1,RAC1,WIPF2,ABI1,ACTB,GRB2,BAIAP2,CYFIP1,ABL1,WASF3,PTK2,MAPK1,ARPC5,ARPC2
32	REACTOME_RAF_INDEPENDENT_MAPK1_3_ACTIVATION	0.0021645	0.0141606	0.700074	2.28078	0	23	DUSP1,DUSP5,DUSP7,IL6R,DUSP2,MAPK3,MAP2K2,PEA15,DUSP8,DUSP10,MAP2K1,DUSP16,JAK1
33	REACTOME_PTK6_REGULATES_RHO_GTPASES_RAS_GTPASE_AND_MAP_KINASES	0.00214133	0.0141606	0.818526	2.2761	0	13	PTK6,BCAR1,DOCK1,RAC1,RASA1,RHOA,CRK,KRAS,HRAS,ARHGAP35,PXN
34	REACTOME_TBC_RABGAPS	0.00218341	0.0141606	0.617884	2.27141	0	41	ARF6,TBC1D7,RAB6A,RAB8B,RAB5B,GABARAPL2,OPTN,TBC1D10A,RAB11B,RAB5A,MAP1LC3B,RAB5C,RAB7A,TBC1D14,RAB33B,GGA3,RAB4A,TBC1D16,TBC1D10B,TBC1D25,GGA1,TBC1D20,SYTL1,TBC1D2,RAB8A,ULK1
35	REACTOME_RAC3_GTPASE_CYCLE	0.00224215	0.0141606	0.536336	2.26587	0	84	EPHA2,WASF2,NCF1,TAOK3,NCKAP1,ARHGAP17,PAK4,CDC42EP1,EMD,BAIAP2L1,TIAM1,RAC3,BCR,ITGB1,ABI1,ARHGAP1,SLC1A5,RAPGEF1,OCRL,PGRMC2,RAB7A,LMAN1,DSG2,BAIAP2,CYFIP1,PAK2,ARHGAP21,ESYT1,ABR,VAV2,ARHGAP35,GIT1,SRGAP2,TRIO,IL32,MPP7,JAG1,VAMP3,ARHGAP5,FERMT2,LAMTOR
36	REACTOME_SIGNALING_BY_INTERLEUKINS	0.00233645	0.0141606	0.440277	2.26245	0	363	PIM1,SQSTM1,UBC,DUSP7,JUNB,PTPN12,SMAD3,FOXO3,JUN,STX1A,SHC1,PELI1,IRS2,PTGS2,IL6R,IL36G,TGFB1,SDC1,LYN,TNIP2,MSN,FSCN1,HMOX1,MAPK3,VEGFA,GAB2,IL1RN,RELA,CRKL,PTAFR,CEBPD,PPP2CB,HIF1A,SMARCA4,SOCS3,CNN2,BCL2L1,MAP2K3,FOS,MCL1,SOD2,IRAK2,MAPKAPK2,TNFRSF1A,
37	REACTOME_RUNX2_REGULATES_OSTEOBLAST_DIFFERENTIATION	0.00215054	0.0141606	0.714383	2.25943	0	20	HES1,CBFB,MAPK3,SRC,YAP1,MAF,YES1,RUNX2,SATB2,HEY1,HDAC6,ABL1,COL1A1,MAPK1
38	REACTOME_SIGNALING_BY_MET	0.00232558	0.0141606	0.560188	2.25314	0	69	UBC,ARF6,SHC1,SPINT1,CRKL,LAMC1,ITGA3,SRC,RANBP9,PTPN1,SH3GL1,LAMC2,RAC1,ITGB1,RAPGEF1,SH3KBP1,SPINT2,GRB2,LAMB3,PTPRJ,LAMB1,CRK,LAMA3,GAB1,CBL,KRAS,HRAS,TNS4,STAT3,GGA3,RAB4A,MUC20,RAP1A,STAM,RAP1B,MET,LAMB2,PTPN2,COL1A1,PTK2,PIK3CA
39	REACTOME_FOXO_MEDIATED_TRANSCRIPTION	0.00228833	0.0141606	0.578865	2.24532	0	53	SREBF1,GADD45A,BBC3,SMAD3,FOXO3,DDIT3,CCNG2,CDKN1B,SOD2,FBXO32,CDKN1A,AKT2,SFN,YWHAZ,AKT1,YWHAG,KLF4,STK11,BCL6,PPARGC1A,BCL2L11,PCBP4,PINK1,FOXO1,AKT3,KAT2B,YWHAQ,BTG1,SIRT1
40	REACTOME_EUKARYOTIC_TRANSLATION_ELONGATION	0.00228833	0.0141606	0.523393	2.23964	0	91	EEF2,RPS2,RPL18A,RPS9,RPLP2,EEF1A2,RPL14,RPS15A,RPL13,RPL3,RPS8,RPL18,RPL29,RPL24,RPL34,RPL22L1,RPL17,RPL28,RPL12,RPL8,RPS18,RPS12,RPL32,RPS19,RPLP1,RPL4,RPS13,RPL36,RPS20,RPL9,RPL39L,RPLP0,RPL10,RPS24,RPL27A,RPS28,RPS3,RPL19,RPL31,RPS29,EEF1A1,RPL35,RPS2
41	REACTOME_NUCLEAR_EVENTS_KINASE_AND_TRANSCRIPTION_FACTOR_ACTIVATION	0.00232019	0.0141606	0.579347	2.23197	0	55	DUSP7,JUNB,JUND,TRIB1,NAB2,FOSL1,ID1,MAPK3,PPP2CB,FOS,MAPKAPK2,RPS6KA1,PPP2R1A,FOSB,PPP2CA,MEF2D,ELK1,DNM2,CHD4,RPS6KA2,MAPK14,MEF2A,PPP2R5D,SRF,DUSP6
42	REACTOME_NOTCH1_INTRACELLULAR_DOMAIN_REGULATES_TRANSCRIPTION	0.00225225	0.0141606	0.5864	2.23158	0	46	HES1,HDAC5,UBC,HIF1A,TLE3,TLE1,TLE4,TLE2,HDAC11,HEY1,TBL1X,HDAC6,CDK8,NCOR2,MAML1,NCOR1,MYC,KAT2A,KAT2B,HDAC7
43	REACTOME_EPHB_MEDIATED_FORWARD_SIGNALING	0.0021978	0.0141606	0.613702	2.22976	0	40	ACTG1,WASL,EFNB1,LYN,SRC,TIAM1,EPHB3,EPHB4,RAC1,ACTB,RASA1,LIMK1,RHOA,YES1,SDC2,CFL1,HRAS,ITSN1,EPHB2,PTK2,PAK1,ARPC5,ARPC2,ROCK1
44	REACTOME_SIGNALING_BY_TGF_BETA_RECEPTOR_COMPLEX	0.00227273	0.0141606	0.547403	2.22728	0	74	UBC,PPP1R15A,JUNB,SMAD3,TGFB1,PARD3,SP1,SMURF1,MAPK3,F11R,UBE2M,CCNK,SERPINE1,TGIF1,STRAP,RHOA,ARHGEF18,CGN,PPM1A,CBL,CDK9,FURIN,CDK8,CDKN2B,NEDD4L,E2F5,NCOR2,NCOR1,PRKCZ,MYC,PPP1CB,SMAD7,TGFBR1,SMAD2,MAPK1,PPP1CA,RNF111,PARD6A,UBE2D3,USP9X,STUB1,PPP1CC,S
45	REACTOME_CELLULAR_RESPONSE_TO_STARVATION	0.002457	0.0141606	0.485758	2.22618	0	148	RRAGD,CEBPB,DDIT3,ATF3,RHEB,ATP6V0B,RPS2,RRAGC,ATP6V0D1,ATP6V1A,SEC13,ATP6V1H,TCIRG1,GCN1,RPL18A,RPS9,RPLP2,TRIB3,FNIP2,EIF2S3,LAMTOR5,ATP6V1F,SESN2,RPL14,RPS15A,NPRL3,ATF4,ATP6V1C2,RPL13,FNIP1,ATP6V0E2,RPL3,RPS8,LAMTOR1,RPL18,RPL29,RPL24,RPL34,RPL22L1,ML
46	REACTOME_EGFR_DOWNREGULATION	0.00214592	0.0141606	0.640781	2.22294	0	30	UBC,EREG,HBEGF,PTPN12,EPS15L1,EGF,SH3GL1,AREG,SH3KBP1,GRB2,TGFA,EPN1,PTPN3,CBL,ARHGEF7,SPRY1,PTPRK,STAM
47	REACTOME_RAB_GEFS_EXCHANGE_GTP_FOR_GDP_ON_RABS	0.00220264	0.0141606	0.521953	2.2191	0	85	RAB21,RAB14,RAB32,RAB6A,RAB8B,RAB5B,RAB3A,GDI1,SBF2,AKT2,TRAPPC9,RAB10,RAB5A,DENND2B,TRAPPC1,DENND1C,RAB5C,RAB7A,DENND2C,RAB12,AKT1,RAB1A,HPS4,DENND1A,DENND5A,RAB13,MON1B,RAB27A,DENND3,TRAPPC10,RAB1B,GAPVD1,TRAPPC11,SBF1,DENND6A,DENND5B,AKT3,CCZ1B,ALS2CL,
48	REACTOME_MAP2K_AND_MAPK_ACTIVATION	0.00219298	0.0141606	0.624197	2.21844	0	34	ACTG1,MARK3,MAPK3,MAP2K2,SRC,ARAF,ACTB,CSK,RAF1,MAP2K1,KRAS,HRAS,TLN1,VCL,ARRB2,RAP1A,IL17RD,RAP1B,MAPK1,BRAF,LAMTOR3,ITGB3,YWHAB,IQGAP1
49	REACTOME_WNT_MEDIATED_ACTIVATION_OF_DVL	0.0021692	0.0141606	0.920239	2.21841	0	8	PIP5K1B,CSNK1E,DVL1,CSNK2A2,CSNK2A1,DVL2,DVL3
50	REACTOME_RUNX2_REGULATES_BONE_DEVELOPMENT	0.00208768	0.0141606	0.664478	2.21796	0	26	HES1,CBFB,MAPK3,SRC,YAP1,RBM14,MAF,YES1,RUNX2,SATB2,HEY1,HDAC6,ABL1
51	REACTOME_SYNTHESIS_OF_ACTIVE_UBIQUITIN_ROLES_OF_E1_AND_E2_ENZYMES	0.00214592	0.0141606	0.638504	2.21504	0	30	UBC,UBE2R2,UBE2D2,UBE2G1,UBE2H,CDC34,UBE2S,UBE2B,UBA1,UBE2E3,OTULIN,USP7,UBE2Z,UBE2A
52	REACTOME_EPHRIN_SIGNALING	0.00210526	0.0141606	0.735835	2.21304	0	17	NCK2,EFNB1,SRC,EPHB3,EPHB4,RAC1,SDCBP,PAK2,GIT1,ARHGEF7,MYL12A,EPHB2,PAK1
53	REACTOME_NON_INTEGRIN_MEMBRANE_ECM_INTERACTIONS	0.00225734	0.0141606	0.574534	2.20997	0	49	SDC4,TGFB1,SDC1,LAMC1,ITGB5,LAMC2,ITGB1,DDR1,LAMB3,PRKCA,LAMB1,ACTN1,ITGA6,ITGB4,LAMA3,SDC2,COL4A2,TNC,DAG1,COL4A5,CASK,HSPG2,PDGFB,LAMB2,AGRN,COL4A6,PDGFA,COL1A1
54	REACTOME_SIGNALING_BY_MODERATE_KINASE_ACTIVITY_BRAF_MUTANTS	0.00215517	0.0141606	0.61295	2.20977	0	37	ACTG1,MARK3,MAPK3,MAP2K2,SRC,ARAF,ACTB,CSK,RAF1,MAP2K1,MAP3K11,KRAS,HRAS,TLN1,VCL,ARRB2,RAP1A,CAMK2D,RAP1B,CAMK2G,MAPK1,BRAF
55	REACTOME_MET_PROMOTES_CELL_MOTILITY	0.00219298	0.0141606	0.618091	2.19674	0	34	CRKL,LAMC1,ITGA3,SRC,LAMC2,RAC1,ITGB1,RAPGEF1,GRB2,LAMB3,LAMB1,CRK,LAMA3,GAB1,TNS4,RAP1A,RAP1B,MET,LAMB2,COL1A1,PTK2
56	REACTOME_RHO_GTPASE_CYCLE	0.00229358	0.0141606	0.41795	2.19392	0	415	GRB7,TRIP10,RHOV,EPHA2,PLEKHG3,WASF2,CDC42EP5,EFHD2,ACTG1,NCK2,PLEKHG6,NCF1,WASL,TAOK3,PKN1,ARHGEF3,TJP2,AKAP13,RHPN2,JUP,NCKAP1,CAPZB,ANKLE2,GFOD1,ARHGAP17,PAK4,WHAMM,CDC42EP1,FGD4,DOCK6,ARHGEF10L,EMD,RHOB,ARHGAP27,SRRM1,GNA13,DIAPH1,RND1,RAC2,SPTBN1,SRC
57	REACTOME_RAB_GERANYLGERANYLATION	0.00229885	0.0141606	0.558535	2.1852	0	59	RAB21,RAB14,RAB32,RAB6A,RAB8B,RAB5B,RAB3A,RAB22A,RAB11B,RAB10,RAB5A,RAB5C,RAB7A,RAB12,RAB1A,RABGGTB,PTP4A2,RAB13,RAB27A,RABGGTA,RAB1B,RAB2A,RAB29,RAB33B,RAB4A,RAB26,RAB25,RAB3D
58	REACTOME_ONCOGENIC_MAPK_SIGNALING	0.00227273	0.0141606	0.536644	2.18351	0	74	DUSP7,ACTG1,MARK3,MAPK3,LMNA,SND1,MAP2K2,SPRED2,SRC,ARAF,ESRP1,DUSP8,DUSP10,ACTB,CSK,QKI,FAM131B,MPRIP,KDM7A,RAF1,MAP2K1,DUSP16,AGTRAP,MAP3K11,KRAS,HRAS,AP3B1,TLN1,VCL,BCL2L11,ARRB2,RAP1A,DUSP6,CLCN6,CAMK2D,RAP1B,FXR1,NF1,PPP1CB,CAMK2G,SPRED1,MAPK1,BRAF,S
59	REACTOME_G_ALPHA_Z_SIGNALLING_EVENTS	0.00214592	0.0141606	0.626694	2.17407	0	30	GNAS,GNB2,GNB1,GNAI2,PRKCD,PRKCA,GNAI1,ADCY7,GNG5,RGS17,GNG4,ADCY9,PRKCH,GNAI3
60	REACTOME_ESTROGEN_DEPENDENT_NUCLEAR_EVENTS_DOWNSTREAM_OF_ESR_MEMBRANE_SIGNALING	0.00215054	0.0141606	0.665152	2.17303	0	24	EREG,HBEGF,FOXO3,MAPK3,CDKN1B,FOS,EGF,AKT2,AREG,ELK1,TGFA,AKT1,SRF,BCL2,AKT3,CCND1,PTK2,MAPK1
61	REACTOME_CHOLESTEROL_BIOSYNTHESIS	0.00215054	0.0141606	0.664786	2.17184	0	24	SQLE,MSMO1,DHCR7,MVD,HMGCS1,IDI1,HSD17B7,EBP,FDPS,FDFT1,SC5D,CYP51A1,ACAT2,LSS,DHCR24,MVK
62	REACTOME_EXTRA_NUCLEAR_ESTROGEN_SIGNALING	0.0022779	0.0141606	0.54659	2.16891	0	63	EREG,HBEGF,HSPB1,FOXO3,SHC1,GNB2,MAPK3,CDKN1B,GNB1,FOS,SRC,GNAI2,ZDHHC7,STRN,EGF,AKT2,SPHK1,AREG,ELK1,TGFA,AKT1,GNAI1,GNG5,KRAS,HRAS,GNG4,IGF1R,PDPK1,GNAI3,SRF,BCL2,PRKCZ,AKT3,CCND1,MMP2,PTK2,MAPK1,MMP9,PIK3CA,GNB5
63	REACTOME_REGULATION_OF_CHOLESTEROL_BIOSYNTHESIS_BY_SREBP_SREBF	0.00232019	0.0141606	0.562526	2.16716	0	55	INSIG1,SREBF1,SQLE,FASN,SEC24A,SCD,SP1,DHCR7,MVD,HMGCS1,IDI1,SREBF2,SEC24D,FDPS,SEC23A,ACACA,FDFT1,PPARA,SC5D,KPNB1,SEC24C,NCOA6,CYP51A1,RXRA,CARM1,TBL1X,MTF1,HELZ2,LSS,MVK,MBTPS1,SCAP
64	REACTOME_INNATE_IMMUNE_SYSTEM	0.00257069	0.0144299	0.398029	2.16674	0	796	HSPA1A,HSPA1B,HSPA6,BRI3,PLAUR,CEACAM1,UBC,DUSP7,FTL,PLAU,JUN,WASF2,TMBIM1,RAP2B,SHC1,KCMF1,ACTG1,ADAM8,PELI1,BCL10,HLA-A,AGPAT2,NCF1,POLR3D,WASL,LYN,PCBP2,TNIP2,TICAM1,RAB14,EEF2,AHCYL1,HMOX1,FTH1,JUP,MAPK3,NCKAP1,ATP6V0B,UBE2D2,UBE2M,GM2A,GAB2,CTSD,CD81
65	REACTOME_SIGNALLING_TO_RAS	0.00210526	0.0141606	0.704372	2.1645	0	18	SHC1,SRC,MAPKAPK2,MAPK13,GRB2,KRAS,RALB,HRAS,MAPK14,RALA,SHC2
66	REACTOME_RAC2_GTPASE_CYCLE	0.00225225	0.0141606	0.515489	2.16184	0	81	EPHA2,WASF2,NCF1,TAOK3,NCKAP1,ANKLE2,ARHGAP17,PAK4,CDC42EP1,EMD,RAC2,BAIAP2L1,TIAM1,BCR,DOCK1,ITGB1,ABI1,DEF6,ARHGAP1,ARHGDIA,PGRMC2,RAB7A,LMAN1,DSG2,CYFIP1,VAV1,PAK2,PLD2,ARHGAP21,CDC42EP4,ESYT1,ABR,VAV2,ARHGAP35,GIT1,TRIO,MPP7,VAMP3
67	REACTOME_ACTIVATION_OF_THE_MRNA_UPON_BINDING_OF_THE_CAP_BINDING_COMPLEX_AND_EIFS_AND_SUBSEQUENT_BINDING_TO_43S	0.00229885	0.0141606	0.552404	2.16121	0	59	PABPC1,RPS2,EIF3F,EIF4A1,RPS9,EIF4EBP1,EIF4G1,EIF2S3,EIF3G,EIF4H,EIF3A,EIF4B,RPS15A,EIF3H,RPS8,EIF3I,EIF4A2,EIF4E,RPS18,RPS12,EIF2S2,RPS19,RPS13,RPS20,RPS24,EIF3D,RPS28,RPS3,RPS29,RPS27A,RPS10,RPS4X,RPS14,RPS16,RPS3A,EIF3B,RPS6,FAU,RPS27,EIF3C,RPS15,RPS21
68	REACTOME_UNFOLDED_PROTEIN_RESPONSE_UPR	0.00223214	0.0141606	0.508188	2.16103	0	86	CEBPB,SHC1,DDIT3,ATF3,HERPUD1,DNAJB9,EDEM1,HSPA5,ERN1,HDGF,LMNA,SERP1,ATP6V0D1,CREB3L1,MYDGF,EIF2S3,CTDSP2,PDIA6,YIF1A,ACADVL,KLHDC3,GFPT1,ADD1,KHSRP,PDIA5,SRPRA,HSP90B1,WIPI1,TPP1,KDELR3,TLN1,PPP2R5B,CREB3L2,GSK3A,CREBRF,ARFGAP1,CXCL8,SYVN1,MBTPS1,ATF4,E
69	REACTOME_TGF_BETA_RECEPTOR_SIGNALING_ACTIVATES_SMADS	0.00215054	0.0141606	0.61287	2.15537	0	32	UBC,PPP1R15A,SMAD3,TGFB1,SMURF1,UBE2M,STRAP,CBL,FURIN,NEDD4L,PPP1CB,SMAD7,TGFBR1,SMAD2,PPP1CA,STUB1,PPP1CC
70	REACTOME_TGF_BETA_RECEPTOR_SIGNALING_IN_EMT_EPITHELIAL_TO_MESENCHYMAL_TRANSITION	0.0021097	0.0141606	0.727875	2.15506	0	16	UBC,TGFB1,PARD3,SMURF1,F11R,RHOA,ARHGEF18,CGN
71	REACTOME_RESPONSE_TO_ELEVATED_PLATELET_CYTOSOLIC_CA2	0.00230947	0.0141606	0.497288	2.15357	0	98	TGFB1,HSPA5,VEGFA,ECM1,FLNA,HABP4,FAM3C,TOR4A,MANF,WDR1,EGF,ACTN4,GAS6,APLP2,APP,SERPINE1,TMSB4X,STXBP2,CD63,ENDOD1,CAP1,TIMP3,PRKCA,ACTN1,QSOX1,LHFPL2,PFN1,STX4,VEGFB,CD109,OLA1,CFL1,PSAP,TLN1,VCL,ALDOA,CALU,NHLRC2,TIMP1,LAMP2,PCYOX1L,GTPBP2,TUBA4A,LGALS
72	REACTOME_DISEASES_OF_SIGNAL_TRANSDUCTION_BY_GROWTH_FACTOR_RECEPTORS_AND_SECOND_MESSENGERS	0.00233645	0.0141606	0.414331	2.14665	0	380	PIM1,HES1,SQSTM1,HDAC5,UBC,EREG,DUSP7,PPP2R5A,HBEGF,JUNB,NR4A1,PTPN12,CEBPB,SMAD3,FOXO3,SHC1,ACTG1,IRS2,MARK3,TGFB1,LYN,MSN,PPFIBP1,MAPK3,AXIN1,CDKN1B,GAB2,LMNA,PPP2CB,BCL2L1,SND1,MAP2K2,FZD5,RAC2,SPTBN1,SPRED2,SRC,RHOG,STRN,EGF,CDKN1A,PPP2R1A,MYO18A,BCL2
73	REACTOME_ERYTHROPOIETIN_ACTIVATES_RAS	0.00214133	0.0141606	0.770488	2.14252	0	13	SHC1,IRS2,LYN,CRKL,RAPGEF1,GRB2,VAV1,KRAS,HRAS
74	REACTOME_SIGNALING_BY_ERBB2	0.00223214	0.0141606	0.557685	2.13982	0	48	GRB7,UBC,EREG,HBEGF,PTPN12,SHC1,DIAPH1,SRC,EGF,PTK6,AKT2,PRKCD,GRB2,RHOA,YES1,PRKCA,AKT1,GAB1,ERBB2,KRAS,HRAS,NRG2
75	REACTOME_SIGNALLING_TO_ERKS	0.00217865	0.0141606	0.612753	2.13904	0	31	SHC1,MAPK3,CRKL,MAP2K2,SRC,MAPKAPK2,MAPK13,RIT1,RAPGEF1,GRB2,MAP2K1,CRK,KRAS,RALB,HRAS,MAPK14,RALA,RAP1A,SHC2,MAPK1,BRAF
76	REACTOME_SUPPRESSION_OF_PHAGOSOMAL_MATURATION	0.00218341	0.0141606	0.795349	2.13659	0	12	UBC,CORO1A,ATP6V1H,RAB5A,KPNB1,RAB7A
77	REACTOME_NGF_STIMULATED_TRANSCRIPTION	0.00219298	0.0141606	0.603456	2.13455	0	33	JUNB,JUND,TRIB1,NAB2,FOSL1,ID1,FOS,FOSB,MEF2D,ELK1,DNM2
78	REACTOME_PLASMA_LIPOPROTEIN_ASSEMBLY_REMODELING_AND_CLEARANCE	0.00223214	0.0141606	0.555968	2.13323	0	48	NPC1,LIPG,LDLR,LDLRAP1,PCSK9,SCARB1,CLTA,PRKACA,AP2A1,AMN,AP2A2,AP2S1,CLTC,VLDLR,P4HB,BMP1,ABCG1,HDLBP,ANGPTL4,PLTP,FURIN,LSR,MBTPS1,NR1H2,AP2B1
79	REACTOME_P75_NTR_RECEPTOR_MEDIATED_SIGNALLING	0.00228833	0.0141606	0.497968	2.13085	0	91	SQSTM1,UBC,ARHGEF3,AKAP13,RTN4R,RELA,FGD4,ARHGEF10L,RTN4,GNA13,TIAM1,APH1A,RAC1,NGFR,IRAK1,ARHGEF16,ARHGEF2,ARHGEF5,ADAM17,ARHGDIA,PLEKHG5,RHOA,NFKBIA,ARHGEF18,ARHGEF12,VAV1,RIPK2,AATF,NGEF,ARHGEF1,ABR,PRKCI,VAV2,BCL2L11,ARHGEF4,NFKB1,ARHGEF7,ITSN1,TRIO,F
80	REACTOME_ADHERENS_JUNCTIONS_INTERACTIONS	0.0021645	0.0141606	0.652209	2.12484	0	23	NECTIN4,ACTG1,JUP,NECTIN2,NECTIN1,CDH11,ACTB,CTNND1,CDH3,CTNNB1,CDH1,PVR,CTNNA1
81	REACTOME_SHC1_EVENTS_IN_ERBB2_SIGNALING	0.00218818	0.0141606	0.66606	2.12482	0	21	EREG,HBEGF,PTPN12,SHC1,EGF,PRKCD,GRB2,PRKCA,ERBB2,KRAS,HRAS,NRG2
82	REACTOME_EPH_EPHRIN_MEDIATED_REPULSION_OF_CELLS	0.00217865	0.0141606	0.563341	2.12315	0	44	EPHA2,ACTG1,EFNB1,LYN,SRC,TIAM1,EPHB3,APH1A,EPHB4,RAC1,CLTA,ACTB,AP2A1,AP2A2,AP2S1,CLTC,YES1,EFNA3,CLTB,VAV2,AP2B1,MMP2,EPHB2,EFNA5,NCSTN,MMP9,AP2M1
83	REACTOME_NETRIN_1_SIGNALING	0.00217865	0.0141606	0.582877	2.12178	0	39	SIAH2,WASL,UNC5B,SRC,MAPK13,NTN1,DOCK1,RAC1,MYO10,SIAH1,ABLIM3,RGMA,EZR,MAPK14,TRIO,PITPNA,NEO1,PTK2,PAK1,ABLIM1,PTPN11,ABLIM2,TRPC6,NTN4
84	REACTOME_FCERI_MEDIATED_CA_2_MOBILIZATION	0.00215983	0.0141606	0.655612	2.12036	0	22	SHC1,LYN,AHCYL1,ITPR3,PPP3R1,PLCG2,GRB2,PPP3CB,VAV1,NFATC1,VAV2,TEC,PPP3CA
85	REACTOME_SYNDECAN_INTERACTIONS	0.00215983	0.0141606	0.655516	2.12005	0	22	SDC4,TGFB1,SDC1,ITGB5,ITGB1,PRKCA,ACTN1,ITGA6,ITGB4,SDC2,TNC
86	REACTOME_VESICLE_MEDIATED_TRANSPORT	0.00241546	0.0141606	0.395892	2.11918	0	585	UBC,TRIP10,EREG,HBEGF,FTL,LDLR,ARF6,RAB21,ACTG1,MVB12A,EPS15L1,WASL,SEC24A,GRK2,TBC1D7,RAB14,LDLRAP1,RAB32,FTH1,HSPH1,GJB3,ACBD3,CAPZB,KDELR1,SCARB1,RAB6A,UBAP1,UBQLN1,SEC24D,DVL2,SPTBN1,RAB8B,RAB5B,KIF16B,RAB3A,SRC,GDI1,PICALM,VPS37C,MYO1C,EGF,VPS53,GABA
87	REACTOME_REGULATION_OF_INSULIN_SECRETION	0.00228833	0.0141606	0.546085	2.11817	0	53	STX1A,GNAS,SLC2A1,GNB2,AHCYL1,GNB1,ITPR3,GNA15,STXBP1,GNAI2,PRKACA,ACSL3,PRKCA,GNAI1,PLCB3,GNG5,GNG4,MARCKS,GNA11,ACSL4,RAP1A
88	REACTOME_ACTIVATION_OF_BAD_AND_TRANSLOCATION_TO_MITOCHONDRIA	0.00217865	0.0141606	0.729967	2.11495	0	15	PPP3CC,AKT2,SFN,PPP3R1,YWHAZ,AKT1,YWHAG,YWHAH,BCL2,AKT3,YWHAQ
89	REACTOME_RAF_ACTIVATION	0.00215054	0.0141606	0.601212	2.11437	0	32	PPP2R5A,MARK3,PPP2CB,MAP2K2,SRC,PPP2R1A,ARAF,PPP2CA,RAF1,MAP2K1,MAP3K11,KRAS,HRAS,PPP2R5B,PPP2R5D,CAMK2D,PPP1CB,CAMK2G,BRAF,PPP2R5E,PPP2R5C,PPP1CC,YWHAB
90	REACTOME_SIGNALING_BY_EGFR	0.00225734	0.0141606	0.548991	2.11172	0	49	UBC,EREG,HBEGF,PTPN12,SHC1,EPS15L1,SRC,EGF,SH3GL1,ADAM17,AREG,SH3KBP1,GRB2,TGFA,CSK,EPN1,GAB1,PTPN3,CBL,KRAS,HRAS,ARHGEF7,PXN,SPRY1,PTPRK,STAM
91	REACTOME_METABOLISM_OF_LIPIDS	0.00243309	0.0141606	0.392474	2.10791	0	621	INSIG1,MBOAT2,NR1D1,SREBF1,HSD11B2,FA2H,LPCAT4,PPARD,SLC27A1,PI4K2A,SQLE,OSBPL2,PIP5K1B,MSMO1,ABHD3,PTGS2,GPX4,AGPAT2,FASN,SEC24A,TECR,LPIN1,SCD,SP1,ESRRA,ME1,RAB14,ETNK2,CSNK2A2,DHCR7,SGPP2,MVD,MID1IP1,CSNK2A1,GM2A,ELOVL7,ECI1,UBE2I,PIP5K1A,HMGCS1,PRKD2,
92	REACTOME_TIGHT_JUNCTION_INTERACTIONS	0.0021645	0.0141606	0.645776	2.10388	0	23	CLDN4,CLDN7,PARD3,F11R,CRB3,PARD6B,CLDN5,CLDN3,CLDN12,PRKCI
93	REACTOME_P75NTR_SIGNALS_VIA_NF_KB	0.00217865	0.0141606	0.725669	2.1025	0	15	SQSTM1,UBC,RELA,NGFR,IRAK1,NFKBIA,RIPK2,PRKCI,NFKB1
94	REACTOME_RAC1_GTPASE_CYCLE	0.00245098	0.0141606	0.451147	2.10064	0	164	EPHA2,PLEKHG3,WASF2,PLEKHG6,NCF1,WASL,TAOK3,PKN1,NCKAP1,ARHGAP17,PAK4,CDC42EP1,DOCK6,EMD,ARHGAP27,GNA13,FARP1,BAIAP2L1,TIAM1,BCR,DOCK1,RAC1,ITGB1,WIPF2,ABI1,DEF6,PAK6,RALBP1,ARHGAP1,ARHGEF5,SH3BP1,SLC1A5,ARHGDIA,DOCK9,ARHGAP23,RAB7A,MYO9B,ARHGEF18,BAIAP2,
95	REACTOME_MEMBRANE_TRAFFICKING	0.00248139	0.0141606	0.3929	2.09454	0	566	UBC,TRIP10,EREG,HBEGF,FTL,LDLR,ARF6,RAB21,ACTG1,MVB12A,EPS15L1,WASL,SEC24A,GRK2,TBC1D7,RAB14,LDLRAP1,RAB32,FTH1,GJB3,ACBD3,CAPZB,KDELR1,RAB6A,UBAP1,UBQLN1,SEC24D,DVL2,SPTBN1,RAB8B,RAB5B,KIF16B,RAB3A,SRC,GDI1,PICALM,VPS37C,MYO1C,EGF,VPS53,GABARAPL2,SBF2,DC
96	REACTOME_NF_KB_IS_ACTIVATED_AND_SIGNALS_SURVIVAL	0.00218341	0.0141606	0.777277	2.08804	0	12	SQSTM1,UBC,RELA,NGFR,IRAK1,NFKBIA,NFKB1
97	REACTOME_SHC1_EVENTS_IN_EGFR_SIGNALING	0.00217391	0.0141606	0.739059	2.08573	0	14	EREG,HBEGF,SHC1,EGF,AREG,GRB2,TGFA,KRAS,HRAS
98	REACTOME_FOXO_MEDIATED_TRANSCRIPTION_OF_CELL_CYCLE_GENES	0.00217865	0.0141606	0.718728	2.08239	0	15	GADD45A,SMAD3,FOXO3,CCNG2,CDKN1B,CDKN1A,KLF4,PCBP4,FOXO1,BTG1,SMAD2
99	REACTOME_EUKARYOTIC_TRANSLATION_INITIATION	0.00235849	0.0141606	0.468741	2.07817	0	118	PABPC1,RPS2,EIF3F,EIF4A1,RPL18A,RPS9,EIF4EBP1,RPLP2,EIF4G1,EIF2S3,EIF3G,EIF4H,EIF3A,EIF4B,RPL14,RPS15A,RPL13,EIF2B5,EIF3H,RPL3,RPS8,RPL18,EIF3I,RPL29,RPL24,RPL34,EIF4A2,RPL22L1,EIF4E,RPL17,RPL28,RPL12,RPL8,RPS18,RPS12,EIF2B2,EIF2S2,RPL32,RPS19,RPLP1,RPL4,
100	REACTOME_CIRCADIAN_CLOCK	0.00229358	0.0141606	0.518657	2.0774	0	67	DBP,NR1D1,BHLHE40,SREBF1,NFIL3,UBC,PER1,CSNK1E,HIF1A,CRTC2,SERPINE1,CRY2,PPARA,MEF2D,NCOA6,CSNK1D,CRTC3,RXRA,CARM1,NOCT,NAMPT,NPAS2,PPARGC1A,TBL1X,HELZ2,SIK1,RAI1,NCOR1,ARNTL2,BHLHE41,PPP1CB,SIRT1,RORA,CPT1A,KLF15,PPP1CA
101	REACTOME_GLYCEROPHOSPHOLIPID_BIOSYNTHESIS	0.00238663	0.0141606	0.475959	2.07501	0	107	MBOAT2,LPCAT4,ABHD3,AGPAT2,LPIN1,ETNK2,CSNK2A2,CSNK2A1,ABHD4,DGAT1,GPCPD1,MIGA2,GPAT3,OSBPL10,SLC44A2,PLA2G3,PNPLA2,CDIPT,MFSD2A,PITPNM1,CDS1,PNPLA3,PLAAT3,PLD3,ACHE,CHKA,MBOAT7,CPNE1,PLD2,PCYT2,LPGAT1,PNPLA8,PTDSS2,STARD10,DDHD2,PLA2G4E,AGPAT1,SLC44A1,DG
102	REACTOME_INITIATION_OF_NUCLEAR_ENVELOPE_NE_REFORMATION	0.00212766	0.0141606	0.664064	2.07482	0	19	PPP2R2A,SIRT2,ANKLE2,LMNA,EMD,PPP2R1A,PPP2CA,KPNB1,LEMD2
103	REACTOME_SIGNALING_BY_NOTCH1	0.00227273	0.0141606	0.515497	2.07394	0	68	HES1,HDAC5,UBC,HIF1A,TLE3,TLE1,APH1A,TLE4,ADAM17,TLE2,DTX2,HDAC11,HEY1,DNER,TBL1X,HDAC6,ARRB2,CDK8,NCOR2,MAML1,MIB1,NCOR1,ITCH,MYC,KAT2A,KAT2B,JAG1,HDAC7
104	REACTOME_SIGNALING_BY_TGFB_FAMILY_MEMBERS	0.00229885	0.0141606	0.481874	2.07187	0	95	UBC,PPP1R15A,JUNB,SMAD3,TGFB1,PARD3,SP1,DRAP1,SMURF1,MAPK3,F11R,UBE2M,CCNK,BMP2,SERPINE1,TGIF1,STRAP,RHOA,ARHGEF18,CGN,FST,ACVR1B,PPM1A,CBL,CDK9,SMAD9,FURIN,CDK8,CDKN2B,NEDD4L,E2F5,NCOR2,NCOR1,PRKCZ,MYC,ACVR1C,FSTL3,PPP1CB,SMAD7,TGFBR1,SMAD2,MAPK1
105	REACTOME_MAPK_FAMILY_SIGNALING_CASCADES	0.00240964	0.0141606	0.420386	2.07172	0	261	DUSP1,DUSP5,DNAJB1,UBC,EREG,DUSP7,PPP2R5A,HBEGF,HSPB1,FOXO3,JUN,SHC1,CDC42EP5,ACTG1,IRS2,MARK3,IL6R,ABHD17C,ETV4,DUSP2,ARTN,MAPK3,PPP2CB,BCL2L1,PTPRA,MAP2K2,SPTBN1,SPRED2,SRC,RANBP9,EGF,NCOA3,PPP2R1A,MAPK6,PEA15,CUL3,ARAF,RAC1,PSME4,DUSP8,DUSP10,PRKACA,AC
106	REACTOME_SIGNAL_TRANSDUCTION_BY_L1	0.00210526	0.0141606	0.687111	2.0665	0	17	CSNK2A2,MAPK3,CSNK2A1,MAP2K2,ITGA5,RAC1,ITGB1,MAP2K1,VAV2,PAK1,MAPK1
107	REACTOME_CTLA4_INHIBITORY_SIGNALING	0.00212766	0.0141606	0.661165	2.06576	0	19	PPP2R5A,LYN,PPP2CB,SRC,PPP2R1A,AKT2,PPP2CA,YES1,AKT1,PPP2R5B,PPP2R5D,AKT3,CD86,PPP2R5E,PTPN11,PPP2R5C
108	REACTOME_INSERTION_OF_TAIL_ANCHORED_PROTEINS_INTO_THE_ENDOPLASMIC_RETICULUM_MEMBRANE	0.00218818	0.0141606	0.647532	2.06571	0	21	STX1A,HMOX1,CAMLG,SERP1,EMD,BAG6,APP,PRNP,VAPA,UBE2J2,GET4,SGTA,UBL4A,CYB5A
109	REACTOME_CELL_EXTRACELLULAR_MATRIX_INTERACTIONS	0.0021097	0.0141606	0.697243	2.06437	0	16	ACTG1,VASP,FLNA,FBLIM1,ITGB1,ACTB,ACTN1,TESK1,PXN,FERMT2,PARVA,ILK
110	REACTOME_P38MAPK_EVENTS	0.00214133	0.0141606	0.741826	2.06282	0	13	SRC,MAPKAPK2,MAPK13,KRAS,RALB,HRAS,MAPK14,RALA
111	REACTOME_G_ALPHA_12_13_SIGNALLING_EVENTS	0.00227273	0.0141606	0.520849	2.05937	0	62	ARHGEF3,AKAP13,GNB2,FGD4,ARHGEF10L,RHOB,GNB1,GNA13,TIAM1,RHOC,ARHGEF16,ARHGEF2,ARHGEF5,PLEKHG5,RHOA,ARHGEF18,ARHGEF12,VAV1,GNG5,NGEF,ARHGEF1,ABR,GNG4,VAV2,ARHGEF4,ARHGEF7,ITSN1,TRIO,FGD1,ARHGEF35,ARHGEF40,PREX1,GNB5,NET1,GNA12,ROCK1,ARHGEF26,KALRN
112	REACTOME_SEMA4D_IN_SEMAPHORIN_SIGNALING	0.00215054	0.0141606	0.62946	2.05643	0	24	RRAS,RHOB,RND1,RHOC,RAC1,MYH14,LIMK1,RHOA,ARHGEF12,ERBB2,MYH9,MYH10,ARHGAP35,SEMA4D,MET,MYL9,ROCK1
113	REACTOME_SPRY_REGULATION_OF_FGF_SIGNALING	0.0021097	0.0141606	0.694303	2.05566	0	16	UBC,MAPK3,PPP2CB,SRC,PPP2R1A,PPP2CA,GRB2,CBL,MAPK1,BRAF,SPRY2,PTPN11
114	REACTOME_DEFECTIVE_INTRINSIC_PATHWAY_FOR_APOPTOSIS	0.00215054	0.0141606	0.627887	2.05129	0	24	FOXO3,JUN,LMNA,CDC25B,SOD2,CAPN2,GOLGA2,CAPN1,APP,CAPNS1,C1QBP
115	REACTOME_GROWTH_HORMONE_RECEPTOR_SIGNALING	0.00212766	0.0141606	0.656401	2.05087	0	19	IRS2,LYN,MAPK3,SOCS3,PTPN1,CISH,ADAM17,SOCS1,STAT5B,STAT3,STAT5A,PTPN6,MAPK1
116	REACTOME_DOWNREGULATION_OF_TGF_BETA_RECEPTOR_SIGNALING	0.00208768	0.0141606	0.61408	2.04974	0	26	UBC,PPP1R15A,SMAD3,TGFB1,SMURF1,STRAP,NEDD4L,PPP1CB,SMAD7,TGFBR1,SMAD2,PPP1CA,STUB1,PPP1CC,RPS27A,UBB,MTMR4,PMEPA1
117	REACTOME_TOLL_LIKE_RECEPTOR_9_TLR9_CASCADE	0.0022779	0.0141606	0.479274	2.04322	0	89	UBC,DUSP7,JUN,PELI1,TNIP2,TICAM1,MAPK3,RELA,ECSIT,PPP2CB,MAP2K3,FOS,IRAK2,MAPKAPK2,RPS6KA1,PPP2R1A,MAPK9,TAB2,IRAK1,APP,PELI2,PPP2CA,ELK1,NFKBIA,NFKB2,RIPK2,MAP3K8,MAP2K1,FBXW11,RPS6KA2,MAPK14,MAP2K7,MEF2A,NFKBIB,PPP2R5D,NFKB1,NKIRAS2,DUSP6
118	REACTOME_RHOQ_GTPASE_CYCLE	0.00235849	0.0141606	0.530014	2.04038	0	57	TRIP10,PLEKHG3,WASL,JUP,GFOD1,ARHGAP17,PAK4,CDC42EP1,ARHGAP1,SLC1A5,SLC4A7,RAB7A,CDC42BPB,RHOQ,PAK2,ARHGAP21,CDC42EP4,FNBP1,GJA1,ARHGAP35,GIT1,ARHGEF7,ITSN1,SRGAP2,SCRIB,MPP7,VAMP3,ARHGAP5,LAMTOR1,ARHGAP32,PAK1,PREX1,WWP2,DLC1,STOM,ARHGAP26
119	REACTOME_CARGO_RECOGNITION_FOR_CLATHRIN_MEDIATED_ENDOCYTOSIS	0.00228833	0.0141606	0.475635	2.03528	0	91	UBC,EREG,HBEGF,LDLR,EPS15L1,GRK2,LDLRAP1,UBQLN1,DVL2,PICALM,EGF,SH3GL1,AAK1,CLTA,AP2A1,STON2,AREG,SH3KBP1,AP2A2,AP2S1,CLTC,GRB2,ITSN2,TGFA,SCARB2,EPN1,COPS7A,FCHO1,CBL,UBQLN2,IGF2R,CLTB,ARRB2,COPS6,ITSN1,FCHO2,AP2B1,VAMP3,STAM
120	REACTOME_G_PROTEIN_BETA_GAMMA_SIGNALLING	0.00210526	0.0141606	0.661925	2.03406	0	18	GNB2,GNB1,AKT2,RHOA,AKT1,PLCB3,GNG5,GNG4,PDPK1,AKT3,PAK1,GNB5
121	REACTOME_SIGNALING_BY_CSF3_G_CSF	0.00205761	0.0141606	0.601295	2.03383	0	27	UBC,SHC1,LYN,UBE2D2,GAB2,SOCS3,GRB2,JAK1,SOCS1,KRAS,STAT5B,STAT3,STAT5A,RNF7,PTPN11,UBE2D3,TYK2,ELOC,RPS27A,UBB,JAK2
122	REACTOME_INSULIN_RECEPTOR_RECYCLING	0.00215054	0.0141606	0.640899	2.02702	0	20	ATP6V0B,ATP6V0D1,ATP6AP1,ATP6V1A,ATP6V1H,TCIRG1,ATP6V1F,INSR,ATP6V0A1,ATP6V1C2,ATP6V0E2
123	REACTOME_CDC42_GTPASE_CYCLE	0.00238663	0.0141606	0.443444	2.02637	0	138	PLEKHG3,CDC42EP5,WASL,JUP,ARHGAP17,PAK4,CDC42EP1,FGD4,DOCK6,ARHGAP27,GNA13,FARP1,TIAM1,BCR,ARHGEF16,WIPF2,DEF6,PAK6,RALBP1,ARHGAP1,ARHGEF5,ARHGDIA,DOCK9,RAB7A,MYO9B,CDC42BPB,SH3PXD2A,BAIAP2,ARHGEF12,PAK2,ARHGAP21,MAP3K11,ARAP1,CDC42EP4,FNBP1,NGEF,ARHGAP44
124	REACTOME_N_GLYCAN_ANTENNAE_ELONGATION	0.00218341	0.0141606	0.753488	2.02414	0	12	MGAT4B,B4GALT5,B4GALT3,B4GALT2,ST6GAL1,B4GALT1,MGAT5,B4GALT4,ST3GAL4,ST8SIA6
125	REACTOME_OPIOID_SIGNALLING	0.00229358	0.0141606	0.504802	2.0219	0	67	GRK2,GNB2,AHCYL1,PPP2CB,PPP3CC,GNB1,ITPR3,GNA15,GNAI2,PPP2R1A,PPP3R1,PRKACA,PPP2CA,PRKCD,PPP3CB,PRKCA,GNAI1,ADCY7,PLCB3,GNG5,GNG4,ADCY9,PDE4A,GNA11,GNAI3,PPP2R5D,PPP3CA,CAMK2D,PRKX,CAMK2G,CAMKK2,MAPK1,GNB5,PPP1CA,PLA2G4A
126	REACTOME_CYTOKINE_SIGNALING_IN_IMMUNE_SYSTEM	0.00248139	0.0141606	0.379206	2.02154	0	566	PIM1,TNFSF9,SQSTM1,UBC,DUSP7,JUNB,PTPN12,SMAD3,FOXO3,JUN,STX1A,SHC1,PELI1,IRS2,PTGS2,IL6R,HLA-A,TRIM29,IL36G,TGFB1,SDC1,LYN,TNIP2,IRF6,MSN,FSCN1,HMOX1,MAPK3,MT2A,IRF1,VEGFA,UBE2D2,UBE2M,CDKN1B,GAB2,IL1RN,RELA,CRKL,PTAFR,CEBPD,HLA-E,PPP2CB,HIF1A,SMARCA4,SO
127	REACTOME_ACYL_CHAIN_REMODELLING_OF_PE	0.00218818	0.0141606	0.632631	2.01818	0	21	MBOAT2,LPCAT4,ABHD4,PLA2G3,PLAAT3,PNPLA8,PLA2G4E,PLBD1,PLA2G4A,PLAAT1,PLA2G4F,LPCAT3
128	REACTOME_MITOPHAGY	0.00209644	0.0141606	0.591865	2.01733	0	28	SQSTM1,UBC,CSNK2A2,CSNK2A1,SRC,MAP1LC3B,MAP1LC3A,TOMM20,PRKN,MFN2,PGAM5,VDAC1,PINK1
129	REACTOME_ACTIVATION_OF_GENE_EXPRESSION_BY_SREBF_SREBP	0.00217391	0.0141606	0.542064	2.01344	0	42	SREBF1,SQLE,FASN,SCD,SP1,DHCR7,MVD,HMGCS1,IDI1,SREBF2,FDPS,ACACA,FDFT1,PPARA,SC5D,NCOA6,CYP51A1,RXRA,CARM1,TBL1X,MTF1,HELZ2,LSS,MVK
130	REACTOME_REGULATION_OF_PTEN_GENE_TRANSCRIPTION	0.00229885	0.0141606	0.514344	2.01231	0	59	HDAC5,RCOR1,RRAGD,JUN,RHEB,MAPK3,PPARG,GATAD2B,RRAGC,PHC2,RBBP7,ATN1,CBX4,MAF1,GATAD2A,LAMTOR5,CHD4,RING1,CBX6,SUZ12,MTA1,PTEN,HDAC7,SNAI2,LAMTOR1,MAPK1,CHD3,MLST8,RRAGA,MTOR,PHC1,LAMTOR3,TP53,RPTOR,HDAC2,HDAC1,MTA2,MTA3,SCMH1
131	REACTOME_FLT3_SIGNALING	0.00215054	0.0141606	0.57152	2.00995	0	32	UBC,FOXO3,CDKN1B,GAB2,AKT2,GRB2,GRB10,PTPRJ,CSK,AKT1,CBL,KRAS,HRAS,STAT5B,BCL2L11,STAT5A,AKT3
132	REACTOME_CONSTITUTIVE_SIGNALING_BY_AKT1_E17K_IN_CANCER	0.00208768	0.0141606	0.601739	2.00855	0	26	NR4A1,FOXO3,CDKN1B,CDKN1A,AKT2,AKT1,MAPKAP1,GSK3B,GSK3A,PDPK1,FOXO1,AKT3,RPS6KB2,MLST8,MTOR,FOXO6,CASP9,RICTOR
133	REACTOME_RHOG_GTPASE_CYCLE	0.00229358	0.0141606	0.497049	2.00741	0	70	EPHA2,PLEKHG3,ANKLE2,PAK4,CDC42EP1,EMD,RHOG,DOCK1,ARHGEF16,ITGB1,ARHGAP1,ARHGEF5,ARHGDIA,PGRMC2,RAB7A,LMAN1,DSG2,LETM1,CYFIP1,VAV1,PAK2,ARHGAP21,MAP3K11,HSPE1,ESYT1,VAV2,ARHGAP35,ITSN1,TRIO,IQGAP2,MPP7,VAMP3,ARHGAP5
134	REACTOME_N_GLYCAN_ANTENNAE_ELONGATION_IN_THE_MEDIAL_TRANS_GOLGI	0.00212766	0.0141606	0.642279	2.00675	0	19	MGAT4B,FUT3,B4GALT5,FUCA1,B4GALT3,B4GALT2,ST6GAL1,B4GALT1,MGAT5,B4GALT4,MAN2A1,ST3GAL4,ST8SIA6,MGAT3
135	REACTOME_SIGNAL_AMPLIFICATION	0.00215054	0.0141606	0.634218	2.00589	0	20	GNB2,GNB1,GNA13,GNA15,SRC,GNAI2,GNAI1,GNG5,MAPK14,GNG4,GNA11,GNAI3
136	REACTOME_MAPK_TARGETS_NUCLEAR_EVENTS_MEDIATED_BY_MAP_KINASES	0.00217865	0.0141606	0.574084	2.00406	0	31	DUSP7,JUN,MAPK3,PPP2CB,FOS,MAPKAPK2,RPS6KA1,PPP2R1A,MAPK9,PPP2CA,ELK1,RPS6KA2,MAPK14,MEF2A,PPP2R5D,DUSP6
137	REACTOME_ION_HOMEOSTASIS	0.00217865	0.0141606	0.573545	2.00217	0	31	ATP1B1,AHCYL1,ATP2A2,ITPR3,ATP2B4,ATP1A1,STIM1,PRKACA,ASPH,RYR1,ORAI1,FKBP1B,CAMK2D,CAMK2G,FXYD3,ATP2A3
138	REACTOME_ROS_AND_RNS_PRODUCTION_IN_PHAGOCYTES	0.00208768	0.0141606	0.599074	1.99965	0	26	NCF1,ATP6V0B,RAC2,ATP6V0D1,ATP6V1A,ATP6V1H,TCIRG1,ATP6V1F,ATP6V0A1,ATP6V1C2,ATP6V0E2
139	REACTOME_PLASMA_LIPOPROTEIN_CLEARANCE	0.00205761	0.0141606	0.590304	1.99665	0	27	NPC1,LDLR,LDLRAP1,PCSK9,SCARB1,CLTA,AP2A1,AMN,AP2A2,AP2S1,CLTC,VLDLR,HDLBP,LSR,NR1H2,AP2B1
140	REACTOME_KILLING_MECHANISMS	0.00218341	0.0141606	0.762901	1.99609	0	11	JUN,DVL1,DVL2,RAC1,DVL3
141	REACTOME_METABOLISM_OF_STEROIDS	0.00240964	0.0141606	0.441646	1.99406	0	128	INSIG1,SREBF1,HSD11B2,SQLE,OSBPL2,MSMO1,FASN,SEC24A,SCD,SP1,DHCR7,MVD,UBE2I,HMGCS1,IDI1,SREBF2,SEC24D,STARD4,ABCC3,HSD17B7,EBP,FDPS,SEC23A,ACACA,OSBP,HSD17B12,FDFT1,HSD11B1,PPARA,SC5D,KPNB1,SEC24C,STARD3,NCOA6,AKR1C1,CYP51A1,LGMN,RXRA,CARM1,ACAT2,AKR1C2,T
142	REACTOME_PLATELET_HOMEOSTASIS	0.00228311	0.0141606	0.514666	1.99132	0	54	PPP2R5A,GNAS,GNB2,ATP2A2,PPP2CB,GNB1,ITPR3,ATP2B4,PPP2R1A,STIM1,PDE9A,PPP2CA,ORAI1,GNG5,LRP8,GUCY1B1,PPP2R5B,MAPK14,GNG4,PPP2R5D,KCNMA1,PTPN6,PPP2R5E,GNB5,ATP2A3,PLA2G4A,PTPN11,PPP2R5C,NOS3,P2RX4,ITPR2,ORAI2,TRPC6
143	REACTOME_RHO_GTPASES_ACTIVATE_RHOTEKIN_AND_RHOPHILINS	0.00434783	0.0214408	0.861607	1.991	1	7	RHPN2,RHOB,RHOC,RHOA
144	REACTOME_NRAGE_SIGNALS_DEATH_THROUGH_JNK	0.00232019	0.0141606	0.516246	1.98886	0	55	ARHGEF3,AKAP13,FGD4,ARHGEF10L,GNA13,TIAM1,RAC1,NGFR,ARHGEF16,ARHGEF2,ARHGEF5,PLEKHG5,ARHGEF18,ARHGEF12,VAV1,AATF,NGEF,ARHGEF1,ABR,VAV2,BCL2L11,ARHGEF4,ARHGEF7,ITSN1,TRIO,FGD1
145	REACTOME_THE_ROLE_OF_NEF_IN_HIV_1_REPLICATION_AND_DISEASE_PATHOGENESIS	0.00215983	0.0141606	0.614553	1.98757	0	22	HLA-A,ARF1,ATP6V1H,RAC1,AP2A1,AP2A2,AP2S1,PAK2,AP1B1,PACS1,AP1M1,AP2B1
146	REACTOME_INTRACELLULAR_SIGNALING_BY_SECOND_MESSENGERS	0.00242718	0.0141606	0.401959	1.98756	0	266	HDAC5,RCOR1,RRAGD,UBC,EREG,PPP2R5A,HBEGF,NR4A1,FOXO3,JUN,MKRN1,PIP5K1B,IER3,IRS2,GRK2,RHEB,AHCYL1,CSNK2A2,MAPK3,CSNK2A1,CDKN1B,GAB2,PIP5K1A,PPP2CB,PPARG,GATAD2B,RRAGC,ITPR3,RAC2,SRC,RHOG,STRN,EGF,CDKN1A,PPP2R1A,PHC2,RAC1,PSME4,AKT2,IRAK1,PRKACA,PIK3CD,PPP
147	REACTOME_WNT5A_DEPENDENT_INTERNALIZATION_OF_FZD4	0.00217391	0.0141606	0.703604	1.98567	0	14	DVL2,CLTA,AP2A1,AP2A2,AP2S1,CLTC,PRKCA,CLTB,ARRB2,AP2B1,AP2M1
148	REACTOME_CYCLIN_D_ASSOCIATED_EVENTS_IN_G1	0.00225225	0.0141606	0.518262	1.98557	0	47	CDKN1C,UBC,PPP2R2A,LYN,CDKN1B,CDKN2D,PPP2CB,SRC,CDKN1A,PTK6,PPP2R1A,CCND2,PPP2CA
149	REACTOME_RHO_GTPASES_ACTIVATE_CIT	0.00210526	0.0141606	0.646104	1.98545	0	18	CDKN1B,RHOB,RHOC,RAC1,MYH14,RHOA,MYH9,MYH10,PPP1CB,MYL9,DLG4,PPP1R12A
150	REACTOME_INTEGRIN_SIGNALING	0.00218818	0.0141606	0.621851	1.98379	0	21	SHC1,SRC,PTPN1,BCAR1,GRB2,CSK,AKT1,CRK,TLN1,PDPK1,RAP1A,RAP1B,PTK2
151	REACTOME_PHOSPHOLIPID_METABOLISM	0.00246305	0.0141606	0.421106	1.98352	0	182	MBOAT2,LPCAT4,PI4K2A,PIP5K1B,ABHD3,AGPAT2,LPIN1,RAB14,ETNK2,CSNK2A2,CSNK2A1,PIP5K1A,ABHD4,DGAT1,GPCPD1,MIGA2,PIP4P1,GPAT3,OSBPL10,SBF2,SLC44A2,ARF1,PLA2G3,PNPLA2,CDIPT,MFSD2A,RAB5A,PIK3CD,PITPNM1,CDS1,PNPLA3,OCRL,ARF3,PLAAT3,PLD3,ACHE,PLEKHA2,CHKA,MBOAT7,
152	REACTOME_VASOPRESSIN_REGULATES_RENAL_WATER_HOMEOSTASIS_VIA_AQUAPORINS	0.00209644	0.0141606	0.581487	1.98196	0	28	GNAS,GNB2,AQP3,GNB1,AQP4,PRKACA,ADCY7,GNG5,MYO5B,GNG4,ADCY9
153	REACTOME_DEVELOPMENTAL_BIOLOGY	0.00255755	0.0144063	0.364463	1.98136	0	777	GRB7,SREBF1,HES1,UBC,CEBPB,EPHA2,SMAD3,PRSS8,RARG,FOXO3,JUN,STX1A,SHC1,ACTG1,IRS2,TGM5,IL6R,PABPC1,RAP1GAP,SIAH2,NCK2,NAB2,SEMA7A,SPAG9,WASL,EFNB1,TGFB1,LYN,ARTN,CBFB,DRAP1,MSN,CASC3,CSNK2A2,JUP,MAPK3,VASP,RNPS1,RRAS,KRT8,CSNK2A1,GAB2,RELA,PAK4,LAMC1,PPL,
154	REACTOME_DOWNSTREAM_SIGNAL_TRANSDUCTION	0.00205761	0.0141606	0.585441	1.98021	0	27	GRB7,NCK2,CRKL,SRC,BCAR1,RASA1,RAPGEF1,GRB2,CRK,KRAS,HRAS,STAT5B,STAT3,PIK3CB,STAT5A,PDGFB,PDGFA,PIK3CA,PTPN11
155	REACTOME_PLATELET_AGGREGATION_PLUG_FORMATION	0.0021645	0.0141606	0.607499	1.97918	0	23	SHC1,SRC,PTPN1,BCAR1,GRB2,CSK,AKT1,CRK,TLN1,PDPK1,RAP1A,RAP1B,COL1A1,PTK2
156	REACTOME_SIGNALING_BY_BRAF_AND_RAF1_FUSIONS	0.00235849	0.0141606	0.513558	1.97703	0	57	ACTG1,MARK3,MAPK3,LMNA,SND1,MAP2K2,SRC,ARAF,ESRP1,ACTB,CSK,QKI,FAM131B,MPRIP,KDM7A,RAF1,MAP2K1,AGTRAP,KRAS,HRAS,AP3B1,TLN1,VCL,BCL2L11,ARRB2,RAP1A,CLCN6,CAMK2D,RAP1B,FXR1,CAMK2G
157	REACTOME_ENDOSOMAL_VACUOLAR_PATHWAY	0.0021692	0.0141606	0.778402	1.97666	0	10	HLA-A,HLA-E,HLA-C,HLA-B,HLA-F,CTSL
158	REACTOME_SIGNALING_BY_ERYTHROPOIETIN	0.00215983	0.0141606	0.610903	1.97577	0	22	SHC1,IRS2,LYN,CRKL,PIK3CD,PLCG2,RAPGEF1,GRB2,VAV1,GAB1,KRAS,HRAS,STAT5B,PIK3CB
159	REACTOME_LAMININ_INTERACTIONS	0.00214133	0.0141606	0.576425	1.97399	0	29	LAMC1,ITGA3,LAMC2,ITGB1,NID1,LAMB3,LAMB1,ITGA6,ITGB4,LAMA3,COL4A2,COL18A1,COL4A5,HSPG2,LAMB2,COL4A6
160	REACTOME_RESPONSE_OF_EIF2AK1_HRI_TO_HEME_DEFICIENCY	0.00217865	0.0141606	0.679781	1.96955	0	15	PPP1R15A,CEBPB,DDIT3,ATF3,TRIB3,GRB10,EIF2S3
161	REACTOME_G_BETA_GAMMA_SIGNALLING_THROUGH_PI3KGAMMA	0.00218341	0.0141606	0.733101	1.96937	0	12	GNB2,GNB1,AKT2,RHOA,AKT1,GNG5,GNG4,PDPK1,AKT3,GNB5
162	REACTOME_LISTERIA_MONOCYTOGENES_ENTRY_INTO_HOST_CELLS	0.00212766	0.0141606	0.630147	1.96884	0	19	UBC,SRC,SH3GL1,CTNND1,SH3KBP1,GRB2,CBL,CTNNB1,CDH1,STAM,MET
163	REACTOME_RHOJ_GTPASE_CYCLE	0.00232019	0.0141606	0.512901	1.9655	0	51	WASL,JUP,PAK4,CDC42EP1,WIPF2,ARHGAP1,SLC1A5,SLC4A7,OCRL,RAB7A,CDC42BPB,PAK2,ARHGAP21,FNBP1,GJA1,ARHGAP35,GIT1,ARHGEF7,TRIO,SCRIB,MPP7,VAMP3,ARHGAP5,LAMTOR1,ARHGAP32,PAK1,FMNL3,PREX1,WWP2,STOM,ARHGAP26,OPHN1,SNAP23,TMPO
164	REACTOME_CELL_DEATH_SIGNALLING_VIA_NRAGE_NRIF_AND_NADE	0.00228311	0.0141606	0.484114	1.96243	0	72	SQSTM1,UBC,ARHGEF3,AKAP13,FGD4,ARHGEF10L,GNA13,TIAM1,APH1A,RAC1,NGFR,ARHGEF16,ARHGEF2,ARHGEF5,PLEKHG5,ARHGEF18,ARHGEF12,VAV1,AATF,NGEF,ARHGEF1,ABR,VAV2,BCL2L11,ARHGEF4,ARHGEF7,ITSN1,TRIO,FGD1,CASP2,ARHGEF35,ARHGEF40,BEX3,NCSTN,PREX1
165	REACTOME_NEUREXINS_AND_NEUROLIGINS	0.00222222	0.0141606	0.550065	1.95984	0	36	STX1A,EPB41,STXBP1,PDLIM5,DLGAP4,SYT7,SIPA1L1,EPB41L1,HOMER1,HOMER2,APBA3,HOMER3
166	REACTOME_FCERI_MEDIATED_MAPK_ACTIVATION	0.00208768	0.0141606	0.585623	1.95475	0	26	JUN,SHC1,LYN,MAPK3,FOS,MAPK9,RAC1,PLCG2,GRB2,VAV1,PAK2,KRAS,HRAS,VAV2,MAP2K7
167	REACTOME_TOLL_LIKE_RECEPTOR_TLR1_TLR2_CASCADE	0.00228833	0.0141606	0.454249	1.953	0	94	UBC,DUSP7,JUN,PELI1,TNIP2,MAPK3,RELA,ECSIT,PPP2CB,MAP2K3,FOS,IRAK2,MAPKAPK2,RPS6KA1,PPP2R1A,MAPK9,TAB2,IRAK1,APP,PELI2,PPP2CA,ELK1,NFKBIA,NFKB2,RIPK2,MAP3K8,MAP2K1,FBXW11,SOCS1,RPS6KA2,MAPK14,MAP2K7,MEF2A,NFKBIB,PPP2R5D,NFKB1,NKIRAS2,DUSP6,S100A9
168	REACTOME_PREVENTION_OF_PHAGOSOMAL_LYSOSOMAL_FUSION	0.00421941	0.0214408	0.783503	1.95187	1	9	UBC,CORO1A,RAB5A,RAB7A
169	REACTOME_RHOB_GTPASE_CYCLE	0.0022779	0.0141606	0.492714	1.95142	0	64	PKN1,ARHGEF3,TJP2,AKAP13,RHPN2,JUP,ARHGEF10L,RHOB,DIAPH1,BCR,ARHGEF2,ARHGAP1,ARHGEF5,MYO9B,ARHGEF12,FLOT1,ARHGAP21,ARHGEF1,ABR,CAVIN1,VAV2,ARHGAP35,VAMP3,SOWAHC,ARHGAP5,ARHGAP32,PREX1,NET1,ROCK1,DLC1,STOM,SLK,ARHGAP26,STK10
170	REACTOME_DISASSEMBLY_OF_THE_DESTRUCTION_COMPLEX_AND_RECRUITMENT_OF_AXIN_TO_THE_MEMBRANE	0.00208768	0.0141606	0.584191	1.94997	0	26	PPP2R5A,DVL1,AXIN1,PPP2CB,DVL2,FZD5,PPP2R1A,DVL3,PPP2CA,GSK3B,CSNK1G2,LRP5,CSNK1A1,PPP2R5B,FRAT2,PPP2R5D,CTNNB1,FZD1
171	REACTOME_CONSTITUTIVE_SIGNALING_BY_OVEREXPRESSED_ERBB2	0.00218341	0.0141606	0.744783	1.94868	0	11	PTPN12,SHC1,GRB2,ERBB2,KRAS,HRAS,CDC37
172	REACTOME_WNT5A_DEPENDENT_INTERNALIZATION_OF_FZD2_FZD5_AND_ROR2	0.00218341	0.0141606	0.743529	1.9454	0	11	FZD5,CLTA,AP2A1,AP2A2,AP2S1,CLTC,CLTB,ROR2,AP2B1,AP2M1
173	REACTOME_RET_SIGNALING	0.00214592	0.0141606	0.560643	1.94493	0	30	GRB7,SHC1,IRS2,RAP1GAP,ARTN,GAB2,SRC,PRKACA,PIK3CD,GRB2,GRB10,PRKCA,GAB1,NRTN,PIK3CB,PDLIM7,DOK4
174	REACTOME_NEGATIVE_REGULATION_OF_THE_PI3K_AKT_NETWORK	0.00224215	0.0141606	0.460297	1.94463	0	84	EREG,PPP2R5A,HBEGF,PIP5K1B,IER3,IRS2,MAPK3,GAB2,PIP5K1A,PPP2CB,RAC2,SRC,RHOG,STRN,EGF,PPP2R1A,RAC1,AKT2,IRAK1,PIK3CD,PPP2CA,AREG,GRB2,TRIB3,TGFA,AKT1,VAV1,GAB1,ERBB2,PHLPP1,INSR,NRG2,PPP2R5B,PIK3CB,PPP2R5D,PTEN,AKT3,PIP4K2C,MET,PDGFB,PIP5K1C,ERBB3,IL1RL1,
175	REACTOME_ERK_MAPK_TARGETS	0.00215983	0.0141606	0.600753	1.94294	0	22	DUSP7,MAPK3,PPP2CB,RPS6KA1,PPP2R1A,PPP2CA,ELK1,RPS6KA2,MAPK14,MEF2A,PPP2R5D,DUSP6,MAPK1,RPS6KA5,DUSP3,DUSP4
176	REACTOME_VLDLR_INTERNALISATION_AND_DEGRADATION	0.00436681	0.0214408	0.723073	1.94243	1	12	PCSK9,CLTA,AP2A1,AP2A2,AP2S1,CLTC,VLDLR,NR1H2,AP2B1,AP2M1
177	REACTOME_AQUAPORIN_MEDIATED_TRANSPORT	0.00219298	0.0141606	0.548469	1.94005	0	33	GNAS,GNB2,AQP3,GNB1,AQP4,AQP5,PRKACA,ADCY7,GNG5,MYO5B,GNG4,ADCY9
178	REACTOME_NUCLEAR_RECEPTOR_TRANSCRIPTION_PATHWAY	0.00222222	0.0141606	0.518934	1.9329	0	43	NR1D1,NR4A1,PPARD,RARG,ESRRA,PPARG,THRA,PPARA,RARA,NR2F6,RXRA,NR3C2,NRBF2,THRB,NCOR2,NCOR1,NR1H2
179	REACTOME_SPHINGOLIPID_METABOLISM	0.00225225	0.0141606	0.46071	1.93211	0	81	FA2H,SGPP2,GM2A,PRKD2,HEXB,KDSR,SPNS2,NEU1,CERT1,SPHK1,ALDH3B2,OSBP,UGCG,ARSI,SUMF2,GLTP,CTSA,SAMD8,CERS5,CSNK1G2,DEGS2,PSAP,ESYT1,SGPP1,CERS2,PLPP2,SGPL1,ARSA,VAPA,ORMDL3,SMPD1,ARSK
180	REACTOME_SEMA4D_INDUCED_CELL_MIGRATION_AND_GROWTH_CONE_COLLAPSE	0.00215054	0.0141606	0.610217	1.92998	0	20	RHOB,RND1,RHOC,MYH14,LIMK1,RHOA,ARHGEF12,ERBB2,MYH9,MYH10,SEMA4D
181	REACTOME_DCC_MEDIATED_ATTRACTIVE_SIGNALING	0.00428265	0.0214408	0.693594	1.9287	1	13	WASL,SRC,NTN1,DOCK1,RAC1,ABLIM3,TRIO,PTK2,ABLIM1,ABLIM2
182	REACTOME_NERVOUS_SYSTEM_DEVELOPMENT	0.00246305	0.0141606	0.364959	1.92489	0	480	GRB7,UBC,EPHA2,SHC1,ACTG1,IRS2,PABPC1,RAP1GAP,SIAH2,NCK2,NAB2,SEMA7A,WASL,EFNB1,LYN,ARTN,MSN,CASC3,CSNK2A2,MAPK3,VASP,RNPS1,RRAS,CSNK2A1,GAB2,PAK4,LAMC1,RPS2,SMARCA4,RHOB,PTPRA,SREBF2,MAP2K2,RND1,SPTBN1,UNC5B,SRC,RANBP9,RPS6KA1,TIAM1,EPHB3,MAPK13,RHOC,APH
183	REACTOME_LDL_CLEARANCE	0.00210526	0.0141606	0.626285	1.92454	0	18	NPC1,LDLR,LDLRAP1,PCSK9,CLTA,AP2A1,AP2A2,AP2S1,CLTC
184	REACTOME_RECEPTOR_MEDIATED_MITOPHAGY	0.00218341	0.0141606	0.735532	1.92448	0	11	CSNK2A2,CSNK2A1,SRC,MAP1LC3B,MAP1LC3A,PGAM5
185	REACTOME_TRANSCRIPTIONAL_REGULATION_BY_THE_AP_2_TFAP2_FAMILY_OF_TRANSCRIPTION_FACTORS	0.00214133	0.0141606	0.561795	1.92389	0	29	VEGFA,UBE2I,CDKN1A,YY1,TFAP2A,TGFA,CITED4,KDM5B,ERBB2,SUMO1,MYC,TFAP2C
186	REACTOME_SIGNAL_ATTENUATION	0.00421941	0.0214408	0.772092	1.92345	1	9	SHC1,IRS2,MAPK3,GRB2,GRB10,INSR
187	REACTOME_EXTRACELLULAR_MATRIX_ORGANIZATION	0.00243309	0.0141606	0.399135	1.92262	0	210	CEACAM1,MMP14,CRTAP,SDC4,CAPN14,ADAM8,TGFB1,SDC1,F11R,CTSD,LAMC1,ITGA3,SERPINH1,CAPN2,BMP2,ITGB5,CAPN1,ITGA5,MMP1,LAMC2,ITGB7,APP,COL17A1,ITGB1,SERPINE1,ADAM17,NID1,COLGALT1,LTBP4,PCOLCE2,BSG,DDR1,CAPNS1,LAMB3,P4HB,SH3PXD2A,PRKCA,LAMB1,BMP1,FBLN1,ACTN1,LT
188	REACTOME_PTK6_REGULATES_RTKS_AND_THEIR_EFFECTORS_AKT1_AND_DOK1	0.00421941	0.0214408	0.771439	1.92182	1	9	UBC,PTK6,AKT1,ARAP1,CBL
189	REACTOME_DOWNREGULATION_OF_SMAD2_3_SMAD4_TRANSCRIPTIONAL_ACTIVITY	0.00411523	0.0214408	0.567875	1.92079	1	27	UBC,SMAD3,SERPINE1,TGIF1,PPM1A,NEDD4L,NCOR2,NCOR1,SMAD7,SMAD2,RNF111,UBE2D3,USP9X,SKI,HDAC1,RPS27A,UBB,WWTR1
190	REACTOME_P75NTR_RECRUITS_SIGNALLING_COMPLEXES	0.00436681	0.0214408	0.713543	1.91683	1	12	SQSTM1,UBC,NGFR,IRAK1,RIPK2,PRKCI
191	REACTOME_AKT_PHOSPHORYLATES_TARGETS_IN_THE_CYTOSOL	0.00434783	0.0214408	0.678906	1.91597	1	14	MKRN1,CDKN1B,CDKN1A,AKT2,AKT1,GSK3B,GSK3A,AKT3
192	REACTOME_DEATH_RECEPTOR_SIGNALLING	0.00240964	0.0141606	0.420179	1.91356	0	132	SQSTM1,UBC,ARHGEF3,AKAP13,RTN4R,RELA,FGD4,ARHGEF10L,RTN4,GNA13,TNFRSF1A,OTUD7B,TIAM1,APH1A,TAB2,RAC1,NGFR,IRAK1,ARHGEF16,ARHGEF2,ARHGEF5,ADAM17,ARHGDIA,TNFRSF10B,CFLAR,PLEKHG5,RBCK1,TNFRSF10A,OTULIN,RHOA,NFKBIA,ARHGEF18,ARHGEF12,VAV1,RIPK2,AATF,NGEF,ARHGE
193	REACTOME_MET_ACTIVATES_RAS_SIGNALING	0.0021692	0.0141606	0.752072	1.9098	0	10	SHC1,RANBP9,GRB2,KRAS,HRAS,MUC20,MET
194	REACTOME_METABOLISM_OF_CARBOHYDRATES	0.00241546	0.0141606	0.388542	1.90836	0	247	TKT,UBC,PFKFB2,SDC4,CHP1,HK2,SLC2A1,HK1,SDC1,ST3GAL1,HS3ST1,PGD,PFKP,PPP2CB,PC,FUT3,B4GALT5,HEXB,GALE,G6PD,GUSB,PPP2R1A,PHKA1,GPI,MDH2,B4GALT3,HAS3,SEC13,GOT1,PGM1,PRKACA,SLC25A1,ENO2,SLC9A1,PPP2CA,GOT2,PFKM,SLC25A11,GPC4,HPSE,DCXR,XYLT1,MAN2B1,EXT1,B3GNT
195	REACTOME_NR1H2_AND_NR1H3_MEDIATED_SIGNALING	0.00215517	0.0141606	0.529333	1.90832	0	37	SREBF1,FASN,SCD,ARL4C,EEPD1,ABCG1,RXRA,PLTP,TBL1X,KDM1B,NCOR2,NCOR1,NR1H2,AGO2
196	REACTOME_SIGNALING_BY_FGFR3	0.00217865	0.0141606	0.545868	1.90556	0	31	UBC,GALNT3,SHC1,MAPK3,PPP2CB,SRC,PPP2R1A,PPP2CA,GRB2,GAB1,CBL,KRAS,HRAS
197	REACTOME_INTERLEUKIN_17_SIGNALING	0.00227273	0.0141606	0.473038	1.90312	0	68	UBC,DUSP7,JUN,TNIP2,MAPK3,PPP2CB,MAP2K3,FOS,IRAK2,MAPKAPK2,RPS6KA1,PPP2R1A,MAPK9,TAB2,IRAK1,PPP2CA,ELK1,RIPK2,MAP3K8,MAP2K1,FBXW11,RPS6KA2,MAPK14,MAP2K7,MEF2A,PPP2R5D,NFKB1
198	REACTOME_SIGNALING_BY_EGFR_IN_CANCER	0.00214133	0.0141606	0.57699	1.90269	0	25	UBC,EREG,HBEGF,SHC1,EGF,AREG,GRB2,TGFA,GAB1,CBL,KRAS,HRAS,CDC37
199	REACTOME_REGULATION_OF_LOCALIZATION_OF_FOXO_TRANSCRIPTION_FACTORS	0.00655022	0.0271864	0.707907	1.90169	2	12	FOXO3,AKT2,SFN,YWHAZ,AKT1,YWHAG,FOXO1,AKT3,YWHAQ,FOXO6,YWHAB
200	REACTOME_ANTIGEN_ACTIVATES_B_CELL_RECEPTOR_BCR_LEADING_TO_GENERATION_OF_SECOND_MESSENGERS	0.00215054	0.0141606	0.58185	1.90089	0	24	LYN,AHCYL1,ITPR3,STIM1,PIK3CD,PLCG2,SH3KBP1,GRB2,VAV1,ORAI1
201	REACTOME_ANTI_INFLAMMATORY_RESPONSE_FAVOURING_LEISHMANIA_PARASITE_INFECTION	0.00223214	0.0141606	0.466533	1.89867	0	73	ADM,GNAS,LYN,GNB2,AHCYL1,GNB1,ITPR3,SRC,GNAI2,HTR7,PRKACA,ADAM17,PLCG2,RHBDF2,YES1,GNAI1,ADCY7,GNG5,ADRB1,ADORA2B,MAPK14,MYH9,GNG4,ADCY9,FURIN,GNAI3
202	REACTOME_RHO_GTPASES_ACTIVATE_PAKS	0.00215054	0.0141606	0.600159	1.89817	0	20	FLNA,RAC1,MYH14,LIMK1,PAK2,NF2,MYH9,MYH10,CTTN,PPP1CB,PAK1,MYL9,PPP1R12A
203	REACTOME_GLUCAGON_SIGNALING_IN_METABOLIC_REGULATION	0.00215054	0.0141606	0.600054	1.89784	0	20	GNAS,GNB2,GNB1,PRKACA,ADCY7,GNG5,GNG4,ADCY9
204	REACTOME_FOXO_MEDIATED_TRANSCRIPTION_OF_CELL_DEATH_GENES	0.00653595	0.0271864	0.654072	1.89506	2	15	BBC3,FOXO3,DDIT3,STK11,BCL6,BCL2L11,PINK1,FOXO1
205	REACTOME_STAT5_ACTIVATION_DOWNSTREAM_OF_FLT3_ITD_MUTANTS	0.00867679	0.0330226	0.785598	1.89383	3	8	PIM1,GAB2,BCL2L1,CDKN1A,GRB2,STAT5B,STAT5A
206	REACTOME_LINOLEIC_ACID_LA_METABOLISM	0.00649351	0.0271864	0.867616	1.89281	2	6	FADS1,ELOVL5,FADS2,ACSL1,ELOVL1
207	REACTOME_SIGNALING_BY_RHO_GTPASES_MIRO_GTPASES_AND_RHOBTB3	0.00248756	0.0141606	0.352145	1.89268	0	638	GRB7,NDEL1,TRIP10,PPP2R5A,NDE1,RHOV,EPHA2,PLEKHG3,WASF2,CDC42EP5,EFHD2,ACTG1,NCK2,PLEKHG6,NCF1,DVL1,WASL,TAOK3,PKN1,ARHGEF3,TJP2,AKAP13,RHPN2,JUP,MAPK3,NCKAP1,CAPZB,ANKLE2,GFOD1,CDKN1B,ARHGAP17,PAK4,WHAMM,CDC42EP1,RHOT1,FGD4,PPP2CB,DOCK6,ARHGEF10L,EMD,RHO
208	REACTOME_GASTRIN_CREB_SIGNALLING_PATHWAY_VIA_PKC_AND_MAPK	0.0021097	0.0141606	0.638564	1.89063	0	16	HBEGF,MAPK3,RPS6KA1,GRB2,PRKCA,KRAS,HRAS,RPS6KA2
209	REACTOME_NOTCH_HLH_TRANSCRIPTION_PATHWAY	0.00419287	0.0214408	0.554596	1.8903	1	28	HDAC5,NOTCH3,HDAC11,NOTCH2,TBL1X,HDAC6,NCOR2,MAML1,NCOR1,KAT2A,KAT2B,HDAC7
210	REACTOME_ADP_SIGNALLING_THROUGH_P2Y_PURINOCEPTOR_12	0.0043384	0.0214408	0.74339	1.88775	1	10	GNB2,GNB1,GNAI2,GNAI1,GNG5,GNG4,GNAI3,GNB5
211	REACTOME_ADAPTIVE_IMMUNE_SYSTEM	0.00242131	0.0141606	0.351671	1.88665	0	603	UBC,PPP2R5A,SIPA1,MKRN1,UBE2R2,KLHL21,RLIM,BCL10,RAP1GAP,SIAH2,HLA-A,RNF19B,NCF1,SEC24A,LYN,AHCYL1,TRAF7,SMURF1,NFKBIE,FBXL12,HSPA5,CAPZB,VASP,UBE2D2,UBE2M,CTSD,CD81,WWP1,RELA,UBE2G1,NECTIN2,RNF126,PPL,HLA-E,PPP2CB,RNF114,UBE2H,SOCS3,ZNRF1,SEC24D,SPSB1,FB
212	REACTOME_SIGNALING_BY_NUCLEAR_RECEPTORS	0.00238095	0.0141606	0.384373	1.88607	0	235	SREBF1,EREG,HBEGF,HSPB1,JUND,PPARD,RARG,FOXO3,JUN,SHC1,FASN,FKBP4,SCD,SP1,CBFB,GNB2,MAPK3,ZNF217,AXIN1,CDKN1B,CTSD,RDH10,CRABP2,RAD21,FKBP5,GNB1,TLE3,FOS,SRC,ARL4C,GNAI2,ZDHHC7,STRN,EGF,USF2,NCOA3,YY1,DHRS3,AKT2,SPHK1,FOSB,H2BC21,AREG,EEPD1,ELK1,GTF2F1,CX
213	REACTOME_ACTIVATION_OF_RAC1	0.00655022	0.0271864	0.720806	1.88595	2	11	NCK2,PAK4,RAC1,PAK6,PAK2
214	REACTOME_HEPARAN_SULFATE_HEPARIN_HS_GAG_METABOLISM	0.0043956	0.0214408	0.518725	1.88468	1	40	SDC4,SDC1,HS3ST1,GUSB,GPC4,HPSE,XYLT1,EXT1,SLC35D2,NAGLU,HS3ST6,SDC2,B3GAT3,CSPG4,XYLT2,B4GALT7,HSPG2,B3GAT2,AGRN,GPC1
215	REACTOME_SIGNALING_BY_GPCR	0.00229885	0.0141606	0.368359	1.88451	0	345	HBEGF,ADM,GNAS,RGS12,ARHGEF3,GRK2,WNT7B,AKAP13,GNB2,AHCYL1,MAPK3,WNT7A,P2RY2,PTAFR,FGD4,PPP2CB,ARHGEF10L,PPP3CC,RHOB,GNB1,ITPR3,GNA13,GNA15,FZD5,SRC,GNAI2,RGS10,ABHD12,RPS6KA1,TIAM1,PPP2R1A,GRK6,RHOC,C5AR2,HTR7,RGS14,AKT2,LPAR5,APP,DGKA,ARHGEF16,ARHGEF2,P
216	REACTOME_SEMAPHORIN_INTERACTIONS	0.002331	0.0141606	0.485158	1.88239	0	58	SEMA7A,RRAS,RHOB,RND1,RHOC,RAC1,ITGB1,MYH14,LIMK1,RHOA,ARHGEF12,GSK3B,PAK2,PLXND1,ERBB2,CFL1,TLN1,MYH9,MYH10,ARHGAP35,SEMA4A,SEMA4D,MET,PIP5K1C,HSP90AB1,PAK1,PLXNA2,MYL9,ROCK1,CDK5R1,PLXNA1
217	REACTOME_SPHINGOLIPID_DE_NOVO_BIOSYNTHESIS	0.00222222	0.0141606	0.505333	1.88223	0	43	FA2H,SGPP2,PRKD2,KDSR,SPNS2,CERT1,SPHK1,ALDH3B2,OSBP,SAMD8,CERS5,CSNK1G2,DEGS2,SGPP1,CERS2,PLPP2,SGPL1,VAPA,ORMDL3
218	REACTOME_GLYCOSAMINOGLYCAN_METABOLISM	0.00229885	0.0141606	0.433354	1.88117	0	99	SDC4,CHP1,SDC1,ST3GAL1,HS3ST1,B4GALT5,HEXB,GUSB,B4GALT3,HAS3,SLC9A1,GPC4,HPSE,XYLT1,EXT1,B3GNT3,UST,CHST6,SLC35D2,NAGLU,B4GALT2,HS3ST6,SDC2,HYAL2,CD44,B3GAT3,B4GALT1,B3GNT7,HYAL1,CSGALNACT2,CHPF,CEMIP,CSPG4,B4GALT4,XYLT2,GNS,SLC35B2,CHST11,B4GALT7,HSPG2,S
219	REACTOME_EFFECTS_OF_PIP2_HYDROLYSIS	0.00437637	0.0214408	0.589201	1.87963	1	21	ITPR3,ABHD12,DGKA,PRKCD,DGKE,DGKZ,DGKH,PRKCH,MGLL,ITPR2,TRPC6
220	REACTOME_MET_ACTIVATES_RAP1_AND_RAC1	0.0043384	0.0214408	0.73964	1.87823	1	10	CRKL,RAC1,RAPGEF1,GRB2,CRK,GAB1,RAP1A,RAP1B,MET
221	REACTOME_TRANS_GOLGI_NETWORK_VESICLE_BUDDING	0.00232558	0.0141606	0.466596	1.8767	0	69	FTL,FTH1,ACBD3,PICALM,ARF1,CLINT1,GAK,APP,CLTA,RAB5C,CLTC,OCRL,SNX9,DNM2,AP1B1,SH3D19,STX4,NAPA,TPD52,AP3S1,AP3B1,IGF2R,GBF1,CLTB,SORT1,CPD,TPD52L1,CTSZ,GNS,AP1M1,HIP1R,PUM1,DNASE2,BLOC1S3,BLOC1S4,DNAJC6
222	REACTOME_EGFR_TRANSACTIVATION_BY_GASTRIN	0.00632911	0.0271864	0.751641	1.8725	2	9	HBEGF,GRB2,PRKCA,KRAS,HRAS
223	REACTOME_MATURATION_OF_SARS_COV_2_SPIKE_PROTEIN	0.00208768	0.0141606	0.560891	1.8722	0	26	ST3GAL1,MGAT4B,PRKCSH,ST6GALNAC2,MGAT1,ST6GALNAC4,ST6GAL1,MGAT5,MOGS,GANAB,MAN2A1,ST3GAL4,RPN1,DDOST
224	REACTOME_INTERLEUKIN_1_PROCESSING	0.00867679	0.0330226	0.77585	1.87033	3	8	RELA,IL1B,NFKB2,IL1A,IL18,NFKB1
225	REACTOME_NEGATIVE_REGULATION_OF_FGFR3_SIGNALING	0.00215054	0.0141606	0.591123	1.86959	0	20	UBC,MAPK3,PPP2CB,SRC,PPP2R1A,PPP2CA,GRB2,CBL,MAPK1,BRAF,SPRY2,PTPN11
226	REACTOME_INTERLEUKIN_15_SIGNALING	0.00655022	0.0271864	0.695827	1.86924	2	12	SHC1,GAB2,GRB2,JAK1,STAT5B,STAT3,IL15RA,STAT5A,IL15,JAK3
227	REACTOME_FATTY_ACYL_COA_BIOSYNTHESIS	0.00428265	0.0214408	0.54567	1.86867	1	29	FASN,TECR,SCD,ELOVL7,ELOVL5,ACACA,HSD17B12,SLC25A1,ACSL3,ACLY,ACSL1,ELOVL1,ACSL4,ELOVL4,SCD5
228	REACTOME_GLUCAGON_TYPE_LIGAND_RECEPTORS	0.00655022	0.0271864	0.713394	1.86656	2	11	GNAS,GNB2,GNB1,GNG5,GNG4,VIPR1,GIPR,GNB5
229	REACTOME_HS_GAG_DEGRADATION	0.00215054	0.0141606	0.590069	1.86626	0	20	SDC4,SDC1,GUSB,GPC4,HPSE,NAGLU,SDC2,HSPG2,AGRN,GPC1,GLB1,SGSH
230	REACTOME_RETROGRADE_NEUROTROPHIN_SIGNALLING	0.00655022	0.0271864	0.710921	1.86009	2	11	CLTA,AP2A1,AP2A2,AP2S1,CLTC,DNM2,AP2B1,AP2M1
231	REACTOME_ACTIVATION_OF_BH3_ONLY_PROTEINS	0.00429184	0.0214408	0.53575	1.85858	1	30	BBC3,PPP3CC,AKT2,TP53BP2,SFN,PPP3R1,PMAIP1,YWHAZ,AKT1,YWHAG,YWHAH,BCL2L11,BCL2,AKT3,YWHAQ
232	REACTOME_TYPE_I_HEMIDESMOSOME_ASSEMBLY	0.00655022	0.0271864	0.710318	1.85851	2	11	LAMC2,COL17A1,LAMB3,ITGA6,ITGB4,LAMA3,PLEC,CD151,KRT5
233	REACTOME_NEGATIVE_REGULATION_OF_FGFR1_SIGNALING	0.00437637	0.0214408	0.582228	1.85738	1	21	UBC,MAPK3,PPP2CB,SRC,PPP2R1A,PPP2CA,GRB2,CBL,MAPK1,BRAF,SPRY2,PTPN11
234	REACTOME_GAP_JUNCTION_DEGRADATION	0.00655022	0.0271864	0.689714	1.85282	2	12	ACTG1,CLTA,ACTB,CLTC,DNM2,GJA1,CLTB,AP2M1,DAB2
235	REACTOME_NEF_MEDIATES_DOWN_MODULATION_OF_CELL_SURFACE_RECEPTORS_BY_RECRUITING_THEM_TO_CLATHRIN_ADAPTERS	0.00212766	0.0141606	0.591934	1.84945	0	19	HLA-A,ARF1,ATP6V1H,AP2A1,AP2A2,AP2S1,AP1B1,PACS1,AP1M1,AP2B1
236	REACTOME_RAS_PROCESSING	0.004329	0.0214408	0.567201	1.84789	1	23	UBC,ABHD17C,BCL2L1,RCE1,ZDHHC9,KRAS,HRAS,ABHD17A,ARL2,ABHD17B
237	REACTOME_AMINO_ACIDS_REGULATE_MTORC1	0.00446429	0.0216625	0.48073	1.84455	1	48	RRAGD,RHEB,ATP6V0B,RRAGC,ATP6V0D1,ATP6V1A,SEC13,ATP6V1H,TCIRG1,FNIP2,LAMTOR5,ATP6V1F,SESN2,NPRL3,ATP6V1C2,FNIP1,ATP6V0E2,LAMTOR1,MLST8,RRAGA,MTOR,SH3BP4,LAMTOR3,RPTOR
238	REACTOME_REGULATION_OF_INSULIN_LIKE_GROWTH_FACTOR_IGF_TRANSPORT_AND_UPTAKE_BY_INSULIN_LIKE_GROWTH_FACTOR_BINDING_PROTEINS_IGFBPS	0.00451467	0.0216713	0.432933	1.83708	1	87	IGFBP6,IGFBP4,PCSK9,LAMC1,TMEM132A,CST3,PRKCSH,SHISA5,GAS6,APLP2,MMP1,NUCB1,PNPLA2,APP,CKAP4,KLK1,IGFBP2,P4HB,LAMB1,PDIA6,QSOX1,HSP90B1,SDC2,MFGE8,TNC,CALU,TIMP1,FUCA2,MBTPS1,MSLN,FSTL3,ANO8,LAMB2,MELTF,MMP2,CCN1,KLK13,LGALS1,FAM20C,WFS1
239	REACTOME_EGR2_AND_SOX10_MEDIATED_INITIATION_OF_SCHWANN_CELL_MYELINATION	0.004329	0.0214408	0.562618	1.83296	1	23	NAB2,LAMC1,SMARCA4,SREBF2,YAP1,LAMB1,CYP51A1,PRX,GJB1,DAG1,SCD5,MBP,HMGCR,HDAC2
240	REACTOME_PI3K_AKT_SIGNALING_IN_CANCER	0.00230947	0.0141606	0.444451	1.83022	0	78	EREG,HBEGF,NR4A1,FOXO3,IRS2,CDKN1B,GAB2,RAC2,SRC,RHOG,STRN,EGF,CDKN1A,RAC1,AKT2,PIK3CD,AREG,GRB2,TGFA,AKT1,MAPKAP1,VAV1,GSK3B,GAB1,ERBB2,NRG2,PIK3CB,GSK3A,PDPK1,FOXO1,PTEN,AKT3,RPS6KB2,MET,PDGFB,ERBB3,CD86,PDGFA,MLST8,PIK3CA,MTOR,FOXO6
241	REACTOME_SHC_RELATED_EVENTS_TRIGGERED_BY_IGF1R	0.0130435	0.044238	0.790861	1.82752	5	7	SHC1,GRB2,KRAS,HRAS,IGF1R
242	REACTOME_NECTIN_NECL_TRANS_HETERODIMERIZATION	0.00865801	0.0330226	0.837168	1.82639	3	6	NECTIN4,NECTIN2,NECTIN1,PVR
243	REACTOME_RHO_GTPASES_ACTIVATE_ROCKS	0.00212766	0.0141606	0.583793	1.82402	0	19	RHOB,RHOC,MYH14,LIMK1,RHOA,CFL1,MYH9,MYH10,PPP1CB,PAK1,MYL9,ROCK1,PPP1R12A
244	REACTOME_MET_ACTIVATES_PTK2_SIGNALING	0.004329	0.0214408	0.559781	1.82371	1	23	LAMC1,ITGA3,SRC,LAMC2,ITGB1,LAMB3,LAMB1,LAMA3,MET,LAMB2,COL1A1,PTK2
245	REACTOME_CYCLIN_A_B1_B2_ASSOCIATED_EVENTS_DURING_G2_M_TRANSITION	0.00428265	0.0214408	0.553014	1.82363	1	25	PPP2R2A,WEE1,PPP2CB,CDC25B,PPP2R1A,PPP2CA,PPME1,CCNA1
246	REACTOME_CD209_DC_SIGN_SIGNALING	0.00421053	0.0214408	0.605467	1.82096	1	17	LYN,RELA,PRKACA,PAK2,RAF1,KRAS,HRAS,RELB,NFKB1,PAK1,RPS6KA5,EP300
247	REACTOME_CLEC7A_DECTIN_1_INDUCES_NFAT_ACTIVATION	0.00655022	0.0271864	0.695682	1.82021	2	11	AHCYL1,ITPR3,PPP3R1,PPP3CB,NFATC1,PPP3CA
248	REACTOME_SIGNALING_BY_INSULIN_RECEPTOR	0.00465116	0.021782	0.472853	1.81809	1	52	SHC1,IRS2,MAPK3,ATP6V0B,GAB2,ATP6V0D1,ATP6AP1,ATP6V1A,ATP6V1H,TCIRG1,AKT2,GRB2,TRIB3,GRB10,GAB1,ATP6V1F,INSR,KRAS,HRAS,ATP6V0A1,PIK3CB,PDPK1
249	REACTOME_TRANSCRIPTIONAL_ACTIVITY_OF_SMAD2_SMAD3_SMAD4_HETEROTRIMER	0.00440529	0.0214408	0.478556	1.81733	1	45	UBC,JUNB,SMAD3,SP1,MAPK3,CCNK,SERPINE1,TGIF1,PPM1A,CDK9,CDK8,CDKN2B,NEDD4L,E2F5,NCOR2,NCOR1,MYC,SMAD7,SMAD2,MAPK1,RNF111,UBE2D3,USP9X,SKI,HDAC1
250	REACTOME_REGULATION_OF_TP53_ACTIVITY_THROUGH_ACETYLATION	0.00643777	0.0271864	0.522822	1.81373	2	30	GATAD2B,PIP4P1,BRD7,AKT2,RBBP7,AKT1,GATAD2A,CHD4,PML,AKT3,PIP4K2C,BRD1,CHD3,BRPF3,TP53,EP300,HDAC2,PIP4K2A,HDAC1,KAT6A,MTA2
251	REACTOME_MET_RECEPTOR_RECYCLING	0.00632911	0.0271864	0.727207	1.81163	2	9	ARF6,CRKL,GRB2,CRK,GAB1,GGA3,RAB4A,MET
252	REACTOME_SIGNALING_BY_LEPTIN	0.00650759	0.0271864	0.712431	1.80914	2	10	LEPR,IRS2,SOCS3,STAT5B,STAT3,STAT5A,PTPN11
253	REACTOME_EGFR_INTERACTS_WITH_PHOSPHOLIPASE_C_GAMMA	0.00632911	0.0271864	0.726073	1.8088	2	9	EREG,HBEGF,EGF,AREG,TGFA
254	REACTOME_G_ALPHA_S_SIGNALLING_EVENTS	0.00229885	0.0141606	0.461731	1.80647	0	59	ADM,GNAS,GRK2,GNB2,GNB1,SRC,GNAI2,GRK6,HTR7,GNAI1,PDE7A,ADCY7,GNG5,ADRB1,ADORA2B,GNG4,ADCY9,PDE4A,ARRB2,GNAI3,PTGER4,VIPR1,ADRB2,PDE8A,GIPR,GRK5,GNB5
255	REACTOME_BH3_ONLY_PROTEINS_ASSOCIATE_WITH_AND_INACTIVATE_ANTI_APOPTOTIC_BCL_2_MEMBERS	0.00632911	0.0271864	0.724902	1.80589	2	9	BBC3,BCL2L1,PMAIP1,STAT3,BCL2L11,BCL2
256	REACTOME_NEGATIVE_REGULATION_OF_FGFR4_SIGNALING	0.00215054	0.0141606	0.570548	1.80452	0	20	UBC,MAPK3,PPP2CB,SRC,PPP2R1A,PPP2CA,GRB2,CBL,MAPK1,BRAF,SPRY2,PTPN11
257	REACTOME_THROMBIN_SIGNALLING_THROUGH_PROTEINASE_ACTIVATED_RECEPTORS_PARS	0.00212766	0.0141606	0.577391	1.80401	0	19	GNB2,MAPK3,GNB1,GNA13,GNA15,SRC,GNG5,GNG4,ARRB2,GNA11,MAPK1,GNB5,GNA12
258	REACTOME_TAK1_ACTIVATES_NFKB_BY_PHOSPHORYLATION_AND_ACTIVATION_OF_IKKS_COMPLEX	0.00653595	0.0271864	0.516669	1.80363	2	31	UBC,RELA,IRAK2,TAB2,IRAK1,APP,NFKBIA,NFKB2,RIPK2,NFKBIB,NFKB1,NKIRAS2,TAB3,NOD1,UBE2V1
259	REACTOME_ACYL_CHAIN_REMODELLING_OF_PC	0.00212766	0.0141606	0.577034	1.8029	0	19	MBOAT2,LPCAT4,PLA2G3,PLAAT3,PNPLA8,PLA2G4E,LPCAT1,PLBD1,PLA2G4A,PLA2G4F,LPCAT3
260	REACTOME_GENE_AND_PROTEIN_EXPRESSION_BY_JAK_STAT_SIGNALING_AFTER_INTERLEUKIN_12_STIMULATION	0.00219298	0.0141606	0.506551	1.80032	0	34	MSN,CNN2,SOD2,ARF1,GSTO1,AIP,PAK2,CFL1,HNRNPDL,LCP1,RALA,TALDO1,PITPNA,RAP1B,ANXA2
261	REACTOME_RUNX3_REGULATES_P14_ARF	0.00650759	0.0271864	0.708692	1.79964	2	10	TGFB1,CBFB,BRD2,KRAS,RUNX3,CCND1,EP300,CDKN2A
262	REACTOME_SIGNALING_BY_WNT_IN_CANCER	0.00643777	0.0271864	0.518658	1.79928	2	30	PPP2R5A,AXIN1,PPP2CB,FZD5,PPP2R1A,KREMEN1,PPP2CA,GSK3B,TNKS2,LRP5,CSNK1A1,PORCN,CTBP2,PPP2R5B,TCF7L2,PPP2R5D,CTNNB1,RNF43,TNKS,CTBP1
263	REACTOME_RHOA_GTPASE_CYCLE	0.00243309	0.0141606	0.395259	1.79837	0	136	PLEKHG3,PLEKHG6,PKN1,ARHGEF3,TJP2,AKAP13,RHPN2,JUP,ARHGEF10L,DIAPH1,FARP1,TIAM1,ATP6AP1,BCR,ARHGEF2,DEF6,ARHGAP1,ARHGEF5,ARHGDIA,ARHGAP8,PLEKHG5,PGRMC2,ARHGAP23,LMAN1,RHOA,MYO9B,ARHGEF18,ARHGEF12,VAV1,FLOT1,C1QBP,ARHGAP21,ARAP1,NGEF,ARHGAP44,ARHGEF1,ARHGA
264	REACTOME_HUR_ELAVL1_BINDS_AND_STABILIZES_MRNA	0.010846	0.0392544	0.745976	1.79832	4	8	ELAVL1,PRKCD,SET,PRKCA,TNFSF13
265	REACTOME_VEGFR2_MEDIATED_VASCULAR_PERMEABILITY	0.00428265	0.0214408	0.544805	1.79656	1	25	JUP,RAC1,AKT2,CTNND1,TRIB3,AKT1,MAPKAP1,VAV1,PAK2,VAV2,PDPK1,CTNNB1,AKT3,CTNNA1,PAK1,MLST8,MTOR,NOS3,RICTOR
266	REACTOME_HYALURONAN_UPTAKE_AND_DEGRADATION	0.00655022	0.0271864	0.685644	1.79395	2	11	CHP1,HEXB,GUSB,SLC9A1,HYAL2,CD44,HYAL1
267	REACTOME_PROSTACYCLIN_SIGNALLING_THROUGH_PROSTACYCLIN_RECEPTOR	0.010846	0.0392544	0.742833	1.79074	4	8	GNAS,GNB2,GNB1,GNG5,GNG4,GNB5
268	REACTOME_INTERLEUKIN_3_INTERLEUKIN_5_AND_GM_CSF_SIGNALING	0.0043573	0.0214408	0.491764	1.79011	1	39	UBC,SHC1,LYN,GAB2,CRKL,PRKACA,PIK3CD,RAPGEF1,GRB2,YES1,YWHAZ,VAV1,CRK,JAK1,CBL,STAT5B,PIK3CB,TEC,STAT5A
269	REACTOME_PROTEIN_PROTEIN_INTERACTIONS_AT_SYNAPSES	0.00457666	0.0216713	0.461434	1.78983	1	53	STX1A,PPFIBP1,EPB41,STXBP1,PDLIM5,DLGAP4,SYT7,SIPA1L1,EPB41L1,HOMER1,HOMER2,PTPRF,APBA3,FLOT1,HOMER3,PPFIA1,CASK,PPFIA3,LRRTM2,DLG3,RTN3,EPB41L5,LRFN3,DLG4,PTPRS,SHARPIN,LRFN4,SHANK2
270	REACTOME_GOLGI_ASSOCIATED_VESICLE_BIOGENESIS	0.00232019	0.0141606	0.464397	1.78911	0	55	FTL,FTH1,ACBD3,PICALM,ARF1,CLINT1,GAK,CLTA,RAB5C,CLTC,OCRL,SNX9,DNM2,AP1B1,SH3D19,NAPA,TPD52,AP3S1,AP3B1,IGF2R,SORT1,CPD,TPD52L1,AP1M1,HIP1R,PUM1,BLOC1S3,BLOC1S4,DNAJC6
271	REACTOME_FOXO_MEDIATED_TRANSCRIPTION_OF_OXIDATIVE_STRESS_METABOLIC_AND_NEURONAL_GENES	0.00215054	0.0141606	0.565562	1.78875	0	20	SREBF1,SMAD3,FOXO3,SOD2,FBXO32,PPARGC1A,FOXO1
272	REACTOME_ALPHA_LINOLENIC_OMEGA3_AND_LINOLEIC_OMEGA6_ACID_METABOLISM	0.00655022	0.0271864	0.68303	1.78711	2	11	FADS1,ELOVL5,FADS2,ACSL1,ELOVL1
273	REACTOME_ASSEMBLY_OF_THE_HIV_VIRION	0.00632911	0.0271864	0.603415	1.78656	2	16	UBC,MVB12A,UBAP1,VPS37C,VPS37B,FURIN,VPS37A,VPS37D,VPS28
274	REACTOME_RUNX2_REGULATES_GENES_INVOLVED_IN_CELL_MIGRATION	0.0130435	0.044238	0.773025	1.7863	5	7	CBFB,ITGA5,AKT2,RUNX2,AKT1,AKT3,MMP13
275	REACTOME_INLA_MEDIATED_ENTRY_OF_LISTERIA_MONOCYTOGENES_INTO_HOST_CELLS	0.00632911	0.0271864	0.715691	1.78294	2	9	UBC,SRC,CTNND1,CTNNB1,CDH1
276	REACTOME_SYNTHESIS_OF_VERY_LONG_CHAIN_FATTY_ACYL_COAS	0.00421053	0.0214408	0.580138	1.78274	1	18	TECR,ELOVL7,ELOVL5,HSD17B12,ACSL3,ACSL1,ELOVL1,ACSL4,ELOVL4
277	REACTOME_SIGNALING_BY_PDGF	0.00675676	0.0276896	0.468167	1.78164	2	46	GRB7,PTPN12,NCK2,CRKL,SRC,BCAR1,RASA1,RAPGEF1,GRB2,CRK,COL4A2,KRAS,HRAS,STAT5B,STAT3,PIK3CB,FURIN,COL4A5,STAT5A
278	REACTOME_GRB2_EVENTS_IN_ERBB2_SIGNALING	0.00653595	0.0271864	0.614771	1.78119	2	15	EREG,HBEGF,EGF,GRB2,ERBB2,KRAS,HRAS,NRG2
279	REACTOME_YAP1_AND_WWTR1_TAZ_STIMULATED_GENE_EXPRESSION	0.00655022	0.0271864	0.680397	1.78022	2	11	YAP1,RUNX2,TEAD3,HIPK2,KAT2B,HIPK1
280	REACTOME_SMAD2_SMAD3_SMAD4_HETEROTRIMER_REGULATES_TRANSCRIPTION	0.00645161	0.0271864	0.50508	1.77629	2	32	UBC,JUNB,SMAD3,SP1,MAPK3,CCNK,SERPINE1,TGIF1,CDK9,CDK8,CDKN2B,E2F5,MYC,SMAD7,SMAD2,MAPK1
281	REACTOME_NCAM_SIGNALING_FOR_NEURITE_OUT_GROWTH	0.0043956	0.0214408	0.488092	1.77338	1	40	ARTN,MAPK3,PTPRA,SPTBN1,SRC,PRNP,GRB2,CACNB1,COL4A2,NRTN,KRAS,HRAS,COL4A5,SPTAN1,AGRN,PTK2,MAPK1,RPS6KA5
282	REACTOME_SENSORY_PERCEPTION	0.00240385	0.0141606	0.387192	1.77177	0	140	LDLR,SDC4,STX1A,ACTG1,SDC1,MSN,SCNN1G,CAPZB,RDH10,GNB1,LHFPL5,ITPR3,SPTBN1,RAB3A,MYO1C,SCNN1B,SCNN1A,DHRS3,TRPM4,ACTB,LRP10,GPC4,EPB41L1,AKR1C1,PRKCA,STRA6,NMT1,DNAJC5,LRP1,GSN,SDC2,RETSAT,RDH11,LRP8,CTBP2,EZR,MYH9,TWF2,RGS9,CIB2,RGS9BP,TRIOBP
283	REACTOME_TRANSLATION_OF_SARS_COV_2_STRUCTURAL_PROTEINS	0.00675676	0.0276896	0.465177	1.77026	2	46	UBC,ST3GAL1,UBE2I,MGAT4B,PRKCSH,ST6GALNAC2,GSK3B,MGAT1,ST6GALNAC4,CSNK1A1,ST6GAL1,GSK3A,MGAT5,MOGS,GANAB,MAN2A1,SUMO1,ST3GAL4
284	REACTOME_EPHA_MEDIATED_GROWTH_CONE_COLLAPSE	0.00649351	0.0271864	0.543256	1.76988	2	23	EPHA2,LYN,SRC,MYH14,RHOA,YES1,EFNA3,NGEF,MYH9,MYH10
285	REACTOME_CELLULAR_RESPONSES_TO_STIMULI	0.00252525	0.0142743	0.327382	1.7678	0	694	HSPA1A,HSPA1B,HSPA6,NR1D1,DNAJB1,H1-0,RRAGD,UBC,DEDD2,GSR,PPP1R15A,HSPB1,CEBPB,JUN,SHC1,DDIT3,ATF3,COX5A,BAG3,HMGA1,NCF1,HERPUD1,FKBP4,HSPA2,BLVRB,RHEB,MAP3K5,SP1,DNAJB9,HMOX1,CSNK2A2,ID1,MAPK3,HSPH1,EDEM1,MT2A,HSPA5,ERN1,CAPZB,VEGFA,CRYAB,ATP6V0B,UBE2D2,
286	REACTOME_NOTCH4_INTRACELLULAR_DOMAIN_REGULATES_TRANSCRIPTION	0.00842105	0.0330226	0.575176	1.76749	3	18	HES1,SMAD3,HEY1,NOTCH2,MAML1,KAT2A,KAT2B
287	REACTOME_SYNTHESIS_OF_LEUKOTRIENES_LT_AND_EOXINS_EX	0.00873362	0.0330226	0.657504	1.76629	3	12	CYP4F3,MAPKAPK2,ABCC1,CYP4F11,ALOX15,ALOX5,LTA4H
288	REACTOME_SIGNALING_BY_NODAL	0.0107066	0.0392009	0.635187	1.76629	4	13	SMAD3,FOXO3,DRAP1,MAPK3,ACVR1B,FURIN,ACVR1C,SMAD2,MAPK1,PCSK6
289	REACTOME_SIGNALING_BY_MAPK_MUTANTS	0.0130435	0.044238	0.764361	1.76628	5	7	DUSP7,DUSP8,DUSP10,DUSP16,DUSP6,MAPK1
290	REACTOME_ARACHIDONIC_ACID_METABOLISM	0.00434783	0.0214408	0.475183	1.76502	1	42	PTGS2,GPX4,CYP4F3,MAPKAPK2,CYP1B1,ALOX15B,ABCC1,CYP4F11,GPX1,HPGD,ALOX15,PTGES2,CBR1,ALOX5,PTGS1,AKR1C3,LTA4H,ALOXE3,PTGES3,PLA2G4A,ALOX12,CYP1A1,CYP2U1
291	REACTOME_REGULATION_OF_TP53_ACTIVITY_THROUGH_ASSOCIATION_WITH_CO_FACTORS	0.00873362	0.0330226	0.656603	1.76387	3	12	ZNF385A,AKT2,TP53BP2,PPP1R13L,AKT1,AKT3,BANP,PHF20,TP53
292	REACTOME_REPRESSION_OF_WNT_TARGET_GENES	0.0173913	0.0549361	0.624607	1.76273	7	14	TLE5,TLE3,TLE1,TLE4,TLE2,TCF7L1,CTBP2,TCF7L2,MYC,CTBP1,TCF7
293	REACTOME_PLATELET_CALCIUM_HOMEOSTASIS	0.00843882	0.0330226	0.595128	1.76203	3	16	ATP2A2,ITPR3,ATP2B4,STIM1,ORAI1,ATP2A3,P2RX4,ITPR2,ORAI2,TRPC6
294	REACTOME_INTERLEUKIN_12_SIGNALING	0.00436681	0.0214408	0.479014	1.76091	1	41	MSN,CNN2,SOD2,ARF1,GSTO1,P4HB,AIP,PAK2,JAK1,CFL1,HNRNPDL,LCP1,RALA,TALDO1,PITPNA,RAP1B,ANXA2
295	REACTOME_PTK6_PROMOTES_HIF1A_STABILIZATION	0.00865801	0.0330226	0.806179	1.75878	3	6	HBEGF,HIF1A,PTK6
296	REACTOME_RHOC_GTPASE_CYCLE	0.00456621	0.0216713	0.433829	1.7586	1	72	PKN1,TJP2,AKAP13,JUP,ARHGEF10L,DIAPH1,RHOC,BCR,ARHGAP1,ARHGEF5,ARHGDIA,LMAN1,RHOA,MYO9B,ARHGEF12,FLOT1,C1QBP,ARHGAP21,ARHGEF1,ABR,CAVIN1,VAV2,ARHGAP35,VAMP3,ARHGAP5,ARHGAP32,ARHGEF40,FMNL3,PREX1,ROCK1,DLC1,STOM,SLK,ARHGAP26,STK10
297	REACTOME_SIGNALING_BY_WNT	0.00242131	0.0141606	0.35671	1.7583	0	257	UBC,PPP2R5A,PIP5K1B,CSNK1E,DVL1,WNT7B,GNB2,SMURF1,CSNK2A2,WNT7A,SNX3,AXIN1,CSNK2A1,PPP2CB,SMARCA4,TLE5,GNB1,ITPR3,DVL2,FZD5,TLE3,RAC2,SOX13,TLE1,PPP2R1A,RAC3,TLE4,KREMEN1,CUL3,RAC1,PSME4,AKT2,CLTA,PPP3R1,DVL3,H2BC21,BCL9L,PPP2CA,AP2A1,AP2A2,AP2S1,CLTC,PSM
298	REACTOME_RESPONSE_OF_MTB_TO_PHAGOCYTOSIS	0.00656455	0.0271864	0.550988	1.75773	2	21	UBC,CORO1A,MAPK3,ATP6V1H,RAB5A,KPNB1,RAB7A,DUSP16,GSK3A
299	REACTOME_INFECTION_WITH_MYCOBACTERIUM_TUBERCULOSIS	0.00860215	0.0330226	0.53788	1.75724	3	24	UBC,CORO1A,MAPK3,ATP6V1H,RAB5A,KPNB1,RAB7A,DUSP16,GSK3A
300	REACTOME_A_TETRASACCHARIDE_LINKER_SEQUENCE_IS_REQUIRED_FOR_GAG_SYNTHESIS	0.00430107	0.0214408	0.555477	1.75685	1	20	SDC4,SDC1,GPC4,XYLT1,SDC2,B3GAT3,CSPG4,XYLT2,B4GALT7,HSPG2,B3GAT2,AGRN,GPC1
301	REACTOME_HS_GAG_BIOSYNTHESIS	0.00431965	0.0214408	0.542705	1.7552	1	22	SDC4,SDC1,HS3ST1,GPC4,EXT1,SLC35D2,HS3ST6,SDC2,HSPG2,AGRN,GPC1
302	REACTOME_MYD88_INDEPENDENT_TLR4_CASCADE	0.00229885	0.0141606	0.408192	1.75507	0	95	UBC,DUSP7,JUN,TNIP2,TICAM1,MAPK3,UBE2D2,RELA,PPP2CB,MAP2K3,FOS,IRAK2,MAPKAPK2,RPS6KA1,PPP2R1A,MAPK9,TAB2,IRAK1,APP,PPP2CA,ELK1,NFKBIA,NFKB2,RIPK2,MAP3K8,MAP2K1,FBXW11,RPS6KA2,MAPK14,MAP2K7,MEF2A,NFKBIB,PPP2R5D,NFKB1,NKIRAS2,DUSP6
303	REACTOME_ACTIVATED_NTRK3_SIGNALS_THROUGH_RAS	0.00865801	0.0330226	0.804397	1.75489	3	6	SHC1,GRB2,KRAS,HRAS
304	REACTOME_COLLAGEN_DEGRADATION	0.0043956	0.0214408	0.482978	1.7548	1	40	MMP14,CTSD,MMP1,COL17A1,ADAM17,CTSB,COL4A2,COL16A1,CTSL,COL18A1,FURIN,COL4A5,MMP10,MMP15,MMP2,COL4A6,COL1A1,MMP9,MMP13,COL12A1,ADAM10,COL4A1
305	REACTOME_REGULATION_OF_HSF1_MEDIATED_HEAT_SHOCK_RESPONSE	0.00461894	0.0217576	0.426114	1.75471	1	78	HSPA1A,HSPA1B,HSPA6,DNAJB1,DEDD2,HSPB1,BAG3,FKBP4,HSPA2,MAPK3,HSPH1,HSPA5,HSF1,SERPINH1,MAPKAPK2,SEC13,TNFRSF21,NUP188,DNAJB6,GSK3B
306	REACTOME_PEXOPHAGY	0.00873362	0.0330226	0.670552	1.75446	3	11	SQSTM1,UBC,MAP1LC3B,EPAS1,RPS27A,UBB,PEX5
307	REACTOME_DEGRADATION_OF_THE_EXTRACELLULAR_MATRIX	0.00230947	0.0141606	0.404866	1.75332	0	98	MMP14,CAPN14,ADAM8,CTSD,LAMC1,CAPN2,CAPN1,MMP1,LAMC2,COL17A1,ADAM17,NID1,BSG,CAPNS1,LAMB3,LAMB1,BMP1,ADAM15,LAMA3,CD44,CTSB,COL4A2,CAPN5,TIMP2,COL16A1,TIMP1,HTRA1,CTSL,COL18A1,FURIN,COL4A5,CAPN12,CDH1,MMP17,MMP10,HSPG2,MMP15,MMP2,COL4A6,CAST,COL1A1,NCSTN,
308	REACTOME_NEGATIVE_REGULATION_OF_FGFR2_SIGNALING	0.00875273	0.0330226	0.549161	1.75189	3	21	UBC,MAPK3,PPP2CB,SRC,PPP2R1A,PPP2CA,GRB2,CBL,MAPK1,BRAF,SPRY2,PTPN11
309	REACTOME_SIGNALING_BY_FGFR4	0.00858369	0.0330226	0.504972	1.7518	3	30	UBC,SHC1,MAPK3,PPP2CB,SRC,PPP2R1A,PPP2CA,GRB2,GAB1,CBL,KRAS,HRAS
310	REACTOME_SYNTHESIS_OF_PC	0.00860215	0.0330226	0.53621	1.75178	3	24	ABHD3,LPIN1,CSNK2A2,CSNK2A1,SLC44A2,MFSD2A,ACHE,CHKA,STARD10,SLC44A1,CHPT1,LPCAT1,LPIN2
311	REACTOME_SHC1_EVENTS_IN_ERBB4_SIGNALING	0.012848	0.044238	0.629794	1.75129	5	13	EREG,HBEGF,SHC1,GRB2,KRAS,HRAS,NRG2
312	REACTOME_SIGNALING_BY_NOTCH1_PEST_DOMAIN_MUTANTS_IN_CANCER	0.00456621	0.0216713	0.452133	1.74937	1	54	HES1,HDAC5,UBC,APH1A,ADAM17,HDAC11,HEY1,TBL1X,HDAC6,CDK8,NCOR2,MAML1,MIB1,NCOR1,MYC,KAT2A,KAT2B,JAG1,HDAC7
313	REACTOME_RAS_SIGNALING_DOWNSTREAM_OF_NF1_LOSS_OF_FUNCTION_VARIANTS	0.0130435	0.044238	0.757032	1.74935	5	7	SPRED2,KRAS,HRAS,NF1,SPRED1,SPRED3
314	REACTOME_SOS_MEDIATED_SIGNALLING	0.0130435	0.044238	0.756924	1.7491	5	7	IRS2,GRB2,KRAS,HRAS
315	REACTOME_INACTIVATION_OF_CSF3_G_CSF_SIGNALING	0.00431965	0.0214408	0.540231	1.7472	1	22	UBC,LYN,UBE2D2,SOCS3,JAK1,SOCS1,STAT5B,STAT3,STAT5A,RNF7,UBE2D3,TYK2,ELOC,RPS27A,UBB,JAK2
316	REACTOME_REGULATION_OF_GENE_EXPRESSION_BY_HYPOXIA_INDUCIBLE_FACTOR	0.00843882	0.0330226	0.700665	1.74551	3	9	VEGFA,HIF1A,ARNT,EPAS1,EP300,CREBBP,CA9
317	REACTOME_NONSENSE_MEDIATED_DECAY_NMD	0.00234742	0.0141606	0.394242	1.74539	0	114	PABPC1,PPP2R2A,CASC3,SMG9,RNPS1,RPS2,SMG7,PPP2R1A,RPL18A,RPS9,PPP2CA,RPLP2,EIF4G1,SMG6,SMG5,UPF1,ETF1,RPL14,RPS15A,RPL13,RPL3,RPS8,RPL18,RPL29,RPL24,RPL34,RPL22L1,RPL17,SMG1,RPL28,RPL12,RPL8,RPS18,RPS12,RPL32,RPS19,RPLP1,RPL4,RPS13,RPL36,RPS20,RPL9,RPL39L
318	REACTOME_ELEVATION_OF_CYTOSOLIC_CA2_LEVELS	0.00843882	0.0330226	0.700353	1.74473	3	9	ITPR3,STIM1,ORAI1,P2RX4,ITPR2,ORAI2,TRPC6
319	REACTOME_SYNTHESIS_OF_IP3_AND_IP4_IN_THE_CYTOSOL	0.00865801	0.0330226	0.535366	1.74417	3	23	PLCD3,ITPKC,PLCD1,PLCG2,ITPK1,OCRL,PLCB3,ITPKB,PTEN,INPP5B
320	REACTOME_PINK1_PRKN_MEDIATED_MITOPHAGY	0.00875273	0.0330226	0.546656	1.74391	3	21	SQSTM1,UBC,MAP1LC3B,MAP1LC3A,TOMM20,PRKN,MFN2,VDAC1,PINK1
321	REACTOME_BINDING_AND_UPTAKE_OF_LIGANDS_BY_SCAVENGER_RECEPTORS	0.00647948	0.0271864	0.539079	1.74348	2	22	FTL,FTH1,HSPH1,SCARB1,LRP1,HSP90B1,COL4A2,HYOU1,SPARC,COL1A1,CALR
322	REACTOME_REGULATION_OF_TP53_EXPRESSION_AND_DEGRADATION	0.00646552	0.0271864	0.483189	1.74196	2	37	UBC,RFFL,PRDM1,PPP2CB,PPP2R1A,AKT2,PPP2CA,CCNA1,USP7,AKT1,MAPKAP1,PDPK1,AKT3,DAXX,MLST8,MTOR,USP2,PPP2R5C,PHF20,TP53,RICTOR,CDKN2A,RPS27A,UBB
323	REACTOME_DEACTIVATION_OF_THE_BETA_CATENIN_TRANSACTIVATING_COMPLEX	0.0043573	0.0214408	0.478273	1.741	1	39	UBC,TLE3,SOX13,TLE1,TLE4,AKT2,BCL9L,TLE2,SOX4,YWHAZ,AKT1,CTNNBIP1,SOX9,TCF7L1,TCF7L2,XIAP,CTNNB1,SOX7
324	REACTOME_PLATELET_SENSITIZATION_BY_LDL	0.0108932	0.0392544	0.600691	1.7404	4	15	PPP2R5A,PPP2CB,PPP2R1A,PPP2CA,LRP8,PPP2R5B,MAPK14,PPP2R5D,PTPN6,PPP2R5E,PLA2G4A,PTPN11,PPP2R5C
325	REACTOME_KERATAN_SULFATE_KERATIN_METABOLISM	0.00628931	0.0271864	0.510552	1.74018	2	28	ST3GAL1,B4GALT5,HEXB,B4GALT3,B3GNT3,CHST6,SLC35D2,B4GALT2,B4GALT1,B3GNT7,B4GALT4,GNS,ST3GAL4
326	REACTOME_SIGNAL_REGULATORY_PROTEIN_FAMILY_INTERACTIONS	0.00867679	0.0330226	0.685125	1.73979	3	10	SRC,GRB2,SIRPA,PTK2B,PTPN6,PTK2,PTPN11,SKAP2,CD47,FYB1
327	REACTOME_DARPP_32_EVENTS	0.00645161	0.0271864	0.54819	1.7338	2	20	PPP2CB,PPP3CC,PPP2R1A,PPP3R1,PRKACA,PPP2CA,PPP3CB,PDE4A,PPP2R5D,PPP3CA
328	REACTOME_COSTIMULATION_BY_THE_CD28_FAMILY	0.00697674	0.0283112	0.450326	1.73147	2	52	PPP2R5A,LYN,PPP2CB,SRC,PPP2R1A,RAC1,AKT2,PPP2CA,CD274,GRB2,TRIB3,YES1,CSK,AKT1,MAPKAP1,VAV1,PAK2,MAP3K8,PPP2R5B,PDPK1,PPP2R5D,AKT3,TNFRSF14,PTPN6,CD86,PAK1,MLST8,PIK3CA,MTOR,PPP2R5E,PTPN11,PPP2R5C
329	REACTOME_SYNTHESIS_OF_15_EICOSATETRAENOIC_ACID_DERIVATIVES	0.012987	0.044238	0.791687	1.72716	5	6	PTGS2,GPX4,ALOX15B,GPX1,ALOX15
330	REACTOME_SHC_MEDIATED_CASCADE_FGFR3	0.00843882	0.0330226	0.693181	1.72686	3	9	SHC1,GRB2,KRAS,HRAS
331	REACTOME_DEFECTIVE_EXT2_CAUSES_EXOSTOSES_2	0.0171306	0.0545404	0.620239	1.72472	7	13	SDC4,SDC1,GPC4,EXT1,SDC2,HSPG2,AGRN,GPC1
332	REACTOME_TRANSFERRIN_ENDOCYTOSIS_AND_RECYCLING	0.0107066	0.0392009	0.522264	1.72223	4	25	ATP6V0B,ATP6V0D1,ATP6AP1,ATP6V1A,ATP6V1H,TCIRG1,ATP6V1F,ATP6V0A1,ATP6V1C2,ATP6V0E2
333	REACTOME_PYRUVATE_METABOLISM_AND_CITRIC_ACID_TCA_CYCLE	0.01373	0.0460812	0.443966	1.72207	5	53	PPARD,ME1,SLC16A3,PDP2,MPC1,OGDH,ACO2,IDH2,MDH2,CS,BSG,ME2,RXRA,VDAC1,DLST,L2HGDH,SDHB,PDHA1,NNT,HAGH,MPC2,IDH3G
334	REACTOME_REGULATION_OF_BETA_CELL_DEVELOPMENT	0.00875273	0.0330226	0.53966	1.72159	3	21	HES1,AKT2,AKT1,FOXA2,MAML1,FOXO1,KAT2A,AKT3,KAT2B
335	REACTOME_SEMA4D_MEDIATED_INHIBITION_OF_CELL_ATTACHMENT_AND_MIGRATION	0.0130152	0.044238	0.713869	1.72092	5	8	RRAS,RND1,RAC1,RHOA,ARHGAP35,SEMA4D,MET
336	REACTOME_TRANSLATION_OF_SARS_COV_1_STRUCTURAL_PROTEINS	0.0104822	0.0389097	0.504844	1.72073	4	28	UBC,ST3GAL1,UBE2I,PRKCSH,ST6GALNAC2,GSK3B,MGAT1,ST6GALNAC4,ST6GAL1,GSK3A,MOGS,GANAB,SUMO1,ST3GAL4
337	REACTOME_SARS_COV_INFECTIONS	0.00242718	0.0141606	0.376719	1.71987	0	141	RCOR1,UBC,ATP1B1,IL6R,FKBP4,ST3GAL1,VEGFA,UBE2I,MGAT4B,IFNGR2,GATAD2B,PRKCSH,ATP1A1,TMPRSS2,CUL3,KEAP1,ITGB1,AP2A1,MAP1LC3B,RBBP7,ST6GALNAC2,PHF21A,AP2A2,AP2S1,GATAD2A,GSK3B,MGAT1,CHMP4B,CHMP7,JAK1,ST6GALNAC4,CSNK1A1,CHD4,ST6GAL1,GSK3A,SIGMAR1,MGAT5,CTSL,
338	REACTOME_ADRENALINE_NORADRENALINE_INHIBITS_INSULIN_SECRETION	0.0152505	0.0500379	0.593285	1.71894	6	15	GNB2,GNB1,GNAI2,GNAI1,GNG5,GNG4,GNB5,CACNB3
339	REACTOME_UPTAKE_AND_FUNCTION_OF_DIPHTHERIA_TOXIN	0.012987	0.044238	0.7875	1.71803	5	6	HBEGF,EEF2,HSP90AB1
340	REACTOME_INTERLEUKIN_12_FAMILY_SIGNALING	0.00669643	0.0275907	0.447231	1.71601	2	48	MSN,CNN2,SOD2,ARF1,GSTO1,CRLF1,P4HB,AIP,PAK2,JAK1,CFL1,HNRNPDL,STAT3,LCP1,RALA,TALDO1,PITPNA,RAP1B,ANXA2,IL23A,SNRPA1,IL27RA,TYK2
341	REACTOME_NEGATIVE_REGULATION_OF_MET_ACTIVITY	0.0106383	0.0392009	0.549192	1.71591	4	19	UBC,PTPN1,SH3GL1,SH3KBP1,GRB2,PTPRJ,CBL,STAM,MET,PTPN2
342	REACTOME_SIGNALING_BY_ACTIVIN	0.0195652	0.0596004	0.607842	1.71541	8	14	SMAD3,DRAP1,MAPK3,FST,ACVR1B,ACVR1C,FSTL3,SMAD2,MAPK1
343	REACTOME_SIGNALING_BY_MST1	0.00641026	0.0271864	0.899434	1.71526	2	4	SPINT1,SPINT2,MST1R
344	REACTOME_SRP_DEPENDENT_COTRANSLATIONAL_PROTEIN_TARGETING_TO_MEMBRANE	0.00234742	0.0141606	0.38966	1.71518	0	111	RPS2,RPL18A,RPS9,RPLP2,SRPRA,SRP68,RPL14,RPS15A,SEC11A,RPL13,SSR3,RPL3,RPS8,RPL18,RPL29,RPL24,RPL34,RPL22L1,RPL17,RPN1,DDOST,SSR2,RPL28,RPL12,RPL8,RPS18,RPS12,RPL32,RPS19,RPLP1,RPL4,RPS13,RPL36,RPS20,RPL9,RPL39L,RPLP0,RPL10,RPS24,RPL27A,RPS28,RPS3,RPL19,R
345	REACTOME_FIBRONECTIN_MATRIX_FORMATION	0.0113379	0.0402348	0.850144	1.71237	4	5	CEACAM1,ITGA5,ITGB1
346	REACTOME_VITAMIN_C_ASCORBATE_METABOLISM	0.0130152	0.044238	0.710153	1.71196	5	8	SLC2A1,CYB5R3,GSTO1,SLC2A3,CYB5A,SLC23A2
347	REACTOME_RAP1_SIGNALLING	0.0214133	0.0637649	0.615385	1.71122	9	13	SIPA1,RAP1GAP,PRKACA,YWHAZ,RAF1,RAP1A,RAP1B
348	REACTOME_GLUCONEOGENESIS	0.00823045	0.0328199	0.505734	1.7106	3	27	PC,GPI,MDH2,GOT1,SLC25A1,ENO2,GOT2,SLC25A11,ALDOC,PGAM1,SLC37A2,ALDOA,G6PC3
349	REACTOME_IRON_UPTAKE_AND_TRANSPORT	0.00917431	0.0342919	0.446395	1.70839	3	50	UBC,FTL,HMOX1,FTH1,ATP6V0B,ATP6V0D1,ATP6AP1,ATP6V1A,ATP6V1H,TCIRG1
350	REACTOME_GABA_SYNTHESIS_RELEASE_REUPTAKE_AND_DEGRADATION	0.00873362	0.0330226	0.652932	1.70836	3	11	STX1A,STXBP1,RAB3A,DNAJC5
351	REACTOME_BIOSYNTHESIS_OF_EPA_DERIVED_SPMS	0.0151515	0.0499225	0.7827	1.70756	6	6	PTGS2,GPX4,HPGD,ALOX15,ALOX5,LTA4H
352	REACTOME_FCGR3A_MEDIATED_IL10_SYNTHESIS	0.0107066	0.0392009	0.498394	1.70677	4	29	LYN,AHCYL1,ITPR3,SRC,PRKACA,PLCG2,YES1,ADCY7,ADCY9
353	REACTOME_L1CAM_INTERACTIONS	0.00455581	0.0216713	0.40001	1.7053	1	89	ACTG1,MSN,CSNK2A2,MAPK3,CSNK2A1,LAMC1,MAP2K2,SPTBN1,SRC,RANBP9,RPS6KA1,ITGA5,RAC1,ITGB1,CLTA,ACTB,NRP2,AP2A1,AP2A2,AP2S1,CLTC,DNM2,SDCBP,TUBB2A,LAMB1,MAP2K1,EZR,RPS6KA2,VAV2,TUBA4A,AP2B1,SPTAN1,EPHB2,CD24,RPS6KA4,PAK1,DLG3,MAPK1,AP2M1,NRCAM,RPS6KA5
354	REACTOME_REGULATION_OF_SIGNALING_BY_CBL	0.0107527	0.0392544	0.539105	1.70507	4	20	UBC,LYN,CRKL,PIK3CD,RAPGEF1,GRB2,YES1,VAV1,CRK,CBL,PIK3CB
355	REACTOME_INTRINSIC_PATHWAY_FOR_APOPTOSIS	0.01373	0.0460812	0.439574	1.70504	5	53	BBC3,MAPK3,PPP3CC,BCL2L1,BAK1,AKT2,TP53BP2,SFN,PPP3R1,PMAIP1,YWHAZ,AKT1,YWHAG,NMT1,C1QBP,YWHAH,STAT3,BCL2L11,XIAP,BCL2,AKT3,APAF1,YWHAQ
356	REACTOME_JOSEPHIN_DOMAIN_DUBS	0.010917	0.0392544	0.651106	1.70358	4	11	UBC,RAD23A,RAD23B,JOSD1,PRKN,VCP
357	REACTOME_METABOLISM_OF_FAT_SOLUBLE_VITAMINS	0.0109649	0.0392544	0.481567	1.7034	4	33	LDLR,SDC4,SDC1,LRP10,GPC4,AKR1C1,LRP1,SDC2,RETSAT,RDH11,LRP8,HSPG2,AGRN,AKR1C3,GPC1
358	REACTOME_G_ALPHA_Q_SIGNALLING_EVENTS	0.00238663	0.0141606	0.390609	1.70291	0	107	HBEGF,GRK2,GNB2,MAPK3,P2RY2,PTAFR,GNB1,ITPR3,GNA15,ABHD12,RPS6KA1,LPAR5,APP,DGKA,RGS3,PRKCD,DGKE,GRB2,DGKZ,PRKCA,PLCB3,GNG5,KRAS,HRAS,RGS17,DGKH,RPS6KA2,GNG4,BDKRB1,PRKCH,GNA11,TRIO,GNRH1,NMB,F2RL1,MGLL,LPAR2,MAPK1,GRK5,PIK3CA,GNB5,ANXA1,RGS19
359	REACTOME_G_ALPHA_I_SIGNALLING_EVENTS	0.00246914	0.0141606	0.371008	1.70196	0	149	GNAS,RGS12,GRK2,GNB2,AHCYL1,PPP2CB,PPP3CC,GNB1,ITPR3,GNA15,SRC,GNAI2,RGS10,PPP2R1A,RGS14,LPAR5,APP,PPP3R1,PRKACA,PPP2CA,HEBP1,RGS3,PRKCD,CXCL16,PPP3CB,PRKCA,GNAI1,ADCY7,PLCB3,S1PR2,GNG5,DRD4,PSAP,RGS17,HCAR3,GNG4,ADCY9,PDE4A,CXCL8,BDKRB1,GNA11,GNAI3,RGS9,
360	REACTOME_ESR_MEDIATED_SIGNALING	0.00244499	0.0141606	0.361223	1.70133	0	176	EREG,HBEGF,HSPB1,JUND,FOXO3,JUN,SHC1,FKBP4,SP1,CBFB,GNB2,MAPK3,ZNF217,AXIN1,CDKN1B,CTSD,RAD21,FKBP5,GNB1,TLE3,FOS,SRC,GNAI2,ZDHHC7,STRN,EGF,USF2,NCOA3,YY1,AKT2,SPHK1,FOSB,H2BC21,AREG,ELK1,GTF2F1,CXXC5,TGFA,AKT1,GNAI1,GNG5,POU2F1,CARM1,CDK9,KRAS,HRAS,GNG4,
361	REACTOME_NR1H2_NR1H3_REGULATE_GENE_EXPRESSION_LINKED_TO_LIPOGENESIS	0.0130152	0.044238	0.704847	1.69917	5	8	SREBF1,FASN,SCD,RXRA,NR1H2
362	REACTOME_REGULATION_OF_MRNA_STABILITY_BY_PROTEINS_THAT_BIND_AU_RICH_ELEMENTS	0.00440529	0.0214408	0.399611	1.69896	1	85	HSPA1A,ZFP36L1,ZFP36,UBC,HSPB1,PABPC1,HNRNPD,MAPKAPK2,PSME4,ELAVL1,PRKCD,EIF4G1,PSMA6,SET,PSMD3,YWHAZ,PRKCA,AKT1
363	REACTOME_CHONDROITIN_SULFATE_DERMATAN_SULFATE_METABOLISM	0.0108696	0.0392544	0.457211	1.69826	4	42	SDC4,SDC1,HEXB,GPC4,XYLT1,UST,SDC2,B3GAT3,HYAL1,CSGALNACT2,CHPF,CSPG4,XYLT2,CHST11,B4GALT7,HSPG2,B3GAT2,DSE,AGRN,GPC1
364	REACTOME_GAB1_SIGNALOSOME	0.0105263	0.0389837	0.564051	1.6964	4	17	EREG,HBEGF,SRC,EGF,AREG,GRB2,TGFA,CSK,GAB1
365	REACTOME_ERBB2_REGULATES_CELL_MOTILITY	0.0217391	0.0644968	0.598425	1.68884	9	14	EREG,HBEGF,DIAPH1,EGF,RHOA,ERBB2,NRG2
366	REACTOME_RUNX1_INTERACTS_WITH_CO_FACTORS_WHOSE_PRECISE_EFFECT_ON_RUNX1_TARGETS_IS_NOT_KNOWN	0.00666667	0.0275385	0.473787	1.68806	2	36	CBFB,CSNK2A2,CSNK2A1,SMARCA4,RYBP,PHC2,CBX4,RING1,SMARCB1,SMARCC1,HIPK2,CBX6,PCGF5,SMARCD2,ARID1B,PHC1,SMARCD1
367	REACTOME_VISUAL_PHOTOTRANSDUCTION	0.00683371	0.0278712	0.425275	1.68752	2	63	LDLR,SDC4,SDC1,RDH10,GNB1,DHRS3,LRP10,GPC4,AKR1C1,PRKCA,STRA6,NMT1,LRP1,SDC2,RETSAT,RDH11,LRP8,RGS9,RGS9BP,HSPG2,AGRN,AKR1C3,CNGA1,GPC1,GNB5
368	REACTOME_TRANSPORT_OF_NUCLEOSIDES_AND_FREE_PURINE_AND_PYRIMIDINE_BASES_ACROSS_THE_PLASMA_MEMBRANE	0.010846	0.0392544	0.664484	1.68738	4	10	SLC29A1,SLC25A6,SLC25A4,ARL2,SLC25A5
369	REACTOME_NEGATIVE_FEEDBACK_REGULATION_OF_MAPK_PATHWAY	0.0194805	0.0596004	0.772771	1.6859	8	6	MAPK3,MAP2K2,RAF1,MAP2K1,MAPK1,BRAF
370	REACTOME_INTERLEUKIN_20_FAMILY_SIGNALING	0.0168421	0.0538346	0.548566	1.68572	7	18	SOCS3,IFNLR1,JAK1,STAT5B,STAT3,IL22RA1,STAT5A,PTPN11,JAK3,TYK2
371	REACTOME_ECM_PROTEOGLYCANS	0.00653595	0.0271864	0.446887	1.68425	2	44	TGFB1,LAMC1,ITGB5,APP,ITGB1,SERPINE1,LAMB1,LAMA3,COL4A2,TNC,DAG1,COL4A5,HSPG2,LAMB2,AGRN,COL4A6,SPARC,COL1A1,ITGB3,PTPRS,TNXB,COL4A1,LAMA1,COL6A1
372	REACTOME_CELLULAR_RESPONSE_TO_HEAT_STRESS	0.00229885	0.0141606	0.391468	1.68316	0	95	HSPA1A,HSPA1B,HSPA6,DNAJB1,DEDD2,HSPB1,BAG3,FKBP4,HSPA2,MAPK3,HSPH1,HSPA5,CRYAB,HSF1,SERPINH1,MAPKAPK2,SEC13,TNFRSF21,NUP188,DNAJB6,GSK3B,HSPB8,NUP58,BAG4,POM121C,HDAC6
373	REACTOME_RHOH_GTPASE_CYCLE	0.0109649	0.0392544	0.475558	1.68215	4	33	JUP,PAK4,OSBPL11,PAK6,SLC1A5,ARHGDIA,SLC4A7,RAB7A,CSK,PAK2,DBN1,NSFL1C,VAMP3,VCP,LAMTOR1,PAK1,FAM91A1,ROCK1,STOM
374	REACTOME_NRIF_SIGNALS_CELL_DEATH_FROM_THE_NUCLEUS	0.0239651	0.0683325	0.580458	1.68178	10	15	SQSTM1,UBC,APH1A,NGFR
375	REACTOME_SENSORY_PROCESSING_OF_SOUND	0.00235849	0.0141606	0.436761	1.68138	0	57	STX1A,ACTG1,MSN,CAPZB,LHFPL5,SPTBN1,RAB3A,MYO1C,ACTB,EPB41L1,DNAJC5,GSN,CTBP2,EZR,MYH9,TWF2,CIB2,TRIOBP,CASK,KCNMA1,SPTAN1,EPS8L2
376	REACTOME_PRESYNAPTIC_FUNCTION_OF_KAINATE_RECEPTORS	0.0130152	0.044238	0.661992	1.68105	5	10	GNB2,GNB1,PLCB3,GNG5,GNG4,GNB5
377	REACTOME_DOWNREGULATION_OF_ERBB2_ERBB3_SIGNALING	0.0235546	0.0683325	0.604431	1.68076	10	13	UBC,AKT2,AKT1,ERBB2,NRG2,RNF41,AKT3,ERBB3
378	REACTOME_NEF_MEDIATED_CD4_DOWN_REGULATION	0.021097	0.0630563	0.674602	1.68058	9	9	ARF1,ATP6V1H,AP2A1,AP2A2,AP2S1,AP2B1,AP2M1
379	REACTOME_SHC_MEDIATED_CASCADE_FGFR1	0.021097	0.0630563	0.674555	1.68046	9	9	SHC1,GRB2,KRAS,HRAS
380	REACTOME_ACYL_CHAIN_REMODELLING_OF_PS	0.023913	0.0683325	0.595161	1.67963	10	14	LPCAT4,OSBPL10,PLAAT3,PLA2G4E,OSBPL5,PLA2G4A,OSBPL8,PLA2G4F,LPCAT3
381	REACTOME_RUNX3_REGULATES_WNT_SIGNALING	0.0173536	0.0549246	0.696129	1.67815	7	8	TCF7L1,TCF7L2,CTNNB1,MYC,RUNX3,CCND1,TCF7
382	REACTOME_NEF_MEDIATED_CD8_DOWN_REGULATION	0.0194805	0.0596004	0.768293	1.67613	8	6	ATP6V1H,AP2A1,AP2A2,AP2S1,AP2B1,AP2M1
383	REACTOME_DOWNREGULATION_OF_ERBB2_SIGNALING	0.0144033	0.0481405	0.495201	1.67498	6	27	UBC,EREG,HBEGF,PTPN12,EGF,AKT2,AKT1,ERBB2,NRG2,CDC37,RNF41,AKT3
384	REACTOME_REGULATION_OF_GLYCOLYSIS_BY_FRUCTOSE_2_6_BISPHOSPHATE_METABOLISM	0.0152838	0.0500453	0.639512	1.67325	6	11	PFKFB2,PPP2CB,PPP2R1A,PRKACA,PPP2CA,PPP2R5D
385	REACTOME_REGULATION_OF_COMMISSURAL_AXON_PATHFINDING_BY_SLIT_AND_ROBO	0.0173536	0.0549246	0.694083	1.67322	7	8	SRC,NTN1,SLIT2,ROBO1,ROBO3
386	REACTOME_SIGNALING_BY_ERBB2_IN_CANCER	0.012848	0.044238	0.507254	1.67273	5	25	EREG,HBEGF,PTPN12,SHC1,EGF,GRB2,GAB1,ERBB2,KRAS,HRAS,NRG2,CDC37
387	REACTOME_ONCOGENE_INDUCED_SENESCENCE	0.0109649	0.0392544	0.472892	1.67272	4	33	UBC,SP1,ID1,MAPK3,CDKN2D,ETS1,CDKN2B,ETS2
388	REACTOME_CITRIC_ACID_CYCLE_TCA_CYCLE	0.012959	0.044238	0.516922	1.67182	5	22	OGDH,ACO2,IDH2,MDH2,CS,ME2,DLST,SDHB,NNT,IDH3G
389	REACTOME_OTHER_INTERLEUKIN_SIGNALING	0.0210526	0.0630563	0.543737	1.67088	9	18	STX1A,SDC1,IFNLR1,STXBP2,STX3,STX4,JAK1
390	REACTOME_RESPONSE_TO_METAL_IONS	0.0173536	0.0549246	0.693073	1.67078	7	8	MT2A,CSRP1,MTF1,MT1X
391	REACTOME_HYALURONAN_METABOLISM	0.0239651	0.0683325	0.576628	1.67068	10	15	CHP1,HEXB,GUSB,HAS3,SLC9A1,HYAL2,CD44,HYAL1,CEMIP
392	REACTOME_IRAK2_MEDIATED_ACTIVATION_OF_TAK1_COMPLEX	0.0151844	0.0499225	0.657345	1.66925	6	10	UBC,IRAK2,TAB2,TAB3,MAP3K7,RPS27A,UBB
393	REACTOME_AKT_PHOSPHORYLATES_TARGETS_IN_THE_NUCLEUS	0.0151844	0.0499225	0.657161	1.66878	6	10	NR4A1,FOXO3,AKT2,AKT1,FOXO1,AKT3,RPS6KB2,FOXO6
394	REACTOME_NUCLEAR_EVENTS_STIMULATED_BY_ALK_SIGNALING_IN_CANCER	0.0212766	0.0634752	0.534003	1.66845	9	19	JUNB,CEBPB,MAPK3,BCL2A1,CLTC,MECP2,STAT3,KIF5B,STAT5A
395	REACTOME_INFECTIOUS_DISEASE	0.00252525	0.0142743	0.308909	1.66805	0	694	HSPA1A,RCOR1,UBC,HBEGF,ADM,JUN,WASF2,CORO1A,STX1A,GNAS,GTF2E2,ACTG1,MVB12A,ATP1B1,IL6R,HLA-A,HMGA1,DVL1,WASL,TGFB1,FKBP4,LYN,GNB2,ST3GAL1,EEF2,AHCYL1,HMOX1,MAPK3,NCKAP1,VEGFA,SLC25A6,RELA,UBE2I,MGAT4B,CEBPD,RPS2,UBAP1,IFNGR2,GATAD2B,MAP2K3,GNB1,ITPR3,DVL2
396	REACTOME_TRAF6_MEDIATED_INDUCTION_OF_TAK1_COMPLEX_WITHIN_TLR4_COMPLEX	0.0239651	0.0683325	0.575462	1.6673	10	15	UBC,TICAM1,IRAK2,TAB2,TAB3,CD14,MAP3K7,RPS27A,UBB
397	REACTOME_RUNX3_REGULATES_CDKN1A_TRANSCRIPTION	0.0195652	0.0596004	0.720996	1.66608	8	7	SMAD3,TGFB1,CDKN1A,RUNX3,TP53
398	REACTOME_ADP_SIGNALLING_THROUGH_P2Y_PURINOCEPTOR_1	0.0239651	0.0683325	0.574982	1.66591	10	15	GNB2,GNB1,GNA15,SRC,GNG5,MAPK14,GNG4,GNA11,GNB5,PLA2G4A
399	REACTOME_REGULATION_OF_RUNX1_EXPRESSION_AND_ACTIVITY	0.0168421	0.0538346	0.553028	1.66324	7	17	CBFB,SRC,CCND2,PML,AGO2,CCND3,CCND1,PTPN11
400	REACTOME_IRAK1_RECRUITS_IKK_COMPLEX	0.023913	0.0683325	0.589248	1.66294	10	14	UBC,PELI1,IRAK1,PELI2
401	REACTOME_G_PROTEIN_MEDIATED_EVENTS	0.0135135	0.0457359	0.436866	1.66252	5	46	GRK2,AHCYL1,ITPR3,GNA15,GNAI2,PRKACA,PRKCD,PRKCA,GNAI1,ADCY7,PLCB3,ADCY9,GNA11,GNAI3,CAMK2D,PRKX,CAMK2G,CAMKK2,MAPK1,PLA2G4A
402	REACTOME_TRANSPORT_OF_SMALL_MOLECULES	0.00243902	0.0141606	0.312054	1.66209	0	531	TSC22D3,LRRC8A,NPC1,LIPG,UBC,FTL,SLC27A1,LDLR,SLC22A18,VDAC2,SLC29A1,TRPV3,GNAS,ATP1B1,SLC2A1,SLC12A6,SLC10A6,SLC16A3,GNB2,LDLRAP1,HMOX1,SLC7A11,FTH1,SLCO4A1,SCNN1G,NIPA1,SLC25A6,ATP6V0B,SLC30A1,PCSK9,ATP8B1,WWP1,SCARB1,NIPAL4,ATP2A2,AHCYL2,AQP3,SLC7A8,GN
403	REACTOME_NEGATIVE_REGULATION_OF_FLT3	0.0174672	0.0550085	0.635245	1.66208	7	11	UBC,PTPRJ,CSK,CBL
404	REACTOME_BMAL1_CLOCK_NPAS2_ACTIVATES_CIRCADIAN_GENE_EXPRESSION	0.012848	0.044238	0.503847	1.66149	5	25	DBP,BHLHE40,SERPINE1,PPARA,NCOA6,RXRA,CARM1,NOCT,NAMPT,NPAS2,TBL1X,HELZ2,ARNTL2,BHLHE41
405	REACTOME_TRANSCRIPTIONAL_REGULATION_BY_RUNX2	0.00240385	0.0141606	0.382796	1.66086	0	106	HES1,UBC,CBFB,ESRRA,SMURF1,MAPK3,WWP1,SRC,BMP2,CDKN1A,ITGA5,PSME4,AKT2,YAP1,RBM14,TWIST1,MAF,PSMA6,YES1,RUNX2,PSMD3,AKT1,SATB2,SOX9,GSK3B,HEY1
406	REACTOME_KERATAN_SULFATE_BIOSYNTHESIS	0.012959	0.044238	0.513376	1.66035	5	22	ST3GAL1,B4GALT5,B4GALT3,B3GNT3,CHST6,SLC35D2,B4GALT2,B4GALT1,B3GNT7,B4GALT4,ST3GAL4
407	REACTOME_TOLL_LIKE_RECEPTOR_CASCADES	0.00243309	0.0141606	0.364862	1.66007	0	136	UBC,DUSP7,JUN,PELI1,TNIP2,TICAM1,MAPK3,UBE2D2,RELA,ECSIT,PPP2CB,MAP2K3,FOS,IRAK2,MAPKAPK2,RPS6KA1,PPP2R1A,MAPK9,TAB2,IRAK1,APP,PELI2,PPP2CA,PLCG2,ELK1,DNM2,UNC93B1,NFKBIA,NFKB2,RIPK2,MAP3K8,MAP2K1,LGMN,FBXW11,HSP90B1,CNPY3,CTSB,SOCS1,RPS6KA2,MAPK14,CTSL,M
408	REACTOME_TRANSPORT_TO_THE_GOLGI_AND_SUBSEQUENT_MODIFICATION	0.00243902	0.0141606	0.356111	1.65895	0	162	SEC24A,CAPZB,KDELR1,MGAT4B,FUT3,B4GALT5,SEC24D,SPTBN1,DCTN2,GOLGA2,FUCA1,ARF1,B4GALT3,MAN1C1,SEC13,SEC23A,ARF5,LMAN2,KDELR2,TRAPPC9,TMED10,AREG,ARCN1,TRAPPC1,SEC24C,COPE,ARF3,LMAN1,TGFA,TMED3,TUBB2A,CSNK1D,RAB1A,CD55,MGAT1,B4GALT2,NAPA,KDELR3,ST6GAL1,B4GA
409	REACTOME_RHO_GTPASES_ACTIVATE_NADPH_OXIDASES	0.0150538	0.0499004	0.524276	1.65817	6	20	NCF1,MAPK3,RAC2,RAC1,PRKCD,PRKCA,MAPK14,PRKCZ,S100A9,MAPK1,NOXA1
410	REACTOME_REGULATION_OF_GENE_EXPRESSION_IN_BETA_CELLS	0.0238095	0.0683325	0.759827	1.65766	10	6	AKT2,AKT1,FOXA2,FOXO1,AKT3
411	REACTOME_TFAP2_AP_2_FAMILY_REGULATES_TRANSCRIPTION_OF_CELL_CYCLE_FACTORS	0.0136054	0.0459505	0.822533	1.65676	5	5	CDKN1A,TFAP2A,KDM5B,MYC,TFAP2C
412	REACTOME_FLT3_SIGNALING_IN_DISEASE	0.012848	0.044238	0.50228	1.65632	5	25	PIM1,UBC,GAB2,BCL2L1,SPTBN1,CDKN1A,MYO18A,GRB2,CBL,KRAS,HRAS,STAT5B,ETV6,STAT5A
413	REACTOME_COLLAGEN_FORMATION	0.00458716	0.0216713	0.413349	1.6556	1	67	CRTAP,SERPINH1,LAMC2,COL17A1,COLGALT1,PCOLCE2,LAMB3,P4HB,BMP1,PLOD3,ITGA6,ITGB4,LAMA3,PLEC,CTSB,COL4A2,CD151,COL16A1,CTSL,COL18A1,COL4A5,P3H3,LOXL4,COL4A6,P3H2,COL1A1,MMP9,P4HA2,PLOD1,LOXL2,P3H1,MMP13
414	REACTOME_SUMOYLATION_OF_INTRACELLULAR_RECEPTORS	0.0167015	0.0535977	0.494097	1.64925	7	26	UBE2I,PPARG,THRA,PPARA,RARA,RXRA,SUMO3,NR3C2,THRB,SUMO1,NR1H2,RORA,SUMO2,PIAS3,PIAS4,PIAS2
415	REACTOME_CD28_DEPENDENT_VAV1_PATHWAY	0.0232068	0.0677284	0.661847	1.6488	10	9	RAC1,GRB2,VAV1,PAK2,CD86,PAK1
416	REACTOME_INTERFERON_GAMMA_SIGNALING	0.00453515	0.0216713	0.400943	1.6483	1	77	HLA-A,TRIM29,IRF6,MT2A,IRF1,PTAFR,HLA-E,SOCS3,IFNGR2,PTPN1,TRIM8,PRKCD,HLA-C,IRF5,HLA-B,TRIM25,JAK1,CD44,SOCS1,TRIM14,HLA-F,PML,ICAM1,SUMO1,CAMK2D,IRF2,CAMK2G,GBP2,IRF7,PTPN6,HLA-H,PTPN2
417	REACTOME_CHREBP_ACTIVATES_METABOLIC_GENE_EXPRESSION	0.0195652	0.0596004	0.713042	1.6477	8	7	FASN,ACACA,ACLY,MLX,AGPAT1,MLXIPL
418	REACTOME_SIGNALING_BY_TGF_BETA_RECEPTOR_COMPLEX_IN_CANCER	0.0195228	0.0596004	0.683249	1.6471	8	8	SMAD3,TGFB1,TGFBR1,SMAD2
419	REACTOME_PHASE_4_RESTING_MEMBRANE_POTENTIAL	0.0195652	0.0596004	0.712708	1.64692	8	7	KCNK1,KCNK5,KCNK6
420	REACTOME_RHOU_GTPASE_CYCLE	0.0153173	0.050053	0.455091	1.64653	6	38	EPHA2,NCK2,PAK4,SPTBN1,SRC,CLTC,GRB2,ITSN2,PAK2,PTK2B,GIT1,ARHGEF7,SRGAP2,STAM,SPTAN1,PAK1,WWP2,TXNL1,DLG5,PARD6A,HGS,USP9X
421	REACTOME_ION_CHANNEL_TRANSPORT	0.00241546	0.0141606	0.363933	1.64565	0	129	TSC22D3,UBC,TRPV3,ATP1B1,SCNN1G,ATP6V0B,ATP8B1,WWP1,ATP2A2,ATP2B4,ATP1A1,SCNN1B,ATP6V0D1,SCNN1A,ATP6AP1,ATP12A,ATP6V1A,ATP6V1H,TCIRG1,TRPM4,WNK1,ANO10,ATP8B2,ASPH,RYR1,ATP11B,RAF1,ANO9,ATP6V1F,ATP6V0A1,ATP13A2,ATP8B3,NEDD4L,TPCN1,FKBP1B,OSTM1,CLCN6,CAMK2D
422	REACTOME_ESTROGEN_STIMULATED_SIGNALING_THROUGH_PRKCZ	0.0281385	0.0780227	0.754317	1.64564	12	6	KRAS,HRAS,PDPK1,PRKCZ,MAPK1
423	REACTOME_TANDEM_PORE_DOMAIN_POTASSIUM_CHANNELS	0.00630252	0.0271864	0.924014	1.64396	2	3	KCNK1,KCNK6
424	REACTOME_HSP90_CHAPERONE_CYCLE_FOR_STEROID_HORMONE_RECEPTORS_SHR_IN_THE_PRESENCE_OF_LIGAND	0.0110132	0.0393399	0.432797	1.64355	4	45	HSPA1A,HSPA1B,DNAJB1,FKBP4,HSPA2,CAPZB,FKBP5,DCTN2,DNAJA2
425	REACTOME_GLUCOCORTICOID_BIOSYNTHESIS	0.00840336	0.0330226	0.921782	1.63999	3	3	HSD11B2,HSD11B1
426	REACTOME_SIGNALING_BY_FLT3_ITD_AND_TKD_MUTANTS	0.026087	0.0733757	0.581059	1.63983	11	14	PIM1,GAB2,BCL2L1,CDKN1A,GRB2,KRAS,HRAS,STAT5B,STAT5A
427	REACTOME_DEPOLYMERISATION_OF_THE_NUCLEAR_LAMINA	0.026087	0.0733757	0.580953	1.63953	11	14	LPIN1,LMNA,EMD,LEMD2,CTDNEP1,PRKCA
428	REACTOME_INTERLEUKIN_2_SIGNALING	0.0195228	0.0596004	0.67955	1.63819	8	8	SHC1,JAK1,PTK2B,STAT5B,STAT5A,JAK3,LCK
429	REACTOME_STAT3_NUCLEAR_EVENTS_DOWNSTREAM_OF_ALK_SIGNALING	0.0274262	0.0764421	0.657576	1.63816	12	9	PRDM1,HIF1A,CD274,STAT3,EP300,HDAC2,HDAC1
430	REACTOME_INTERLEUKIN_10_SIGNALING	0.0146751	0.0488461	0.480581	1.63803	6	28	PTGS2,IL1RN,PTAFR,TNFRSF1A,IL1B,IL1A,JAK1,STAT3,TIMP1,CXCL8,ICAM1,LIF,CCL22,IL18,CCL20,CSF2,CD86,CCL5
431	REACTOME_TRAFFICKING_AND_PROCESSING_OF_ENDOSOMAL_TLR	0.0238612	0.0683325	0.645031	1.63798	10	10	UNC93B1,LGMN,HSP90B1,CNPY3,CTSB,CTSL
432	REACTOME_DEFECTIVE_B4GALT7_CAUSES_EDS_PROGEROID_TYPE	0.0261438	0.0733757	0.565268	1.63776	11	15	SDC4,SDC1,GPC4,SDC2,CSPG4,B4GALT7,HSPG2,AGRN,GPC1
433	REACTOME_G_BETA_GAMMA_SIGNALLING_THROUGH_CDC42	0.0238612	0.0683325	0.644064	1.63552	10	10	GNB2,GNB1,GNG5,GNG4,PAK1,GNB5
434	REACTOME_SIGNALING_BY_SCF_KIT	0.0196078	0.0596004	0.449264	1.6354	8	39	GRB7,LYN,GAB2,SRC,RAC1,GRB2,GRB10,YES1,PRKCA,VAV1,SOCS1,CBL,PTPRU,KRAS,HRAS,STAT5B,STAT3,SH2B2,TEC,STAT5A
435	REACTOME_RUNX2_REGULATES_CHONDROCYTE_MATURATION	0.0128205	0.044238	0.856069	1.63256	5	4	CBFB,RUNX2,GLI2
436	REACTOME_THROMBOXANE_SIGNALLING_THROUGH_TP_RECEPTOR	0.0299786	0.0819958	0.586224	1.63013	13	13	GNB2,GNB1,GNA13,GNA15,GNG5,GNG4,GNA11
437	REACTOME_INLB_MEDIATED_ENTRY_OF_LISTERIA_MONOCYTOGENES_INTO_HOST_CELL	0.0282609	0.0780931	0.575942	1.62539	12	14	UBC,SH3GL1,SH3KBP1,GRB2,CBL,STAM,MET,HGS,RPS27A,UBB
438	REACTOME_ERKS_ARE_INACTIVATED	0.0299786	0.0819958	0.584408	1.62508	13	13	DUSP7,MAPK3,PPP2CB,PPP2R1A,PPP2CA,PPP2R5D,DUSP6,MAPK1,DUSP3,DUSP4
439	REACTOME_CROSS_PRESENTATION_OF_PARTICULATE_EXOGENOUS_ANTIGENS_PHAGOSOMES	0.0369565	0.0952591	0.701451	1.62091	16	7	NCF1,ITGB5,NCF2
440	REACTOME_ADORA2B_MEDIATED_ANTI_INFLAMMATORY_CYTOKINES_PRODUCTION	0.0162413	0.0523295	0.422488	1.61903	6	51	ADM,GNAS,GNB2,GNB1,GNAI2,HTR7,PRKACA,GNAI1,ADCY7,GNG5,ADRB1,ADORA2B,GNG4,ADCY9,GNAI3,PRKX,PTGER4,VIPR1,ADRB2,GIPR,GNB5
441	REACTOME_TRANSLOCATION_OF_SLC2A4_GLUT4_TO_THE_PLASMA_MEMBRANE	0.00677201	0.0276896	0.409457	1.61659	2	61	ACTG1,RAB14,MYO1C,RAC1,AKT2,SFN,RAB10,ACTB,TBC1D1,TUBB2A,YWHAZ,AKT1,YWHAG,RHOQ,YWHAH,STX4,RAB13,MYH9,PRKAG2,RALA,EXOC4,RAB4A,MYO5A,KIF3B,TUBA4A
442	REACTOME_ACTIVATED_TAK1_MEDIATES_P38_MAPK_ACTIVATION	0.0151515	0.0499225	0.49589	1.61556	6	23	UBC,MAP2K3,IRAK2,MAPKAPK2,TAB2,IRAK1,RIPK2,MAPK14,TAB3,NOD1,UBE2V1,MAP3K7,MAPKAPK3,MAPK11,RPS27A,UBB
443	REACTOME_GLUCAGON_LIKE_PEPTIDE_1_GLP1_REGULATES_INSULIN_SECRETION	0.0226337	0.0666599	0.476796	1.61272	10	27	GNAS,GNB2,GNB1,ITPR3,PRKACA,GNG5,GNG4,RAP1A
444	REACTOME_CONSTITUTIVE_SIGNALING_BY_LIGAND_RESPONSIVE_EGFR_CANCER_VARIANTS	0.0234043	0.0681813	0.516038	1.61232	10	19	UBC,SHC1,EGF,GRB2,GAB1,CBL,KRAS,HRAS,CDC37
445	REACTOME_BETA_CATENIN_INDEPENDENT_WNT_SIGNALING	0.00241546	0.0141606	0.357884	1.61135	0	126	UBC,DVL1,GNB2,SMURF1,GNB1,ITPR3,DVL2,FZD5,RAC2,RAC3,RAC1,PSME4,CLTA,PPP3R1,DVL3,AP2A1,AP2A2,AP2S1,CLTC,PSMA6,PPP3CB,RHOA,PSMD3,PRKCA,PLCB3,GNG5,PFN1,KRAS,NFATC1,TCF7L1,TCF7L2,CLTB,GNG4,ARRB2,CTNNB1,PSMD9,VANGL2,PPP3CA,ROR2,MYC,SCRIB,AGO2,AP2B1,FZD1
446	REACTOME_LOSS_OF_FUNCTION_OF_SMAD2_3_IN_CANCER	0.0434783	0.107429	0.695848	1.60796	19	7	SMAD3,TGFB1,TGFBR1,SMAD2
447	REACTOME_ADVANCED_GLYCOSYLATION_ENDPRODUCT_RECEPTOR_SIGNALING	0.0305677	0.0827639	0.598476	1.60772	13	12	MAPK3,PRKCSH,APP,MAPK1,DDOST
448	REACTOME_POTENTIAL_THERAPEUTICS_FOR_SARS	0.00449438	0.0216713	0.392804	1.6071	1	75	RCOR1,ATP1B1,IL6R,FKBP4,VEGFA,IFNGR2,GATAD2B,ATP1A1,CUL3,KEAP1,ITGB1,AP2A1,RBBP7,PHF21A,AP2A2,AP2S1,GATAD2A,JAK1,CHD4,SIGMAR1,MTA1,IMPDH1,FURIN,BRD4
449	REACTOME_RHOF_GTPASE_CYCLE	0.0217865	0.0645185	0.44133	1.60652	9	39	CAPZB,DIAPH1,FARP1,BAIAP2L1,ACTB,ARHGAP1,SLC4A7,RAB7A,MYO9B,ACTN1,ARHGAP21,ESYT1,SRGAP2,VAMP3,SOWAHC,BASP1,ARHGAP5
450	REACTOME_FC_EPSILON_RECEPTOR_FCERI_SIGNALING	0.00236407	0.0141606	0.362746	1.60555	0	116	UBC,JUN,SHC1,BCL10,LYN,AHCYL1,MAPK3,UBE2D2,GAB2,RELA,ITPR3,FOS,CDC34,CARD11,MAPK9,TAB2,RAC1,PSME4,PPP3R1,PLCG2,PSMA6,GRB2,PPP3CB,NFKBIA,PSMD3,VAV1,PAK2,FBXW11,KRAS,NFATC1,HRAS,PIK3CB,VAV2,PDPK1,MAP2K7,NFKB1,PSMD9,TEC,PPP3CA
451	REACTOME_LOSS_OF_MECP2_BINDING_ABILITY_TO_THE_NCOR_SMRT_COMPLEX	0.0367965	0.0949988	0.735419	1.60441	16	6	MECP2,TBL1X,NCOR2,NCOR1
452	REACTOME_P75NTR_REGULATES_AXONOGENESIS	0.0367965	0.0949988	0.734989	1.60347	16	6	RTN4R,RTN4,NGFR,ARHGDIA,RHOA
453	REACTOME_FATTY_ACID_METABOLISM	0.00242131	0.0141606	0.349552	1.60199	0	145	PPARD,PTGS2,GPX4,FASN,TECR,SCD,MID1IP1,ELOVL7,ECI1,CYP4F3,MAPKAPK2,FADS1,ELOVL5,ACACA,CRAT,HSD17B12,SLC25A1,ACOT7,FADS2,CYP1B1,ACSL3,ACLY,ALOX15B,ABCC1,ACSL1,CYP4F11,ACADVL,RXRA,NUDT19,PCCB,ACADS,ELOVL1,GPX1,PRKAG2,HPGD,ACSL4,ELOVL4,ALOX15,PTGES2,CBR1,ACS
454	REACTOME_RHOD_GTPASE_CYCLE	0.0183486	0.0572861	0.418374	1.60115	7	50	EFHD2,CAPZB,ARHGAP17,WHAMM,EMD,DIAPH1,PAK6,ARHGAP1,SLC4A7,PGRMC2,RAB7A,LMAN1,ACTN1,ARHGAP21,DBN1,ESYT1,ARHGAP35,VAMP3,ARHGAP5,RHOD
455	REACTOME_CALCINEURIN_ACTIVATES_NFAT	0.0337553	0.0892935	0.642325	1.60017	15	9	PPP3R1,PPP3CB,NFATC1,PPP3CA
456	REACTOME_ACYL_CHAIN_REMODELING_OF_DAG_AND_TAG	0.0249433	0.0707459	0.793503	1.59829	10	5	DGAT1,PNPLA2,PNPLA3,DGAT2,MGLL
457	REACTOME_BETA_CATENIN_PHOSPHORYLATION_CASCADE	0.0252632	0.0715271	0.53132	1.59796	11	17	PPP2R5A,AXIN1,PPP2CB,PPP2R1A,PPP2CA,GSK3B,CSNK1A1,PPP2R5B,FRAT2,PPP2R5D,CTNNB1
458	REACTOME_P130CAS_LINKAGE_TO_MAPK_SIGNALING_FOR_INTEGRINS	0.0303688	0.082642	0.628862	1.59692	13	10	SRC,BCAR1,CRK,TLN1,RAP1A,RAP1B,PTK2,ITGB3
459	REACTOME_ACTIVATION_OF_RAC1_DOWNSTREAM_OF_NMDARS	0.04329	0.107128	0.731888	1.59671	19	6	RAC1,GIT1,ARHGEF7,CAMKK2,CALM1,CAMKK1
460	REACTOME_RHO_GTPASES_ACTIVATE_KTN1	0.0303688	0.082642	0.62871	1.59654	13	10	RHOG,RAC1,KLC3,RHOA,KIF5B,KLC2,KLC1
461	REACTOME_MTOR_SIGNALLING	0.021978	0.0649662	0.438379	1.59276	9	40	RRAGD,RHEB,RRAGC,AKT2,EIF4EBP1,EIF4G1,AKT1,STK11,LAMTOR5,PPM1A,PRKAG2,EIF4B,CAB39,LAMTOR1,PRKAB1,MLST8,RRAGA,EIF4E,MTOR,LAMTOR3,RPTOR,YWHAB
462	REACTOME_REGULATION_OF_LIPID_METABOLISM_BY_PPARALPHA	0.00240385	0.0141606	0.366872	1.59177	0	106	NR1D1,SREBF1,SLC27A1,SP1,ESRRA,ME1,HMGCS1,PPARG,SREBF2,FADS1,NCOA3,ARNT,MED13L,FDFT1,PPARA,G0S2,TRIB3,NCOA6,ACSL1,TNFRSF21,MED15,MED16,RXRA,CARM1,ALAS1,MED24,NPAS2,ANGPTL4,PPARGC1A,TBL1X,MTF1,CDK8,HELZ2,NCOR2,NCOR1,MED26,NR1H2,PLIN2,MED6,MED25,RORA,MED14,
463	REACTOME_IMMUNOREGULATORY_INTERACTIONS_BETWEEN_A_LYMPHOID_AND_A_NON_LYMPHOID_CELL	0.0162413	0.0523295	0.415059	1.59056	6	51	HLA-A,CD81,NECTIN2,HLA-E,CD99,MICA,ITGB7,COL17A1,ITGB1,HLA-C,HLA-B,NPDC1,HLA-F,MICB,ICAM1,TREM1,CDH1,CD40,PVR
464	REACTOME_MODULATION_BY_MTB_OF_HOST_IMMUNE_SYSTEM	0.0454545	0.11088	0.728785	1.58993	20	6	UBC,RPS27A,UBB,TLR2,UBA52,B2M
465	REACTOME_REGULATION_OF_PTEN_LOCALIZATION	0.035865	0.0933416	0.636598	1.5859	16	9	UBC,USP7,PML,XIAP,PTEN
466	REACTOME_CD28_CO_STIMULATION	0.0188679	0.0584543	0.465088	1.58522	8	28	LYN,SRC,RAC1,AKT2,GRB2,TRIB3,YES1,AKT1,MAPKAP1,VAV1,PAK2,MAP3K8,PDPK1,AKT3,CD86,PAK1,MLST8,PIK3CA,MTOR
467	REACTOME_PURINERGIC_SIGNALING_IN_LEISHMANIASIS_INFECTION	0.0344086	0.0902806	0.501011	1.58459	15	20	HMOX1,RELA,APP,IL1B,NFKB2,IL1A,IL18,NFKB1,PYCARD,HSP90AB1,P2RX4,TXN,GSDMD,NT5E
468	REACTOME_MUCOPOLYSACCHARIDOSES	0.0327511	0.0873543	0.604951	1.58282	14	11	GUSB,NAGLU,HYAL1,GNS,GLB1,SGSH,ARSB
469	REACTOME_SIGNALING_BY_ALK_IN_CANCER	0.0159817	0.0519225	0.408856	1.58192	6	54	SQSTM1,JUNB,CEBPB,SHC1,MSN,PPFIBP1,MAPK3,STRN,BCL2A1,TPM4,RRBP1,CLTC,GRB2,MECP2,PPM1B,VCL,HIP1,STAT3,MYH9,KIF5B,STAT5A,EIF2AK3
470	REACTOME_MATURATION_OF_SARS_COV_1_SPIKE_PROTEIN	0.0249433	0.0707459	0.784599	1.58035	10	5	PRKCSH,MGAT1,MOGS,GANAB,CANX
471	REACTOME_HEME_SIGNALING	0.0196078	0.0596004	0.419218	1.57997	8	44	NR1D1,HMOX1,CRTC2,PPARA,MEF2D,MAFK,NCOA6,BACH1,CRTC3,RXRA,CARM1,NPAS2,PPARGC1A,TBL1X,HELZ2,RAI1,NCOR1
472	REACTOME_PASSIVE_TRANSPORT_BY_AQUAPORINS	0.0400844	0.101375	0.633492	1.57816	18	9	AQP3,AQP4,AQP5,AQP6
473	REACTOME_ACTIVATION_OF_KAINATE_RECEPTORS_UPON_GLUTAMATE_BINDING	0.035865	0.0933416	0.532993	1.57806	16	16	GNB2,GNB1,PLCB3,GNG5,GNG4,DLG3,GNB5,DLG4
474	REACTOME_SIGNALING_BY_ERBB4	0.020316	0.0612905	0.409833	1.57644	8	49	UBC,EREG,HBEGF,SHC1,WWP1,SRC,EGF,APH1A,TAB2,YAP1,ADAM17,GRB2,KRAS,HRAS,NRG2,ADAP1,NCOR1,ITCH,STAT5A
475	REACTOME_ACTIVATION_OF_THE_AP_1_FAMILY_OF_TRANSCRIPTION_FACTORS	0.0390456	0.0996868	0.620246	1.57504	17	10	JUN,MAPK3,FOS,MAPK9,MAPK14
476	REACTOME_DAP12_INTERACTIONS	0.027957	0.0776529	0.481372	1.57263	12	24	SHC1,HLA-E,RAC1,PLCG2,GRB2,HLA-C,HLA-B,KRAS,HRAS,PIK3CB,VAV2,TREM1
477	REACTOME_TRAF6_MEDIATED_NF_KB_ACTIVATION	0.027957	0.0776529	0.481053	1.57159	12	24	RELA,APP,NFKBIA,NFKB2,TRIM25,RNF135,NFKBIB,NFKB1,NKIRAS2
478	REACTOME_BIOSYNTHESIS_OF_SPECIALIZED_PRORESOLVING_MEDIATORS_SPMS	0.035865	0.0933416	0.530737	1.57138	16	16	PTGS2,GPX4,HPGD,ALOX15,ALOX5,LTA4H,CYP2E1,ALOX12,CYP1A1
479	REACTOME_SYNTHESIS_OF_PE	0.0412148	0.103261	0.618735	1.5712	18	10	LPIN1,ETNK2,CHKA,PCYT2,LPIN2,CEPT1,ETNK1
480	REACTOME_RHOV_GTPASE_CYCLE	0.0215517	0.0640587	0.435655	1.5706	9	37	RHOV,EPHA2,NCK2,WASL,PAK4,SPTBN1,PARD6B,TPM4,PAK6,CLTC,PAK2,MAP3K11,SH3RF1,GIT1,ARHGEF7
481	REACTOME_MHC_CLASS_II_ANTIGEN_PRESENTATION	0.00231482	0.0141606	0.360087	1.57027	0	103	SEC24A,CAPZB,CTSD,SEC24D,DCTN2,ARF1,RILP,SEC13,SEC23A,CLTA,KLC3,AP2A1,AP2A2,AP2S1,SEC24C,CLTC,CD74,RAB7A,DNM2,CTSA,ACTR1B,TUBB2A,AP1B1,LGMN,CTSB,KIF3C,OSBPL1A,CTSL,KIF5B,CTSH,DYNC1H1,KIF3B,TUBA4A,AP1M1,AP2B1,KIF2A
482	REACTOME_ERYTHROPOIETIN_ACTIVATES_PHOSPHOLIPASE_C_GAMMA_PLCG	0.0497836	0.118993	0.719465	1.5696	22	6	IRS2,LYN,PLCG2
483	REACTOME_TICAM1_TRAF6_DEPENDENT_INDUCTION_OF_TAK1_COMPLEX	0.0393013	0.100023	0.599681	1.56903	17	11	UBC,TICAM1,TAB2,TAB3,MAP3K7,RPS27A,UBB
484	REACTOME_SHC_MEDIATED_CASCADE_FGFR4	0.0443038	0.108801	0.629398	1.56797	20	9	SHC1,GRB2,KRAS,HRAS
485	REACTOME_ENERGY_DEPENDENT_REGULATION_OF_MTOR_BY_LKB1_AMPK	0.0209644	0.0630104	0.459976	1.5678	9	28	RRAGD,RHEB,RRAGC,STK11,LAMTOR5,PPM1A,PRKAG2,CAB39,LAMTOR1,PRKAB1,MLST8,RRAGA,MTOR,LAMTOR3,RPTOR
486	REACTOME_LYSOSPHINGOLIPID_AND_LPA_RECEPTORS	0.0393013	0.100023	0.598978	1.56719	17	11	LPAR5,PLPPR3,S1PR2,PLPPR2,LPAR2,LPAR3,S1PR1
487	REACTOME_RUNX3_REGULATES_BCL2L11_BIM_TRANSCRIPTION	0.0272109	0.076093	0.777809	1.56668	11	5	SMAD3,FOXO3,BCL2L11,RUNX3
488	REACTOME_NR1H3_NR1H2_REGULATE_GENE_EXPRESSION_LINKED_TO_CHOLESTEROL_TRANSPORT_AND_EFFLUX	0.0236051	0.0683325	0.450774	1.56378	10	30	ARL4C,EEPD1,ABCG1,RXRA,PLTP,TBL1X,KDM1B,NCOR2,NCOR1,NR1H2,AGO2,RXRB,NCOA1,EP300
489	REACTOME_COPII_MEDIATED_VESICLE_TRANSPORT	0.0090703	0.033982	0.392478	1.56332	3	65	SEC24A,SEC24D,GOLGA2,SEC13,SEC23A,LMAN2,TRAPPC9,TMED10,AREG,TRAPPC1,SEC24C,LMAN1,TGFA,CSNK1D,RAB1A,NAPA,TRAPPC10,PPP6R1,RAB1B,MCFD2,SEC16A,CTSZ
490	REACTOME_SYNTHESIS_OF_12_EICOSATETRAENOIC_ACID_DERIVATIVES	0.0497836	0.118993	0.715573	1.56111	22	6	GPX4,GPX1,ALOX15,ALOXE3,ALOX12,GPX2
491	REACTOME_SIGNALING_BY_HIPPO	0.0344086	0.0902806	0.493023	1.55932	15	20	TJP2,DVL2,LATS2,YAP1,SAV1,MOB1A,STK3,AMOTL1,LATS1,YWHAB,STK4,YWHAE,AMOTL2,WWTR1,WWC1
492	REACTOME_NEGATIVE_REGULATION_OF_TCF_DEPENDENT_SIGNALING_BY_DVL_INTERACTING_PROTEINS	0.0362812	0.0942339	0.773341	1.55768	15	5	DVL1,DVL2,DVL3,CCDC88C
493	REACTOME_CA2_PATHWAY	0.0202703	0.0612672	0.406473	1.55728	8	47	GNB2,GNB1,ITPR3,FZD5,PPP3R1,PPP3CB,PRKCA,PLCB3,GNG5,KRAS,NFATC1,TCF7L1,TCF7L2,GNG4,CTNNB1,PPP3CA,MYC,AGO2
494	REACTOME_BUDDING_AND_MATURATION_OF_HIV_VIRION	0.0230608	0.0674246	0.456868	1.55721	10	28	UBC,MVB12A,UBAP1,VPS37C,CHMP4B,CHMP7,VPS37B,NEDD4L,VPS37A,VPS37D,VPS4A,VPS28
495	REACTOME_INTEGRIN_CELL_SURFACE_INTERACTIONS	0.0209302	0.0630104	0.404949	1.557	8	52	F11R,ITGA3,ITGB5,ITGA5,ITGB7,ITGB1,BSG,ITGA6,CD44,COL4A2,TNC,COL16A1,ICAM1,COL18A1,COL4A5,CDH1,HSPG2,AGRN,COL4A6,COL1A1,ICAM5,FBN1,ITGB3
496	REACTOME_NOTCH3_INTRACELLULAR_DOMAIN_REGULATES_TRANSCRIPTION	0.0344086	0.0902806	0.492259	1.55691	15	20	HES1,NOTCH3,HEY1,PLXND1,MAML1,KAT2A,KAT2B
497	REACTOME_PTEN_REGULATION	0.00244499	0.0141606	0.342723	1.55546	0	134	HDAC5,RCOR1,RRAGD,UBC,JUN,MKRN1,RHEB,CSNK2A2,MAPK3,CSNK2A1,PPARG,GATAD2B,RRAGC,PHC2,PSME4,AKT2,RBBP7,ATN1,PSMA6,USP7,CBX4,PSMD3,AKT1,MAF1,GATAD2A,LAMTOR5,TNKS2,CHD4,RING1,PML,CBX6,SUZ12,MTA1,XIAP,PTEN,PSMD9,AKT3,HDAC7,AGO2,TNKS,SNAI2,LAMTOR1,MAPK1,CHD3,ML
498	REACTOME_ERBB2_ACTIVATES_PTK6_SIGNALING	0.0458515	0.111413	0.578629	1.5544	20	12	EREG,HBEGF,EGF,PTK6,ERBB2,NRG2
499	REACTOME_SIGNALING_BY_CTNNB1_PHOSPHO_SITE_MUTANTS	0.0522876	0.122792	0.536468	1.55432	23	15	PPP2R5A,AXIN1,PPP2CB,PPP2R1A,PPP2CA,GSK3B,CSNK1A1,PPP2R5B,PPP2R5D,CTNNB1
500	REACTOME_SENSORY_PERCEPTION_OF_SALTY_TASTE	0.0320513	0.0860064	0.814461	1.55321	14	4	SCNN1G,SCNN1B,SCNN1A
501	REACTOME_ADENYLATE_CYCLASE_INHIBITORY_PATHWAY	0.0436681	0.107733	0.593544	1.55297	19	11	GNAI2,GNAI1,ADCY7,ADCY9,GNAI3
502	REACTOME_SIGNALING_BY_NOTCH3	0.023913	0.0683325	0.417941	1.5524	10	42	HES1,UBC,YBX1,EGF,APH1A,NOTCH3,HEY1,PLXND1,MAML1,MIB1,KAT2A,KAT2B,JAG1
503	REACTOME_SIGNALING_BY_FGFR1	0.0288889	0.0795556	0.435305	1.55096	12	36	UBC,SHC1,MAPK3,PPP2CB,SPRED2,SRC,PPP2R1A,PPP2CA,GRB2,GAB1,CBL,KRAS,HRAS,FGFRL1,SPRED1,MAPK1,BRAF,PIK3CA,SPRY2,PTPN11
504	REACTOME_REGULATION_OF_MECP2_EXPRESSION_AND_ACTIVITY	0.0230608	0.0674246	0.4545	1.54913	10	28	PRKACA,HTT,MECP2,HIPK2,TBL1X,NCOR2,NCOR1,CAMK2D,AGO2,CAMK2G
505	REACTOME_NRCAM_INTERACTIONS	0.0519481	0.122438	0.709146	1.54709	23	6	NRP2,DLG3,NRCAM,DLG4,ANK1
506	REACTOME_IRS_ACTIVATION	0.034188	0.0901423	0.810991	1.54659	15	4	IRS2,GRB10,INSR
507	REACTOME_CONSTITUTIVE_SIGNALING_BY_ABERRANT_PI3K_IN_CANCER	0.0162413	0.0523295	0.403353	1.5457	6	51	EREG,HBEGF,IRS2,GAB2,RAC2,SRC,RHOG,STRN,EGF,RAC1,PIK3CD,AREG,GRB2,TGFA,VAV1,GAB1,ERBB2,NRG2,PIK3CB
508	REACTOME_REGULATION_OF_IFNG_SIGNALING	0.0556745	0.128314	0.555357	1.5443	25	13	SOCS3,IFNGR2,PTPN1,JAK1,SOCS1,SUMO1,PTPN6,PTPN2,PTPN11
509	REACTOME_ACYL_CHAIN_REMODELLING_OF_PG	0.0455531	0.11088	0.608092	1.54418	20	10	LPCAT4,PLA2G3,LPGAT1,LPCAT1,PLA2G4A,PLA2G4F
510	REACTOME_GRB7_EVENTS_IN_ERBB2_SIGNALING	0.0408163	0.102692	0.765341	1.54156	17	5	GRB7,ERBB2,NRG2,ERBB3
511	REACTOME_CHYLOMICRON_CLEARANCE	0.034188	0.0901423	0.80787	1.54064	15	4	LDLR,LDLRAP1
512	REACTOME_CHK1_CHK2_CDS1_MEDIATED_INACTIVATION_OF_CYCLIN_B_CDK1_COMPLEX	0.0556745	0.128314	0.553927	1.54032	25	13	WEE1,SFN,YWHAZ,YWHAG,YWHAH,YWHAQ
513	REACTOME_CARDIAC_CONDUCTION	0.0113636	0.0402348	0.382633	1.5394	4	68	KCNK1,ATP1B1,AHCYL1,ATP2A2,ITPR3,ATP2B4,KCNK5,ATP1A1,STIM1,KCNQ1,PRKACA,KCNK6,ASPH,RYR1,ORAI1,CACNB1
514	REACTOME_TNFR1_INDUCED_NFKAPPAB_SIGNALING_PATHWAY	0.0272537	0.076093	0.451341	1.53837	12	28	UBC,TNFRSF1A,OTUD7B,TAB2,RBCK1,XIAP,USP21,TRADD,TAB3,USP4,USP2,MAP3K7,TNFAIP3,SHARPIN,RPS27A,UBB,RACK1
515	REACTOME_DISEASES_ASSOCIATED_WITH_GLYCOSAMINOGLYCAN_METABOLISM	0.0321888	0.0861399	0.443289	1.53782	14	30	SDC4,SDC1,HEXB,GPC4,EXT1,CHST6,SDC2,B3GAT3,B4GALT1,CSPG4,B4GALT7,HSPG2,PAPSS2,AGRN,GPC1
516	REACTOME_SENSORY_PERCEPTION_OF_TASTE	0.0319149	0.0858345	0.491636	1.53608	14	19	SCNN1G,GNB1,ITPR3,SCNN1B,SCNN1A,TRPM4
517	REACTOME_DAG_AND_IP3_SIGNALING	0.0372807	0.0959412	0.431954	1.5352	16	34	GRK2,AHCYL1,ITPR3,PRKACA,PRKCD,PRKCA,ADCY7,ADCY9,CAMK2D,PRKX,CAMK2G,CAMKK2
518	REACTOME_INOSITOL_PHOSPHATE_METABOLISM	0.0311111	0.0839531	0.412161	1.53519	13	43	PLCD3,ITPKC,INPP5A,PLCD1,PLCG2,ISYNA1,ITPK1,OCRL,INPP1,PLCB3,ITPKB,NUDT3,IPMK,PTEN,INPP4A,INPP5B
519	REACTOME_SYNTHESIS_OF_PROSTAGLANDINS_PG_AND_THROMBOXANES_TX	0.0502183	0.1195	0.570695	1.53309	22	12	PTGS2,HPGD,PTGES2,CBR1,PTGS1,AKR1C3,PTGES3,PTGES,PRXL2B
520	REACTOME_SCAVENGING_BY_CLASS_A_RECEPTORS	0.056962	0.129796	0.615261	1.53275	26	9	FTL,FTH1,HSP90B1,COL4A2,COL1A1,CALR,COL4A1
521	REACTOME_RUNX1_AND_FOXP3_CONTROL_THE_DEVELOPMENT_OF_REGULATORY_T_LYMPHOCYTES_TREGS	0.0363248	0.0942339	0.803561	1.53243	16	4	CBFB,TNFRSF18,RUNX1
522	REACTOME_ALPHA_PROTEIN_KINASE_1_SIGNALING_PATHWAY	0.0502183	0.1195	0.584999	1.53062	22	11	UBC,TAB2,TIFA,TAB3,MAP3K7,RPS27A,UBB
523	REACTOME_REGULATION_OF_CYTOSKELETAL_REMODELING_AND_CELL_SPREADING_BY_IPP_COMPLEX_COMPONENTS	0.0543478	0.12689	0.661488	1.52857	24	7	ACTN1,TESK1,PXN,PARVA,LIMS1
524	REACTOME_DSCAM_INTERACTIONS	0.056962	0.129796	0.612997	1.52711	26	9	MAPK13,NTN1,RAC1,MAPK14,PAK1,MAPK11
525	REACTOME_NEGATIVE_REGULATION_OF_ACTIVITY_OF_TFAP2_AP_2_FAMILY_TRANSCRIPTION_FACTORS	0.0629067	0.138636	0.633423	1.52699	28	8	UBE2I,TFAP2A,SUMO1,TFAP2C,KCTD1,WWOX,TFAP2E
526	REACTOME_RUNX1_REGULATES_TRANSCRIPTION_OF_GENES_INVOLVED_IN_WNT_SIGNALING	0.0405983	0.102439	0.800429	1.52645	18	4	CBFB,AXIN1,RUNX1
527	REACTOME_GLYCOSPHINGOLIPID_METABOLISM	0.0306346	0.0828059	0.421652	1.52555	13	38	GM2A,HEXB,NEU1,UGCG,ARSI,SUMF2,GLTP,CTSA,PSAP,ESYT1,ARSA,SMPD1,ARSK,CPTP,GBA2,ARSJ,GLB1,ARSG,CERK,ARSB,ESYT2
528	REACTOME_ACTIVATION_OF_MATRIX_METALLOPROTEINASES	0.0437637	0.107803	0.478159	1.52539	19	21	MMP14,MMP1,TIMP2,TIMP1,COL18A1,FURIN,MMP17,MMP10,MMP15,MMP2,MMP9,MMP13
529	REACTOME_PROGRAMMED_CELL_DEATH	0.00242131	0.0141606	0.319987	1.52518	0	194	H1-0,UBC,BBC3,PELI1,TJP2,TICAM1,MAPK3,IRF1,DAPK2,STK24,LMNA,PPP3CC,BCL2L1,BAK1,UNC5B,PSME4,AKT2,TP53BP2,SFN,PPP3R1,PMAIP1,DAPK3,TNFRSF10B,IL1B,CFLAR,PRKCD,KPNB1,PSMA6,TNFRSF10A,DSG2,SDCBP,PSMD3,YWHAZ,AKT1,YWHAG,IL1A,PAK2,NMT1,FLOT1,CHMP4B,ADD1,C1QBP,YWHAH
530	REACTOME_ARYL_HYDROCARBON_RECEPTOR_SIGNALLING	0.0584416	0.132792	0.69877	1.52445	26	6	ARNT,AIP,HSP90AB1,PTGES3,AHR,ARNT2
[truncated: 1,081 more rows]

## Sheet: PS
	pathway	pval	padj	ES	NES	nMoreExtreme	size	leadingEdge
[truncated: 1,611 more rows]
